# Supplementary material for: Butyrate Feeding Reverses CypD-Related Mitoflash Phenotypes in Mouse Myofibers
Source: Int J Mol Sci. 2021 Jul 10;22(14):7412. doi: 10.3390/ijms22147412 (PMC8304904; doi:10.3390/ijms22147412)
Supplement: Supplementary file 1 [file ijms-22-07412-s001.zip]

Archive with 17 entries (17 files):
- Figure S1.png
- Figure S2.png
- Spreadsheet S1.xlsx
- Spreadsheet S2.xlsx
- Spreadsheet S3.xlsx
- Spreadsheet S4.xlsx
- Supplementary Material description.pdf
- Video S1.mp4
- Video S10.mp4
- Video S2.mp4
- Video S3.mp4
- Video S4.mp4
- Video S5.mp4
- Video S6.mp4
- Video S7.mp4
- Video S8.mp4
- Video S9.mp4
