# Supplementary material for: Butyrate Feeding Reverses CypD-Related Mitoflash Phenotypes in Mouse Myofibers
Source: Int J Mol Sci. 2021 Jul 10;22(14):7412. doi: 10.3390/ijms22147412 (PMC8304904; doi:10.3390/ijms22147412)
Supplement: Supplementary file 1 [file ijms-22-07412-s001.zip › Spreadsheet S1.xlsx]

## Sheet: Sheet1
Recording	Mouse ID	Gender	Age	Mitoflash location	jRCaMP1b fusion protein	jRCaMP1b response
4480_S036_ROI1_peri	4480	Female	6 month	Perinuclear	CypDS42A	no change
4480_S031_ROI1_peri	4480	Female	6 month	Perinuclear	CypDS42A	no change
4480_S028_ROI1_peri	4480	Female	6 month	Perinuclear	CypDS42A	no change
4480_S028_ROI2_peri	4480	Female	6 month	Perinuclear	CypDS42A	no change
4480_S027_ROI1_peri	4480	Female	6 month	Perinuclear	CypDS42A	no change
4480_S026_ROI1_peri	4480	Female	6 month	Perinuclear	CypDS42A	decrease
4480_S026_ROI2_inter	4480	Female	6 month	Interfibrillar	CypDS42A	no change
4480_S026_ROI3_inter	4480	Female	6 month	Interfibrillar	CypDS42A	no change
4480_S025_ROI1_peri	4480	Female	6 month	Perinuclear	CypDS42A	no change
4480_S025_ROI2_peri	4480	Female	6 month	Perinuclear	CypDS42A	no change
4480_S023_ROI1_peri	4480	Female	6 month	Perinuclear	CypDS42A	no change
4480_S007_ROI1_peri	4480	Female	6 month	Perinuclear	CypDS42A	no change
4480_S007_ROI2_peri	4480	Female	6 month	Perinuclear	CypDS42A	no change
4480_S006_ROI1_peri	4480	Female	6 month	Perinuclear	CypDS42A	no change
4480_S006_ROI2_peri	4480	Female	6 month	Perinuclear	CypDS42A	no change
4480_S002_ROI1_peri	4480	Female	6 month	Perinuclear	CypDS42A	no change
4480_S002_ROI1_inter	4480	Female	6 month	Interfibrillar	CypDS42A	no change
4480_S007_ROI1_inter	4480	Female	6 month	Interfibrillar	CypDS42A	no change
4480_S027_ROI1_inter	4480	Female	6 month	Interfibrillar	CypDS42A	no change
4429_S028_ROI1_peri	4429	Female	6 month	Perinuclear	CypDS42A	no change
4429_S015_ROI1_peri	4429	Female	6 month	Perinuclear	CypDS42A	no change
4463_S027_ROI1_peri	4463	Male	5 month	Perinuclear	CypDS42A	no change
4463_S045_ROI1_peri	4463	Male	5 month	Perinuclear	CypDS42A	no change
4465_S017_ROI1_peri	4465	Male	5 month	Perinuclear	CypDS42A	increase
4429_S020_ROI1_inter	4429	Female	6 month	Interfibrillar	CypDS42A	slight increase
4429_S020_ROI2_inter	4429	Female	6 month	Interfibrillar	CypDS42A	no change
4429_S020_ROI3_inter	4429	Female	6 month	Interfibrillar	CypDS42A	no change
4430_S005_ROI1_inter	4430	Female	6 month	Interfibrillar	CypDS42A	no change
4430_S005_ROI2_inter	4430	Female	6 month	Interfibrillar	CypDS42A	no change
4430_S007_ROI1_inter	4430	Female	6 month	Interfibrillar	CypDS42A	no change
4430_S019_ROI1_inter	4430	Female	6 month	Interfibrillar	CypDS42A	no change
4430_S022_ROI1_inter	4430	Female	6 month	Interfibrillar	CypDS42A	no change
4430_S029_ROI1_inter	4430	Female	6 month	Interfibrillar	CypDS42A	no change
4430_S030_ROI1_inter	4430	Female	6 month	Interfibrillar	CypDS42A	no change
4430_S032_ROI1_inter	4430	Female	6 month	Interfibrillar	CypDS42A	no change
4430_S032_ROI2_inter	4430	Female	6 month	Interfibrillar	CypDS42A	no change
4466_S005_ROI1_inter	4466	Male	6 month	Interfibrillar	CypDS42A	no change
4466_S005_ROI2_inter	4466	Male	6 month	Interfibrillar	CypDS42A	no change
4466_S005_ROI3_inter	4466	Male	6 month	Interfibrillar	CypDS42A	no change
4466_S005_ROI4_inter	4466	Male	6 month	Interfibrillar	CypDS42A	no change
4419_S005_ROI1_peri	4419	Male	4 month	Perinuclear	CypD	increase
4419_S005_ROI2_inter	4419	Male	4 month	Interfibrillar	CypD	no change
4419_S005_ROI3_inter	4419	Male	4 month	Interfibrillar	CypD	no change
4419_S006_ROI1_peri	4419	Male	4 month	Perinuclear	CypD	no change
4419_S005_ROI2_peri	4419	Male	4 month	Perinuclear	CypD	no change
4419_S005_ROI3_inter	4419	Male	4 month	Interfibrillar	CypD	no change
4419_S008_ROI1_peri	4419	Male	4 month	Perinuclear	CypD	no change
4419_S009_ROI1_inter	4419	Male	4 month	Interfibrillar	CypD	slight increase
4419_S009_ROI2_inter	4419	Male	4 month	Interfibrillar	CypD	no change
4419_S009_ROI3_inter	4419	Male	4 month	Interfibrillar	CypD	no change
4419_S009_ROI4_inter	4419	Male	4 month	Interfibrillar	CypD	no change
4419_S009_ROI5_inter	4419	Male	4 month	Interfibrillar	CypD	no change
4419_S019_ROI1_peri	4419	Male	4 month	Perinuclear	CypD	no change
4419_S019_ROI2_inter	4419	Male	4 month	Interfibrillar	CypD	no change
4419_S019_ROI3_inter	4419	Male	4 month	Interfibrillar	CypD	no change
4419_S020_ROI1_peri	4419	Male	4 month	Perinuclear	CypD	no change
4419_S020_ROI2_inter	4419	Male	4 month	Interfibrillar	CypD	no change
4419_S020_ROI3_inter	4419	Male	4 month	Interfibrillar	CypD	no change
4419_S020_ROI4_inter	4419	Male	4 month	Interfibrillar	CypD	no change
4419_S026_ROI1_peri	4419	Male	4 month	Perinuclear	CypD	increase
4419_S026_ROI2_inter	4419	Male	4 month	Interfibrillar	CypD	no change
4419_S026_ROI3_inter	4419	Male	4 month	Interfibrillar	CypD	no change
4419_S027_ROI1_inter	4419	Male	4 month	Interfibrillar	CypD	no change
4419_S030_ROI1_peri	4419	Male	4 month	Perinuclear	CypD	no change
4419_S030_ROI2_peri	4419	Male	4 month	Perinuclear	CypD	no change
4419_S030_ROI3_inter	4419	Male	4 month	Interfibrillar	CypD	no change
4419_S030_ROI4_inter	4419	Male	4 month	Interfibrillar	CypD	no change
4419_S031_ROI1_peri	4419	Male	4 month	Perinuclear	CypD	increase
4419_S033_ROI1_peri	4419	Male	4 month	Perinuclear	CypD	decrease
4419_S035_ROI1_peri	4419	Male	4 month	Perinuclear	CypD	decrease
4419_S036_ROI1_peri	4419	Male	4 month	Perinuclear	CypD	no change
4419_S036_ROI2_peri	4419	Male	4 month	Perinuclear	CypD	no change
4419_S037_ROI1_inter	4419	Male	4 month	Interfibrillar	CypD	no change
4419_S037_ROI2_inter	4419	Male	4 month	Interfibrillar	CypD	no change
4419_S037_ROI3_inter	4419	Male	4 month	Interfibrillar	CypD	no change
4419_S037_ROI4_inter	4419	Male	4 month	Interfibrillar	CypD	no change
4419_S037_ROI5_peri	4419	Male	4 month	Perinuclear	CypD	no change
4419_S039_ROI1_peri	4419	Male	4 month	Perinuclear	CypD	no change
4419_S039_ROI2_peri	4419	Male	4 month	Perinuclear	CypD	decrease
4419_S044_ROI1_peri	4419	Male	4 month	Perinuclear	CypD	decrease
4419_S051_ROI1_peri	4419	Male	4 month	Perinuclear	CypD	no change
4418_S012_ROI1_peri	4418	Male	4 month	Perinuclear	CypD	no change
4418_S012_ROI2_inter	4418	Male	4 month	Interfibrillar	CypD	no change
4418_S014_ROI1_peri	4418	Male	4 month	Perinuclear	CypD	no change
4418_S016_ROI1_peri	4418	Male	4 month	Perinuclear	CypD	decrease
4418_S017_ROI1_peri	4418	Male	4 month	Perinuclear	CypD	no change
4418_S017_ROI2_inter	4418	Male	4 month	Interfibrillar	CypD	no change
4418_S017_ROI3_inter	4418	Male	4 month	Interfibrillar	CypD	no change
4418_S018_ROI1_inter	4418	Male	4 month	Interfibrillar	CypD	no change
4418_S025_ROI1_peri	4418	Male	4 month	Perinuclear	CypD	no change
3028_S004_ROI1_inter	3028	Male	6 month	Interfibrillar	CypD	slight increase
3028_S005_ROI1_inter	3028	Male	6 month	Interfibrillar	CypD	no change
3028_S008_ROI1_peri	3028	Male	6 month	Perinuclear	CypD	decrease
3028_S008_ROI2_inter	3028	Male	6 month	Interfibrillar	CypD	no change
3028_S023_ROI1_peri	3028	Male	6 month	Perinuclear	CypD	decrease
3028_S026_ROI1_inter	3028	Male	6 month	Interfibrillar	CypD	no change
4293_S012_ROI1_inter	4293	Female	4 month	Interfibrillar	CypD	no change
4293_S017_ROI1_peri	4293	Female	4 month	Perinuclear	CypD	no change
4295_S007_ROI1_inter	4295	Female	5 month	Interfibrillar	CypD	no change
4295_S015_ROI1_inter	4295	Female	5 month	Interfibrillar	CypD	no change
4344_S005_ROI1_peri	4344	Female	4 month	Perinuclear	CypD	no change
4344_S009_ROI1_peri	4344	Female	4 month	Perinuclear	CypD	increase
4344_S017_ROI1_peri	4344	Female	4 month	Perinuclear	CypD	decrease
4344_S023_ROI1_inter	4344	Female	4 month	Interfibrillar	CypD	no change
4344_S047_ROI1_peri	4344	Female	4 month	Perinuclear	CypD	no change
4344_S061_ROI1_inter	4344	Female	4 month	Interfibrillar	CypD	no change
4298_S015_ROI1_inter	4298	Female	4 month	Interfibrillar	CypDN30	no change
4298_S019_ROI1_inter	4298	Female	4 month	Interfibrillar	CypDN30	no change
4298_S023_ROI1_inter	4298	Female	4 month	Interfibrillar	CypDN30	no change
4298_S023_ROI2_inter	4298	Female	4 month	Interfibrillar	CypDN30	no change
4298_S029_ROI1_peri	4298	Female	4 month	Perinuclear	CypDN30	no change
4298_S031_ROI1_peri	4298	Female	4 month	Perinuclear	CypDN30	no change
4298_S034_ROI1_inter	4298	Female	4 month	Interfibrillar	CypDN30	no change
4298_S039_ROI1_peri	4298	Female	4 month	Perinuclear	CypDN30	no change
4296_S002_ROI1_peri	4296	Female	4 month	Perinuclear	CypDN30	increase
4296_S035_ROI1_peri	4296	Female	4 month	Perinuclear	CypDN30	no change
4296_S035_ROI2_peri	4296	Female	4 month	Perinuclear	CypDN30	no change
4296_S035_ROI3_peri	4296	Female	4 month	Interfibrillar	CypDN30	no change
4296_S035_ROI4_peri	4296	Female	4 month	Interfibrillar	CypDN30	no change
4335_S016_ROI1_peri	4335	Male	5 month	Perinuclear	CypDN30	no change
4335_S021_ROI1_inter	4335	Male	5 month	Interfibrillar	CypDN30	no change
4335_S021_ROI2_inter	4335	Male	5 month	Interfibrillar	CypDN30	no change
4335_S021_ROI3_inter	4335	Male	5 month	Interfibrillar	CypDN30	no change
4392_S011_ROI1_inter	4392	Male	5 month	Interfibrillar	CypDN30	no change
4392_S014_ROI1_inter	4392	Male	5 month	Interfibrillar	CypDN30	no change
4392_S014_ROI2_inter	4392	Male	5 month	Interfibrillar	CypDN30	no change
4392_S014_ROI3_inter	4392	Male	5 month	Interfibrillar	CypDN30	no change
4542_S002_ROI1_peri	4542	Male	6 month	Perinuclear	CypDN30	no change
4542_S015_ROI1_peri	4542	Male	6 month	Perinuclear	CypDN30	no change
4542_S019_ROI1_inter	4542	Male	6 month	Interfibrillar	CypDN30	no change
4542_S019_ROI2_inter	4542	Male	6 month	Interfibrillar	CypDN30	no change
4513_S011_ROI1_peri	4513	Female	6 month	Perinuclear	CypDN30	no change
4513_S016_ROI1_inter	4513	Female	6 month	Interfibrillar	CypDN30	no change
4513_S016_ROI2_inter	4513	Female	6 month	Interfibrillar	CypDN30	no change
4513_S034_ROI1_peri	4513	Female	6 month	Perinuclear	CypDN30	no change
4513_S035_ROI1_peri	4513	Female	6 month	Perinuclear	CypDN30	no change
4513_S036_ROI1_inter	4513	Female	6 month	Interfibrillar	CypDN30	no change
4520_S007_ROI1_peri	4520	Male	6 month	Perinuclear	CypDN30	no change
4520_S010_ROI1_inter	4520	Male	6 month	Interfibrillar	CypDN30	no change
4520_S014_ROI1_peri	4520	Male	6 month	Perinuclear	CypDN30	no change
4520_S020_ROI1_peri	4520	Male	6 month	Perinuclear	CypDN30	no change
4520_S029_ROI1_peri	4520	Male	6 month	Perinuclear	CypDN30	no change
4520_S032_ROI1_peri	4520	Male	6 month	Perinuclear	CypDN30	no change
4520_S033_ROI1_inter	4520	Male	6 month	Interfibrillar	CypDN30	no change
4520_S034_ROI1_peri	4520	Male	6 month	Perinuclear	CypDN30	no change
4520_S034_ROI2_inter	4520	Male	6 month	Interfibrillar	CypDN30	no change
4520_S038_ROI1_inter	4520	Male	6 month	Interfibrillar	CypDN30	no change
4520_S040_ROI1_inter	4520	Male	6 month	Interfibrillar	CypDN30	no change
4520_S040_ROI2_inter	4520	Male	6 month	Interfibrillar	CypDN30	no change
4520_S042_ROI1_inter	4520	Male	6 month	Interfibrillar	CypDN30	no change
4520_S042_ROI2_inter	4520	Male	6 month	Interfibrillar	CypDN30	no change
4520_S044_ROI1_peri	4520	Male	6 month	Perinuclear	CypDN30	no change
4520_S044_ROI2_inter	4520	Male	6 month	Interfibrillar	CypDN30	no change
4547_S020_ROI1_peri	4547	Male	6 month	Perinuclear	CypDN30	no change
4547_S023_ROI1_peri	4547	Male	6 month	Perinuclear	CypDN30	no change
4547_S027_ROI1_peri	4547	Male	6 month	Perinuclear	CypDN30	no change
4547_S028_ROI1_inter	4547	Male	6 month	Interfibrillar	CypDN30	no change
4547_S028_ROI2_inter	4547	Male	6 month	Interfibrillar	CypDN30	no change
4547_S029_ROI1_peri	4547	Male	6 month	Perinuclear	CypDN30	no change
4547_S034_ROI1_inter	4547	Male	6 month	Interfibrillar	CypDN30	no change
4547_S034_ROI2_inter	4547	Male	6 month	Interfibrillar	CypDN30	no change
4547_S040_ROI1_inter	4547	Male	6 month	Interfibrillar	CypDN30	no change
4547_S046_ROI1_inter	4547	Male	6 month	Interfibrillar	CypDN30	no change
4547_S046_ROI2_inter	4547	Male	6 month	Interfibrillar	CypDN30	no change
