# Supplementary material for: Butyrate Feeding Reverses CypD-Related Mitoflash Phenotypes in Mouse Myofibers
Source: Int J Mol Sci. 2021 Jul 10;22(14):7412. doi: 10.3390/ijms22147412 (PMC8304904; doi:10.3390/ijms22147412)
Supplement: Supplementary file 1 [file ijms-22-07412-s001.zip › Spreadsheet S2.xlsx]

## Sheet: Averaged per recording_CypDjR
Recording	Mice	Gender	Age	Imaging	numEvents	frequency (Hz)	amp (df/F0)	Area	Area2D (pixel)	Half Rise Time (s)	Half Decay Time (s)	FWHM	AmpxArea	AmpxArea2D	Total Area2D (pixel)	Total Area (pixel)	Mitochondria area (pixel)	2D area ratio
031819_S005	3028	Male	6 month	40x Water	17	0.142236	0.617751	13067.2	2212.53	1.54973	2.07473	3.25849	8072.3	1366.79	37613	222143	107775	0.348996
031819_S023	3028	Male	6 month	40x Water	16	0.133869	0.669875	6475.06	1199.06	1.39312	2.77502	4.02894	4337.48	803.222	19185	103601	103218	0.185869
090620_S015	4295	Female	4 month	40x Water	27	0.225904	0.460495	7458.48	1075.78	1.31655	2.87658	4.19312	3434.59	495.39	29046	201379	189865	0.152982
090620_S007	4295	Female	4 month	40x Water	20	0.167336	0.605537	13918.8	1191.3	2.1303	3.06816	5.21646	8428.32	721.376	23826	278375	136401	0.174676
090620_S016	4295	Female	4 month	40x Water	24	0.200803	0.64844	2022.12	360.75	1.72347	2.74346	4.46693	1311.23	233.925	8658	48531	147899	0.0585399
091320_S005	4344	Female	4 month	40x Water	25	0.20917	0.845833	4951.04	908.6	3.432	3.32919	6.7229	4187.75	768.524	22715	123776	138550	0.163948
091320_S009	4344	Female	4 month	40x Water	19	0.158969	0.537304	4101.37	824.579	2.07094	2.62804	4.69898	2203.68	443.05	15667	77926	145166	0.107925
091320_S023	4344	Female	4 month	40x Water	28	0.23427	0.565105	5053.14	996.964	0.915852	2.29045	3.2063	2855.56	563.39	27915	141488	151439	0.184332
091320_S042	4344	Female	4 month	40x Water	16	0.133869	0.476353	14589.7	2281.75	0.823566	2.70083	3.5244	6949.83	1086.92	36508	233435	131155	0.278358
091320_S061	4344	Female	4 month	40x Water	19	0.158969	0.533997	9085.21	1564.58	1.40428	3.06024	4.46452	4851.48	835.481	29727	172619	133938	0.221946
011121_S009	4419	Male	4 month	40x Water	20	0.167336	0.573902	9508.1	1053.8	1.48051	4.74843	6.22894	5456.71	604.777	21076	190162	139252	0.151352
011121_S019	4419	Male	4 month	40x Water	20	0.167336	0.530036	7694.6	1134.45	2.65418	3.74708	6.40125	4078.41	601.299	22689	153892	121669	0.186481
011121_S026	4419	Male	4 month	40x Water	11	0.0920348	0.727736	16729.7	1626.73	2.85146	3.90144	6.7529	12174.8	1183.83	17894	184027	124135	0.14415
011121_S031	4419	Male	4 month	40x Water	25	0.20917	0.618591	9188.88	1221.04	1.36155	4.20178	5.56787	5684.16	755.325	30526	229722	109815	0.277977
011121_S036	4419	Male	4 month	40x Water	24	0.200803	0.413191	5440.83	926.5	1.12237	2.75315	3.89052	2248.1	382.822	22236	130580	137942	0.161198
011121_S038	4419	Male	4 month	40x Water	17	0.142236	0.390222	4849.71	884.882	1.25636	3.78197	5.03833	1892.46	345.3	15043	82445	138311	0.108762
011921_S013	4418	Male	4 month	40x Water	13	0.108768	0.587769	8258.69	1541.23	2.8802	2.71308	5.59328	4854.21	905.888	20036	107363	136065	0.147253
011921_S014	4418	Male	4 month	40x Water	28	0.23427	0.580427	8990.5	1619.57	1.59284	2.20989	3.80273	5218.33	940.043	45348	251734	144133	0.314626

## Sheet: Individual mitoflash_CypDjR
Recording	Mice	Imaging	Area								Area 2D (pixel)							ID					Length						amp (df/F0)	PeakFrame	Half Rise Time	Half Decay Time	FWHM	Peak Time
031819_S005	3028	40x Water 2.78Hz	3429	[19.5000000000000,474.500000000000,218.500000000000,39,71,6]	3429x3 double	3429x1 uint16	[34.9320530965456,512.679872522863,221.247110599874]	11678.6	65535	1020x2 double	1020	1x60 double	1x60 double	41789	11367	[290.317738669805,919.645057293883,217.351239366233]	729x1 uint16	3	1.07556	3.26089	2.45807	1x60 double	60	TRUE	TRUE	[]	8273.53	1x60 double	0.527878	229	0.719346	1.68566	2.40501	82.26
031819_S005	3028	40x Water 2.78Hz	2108	[6.50000000000000,623.500000000000,71.5000000000000,30,40,7]	2108x3 double	2108x1 uint16	[17.1613964166615,644.726760027057,75.4428680337496]	11513.6	45511	609x2 double	609	1x60 double	1x60 double	21533	7751.03	[293.328629874976,534.212187420185,71.2562728365971]	246x1 uint16	10	1.07534	5.11455	5.91081	1x60 double	60	TRUE	TRUE	[]	8579.56	1x60 double	0.366379	77	1.47658	1.42019	2.89677	27.54
031819_S005	3028	40x Water 2.78Hz	4670	[82.5000000000000,511.500000000000,261.500000000000,34,31,11]	4670x3 double	4670x1 uint16	[100.082192961183,525.846537309455,267.141588865795]	5037.32	31289	653x2 double	653	1x60 double	1x60 double	16705	7280.78	[294.410856315995,400.570235447706,248.481856888972]	99x1 uint16	18	1.13434	1.71511	4.68509	1x60 double	60	TRUE	TRUE	[]	3423.4	1x60 double	0.584006	267	0.64096	2.08635	2.72731	95.94
031819_S005	3028	40x Water 2.78Hz	31365	[92.5000000000000,22.5000000000000,290.500000000000,86,133,12]	31365x3 double	31365x1 uint16	[139.168192092554,85.8117853817024,296.786701850161]	6652.98	42667	5748x2 double	5748	1x52 double	1x52 double	16575	6696.66	[293.926915484874,735.035066474407,276.921229344869]	64x1 uint16	19	1.01382	1.20208	4.12828	1x52 double	52	TRUE	FALSE	[]	4355.32	1x52 double	0.50345	297	1.17665	1.42026	2.59691	106.74
031819_S005	3028	40x Water 2.78Hz	3171	[22.5000000000000,479.500000000000,19.5000000000000,43,57,6]	3171x3 double	3171x1 uint16	[37.0152550482862,510.893770939083,21.3576372580572]	7589.2	51200	1040x2 double	1040	1x60 double	1x60 double	15234	4834.03	[37.6808454964668,512.122416463551,21.1015503077952]	3171x1 uint16	24	1.07454	16.3134	-0.231337	1x60 double	60	TRUE	TRUE	[]	5953.73	1x60 double	1.11403	57	4.70149	[]	[]	20.34
031819_S005	3028	40x Water 2.78Hz	1275	[70.5000000000000,720.500000000000,77.5000000000000,38,28,6]	1275x3 double	1275x1 uint16	[88.6086251085759,735.678348523788,80.6401866244268]	5784.33	31289	405x2 double	405	1x60 double	1x60 double	11746	6842.74	[293.789596200351,576.279190660937,74.6254353763983]	42x1 uint16	45	1.2115	3.5403	4.23287	1x60 double	60	TRUE	TRUE	[]	3974.8	1x60 double	0.471753	80	0.904039	1.44855	2.35259	28.62
031819_S005	3028	40x Water 2.78Hz	24847	[142.500000000000,670.500000000000,24.5000000000000,73,135,10]	24847x3 double	24847x1 uint16	[184.255034811737,733.306612662390,30.0271470080119]	6051.08	51200	4720x2 double	4720	1x60 double	1x60 double	6244	3609.5	[277.808656643260,740.235308534103,25.1248414973308]	26x1 uint16	113	1.09565	1.38926	4.8742	1x60 double	60	TRUE	FALSE	[]	4010.74	1x60 double	0.524378	30	0.981788	1.3557	2.33749	10.62
031819_S005	3028	40x Water 2.78Hz	37162	[139.500000000000,672.500000000000,73.5000000000000,77,150,11]	37162x3 double	37162x1 uint16	[183.723401232079,744.107336710810,79.1397363769425]	6251.76	48356	6153x2 double	6153	1x60 double	1x60 double	5844	3711.41	[286.826924905696,927.947982375503,72.1884489808857]	17x1 uint16	121	1.01138	2.75637	5.28618	1x60 double	60	TRUE	TRUE	[]	3952.13	1x60 double	0.57174	80	1.41893	1.3552	2.77414	28.62
031819_S005	3028	40x Water 2.78Hz	23313	[57.5000000000000,755.500000000000,262.500000000000,67,64,16]	23313x3 double	23313x1 uint16	[94.1281008697035,787.378335730350,270.612400629402]	6060.67	42667	2412x2 double	2412	1x60 double	1x60 double	5503	2902.21	[199.613056016779,726.417203280858,249.027215640254]	138x1 uint16	132	1.0216	3.65344	6.26844	1x60 double	60	TRUE	FALSE	[]	3767.42	1x60 double	0.623521	273	2.34693	3.79482	6.14175	98.1
031819_S005	3028	40x Water 2.78Hz	3160	[211.500000000000,61.5000000000000,213.500000000000,48,49,7]	3160x3 double	3160x1 uint16	[234.171661928126,84.1008067139608,217.229421109530]	4888.21	31289	942x2 double	942	1x60 double	1x60 double	5173	2596.82	[293.608629441624,480.394801330299,201.813092945913]	22x1 uint16	137	1.3116	3.54411	4.40605	1x60 double	60	TRUE	FALSE	[]	3414.75	1x60 double	0.406752	217	0.944996	1.09766	2.04266	77.94
031819_S005	3028	40x Water 2.78Hz	1340	[0.500000000000000,967.500000000000,47.5000000000000,8,26,10]	1340x3 double	1340x1 uint16	[2.74532875969200,978.777873566182,52.5462149886450]	7235.93	45511	173x2 double	173	1x60 double	1x60 double	5127	3241.23	[276.702510207565,616.597152384829,46.2074531633604]	47x1 uint16	142	1.01056	1.73503	5.99738	1x60 double	60	TRUE	TRUE	[]	3419.54	1x60 double	1.1155	52	1.17916	3.50181	4.68096	18.54
031819_S005	3028	40x Water 2.78Hz	1178	[86.5000000000000,692.500000000000,78.5000000000000,24,36,5]	1178x3 double	1178x1 uint16	[101.007800191979,713.313385648354,81.1083574552639]	6818.43	28444	402x2 double	402	1x60 double	1x60 double	5041	4126	[278.532052835676,897.509088705768,74.5612578768783]	[3369;3366;3763;3984;4298;4413;4774;5041]	147	1.03932	4.57432	5.68779	1x60 double	60	TRUE	TRUE	[]	4874.73	1x60 double	0.328028	81	1.21091	2.61001	3.82092	28.98
031819_S005	3028	40x Water 2.78Hz	210	[31.5000000000000,462.500000000000,19.5000000000000,8,11,5]	210x3 double	210x1 uint16	[36.2811139200582,467.924719016776,21.6113712132545]	8817.25	28444	65x2 double	65	1x60 double	1x60 double	4824	2795.82	[36.2610219664363,468.063550567769,21.4893148454412]	210x1 uint16	156	1.04817	20.9739	-0.517142	1x60 double	60	TRUE	TRUE	[]	6169.74	1x60 double	0.971706	48	2.2716	[]	[]	17.1
031819_S005	3028	40x Water 2.78Hz	598	[90.5000000000000,748.500000000000,76.5000000000000,17,12,6]	598x3 double	598x1 uint16	[99.7740707813770,754.407424584628,79.6961037353745]	7809.81	28444	150x2 double	150	1x60 double	1x60 double	2960	2948.5	[281.501950144141,87,73]	[2937;2960]	226	1.25264	2.20043	3.96636	1x60 double	60	TRUE	TRUE	[]	5195.37	1x60 double	0.55479	79	0.59294	1.79996	2.3929	28.26
031819_S005	3028	40x Water 2.78Hz	42505	[5.50000000000000,893.500000000000,32.5000000000000,113,118,13]	42505x3 double	42505x1 uint16	[52.6555146748612,958.628554802403,38.5021427565526]	5334.77	51200	6169x2 double	6169	1x60 double	1x60 double	2958	2958	[117,666,31]	2958	227	1.09897	1.31278	5.03054	1x60 double	60	TRUE	FALSE	[]	3336.51	1x60 double	0.638712	38	1.05252	2.06733	3.11985	13.5
031819_S005	3028	40x Water 2.78Hz	30767	[1.50000000000000,458.500000000000,41.5000000000000,79,157,18]	30767x3 double	30767x1 uint16	[34.6929958560899,526.577901576504,49.0643439841846]	8655.84	65535	4158x2 double	4158	1x60 double	1x60 double	2213	1978.8	[269.845360824742,876.428340408328,39.5947038609258]	[1913;2097;1530;2213;2141]	257	1.05138	32.3441	-2.05663	1x60 double	60	TRUE	TRUE	[]	5111.78	1x60 double	0.832666	76	2.79964	[]	[]	27.18
031819_S005	3028	40x Water 2.78Hz	11045	[12.5000000000000,477.500000000000,71.5000000000000,54,144,13]	11045x3 double	11045x1 uint16	[34.6794631659552,540.722482721705,75.1850079644158]	10027.5	65535	2794x2 double	2794	1x60 double	1x60 double	898	898	[94,897,68]	898	299	1.071	10.5481	5.13933	1x60 double	60	TRUE	TRUE	[]	7817.19	1x60 double	0.366482	77	1.92691	3.40266	5.32958	27.54
031819_S023	3028	40x Water 2.78Hz	82734	[107.500000000000,412.500000000000,53.5000000000000,135,201,33]	82734x3 double	82734x1 uint16	[159.896934861184,519.889696732848,79.7634218266080]	13734.5	65535	13688x2 double	13688	1x60 double	1x60 double	37943	4851.24	[161.445318034366,514.180828683885,79.5793294051789]	82734x1 uint16	1	1.01004	4.41046	6.55562	1x60 double	60	TRUE	FALSE	[]	8136.97	1x60 double	0.5314	81	1.75323	3.67884	5.43207	28.98
031819_S023	3028	40x Water 2.78Hz	9099	[257.500000000000,4.50000000000000,90.5000000000000,40,96,21]	9099x3 double	9099x1 uint16	[273.799006159244,64.4515171400175,102.552748887569]	2388.95	28445	1844x2 double	1844	1x60 double	1x60 double	19946	6585.85	[292.949319869541,730.664066433371,94.7892505733981]	171x1 uint16	5	1.17315	1.39316	4.33045	1x60 double	60	TRUE	FALSE	[]	1535.06	1x60 double	0.739466	102	0.875752	2.47491	3.35066	36.54
031819_S023	3028	40x Water 2.78Hz	208	[155.500000000000,425.500000000000,254.500000000000,11,10,5]	208x3 double	208x1 uint16	[160.387608447853,431.240191679976,256.696935390817]	6183.18	22775	77x2 double	77	1x60 double	1x60 double	12575	6003.26	[23.8780196877095,939.052351499383,257.407221074257]	168x1 uint16	10	1.0462	4.13915	5.00203	1x60 double	60	TRUE	TRUE	[]	4180.26	1x60 double	0.45846	256	0.312576	0.921642	1.23422	91.98
031819_S023	3028	40x Water 2.78Hz	6375	[153.500000000000,739.500000000000,77.5000000000000,33,88,7]	6375x3 double	6375x1 uint16	[170.147680261049,782.711743132551,80.7762568085476]	11419.6	62579	1597x2 double	1597	1x60 double	1x60 double	8848	4286.3	[170.356832703719,782.016141372286,80.7915696895897]	6375x1 uint16	22	1.06089	1.43385	3.1193	1x60 double	60	TRUE	FALSE	[]	7235.35	1x60 double	0.614588	79	0.205107	1.61404	1.81914	28.26
031819_S023	3028	40x Water 2.78Hz	1766	[137.500000000000,444.500000000000,253.500000000000,35,54,6]	1766x3 double	1766x1 uint16	[150.644675366619,472.030674971431,256.758187314131]	18816.4	65380	627x2 double	627	1x60 double	1x60 double	8353	4348.29	[30.2766327619781,900.125441515037,256.015758305982]	92x1 uint16	27	1.05601	4.01878	5.96403	1x60 double	60	TRUE	TRUE	[]	12371	1x60 double	0.49848	257	1.42855	3.63411	5.06266	92.34
031819_S023	3028	40x Water 2.78Hz	141	[148.500000000000,503.500000000000,254.500000000000,8,21,3]	141x3 double	141x1 uint16	[153.167643964868,513.948381240446,256.128554939215]	13032.3	39868	82x2 double	82	1x60 double	1x60 double	7418	4005.41	[28.5895150668485,300.045049083628,257.544206334323]	225x1 uint16	30	1.05916	4.11346	5.97009	1x60 double	60	TRUE	TRUE	[]	8882.46	1x60 double	0.511135	257	1.37994	1.40288	2.78282	92.34
031819_S023	3028	40x Water 2.78Hz	609	[120.500000000000,550.500000000000,278.500000000000,11,11,10]	609x3 double	609x1 uint16	[126.863787165932,555.722224362045,283.839472798582]	11041.6	39823	92x2 double	92	1x60 double	1x60 double	6472	3443.67	[22.9395651698598,9.49626595424854,281.281587362322]	85x1 uint16	35	1.01669	22.9502	4.41651	1x60 double	60	TRUE	TRUE	[]	5597.61	1x60 double	0.98799	284	1.57903	4.67287	6.2519	102.06
031819_S023	3028	40x Water 2.78Hz	387	[240.500000000000,411.500000000000,80.5000000000000,13,12,6]	387x3 double	387x1 uint16	[247.375564418865,417.455641543768,83.0305759505724]	4884.86	25621	126x2 double	126	1x60 double	1x60 double	5885	3358.31	[247.135833255749,418.065192853246,82.9697453270723]	387x1 uint16	36	1.3251	3.57451	4.55498	1x60 double	60	TRUE	TRUE	[]	3751.97	1x60 double	0.409554	83	0.620033	0.573486	1.19352	29.7
031819_S023	3028	40x Water 2.78Hz	605	[192.500000000000,584.500000000000,76.5000000000000,18,18,6]	605x3 double	605x1 uint16	[201.957137022501,592.347804276591,79.3066694980702]	7713.57	34127	169x2 double	169	1x60 double	1x60 double	4836	3083.63	[201.388439196675,592.375081006241,79.3478334281198]	605x1 uint16	48	1.01998	5.72569	5.69231	1x60 double	60	TRUE	TRUE	[]	5037.91	1x60 double	0.489846	80	1.56496	1.59628	3.16123	28.62
031819_S023	3028	40x Water 2.78Hz	228	[215.500000000000,404.500000000000,80.5000000000000,14,7,6]	228x3 double	228x1 uint16	[220.999819901994,407.829500053313,83.6123045466234]	4895	28446	75x2 double	75	1x60 double	1x60 double	4625	2899.42	[221.460564511615,408.000694332042,83.5780079780113]	228x1 uint16	50	1.14376	3.53716	4.74303	1x60 double	60	TRUE	TRUE	[]	2999.47	1x60 double	0.658384	84	1.38079	0.791011	2.1718	30.06
031819_S023	3028	40x Water 2.78Hz	318	[166.500000000000,498.500000000000,254.500000000000,11,17,4]	318x3 double	318x1 uint16	[171.668056138592,505.675832596882,256.421801805619]	17514.2	56921	114x2 double	114	1x60 double	1x60 double	4560	3011.71	[160.698083600054,430.935030769354,256.529706992745]	208x1 uint16	51	1.02147	6.84706	6.26442	1x60 double	60	TRUE	TRUE	[]	10655.7	1x60 double	0.636699	257	1.31489	3.68199	4.99688	92.34
031819_S023	3028	40x Water 2.78Hz	301	[169.500000000000,496.500000000000,19.5000000000000,10,39,2]	301x3 double	301x1 uint16	[173.809873086582,517.065559907804,20.1966005916265]	8564.71	42656	230x2 double	230	1x60 double	1x60 double	4163	2621.64	[174.585136513689,517.573650228420,20.1867775926196]	301x1 uint16	60	1.20653	7.96131	4.54837	1x60 double	60	TRUE	TRUE	[]	4470.19	1x60 double	1.06467	22	3.48116	[]	[]	7.74
031819_S023	3028	40x Water 2.78Hz	171	[145.500000000000,466.500000000000,19.5000000000000,12,19,1]	171x3 double	171x1 uint16	[150.298936945680,475.602698033933,20]	15836.5	56865	171x2 double	171	1x60 double	1x60 double	3799	2699.3	[151.173261406473,476.633415659257,20]	171x1 uint16	69	1.00996	7.26038	5.06443	1x60 double	60	TRUE	TRUE	[]	8953.11	1x60 double	0.817186	19	2.80392	12.2188	15.0227	6.66
031819_S023	3028	40x Water 2.78Hz	123	[199.500000000000,414.500000000000,77.5000000000000,11,10,6]	123x3 double	123x1 uint16	[205.800070544350,419.056768678309,81.1549489724864]	6246.43	19924	51x2 double	51	1x60 double	1x60 double	3714	2642.15	[204.554207117252,419.885927042787,80.6274566518455]	123x1 uint16	71	1.18093	5.41443	5.04757	1x60 double	60	TRUE	TRUE	[]	3301.02	1x60 double	1.01094	82	2.02397	1.28741	3.31138	29.34
031819_S023	3028	40x Water 2.78Hz	433	[166.500000000000,793.500000000000,245.500000000000,22,15,4]	433x3 double	433x1 uint16	[172.559171040848,800.560511098533,247.789130438253]	13020.4	45538	193x2 double	193	1x60 double	1x60 double	3068	2282.54	[15.7421224682371,124.804940518316,246.441579887440]	13x1 uint16	85	1.93522	2.45872	2.70659	1x60 double	60	TRUE	FALSE	[]	7858.12	1x60 double	0.789221	247	0.311775	0.485337	0.797112	88.74
031819_S023	3028	40x Water 2.78Hz	103	[166.500000000000,471.500000000000,254.500000000000,8,9,3]	103x3 double	103x1 uint16	[170.775438822866,475.476316541088,256.319530607777]	13393.1	34129	49x2 double	49	1x60 double	1x60 double	2937	2540.63	[153.236259487646,513.790315691918,256.141412336801]	141x1 uint16	91	1.03851	5.04982	5.94723	1x60 double	60	TRUE	TRUE	[]	8822.47	1x60 double	0.49999	257	1.25427	2.59173	3.846	92.34
090620_S015	4295	40x Water 2.78Hz	11053	[20.5000000000000,396.500000000000,19.5000000000000,66,48,14]	11053x3 double	11053x1 uint16	[48.8270920834363,420.621501429429,25.2148378216214]	6562.24	38400	1939x2 double	1939	1x60 double	1x60 double	36891	12053.4	[48.4355489817530,421.604285191489,25.1863082810884]	11053x1 uint16	11	1.10005	2.2527	5.60433	1x60 double	60	TRUE	TRUE	[]	4580.01	1x60 double	0.433266	26	1.48926	2.79105	4.2803	9.18
090620_S015	4295	40x Water 2.78Hz	4082	[6.50000000000000,729.500000000000,169.500000000000,42,27,11]	4082x3 double	4082x1 uint16	[26.3523242630386,745.432256235828,174.835600907030]	4425.12	28160	758x2 double	758	1x60 double	1x60 double	36023	11395.1	[7.36280526557914,967.098646377347,168.137711635126]	223x1 uint16	14	1.11905	3.04282	2.88936	1x60 double	60	TRUE	TRUE	[]	3188.18	1x60 double	0.348517	172	0.260881	3.58676	3.84765	61.74
090620_S015	4295	40x Water 2.78Hz	5056	[29.5000000000000,365.500000000000,254.500000000000,32,28,15]	5056x3 double	5056x1 uint16	[42.5860393761186,379.726668371261,260.105407824086]	7921.01	48640	634x2 double	634	1x60 double	1x60 double	21979	8943.64	[6.40570128392063,874.684829028751,245.980423937429]	246x1 uint16	41	1.02899	222.36	-2.46479	1x60 double	60	TRUE	TRUE	[]	5071.55	1x60 double	0.512739	267	4.185	12.3879	16.5729	95.94
090620_S015	4295	40x Water 2.78Hz	4659	[0.500000000000000,163.500000000000,196.500000000000,27,46,12]	4659x3 double	4659x1 uint16	[6.87303886072894,186.256396331161,202.688631426503]	9105.89	40960	646x2 double	646	1x60 double	1x60 double	17915	6237.21	[293.683193315805,989.523381012489,197.879594984091]	441x1 uint16	54	1.12634	6.53258	4.73031	1x60 double	60	TRUE	TRUE	[]	6257.34	1x60 double	0.505383	205	2.14932	4.17724	6.32656	73.62
090620_S015	4295	40x Water 2.78Hz	3050	[218.500000000000,511.500000000000,45.5000000000000,43,28,8]	3050x3 double	3050x1 uint16	[241.202993609149,527.113521695257,49.0457450386815]	4990.74	28160	713x2 double	713	1x60 double	1x60 double	15091	9503.72	[6.21765514789121,791.246877811965,46.5127227801805]	58x1 uint16	78	1.11043	0.88616	4.73757	1x60 double	60	TRUE	TRUE	[]	3360.67	1x60 double	0.491453	48	0.684837	2.42237	3.10721	17.1
090620_S015	4295	40x Water 2.78Hz	2918	[8.50000000000000,77.5000000000000,204.500000000000,48,28,9]	2918x3 double	2918x1 uint16	[30.5526901426888,91.0306322817123,207.716847754942]	6701.8	33280	648x2 double	648	1x60 double	1x60 double	14092	5201.65	[295.037253563773,954.639404804245,199.300621918045]	100x1 uint16	91	1.01026	1.8511	3.32741	1x60 double	60	TRUE	TRUE	[]	5060.74	1x60 double	0.376269	206	0.364696	1.99831	2.363	73.98
090620_S015	4295	40x Water 2.78Hz	55840	[191.500000000000,569.500000000000,81.5000000000000,109,116,22]	55840x3 double	55840x1 uint16	[264.994290989939,620.960432603535,92.4035026566681]	4866.38	33280	5284x2 double	5284	1x60 double	1x60 double	10056	5593.88	[1.68579736374164,545.045848177843,83.2105510450746]	113x1 uint16	141	1.02801	5.64791	6.24932	1x60 double	60	TRUE	TRUE	[]	2968.42	1x60 double	0.664926	95	2.65485	5.28745	7.9423	34.02
090620_S015	4295	40x Water 2.78Hz	794	[29.5000000000000,537.500000000000,25.5000000000000,14,14,11]	794x3 double	794x1 uint16	[36.2723236309817,543.764183522447,31.8505180069068]	6535.42	30720	134x2 double	134	1x60 double	1x60 double	9940	7146.93	[9.18327674340510,926.731260027611,27.1911309279505]	15x1 uint16	143	1.05517	5.62173	4.9085	1x60 double	60	TRUE	TRUE	[]	4661.49	1x60 double	0.409836	36	2.52	1.90154	4.42154	12.78
090620_S015	4295	40x Water 2.78Hz	1140	[127.500000000000,407.500000000000,271.500000000000,28,17,7]	1140x3 double	1140x1 uint16	[143.982726938626,416.658213891952,274.930172730614]	6110.32	28160	264x2 double	264	1x60 double	1x60 double	9424	5978.74	[61.8327219286310,365.992274124802,267.185315762965]	89x1 uint16	149	1.13333	1.8743	4.71242	1x60 double	60	TRUE	TRUE	[]	4528.48	1x60 double	0.368308	274	0.843357	2.38667	3.23002	98.46
090620_S015	4295	40x Water 2.78Hz	704	[32.5000000000000,139.500000000000,278.500000000000,21,16,6]	704x3 double	704x1 uint16	[42.1238421955403,147.544768439108,281.055574614065]	10600	46080	213x2 double	213	1x60 double	1x60 double	9415	6209.58	[298.095534347047,375.719197278681,268.360001243128]	57x1 uint16	150	1.35075	2.67056	2.73204	1x60 double	60	TRUE	TRUE	[]	7956.43	1x60 double	0.608761	280	0.323839	0.786	1.10984	100.62
090620_S015	4295	40x Water 2.78Hz	1249	[34.5000000000000,370.500000000000,21.5000000000000,20,21,9]	1249x3 double	1249x1 uint16	[42.6396508728180,382.265897755611,25.1876558603491]	6575.24	30720	271x2 double	271	1x60 double	1x60 double	7952	5451.36	[287.138088885183,887.510322688235,22.1901942799967]	22x1 uint16	189	1.05622	5.37817	5.44867	1x60 double	60	TRUE	TRUE	[]	5034.98	1x60 double	0.277674	26	1.41545	1.16727	2.58273	9.18
090620_S015	4295	40x Water 2.78Hz	1243	[220.500000000000,170.500000000000,296.500000000000,21,25,9]	1243x3 double	1243x1 uint16	[231.237809187279,183.005300353357,301.828268551237]	5828.48	23040	282x2 double	282	1x47 double	1x47 double	7084	3828.48	[219.804264699498,55.4768006439504,288.974977761198]	355x1 uint16	221	1.05405	5.2284	2.55556	1x47 double	47	TRUE	TRUE	[]	4566.24	1x47 double	0.28827	302	0.905	1.15941	2.06441	108.54
090620_S015	4295	40x Water 2.78Hz	32168	[224.500000000000,380.500000000000,116.500000000000,76,99,13]	32168x3 double	32168x1 uint16	[273.340278619019,430.735608048994,123.266235951275]	5912.56	38400	4665x2 double	4665	1x60 double	1x60 double	6150	3453.07	[294.147694599011,1018.50131353040,111.663157023768]	14x1 uint16	257	1.08454	1.31241	5.69735	1x60 double	60	TRUE	TRUE	[]	4118.5	1x60 double	0.449167	123	1.26181	2.7519	4.01371	44.1
090620_S015	4295	40x Water 2.78Hz	795	[31.5000000000000,136.500000000000,95.5000000000000,22,23,7]	795x3 double	795x1 uint16	[39.5164985001364,149.454322334333,98.7463866921189]	11808.2	43520	256x2 double	256	1x60 double	1x60 double	6025	5409.5	[109.747481282928,649.242120343840,90.2269156114244]	[5464;6025;5239;4910]	266	1.05398	2.53763	2.87062	1x60 double	60	TRUE	TRUE	[]	8440	1x60 double	0.432464	97	0.161029	1.13087	1.2919	34.74
090620_S015	4295	40x Water 2.78Hz	340	[35.5000000000000,181.500000000000,98.5000000000000,8,10,9]	340x3 double	340x1 uint16	[39.2416212003118,186.025720966485,102.767731878410]	9660.24	38400	62x2 double	62	1x60 double	1x60 double	5724	5319.43	[47.4088516489419,215.569771189172,93.4399505854549]	[5487;5303;5035;5029;5498;5724;5160]	281	1.03448	5.62668	5.03333	1x60 double	60	TRUE	TRUE	[]	6358.71	1x60 double	0.649351	107	2.74909	3.96	6.70909	38.34
090620_S015	4295	40x Water 2.78Hz	1139	[154.500000000000,446.500000000000,285.500000000000,18,18,7]	1139x3 double	1139x1 uint16	[162.085473870682,454.399911426041,288.965013286094]	5075.05	28160	231x2 double	231	1x60 double	1x60 double	5371	4850.33	[50.8308363686345,995.339529929215,274.805133667789]	[4794;5010;4923;5371;4871;4133]	296	1.02867	2.56637	4.17073	1x60 double	60	TRUE	TRUE	[]	3690.39	1x60 double	0.426426	289	0.889859	0.331948	1.22181	103.86
090620_S015	4295	40x Water 2.78Hz	8008	[257.500000000000,703.500000000000,295.500000000000,41,54,13]	8008x3 double	8008x1 uint16	[276.422752192982,729.303344298246,300.208168859649]	5830.97	33280	1409x2 double	1409	1x49 double	1x49 double	5220	4775.05	[257.552402592643,81.6463073685092,282.906901498414]	20x1 uint16	302	1.16756	1.92689	3.0884	1x49 double	49	TRUE	TRUE	[]	4160.68	1x49 double	0.437118	300	0.833242	1.30078	2.13402	107.82
090620_S015	4295	40x Water 2.78Hz	776	[0.500000000000000,415.500000000000,20.5000000000000,16,16,10]	776x3 double	776x1 uint16	[6.79803210771621,421.832211289487,24.7664422578975]	6370.31	23040	155x2 double	155	1x60 double	1x60 double	4981	3544.23	[293.941291372762,969.589256646772,20.5108193163321]	13x1 uint16	310	1.22727	5.29316	4.52778	1x60 double	60	TRUE	TRUE	[]	4624.52	1x60 double	0.521429	25	0.336923	1.06839	1.40531	8.82
090620_S015	4295	40x Water 2.78Hz	1116	[24.5000000000000,480.500000000000,22.5000000000000,31,27,8]	1116x3 double	1116x1 uint16	[42.5872619419294,498.129253824540,26.0224789260069]	7347.38	30720	318x2 double	318	1x60 double	1x60 double	4743	4357	[90.4910488868487,972,22.5374110626578]	[4127;3935;4743;4623]	322	1.01439	6.09582	4.7234	1x60 double	60	TRUE	TRUE	[]	5095.85	1x60 double	0.413902	26	1.33714	5.94439	7.28153	9.18
090620_S015	4295	40x Water 2.78Hz	22998	[233.500000000000,6.50000000000000,264.500000000000,67,81,26]	22998x3 double	22998x1 uint16	[267.094540612517,51.3529368249741,279.568223849682]	6018.97	40960	2832x2 double	2832	1x60 double	1x60 double	4677	2854.06	[283.432075214607,883.251902750472,256.754073151266]	18x1 uint16	325	1.03893	6.96499	3.61933	1x60 double	60	TRUE	TRUE	[]	3978.31	1x60 double	0.509884	285	3.75171	5.54205	9.29377	102.42
090620_S015	4295	40x Water 2.78Hz	1682	[45.5000000000000,461.500000000000,20.5000000000000,41,28,9]	1682x3 double	1682x1 uint16	[64.5013020833333,471.953125000000,24.9299479166667]	5844.47	28160	389x2 double	389	1x60 double	1x60 double	4533	3789.68	[51.8346758513416,390.127159602244,21.6245069718349]	19x1 uint16	331	1.04575	4.51198	3.2625	1x60 double	60	TRUE	TRUE	[]	4159.18	1x60 double	0.436709	23	0.72	4.60052	5.32052	8.1
090620_S015	4295	40x Water 2.78Hz	25414	[120.500000000000,85.5000000000000,41.5000000000000,79,145,11]	25414x3 double	25414x1 uint16	[158.510810557844,158.230016847623,47.2155715711968]	6457.32	51200	4261x2 double	4261	1x60 double	1x60 double	3925	2287.91	[279.710613104462,333.815889855764,40.6403822465928]	22x1 uint16	372	1.01064	1.00859	5.574	1x60 double	60	TRUE	TRUE	[]	4270.47	1x60 double	0.537563	47	1.09758	1.981	3.07858	16.74
090620_S015	4295	40x Water 2.78Hz	776	[276.500000000000,158.500000000000,194.500000000000,23,16,6]	776x3 double	776x1 uint16	[289.013833992095,168.293972332016,197.389822134387]	6677.11	23040	229x2 double	229	1x60 double	1x60 double	3680	2386.81	[112.327958312603,102.314938856739,190.667569195318]	80x1 uint16	381	1.24561	2.0804	3.38873	1x60 double	60	TRUE	TRUE	[]	5075.28	1x60 double	0.418502	196	0.396	1.072	1.468	70.38
090620_S015	4295	40x Water 2.78Hz	3230	[28.5000000000000,365.500000000000,231.500000000000,43,27,9]	3230x3 double	3230x1 uint16	[44.9354873922061,379.404540988975,236.227922715861]	7260.73	43520	656x2 double	656	1x42 double	1x42 double	3118	1851.22	[14.8923233899526,975.247824260249,221.315047116019]	[1645;1686;2538;3118;2425;1185;1389;1218;1457]	408	1.05615	7.46614	2.94317	1x42 double	42	TRUE	TRUE	[]	5479.02	1x42 double	0.354701	236	0.601967	0.825882	1.42785	84.78
090620_S015	4295	40x Water 2.78Hz	983	[257.500000000000,695.500000000000,253.500000000000,16,15,9]	983x3 double	983x1 uint16	[265.425758382118,703.649281532730,257.401277275146]	4893.43	20480	179x2 double	179	1x60 double	1x60 double	2436	1582.39	[137.996125841462,372.225498007968,242.630855886798]	23x1 uint16	448	1.01117	2.31991	4.65746	1x60 double	60	TRUE	TRUE	[]	3132.07	1x60 double	0.598174	257	0.871875	1.89643	2.7683	92.34
090620_S015	4295	40x Water 2.78Hz	957	[59.5000000000000,720.500000000000,195.500000000000,20,15,7]	957x3 double	957x1 uint16	[68.5533929510784,728.999473961073,198.850604944766]	5085.22	25600	204x2 double	204	1x60 double	1x60 double	2196	1918.67	[122.670952050035,337.822793606671,190.152536483669]	[1854;1934;1979;2196;1793;1756]	466	1.45614	4.96854	3.98795	1x60 double	60	TRUE	TRUE	[]	3312.94	1x60 double	0.537879	199	1.06875	2.8	3.86875	71.46
090620_S015	4295	40x Water 2.78Hz	9209	[221.500000000000,961.500000000000,263.500000000000,57,63,13]	9209x3 double	9209x1 uint16	[256.063701034143,999.773260264833,270.031530414922]	5764.43	28160	1414x2 double	1414	1x60 double	1x60 double	1419	1147.86	[115.031238332296,872.196577473553,255.211138767890]	14x1 uint16	502	1.07951	2.75931	5.87915	1x60 double	60	TRUE	TRUE	[]	4058.08	1x60 double	0.424684	271	1.67325	2.4095	4.08275	97.38
090620_S007	4295	40x Water 2.78Hz	14229	[84.5000000000000,300.500000000000,169.500000000000,71,68,14]	14229x3 double	14229x1 uint16	[118.410538797002,329.937438453345,176.545509355092]	8952.35	48640	2064x2 double	2064	1x75 double	1x75 double	3613	1207.66	[296.166579149332,950.609080260128,159.228278870622]	41x1 uint16	5	1.03551	1.55364	6.11044	1x75 double	75	TRUE	TRUE	[]	5178.29	1x100 double	0.617246	177	1.6388	4.75312	6.39193	63.54
090620_S007	4295	40x Water 2.78Hz	3581	[154.500000000000,295.500000000000,171.500000000000,55,50,13]	3581x3 double	3581x1 uint16	[180.809005795809,315.578600089166,177.406598305840]	8017.43	38400	835x2 double	835	1x75 double	1x75 double	2760	927.09	[294.942710234139,15.8352838130459,161.565387703462]	133x1 uint16	8	1.01212	2.26154	4.9501	1x75 double	75	TRUE	FALSE	[]	5049.49	1x100 double	0.52034	177	1.31268	8.88136	10.194	63.54
090620_S007	4295	40x Water 2.78Hz	1743	[76.5000000000000,490.500000000000,43.5000000000000,37,17,15]	1743x3 double	1743x1 uint16	[93.9644268774704,501.754940711462,51.4496047430830]	5945.43	25600	306x2 double	306	1x75 double	1x75 double	2240	822.936	[41.6937916305255,837.831215324943,50.2668813315222]	297x1 uint16	12	1.14013	9.71407	4.42458	1x75 double	75	TRUE	TRUE	[]	3672.68	1x100 double	0.758542	66	6.35029	1.29273	7.64302	23.58
090620_S007	4295	40x Water 2.78Hz	71	[225.500000000000,828.500000000000,234.500000000000,9,4,5]	71x3 double	71x1 uint16	[229.540880503145,830.398322851153,237.259958071279]	17198.9	33280	26x2 double	26	1x75 double	1x75 double	1361	672.179	[227.083915061352,693.812823447136,217.037713777100]	234x1 uint16	36	1.11321	2.67147	4.59322	1x75 double	75	TRUE	TRUE	[]	9649.23	1x100 double	0.785714	237	0.993333	2.22	3.21333	85.14
090620_S007	4295	40x Water 2.78Hz	400	[262.500000000000,789.500000000000,235.500000000000,10,23,9]	400x3 double	400x1 uint16	[268.032674772037,801.720364741641,238.694528875380]	8422.4	30720	108x2 double	108	1x75 double	1x75 double	1016	589.6	[275.127424375449,777.219311198021,218.280988107590]	85x1 uint16	49	1.21905	1.78913	4.88281	1x75 double	75	TRUE	TRUE	[]	6447.41	1x100 double	0.386029	238	0.663429	0.315	0.978429	85.5
090620_S007	4295	40x Water 2.78Hz	4211	[0.500000000000000,416.500000000000,67.5000000000000,52,24,12]	4211x3 double	4211x1 uint16	[23.3285540704739,429.834264884569,72.9311057108141]	5003.28	28160	779x2 double	779	1x75 double	1x75 double	991	469.103	[49.5728462216995,235.877830049985,65.0371949426639]	29x1 uint16	52	1	0.764953	3.93162	1x75 double	75	TRUE	TRUE	[]	3207.39	1x100 double	0.571721	71	0.456545	3.80769	4.62424	25.38
090620_S007	4295	40x Water 2.78Hz	149	[128.500000000000,279.500000000000,173.500000000000,6,7,6]	149x3 double	149x1 uint16	[131.463215258856,283.038147138965,176.801089918256]	6305.5	20480	34x2 double	34	1x75 double	1x75 double	771	381.714	[52.0327470059880,1006.63884730539,163.011321107784]	28x1 uint16	74	1.16	3.53448	4.06897	1x75 double	75	TRUE	TRUE	[]	4216.47	1x100 double	0.571429	176	0.425455	1.71692	2.14238	63.18
090620_S007	4295	40x Water 2.78Hz	125	[28.5000000000000,510.500000000000,61.5000000000000,5,9,6]	125x3 double	125x1 uint16	[30.7868525896414,515.559760956175,64.6892430278885]	10281	33280	40x2 double	40	1x75 double	1x75 double	737	389.896	[37.8452967823596,530.647575111585,61.8147025514623]	154x1 uint16	76	1.68571	3.54223	4.05085	1x75 double	75	TRUE	TRUE	[]	6336	1x100 double	0.727273	65	1.164	1.45714	2.62114	23.22
090620_S007	4295	40x Water 2.78Hz	262	[115.500000000000,281.500000000000,170.500000000000,11,9,10]	262x3 double	262x1 uint16	[119.350467289720,286.054205607477,176.677570093458]	10455	28160	64x2 double	64	1x75 double	1x75 double	640	396.4	[88.6844096871847,838.775731584258,158.828960645812]	[500;445;267;229;611;382;640;278;345;267]	89	1.14035	8.40476	5.23077	1x75 double	75	TRUE	TRUE	[]	7040	1x100 double	0.465909	182	3.32182	1.20293	4.52475	65.34
090620_S007	4295	40x Water 2.78Hz	3284	[1.50000000000000,500.500000000000,47.5000000000000,23,48,26]	3284x3 double	3284x1 uint16	[12.9680924456709,513.599517074854,62.7640565712315]	4519.76	35840	581x2 double	581	1x75 double	1x75 double	579	412.667	[81.7550484652666,741.584208400646,46.5632067851373]	12x1 uint16	96	1.1985	1.34952	4.60625	1x75 double	75	TRUE	TRUE	[]	3551.39	1x100 double	0.559553	65	1.84542	3.915	5.76042	23.22
090620_S007	4295	40x Water 2.78Hz	79	[225.500000000000,804.500000000000,234.500000000000,7,6,4]	79x3 double	79x1 uint16	[229.455801104972,807.718232044199,236.762430939227]	11730.6	48640	29x2 double	29	1x75 double	1x75 double	511	402.385	[78.8952399158861,427.906901166125,215.274134964634]	13x1 uint16	113	1.34091	1.6072	3.81356	1x75 double	75	TRUE	TRUE	[]	8209.66	1x100 double	0.526882	236	0.275625	0.964286	1.23991	84.78
090620_S007	4295	40x Water 2.78Hz	569	[53.5000000000000,317.500000000000,171.500000000000,25,10,8]	569x3 double	569x1 uint16	[66.7741312741313,324.039253539254,175.694337194337]	6991.63	25600	130x2 double	130	1x75 double	1x75 double	500	306.5	[168.817563893420,436.987765089723,159.458401305057]	12x1 uint16	115	1.19811	1.86152	4.40157	1x75 double	75	TRUE	TRUE	[]	5060.92	1x100 double	0.474708	175	0.405	1.54588	1.95088	62.82
090620_S007	4295	40x Water 2.78Hz	228849	[137.500000000000,706.500000000000,73.5000000000000,161,316,188]	228849x3 double	228849x1 uint16	[257.843087015238,848.189306395736,204.455984534378]	6232.69	65535	15369x2 double	15369	1x100 double	1x100 double	433	255.167	[26.7220770738080,251.945133899412,69.3465055519268]	12x1 uint16	126	1.02829	3.07383	6.26403	1x100 double	100	TRUE	TRUE	[]	4075.78	1x100 double	0.865626	238	4.11967	9.35136	13.471	85.5
090620_S007	4295	40x Water 2.78Hz	8043	[193.500000000000,715.500000000000,147.500000000000,78,35,15]	8043x3 double	8043x1 uint16	[233.460883295852,734.779558830566,154.428824345662]	6651.93	30720	1579x2 double	1579	1x75 double	1x75 double	412	219.444	[45.4151898734177,742.134683544304,137.915949367089]	[310;124;135;412;159;325;242;139;129]	136	1.10463	1.59019	5.68495	1x75 double	75	TRUE	TRUE	[]	4351.51	1x75 double	0.502608	154	1.19148	7.61294	8.80442	55.26
090620_S007	4295	40x Water 2.78Hz	1248	[56.5000000000000,495.500000000000,46.5000000000000,19,14,16]	1248x3 double	1248x1 uint16	[67.5907913669065,503.372086330935,52.8440287769784]	7128.21	30720	187x2 double	187	1x75 double	1x75 double	305	247.333	[213.313342318059,725.714959568733,44.5343665768194]	[182;291;218;241;305;247]	165	1.00787	10.4741	5.36719	1x75 double	75	TRUE	FALSE	[]	4545.03	1x75 double	0.61747	66	5.96172	1.66985	7.63157	23.58
090620_S007	4295	40x Water 2.78Hz	9021	[84.5000000000000,455.500000000000,45.5000000000000,69,40,17]	9021x3 double	9021x1 uint16	[118.690508940853,472.032000970952,52.1651832672546]	7014.53	40960	1209x2 double	1209	1x75 double	1x75 double	287	219.8	[48,974.374886260237,45.2638762511374]	[162;287;198;238;214]	171	1.18228	8.3114	4.48715	1x75 double	75	TRUE	FALSE	[]	4332.31	1x75 double	0.77566	66	6.27733	1.54465	7.82198	23.58
090620_S007	4295	40x Water 2.78Hz	486	[100.500000000000,269.500000000000,172.500000000000,16,15,10]	486x3 double	486x1 uint16	[109.568093385214,275.659922178988,176.798443579767]	6768.72	25600	126x2 double	126	1x75 double	1x75 double	273	203.75	[40,319.220858895706,160.879754601227]	[230;273;180;132]	175	1.25882	2.5039	4.42991	1x75 double	75	TRUE	FALSE	[]	4408.89	1x75 double	0.677419	178	1.75154	3.1545	4.90604	63.9
090620_S007	4295	40x Water 2.78Hz	689	[1.50000000000000,479.500000000000,58.5000000000000,12,20,10]	689x3 double	689x1 uint16	[7.64601769911505,490.884218289086,64.6032448377581]	5038.26	25600	138x2 double	138	1x75 double	1x75 double	273	255	[247,435.708496732026,54.6431372549020]	[273;223;269]	176	1.24324	2.41024	4.52174	1x75 double	75	TRUE	FALSE	[]	3172.17	1x75 double	0.684211	65	0.966667	1.29484	2.26151	23.22
090620_S007	4295	40x Water 2.78Hz	201	[178.500000000000,718.500000000000,214.500000000000,8,7,8]	201x3 double	201x1 uint16	[182.770370370370,721.069629629630,218.776296296296]	8597.01	35840	41x2 double	41	1x75 double	1x75 double	233	210	[14.5547619047619,267.554761904762,199.554761904762]	[187;233]	185	1.36667	21.34	-1.92683	1x75 double	75	TRUE	FALSE	[]	6930.73	1x75 double	0.531532	242	0.920769	1.18125	2.10202	86.94
090620_S007	4295	40x Water 2.78Hz	1135	[228.500000000000,993.500000000000,282.500000000000,9,31,12]	1135x3 double	1135x1 uint16	[231.851359338290,1013.52052812374,287.966234084326]	7985.71	35840	181x2 double	181	1x61 double	1x61 double	189	156.571	[70,77.3220802919708,261.464416058394]	[84;173;189;141;140;185;184]	200	1.03622	6.38189	4.86616	1x61 double	61	TRUE	FALSE	[]	5212.57	1x61 double	0.490873	291	2.56434	3.48182	6.04616	104.58
090620_S015	4295	40x Water 2.78Hz	2013	[141.500000000000,129.500000000000,138.500000000000,32,34,13]	2013x3 double	2013x1 uint16	[160.618942731278,144.602122547056,145.445734881858]	6351.04	28160	418x2 double	418	1x100 double	1x100 double	9315	3121.08	[20.7703154801266,960.297265281166,142.404720053329]	360x1 uint16	18	1.00903	5.65659	5.65772	1x100 double	100	TRUE	TRUE	[]	4042.11	1x100 double	0.460606	149	2.70316	3.045	5.74816	53.46
090620_S015	4295	40x Water 2.78Hz	341	[25.5000000000000,401.500000000000,120.500000000000,17,12,6]	341x3 double	341x1 uint16	[33.9239130434783,407.044565217391,123.092391304348]	6906.74	23040	102x2 double	102	1x100 double	1x100 double	6476	2708.18	[8.60139700290566,831.381999850541,122.020269290113]	84x1 uint16	32	1.35	3.25636	4.46296	1x100 double	100	TRUE	TRUE	[]	4743.53	1x100 double	0.656085	124	1.28308	0.354286	1.63736	44.46
090620_S015	4295	40x Water 2.78Hz	641	[265.500000000000,860.500000000000,145.500000000000,20,18,6]	641x3 double	641x1 uint16	[276.322200392927,870.876227897839,148.332023575639]	6098.47	23040	177x2 double	177	1x100 double	1x100 double	5198	2263.91	[5.23051099864962,836.563953708495,145.623988793114]	35x1 uint16	46	1.36667	1.93592	4.70122	1x100 double	100	TRUE	TRUE	[]	4223.28	1x100 double	0.534247	148	0.936	1.04	1.976	53.1
090620_S015	4295	40x Water 2.78Hz	440	[72.5000000000000,425.500000000000,221.500000000000,8,14,10]	440x3 double	440x1 uint16	[77.1417597765363,431.936452513966,227.418994413408]	8331.64	25600	80x2 double	80	1x100 double	1x100 double	4050	1515.07	[7.15703133195790,807.122123824177,213.786533552471]	151x1 uint16	70	1.10323	3.52601	5.46784	1x100 double	100	TRUE	TRUE	[]	4192	1x100 double	1	230	3.2625	6.35268	9.61518	82.62
090620_S015	4295	40x Water 2.78Hz	553	[250.500000000000,440.500000000000,232.500000000000,15,13,9]	553x3 double	553x1 uint16	[256.668690958165,447.663967611336,237.629554655870]	6860.61	38400	111x2 double	111	1x100 double	1x100 double	3619	1771.43	[14.3772868959085,775.254414255209,228.888059298530]	115x1 uint16	77	1.08072	1.8488	4.9834	1x100 double	100	TRUE	TRUE	[]	4635.68	1x100 double	0.502488	238	0.812432	0.95434	1.76677	85.5
090620_S015	4295	40x Water 2.78Hz	249	[57.5000000000000,478.500000000000,227.500000000000,7,11,7]	249x3 double	249x1 uint16	[60.8886718750000,483.704101562500,231.450195312500]	10527.9	30720	57x2 double	57	1x100 double	1x100 double	2742	1805.58	[16.6448545393747,244.196998829627,218.221315415482]	53x1 uint16	112	1.10909	1.8194	4.61749	1x100 double	100	TRUE	TRUE	[]	6332.63	1x100 double	0.801418	232	0.955	1.57	2.525	83.34
090620_S015	4295	40x Water 2.78Hz	3917	[154.500000000000,91.5000000000000,136.500000000000,46,44,17]	3917x3 double	3917x1 uint16	[180.459198209198,112.463369963370,145.773402523403]	6423.2	30720	733x2 double	733	1x100 double	1x100 double	2450	1440.17	[135.772530011083,977.215799383087,134.258796351934]	52x1 uint16	128	1.06744	0.891641	3.79961	1x100 double	100	TRUE	TRUE	[]	4061.77	1x100 double	0.564918	143	0.50221	4.10211	4.60432	51.3
090620_S015	4295	40x Water 2.78Hz	1472	[65.5000000000000,719.500000000000,279.500000000000,43,14,10]	1472x3 double	1472x1 uint16	[85.2158781946710,727.526916802610,284.456226209897]	6396.52	25600	281x2 double	281	1x65 double	1x65 double	2089	1130.26	[129.510458257713,45.6531533575318,267.597254990926]	39x1 uint16	166	1.31667	1.31204	3.57384	1x65 double	65	TRUE	TRUE	[]	4190.75	1x65 double	0.569565	283	0.52875	1.96364	2.49239	101.7
090620_S015	4295	40x Water 2.78Hz	651	[1.50000000000000,495.500000000000,83.5000000000000,25,15,8]	651x3 double	651x1 uint16	[15.5556923076923,505.417230769231,87.5323076923077]	6390.17	23040	173x2 double	173	1x100 double	1x100 double	1472	700.72	[184.355063363398,661.724968603722,81.5963009475968]	25x1 uint16	247	1.27273	3.0254	4.52597	1x100 double	100	TRUE	TRUE	[]	3714.22	1x100 double	0.717131	88	1.23	0.61	1.84	31.5
090620_S015	4295	40x Water 2.78Hz	17013	[0.500000000000000,366.500000000000,217.500000000000,80,72,19]	17013x3 double	17013x1 uint16	[40.9608879875421,407.989443378119,227.876163401296]	8310.03	40960	2607x2 double	2607	1x100 double	1x100 double	1335	1107	[98,183,206.397018970190]	[1335;879]	278	1.03828	4.5871	6.27471	1x100 double	100	TRUE	TRUE	[]	5244.71	1x100 double	0.618236	233	3.08719	2.696	5.78319	83.7
090620_S015	4295	40x Water 2.78Hz	315	[185.500000000000,143.500000000000,141.500000000000,7,18,10]	315x3 double	315x1 uint16	[189.285524568393,150.268260292165,147.258964143426]	6119.62	25600	68x2 double	68	1x100 double	1x100 double	1126	1035	[249,360.637359098229,135.698550724638]	[936;1126;1043]	330	1.08475	4.22687	3.89062	1x100 double	100	TRUE	TRUE	[]	3350.59	1x100 double	1.06742	150	1.91455	0.328846	2.24339	53.82
090620_S015	4295	40x Water 2.78Hz	811	[51.5000000000000,390.500000000000,219.500000000000,10,17,13]	811x3 double	811x1 uint16	[56.9748700173310,400.105285961872,227.020363951473]	7285.43	38400	120x2 double	120	1x100 double	1x100 double	1095	839.333	[145.621525019857,152,207.186656076251]	[953;1095;470]	345	1.09442	3.72531	5.72941	1x100 double	100	TRUE	TRUE	[]	3712	1x100 double	0.931034	231	2.46	2.97	5.43	82.98
090620_S015	4295	40x Water 2.78Hz	1416	[106.500000000000,246.500000000000,204.500000000000,25,32,13]	1416x3 double	1416x1 uint16	[121.678687635575,266.139370932755,211.851952277657]	6667.57	38400	348x2 double	348	1x100 double	1x100 double	1078	793.111	[223.577752871953,879.565564583917,196.542729055758]	[861;796;615;992;910;809;715;1078;362]	352	1.24771	1.05198	4.5	1x100 double	100	TRUE	TRUE	[]	4465.29	1x100 double	0.53542	212	0.739756	1.6966	2.43635	76.14
090620_S015	4295	40x Water 2.78Hz	1090	[73.5000000000000,453.500000000000,219.500000000000,23,16,14]	1090x3 double	1090x1 uint16	[85.9447852760736,463.324130879346,226.551806407635]	6890.86	23040	187x2 double	187	1x100 double	1x100 double	994	642.364	[147.634305123125,422.373761675630,208.536371355788]	11x1 uint16	373	1.02156	4.49738	6.21372	1x100 double	100	TRUE	TRUE	[]	4148.02	1x100 double	0.712871	231	2.11765	2.71233	4.82998	82.98
090620_S015	4295	40x Water 2.78Hz	688	[149.500000000000,115.500000000000,139.500000000000,16,13,8]	688x3 double	688x1 uint16	[157.616796047989,122.775582215949,144.081157374735]	5272.56	28160	147x2 double	147	1x100 double	1x100 double	963	827.333	[166.304593070105,571.307413376310,134]	[963;763;756]	388	1.01081	1.95972	5.40642	1x100 double	100	TRUE	TRUE	[]	3639.73	1x100 double	0.497608	144	0.977143	1.32632	2.30346	51.66
090620_S015	4295	40x Water 2.78Hz	251	[155.500000000000,214.500000000000,23.5000000000000,9,9,7]	251x3 double	251x1 uint16	[161.124410377359,218.530660377359,26.3054245283019]	17297.8	53760	61x2 double	61	1x100 double	1x100 double	902	696.5	[126.533141899976,518,24.9932998324958]	[533;712;815;902;603;614]	406	1	7.74019	5.89299	1x100 double	100	TRUE	TRUE	[]	11750.8	1x100 double	0.492857	35	4.32766	2.2275	6.55516	12.42
090620_S015	4295	40x Water 2.78Hz	1058	[220.500000000000,425.500000000000,234.500000000000,17,27,6]	1058x3 double	1058x1 uint16	[228.488904299584,439.081830790569,237.316574202497]	6978.3	30720	300x2 double	300	1x100 double	1x100 double	837	837	[20,1017,225]	837	426	1.05376	2.06081	5.06803	1x100 double	100	TRUE	TRUE	[]	4940.8	1x100 double	0.421416	238	0.9	0.871429	1.77143	85.5
090620_S015	4295	40x Water 2.78Hz	603	[227.500000000000,207.500000000000,19.5000000000000,22,24,9]	603x3 double	603x1 uint16	[236.797257006559,217.024448419797,23.1449016100179]	7119.6	25600	169x2 double	169	1x100 double	1x100 double	804	683.556	[221.461313394018,108.330949284785,20.6436931079324]	[705;644;655;758;583;799;804;634;570]	437	1.10135	4.67646	5.40491	1x100 double	100	TRUE	TRUE	[]	4423.2	1x100 double	0.69863	28	1.8	4.98098	6.78098	9.9
090620_S015	4295	40x Water 2.78Hz	366	[150.500000000000,234.500000000000,22.5000000000000,15,21,9]	366x3 double	366x1 uint16	[159.933040078201,245.665200391007,26.9828934506354]	14310.8	51200	104x2 double	104	1x100 double	1x100 double	729	642.833	[102.939849624060,218.182525278714,23.6883588281047]	[556;646;698;704;729;524]	464	1.01015	6.65002	5.88442	1x100 double	100	TRUE	TRUE	[]	10043.1	1x100 double	0.590686	34	4.1625	6.31929	10.4818	12.06
090620_S015	4295	40x Water 2.78Hz	955	[74.5000000000000,406.500000000000,119.500000000000,28,12,8]	955x3 double	955x1 uint16	[88.7063848920863,412.226618705036,122.869604316547]	5961.72	23040	200x2 double	200	1x100 double	1x100 double	697	664.5	[198,413,116.475545522950]	[697;632]	475	1.3045	2.2945	4.64987	1x100 double	100	TRUE	TRUE	[]	3520	1x100 double	0.8	123	1.11808	1.31	2.42808	44.1
090620_S015	4295	40x Water 2.78Hz	10768	[83.5000000000000,956.500000000000,271.500000000000,80,63,13]	10768x3 double	10768x1 uint16	[129.883700537104,991.751068727392,277.671818480763]	6506.75	35840	1662x2 double	1662	1x71 double	1x71 double	665	665	[35,232,258]	665	488	1.05382	7.21026	5.38221	1x71 double	71	TRUE	TRUE	[]	3980.17	1x71 double	0.517802	280	2.55653	11.0563	13.6129	100.62
090620_S015	4295	40x Water 2.78Hz	770	[45.5000000000000,455.500000000000,222.500000000000,23,27,11]	770x3 double	770x1 uint16	[61.2300347222222,468.940538194444,228.819444444444]	7660.05	30720	195x2 double	195	1x100 double	1x100 double	328	328	[112,939,209]	328	597	1.05143	2.36293	6.00543	1x100 double	100	TRUE	TRUE	[]	4765.54	1x100 double	0.595041	230	1.40063	2.88973	4.29035	82.62
090620_S015	4295	40x Water 2.78Hz	461	[49.5000000000000,437.500000000000,223.500000000000,9,24,10]	461x3 double	461x1 uint16	[53.7516891891892,449.311655405405,227.981418918919]	6574.92	25600	130x2 double	130	1x100 double	1x100 double	326	263.8	[33.4207733131160,910.174374526156,210.435936315390]	[285;230;229;249;326]	598	1.10526	3.21796	4.74026	1x100 double	100	TRUE	TRUE	[]	4647.38	1x100 double	0.508475	230	0.576	2.4	2.976	82.62
090620_S015	4295	40x Water 2.78Hz	1689	[230.500000000000,362.500000000000,66.5000000000000,32,10,14]	1689x3 double	1689x1 uint16	[246.496233938857,368.023039432876,74.5350022153301]	6841.82	30720	228x2 double	228	1x100 double	1x100 double	326	211.5	[11,975.229314420804,65]	[326;97]	599	1.11261	1.14176	5.1417	1x100 double	100	TRUE	TRUE	[]	4221.75	1x100 double	0.768617	75	1.0125	2.06571	3.07821	26.82
091320_S005	4344	40x Water 2.78Hz	2283	[128.500000000000,924.500000000000,142.500000000000,23,36,12]	2283x3 double	2283x1 uint16	[136.568765281174,944.193765281174,149.813569682152]	11007	48640	450x2 double	450	1x55 double	1x55 double	9369	3983.15	[294.091366199199,489.995617050331,130.674054486540]	107x1 uint16	12	1.01404	14.0382	1.29363	1x55 double	55	TRUE	TRUE	[]	5353.24	1x55 double	0.926674	160	5.27707	6.87097	12.148	57.42
091320_S005	4344	40x Water 2.78Hz	649	[111.500000000000,160.500000000000,117.500000000000,15,26,11]	649x3 double	649x1 uint16	[116.551571164510,173.008133086876,121.435859519409]	10670	40960	186x2 double	186	1x55 double	1x55 double	7367	2634.39	[293.812476896938,727.135404251792,114.333232771124]	229x1 uint16	25	1.04662	20.2685	-2.58352	1x55 double	55	TRUE	TRUE	[]	8271.83	1x55 double	1.21298	148	3.69	2.82984	6.51984	53.1
091320_S005	4344	40x Water 2.78Hz	16198	[138.500000000000,50.5000000000000,268.500000000000,84,121,10]	16198x3 double	16198x1 uint16	[189.291621997673,116.501151889784,273.661184735750]	6928.82	51200	4035x2 double	4035	1x55 double	1x55 double	4523	3816.18	[70.0813653712791,384.931794961382,238.970815400660]	99x1 uint16	52	1.0736	0.619146	4.93277	1x55 double	55	TRUE	TRUE	[]	4830.06	1x55 double	0.36858	273	0.852316	2.84761	3.69993	98.1
091320_S005	4344	40x Water 2.78Hz	581	[150.500000000000,132.500000000000,125.500000000000,19,15,12]	581x3 double	581x1 uint16	[160.407885304660,140.007885304660,131.432974910394]	6146.64	20480	142x2 double	142	1x55 double	1x55 double	4450	2216.08	[291.092136971026,117.904352284110,118.071155190988]	191x1 uint16	56	1.01481	10.7664	-0.445255	1x55 double	55	TRUE	TRUE	[]	4236.62	1x55 double	0.914894	147	3.38677	2.04429	5.43105	52.74
091320_S005	4344	40x Water 2.78Hz	222	[2.50000000000000,854.500000000000,146.500000000000,10,9,6]	222x3 double	222x1 uint16	[7.06961325966851,858.623204419890,149.886187845304]	10436	30720	64x2 double	64	1x55 double	1x55 double	4357	2700.12	[294.727004540027,1010.91463983091,131.014833308856]	58x1 uint16	58	1.23636	12.5627	1.35294	1x55 double	55	TRUE	TRUE	[]	6240	1x55 double	0.801282	161	2.421	1.7475	4.1685	57.78
091320_S005	4344	40x Water 2.78Hz	604	[118.500000000000,205.500000000000,125.500000000000,20,14,8]	604x3 double	604x1 uint16	[128.327160493827,214.591906721536,128.995198902606]	6179.6	33280	149x2 double	149	1x55 double	1x55 double	4163	2210.02	[283.169234916387,621.241651664083,118.738502565682]	235x1 uint16	59	1.24818	9.59756	0.0233918	1x55 double	55	TRUE	TRUE	[]	4656.11	1x55 double	0.937269	145	3.264	2.3693	5.6333	52.02
091320_S005	4344	40x Water 2.78Hz	107	[141.500000000000,207.500000000000,136.500000000000,7,10,4]	107x3 double	107x1 uint16	[144.422343324251,213.340599455041,138.525885558583]	8780.56	23040	47x2 double	47	1x55 double	1x55 double	4152	2298.4	[265.316059340073,883.277236129890,127.674827252270]	186x1 uint16	60	1.18182	5.54931	1.64103	1x55 double	55	TRUE	TRUE	[]	5991.49	1x55 double	0.845455	148	2.0113	1.11857	3.12988	53.1
091320_S005	4344	40x Water 2.78Hz	1436	[125.500000000000,165.500000000000,120.500000000000,36,22,14]	1436x3 double	1436x1 uint16	[140.171341294085,180.710913635101,128.585948347681]	6419.61	28160	342x2 double	342	1x55 double	1x55 double	3545	1711.47	[294.034050269481,619.113302775399,112.804311690928]	58x1 uint16	75	1.0029	13.5595	-0.945087	1x55 double	55	TRUE	TRUE	[]	4416.37	1x55 double	0.944068	148	4.33775	1.90385	6.24159	53.1
091320_S005	4344	40x Water 2.78Hz	370	[87.5000000000000,825.500000000000,144.500000000000,10,9,7]	370x3 double	370x1 uint16	[92.3792557403009,829.771971496437,148.022961203484]	8738.59	23040	72x2 double	72	1x55 double	1x55 double	3260	2303.66	[290.379240221192,836.509080741164,130.600908856265]	111x1 uint16	87	1.40909	15.936	1.09677	1x55 double	55	TRUE	TRUE	[]	4942.22	1x55 double	0.992806	163	6.975	1.39592	8.37092	58.5
091320_S005	4344	40x Water 2.78Hz	12844	[107.500000000000,862.500000000000,141.500000000000,71,61,13]	12844x3 double	12844x1 uint16	[143.611883840045,892.103331610357,148.161599548893]	8483.24	56320	2090x2 double	2090	1x55 double	1x55 double	2403	1849.03	[263.448939121983,767.918390381164,128.413981486562]	69x1 uint16	120	1.10263	16.5768	0.747475	1x55 double	55	TRUE	TRUE	[]	4459.79	1x55 double	0.88245	159	5.4493	5.99464	11.4439	57.06
091320_S005	4344	40x Water 2.78Hz	145	[128.500000000000,833.500000000000,148.500000000000,8,10,4]	145x3 double	145x1 uint16	[133.531543624161,839.253691275168,150.671140939597]	13153.1	46080	52x2 double	52	1x55 double	1x55 double	2314	1970.68	[282.946532062068,75.2606361669738,132.727158614427]	19x1 uint16	123	1.15789	11.3153	1.30303	1x55 double	55	TRUE	TRUE	[]	7926.15	1x55 double	0.863354	155	2.412	5.2344	7.6464	55.62
091320_S005	4344	40x Water 2.78Hz	169	[113.500000000000,821.500000000000,148.500000000000,9,12,5]	169x3 double	169x1 uint16	[118.633540372671,827.913043478261,151.103519668737]	7316.45	23040	66x2 double	66	1x55 double	1x55 double	2299	2008.11	[274.767609140707,884.773308249876,132.442040613069]	[1863;2032;2134;2299;1756;2061;1889;2250;1789]	125	1.08163	6.74054	2.75472	1x55 double	55	TRUE	TRUE	[]	5197.58	1x55 double	0.597015	152	0.925714	3.79343	4.71915	54.54
091320_S005	4344	40x Water 2.78Hz	473	[128.500000000000,971.500000000000,146.500000000000,11,34,8]	473x3 double	473x1 uint16	[135.338728323699,985.734104046243,151.217341040462]	9363.21	30720	164x2 double	164	1x55 double	1x55 double	2068	1879.12	[190.909266280849,158.573854187454,131.373611388279]	32x1 uint16	143	1.2	13.5866	0.730159	1x55 double	55	TRUE	TRUE	[]	6103.41	1x55 double	0.754476	157	3.15614	7.8357	10.9918	56.34
091320_S005	4344	40x Water 2.78Hz	192	[70.5000000000000,812.500000000000,143.500000000000,8,8,7]	192x3 double	192x1 uint16	[74.8094534711965,816.672082717873,146.490398818316]	9026.67	25600	49x2 double	49	1x55 double	1x55 double	1889	1713.26	[125.840931432784,190.200694273777,129.247388793315]	19x1 uint16	152	1.31915	11.7025	-0.322581	1x55 double	55	TRUE	TRUE	[]	5067.76	1x55 double	1.15464	162	5.265	1.032	6.297	58.14
091320_S005	4344	40x Water 2.78Hz	1110	[29.5000000000000,881.500000000000,141.500000000000,19,18,12]	1110x3 double	1110x1 uint16	[41.9825422804146,890.315875613748,148.048008728860]	4227.46	28160	211x2 double	211	1x55 double	1x55 double	1877	1603.85	[257.776546762590,907.069112709832,127.801151079137]	13x1 uint16	154	1.05882	9.18619	0.935185	1x55 double	55	TRUE	TRUE	[]	2293.08	1x55 double	1.01058	161	5.64857	1.675	7.32357	57.78
091320_S005	4344	40x Water 2.78Hz	131	[128.500000000000,850.500000000000,146.500000000000,7,8,6]	131x3 double	131x1 uint16	[133.342237061770,853.771285475793,149.545909849750]	11705.6	48640	40x2 double	40	1x55 double	1x55 double	1824	1773.17	[168.495911269856,134.668013911082,130.837766707397]	[1726;1791;1824;1748;1763;1787]	158	1.18868	9.94387	0.428571	1x55 double	55	TRUE	TRUE	[]	6656	1x55 double	1.25962	159	4.356	3.948	8.304	57.06
091320_S005	4344	40x Water 2.78Hz	633	[151.500000000000,942.500000000000,143.500000000000,18,15,11]	633x3 double	633x1 uint16	[159.893796004206,948.823343848580,148.701892744480]	7692.13	33280	152x2 double	152	1x55 double	1x55 double	1641	1597.5	[266,69,128.513615023474]	[1554;1641]	168	1.0119	17.6429	0.470588	1x55 double	55	TRUE	TRUE	[]	4513.68	1x55 double	0.80597	153	2.76545	5.74036	8.50582	54.9
091320_S005	4344	40x Water 2.78Hz	625	[68.5000000000000,843.500000000000,143.500000000000,15,10,9]	625x3 double	625x1 uint16	[76.1251588310038,847.907242693774,148.344980940280]	6447.1	20480	103x2 double	103	1x55 double	1x55 double	1563	1466.2	[171.807393261492,128.417337334606,128]	[1420;1439;1423;1465;1507;1424;1471;1563;1492;1458]	175	1.01786	16.2291	1.47368	1x55 double	55	TRUE	TRUE	[]	3827.57	1x55 double	0.753247	155	3.99	4.725	8.715	55.62
091320_S005	4344	40x Water 2.78Hz	5716	[14.5000000000000,837.500000000000,139.500000000000,45,37,15]	5716x3 double	5716x1 uint16	[37.7013042095218,857.908705333475,147.835436327007]	4223.82	38400	873x2 double	873	1x55 double	1x55 double	1451	1385	[6,962.476173285199,127.523826714801]	[1319;1451]	188	1.0092	12.6226	1.92705	1x55 double	55	TRUE	TRUE	[]	2366.46	1x55 double	0.846344	160	5.69011	3.57158	9.26169	57.42
091320_S005	4344	40x Water 2.78Hz	373	[141.500000000000,122.500000000000,86.5000000000000,8,8,10]	373x3 double	373x1 uint16	[145.590485074627,125.761194029851,91.5895522388060]	7357.43	38400	50x2 double	50	1x55 double	1x55 double	1060	1003	[109.403589232303,33.1742771684945,79]	[998;939;1059;1036;958;1045;1060;1033;957;945]	224	1.04444	3.62977	3.91489	1x55 double	55	TRUE	TRUE	[]	5017.6	1x55 double	0.479592	100	0.3384	0.14339	0.48179	35.82
091320_S005	4344	40x Water 2.78Hz	17012	[86.5000000000000,28.5000000000000,75.5000000000000,87,127,9]	17012x3 double	17012x1 uint16	[129.321394783079,87.9362886876605,79.7249628328153]	5567.08	46080	4249x2 double	4249	1x55 double	1x55 double	916	673.8	[260.830513505491,874.146779459780,69.1555357672900]	[674;774;716;781;916;807;549;473;600;448]	241	1.06392	1.96589	3.25337	1x55 double	55	TRUE	TRUE	[]	3966.83	1x55 double	0.409933	80	0.918053	1.25135	2.1694	28.62
091320_S005	4344	40x Water 2.78Hz	4998	[171.500000000000,817.500000000000,67.5000000000000,30,31,12]	4998x3 double	4998x1 uint16	[185.688921343626,830.435322345087,73.1861047360735]	4910	33280	644x2 double	644	1x55 double	1x55 double	769	624.333	[261.861719167112,197.778964228510,62.3211425520555]	[518;752;769;504;580;623]	253	1.02575	7.47546	2.51883	1x55 double	55	TRUE	TRUE	[]	3052.92	1x55 double	0.625	71	0.571658	6.62333	7.19499	25.38
091320_S005	4344	40x Water 2.78Hz	732	[103.500000000000,187.500000000000,116.500000000000,16,13,9]	732x3 double	732x1 uint16	[113.246341463415,193.757317073171,120.455487804878]	5735.52	30720	160x2 double	160	1x55 double	1x55 double	679	619.333	[288.671959095802,626.178148546825,107.670882669537]	[565;658;591;628;679;595]	267	1.0449	18.787	-1.94141	1x55 double	55	TRUE	TRUE	[]	4672	1x55 double	1.36301	147	3.15	2.76	5.91	52.74
091320_S005	4344	40x Water 2.78Hz	221	[182.500000000000,136.500000000000,120.500000000000,11,12,7]	221x3 double	221x1 uint16	[188.476997578693,142.213075060533,124.239709443099]	4784.07	20480	86x2 double	86	1x55 double	1x55 double	647	634	[294,710.489747634069,110]	[647;621]	271	1.05882	19.1359	-1.81481	1x55 double	55	TRUE	TRUE	[]	3750.7	1x55 double	0.753968	147	4.5975	2.44452	7.04202	52.74
091320_S005	4344	40x Water 2.78Hz	55952	[75.5000000000000,259.500000000000,228.500000000000,130,133,17]	55952x3 double	55952x1 uint16	[139.254957284438,321.974433537414,237.488788638525]	5821.54	43520	8239x2 double	8239	1x55 double	1x55 double	222	222	[36,640,209]	222	311	1.03213	642.501	-26.1233	1x55 double	55	TRUE	TRUE	[]	3774.28	1x55 double	0.642628	247	4.35098	[]	[]	88.74
091320_S009	4344	40x Water 2.78Hz	21512	[55.5000000000000,357.500000000000,19.5000000000000,99,141,8]	21512x3 double	21512x1 uint16	[103.684995280218,436.825866772582,21.9067162301943]	7660.15	65535	5656x2 double	5656	1x55 double	1x55 double	14627	6543.21	[103.590010142476,434.302884549498,21.7735143401871]	21512x1 uint16	19	1.01886	4.00063	4.93565	1x55 double	55	TRUE	TRUE	[]	4833.04	1x55 double	0.515733	26	3.39258	4.13132	7.5239	9.18
091320_S009	4344	40x Water 2.78Hz	705	[17.5000000000000,483.500000000000,19.5000000000000,13,20,7]	705x3 double	705x1 uint16	[23.1219358893778,493.449402891263,21.8365807668133]	5777.25	25600	186x2 double	186	1x55 double	1x55 double	9148	5858.5	[22.5928486981752,492.614958303886,21.9146270157117]	705x1 uint16	35	1.10112	6.70152	2.69388	1x55 double	55	TRUE	TRUE	[]	3674.84	1x55 double	0.790262	30	4.554	4.428	8.982	10.62
091320_S009	4344	40x Water 2.78Hz	2718	[92.5000000000000,307.500000000000,19.5000000000000,34,49,9]	2718x3 double	2718x1 uint16	[108.257388809182,331.283931133429,22.4667144906743]	6564.83	33280	688x2 double	688	1x55 double	1x55 double	8903	5716.36	[109.215796553531,330.042972222544,22.4908538681063]	2718x1 uint16	37	1.06806	3.72475	3.29657	1x55 double	55	TRUE	TRUE	[]	4599.07	1x55 double	0.46521	25	2.36423	4.2375	6.60173	8.82
091320_S009	4344	40x Water 2.78Hz	547	[25.5000000000000,394.500000000000,19.5000000000000,21,14,6]	547x3 double	547x1 uint16	[33.2168888888889,401.737777777778,21.9448888888889]	5265.08	28160	145x2 double	145	1x55 double	1x55 double	7734	5734.15	[33.4560969412236,400.961926696617,21.9382219046790]	547x1 uint16	44	1.04348	6.31088	2.36111	1x55 double	55	TRUE	TRUE	[]	3283.86	1x55 double	0.693548	32	5.05	1.24435	6.29435	11.34
091320_S009	4344	40x Water 2.78Hz	752	[96.5000000000000,501.500000000000,19.5000000000000,27,25,6]	752x3 double	752x1 uint16	[109.676190476190,509.843537414966,21.6455782312925]	10008.5	46080	234x2 double	234	1x55 double	1x55 double	6530	5261.14	[109.309230076679,510.321908835373,21.7362127156106]	752x1 uint16	59	1.1122	3.12934	3.56579	1x55 double	55	TRUE	TRUE	[]	6947.01	1x55 double	0.483465	25	2.32676	3.73982	6.06659	8.82
091320_S009	4344	40x Water 2.78Hz	11265	[20.5000000000000,490.500000000000,259.500000000000,80,82,9]	11265x3 double	11265x1 uint16	[66.8399172495321,532.028404426493,264.128788625094]	6920.52	40960	2975x2 double	2975	1x55 double	1x55 double	5185	2633.33	[285.289012574055,942.933237717275,239.048384441746]	233x1 uint16	88	1.0578	1.47439	3.65159	1x55 double	55	TRUE	TRUE	[]	5192.28	1x55 double	0.313059	264	0.983839	1.23964	2.22348	94.86
091320_S009	4344	40x Water 2.78Hz	389	[101.500000000000,993.500000000000,74.5000000000000,8,14,11]	389x3 double	389x1 uint16	[105.067507886435,1001.87318611987,80.1223974763407]	10430.8	33280	66x2 double	66	1x55 double	1x55 double	3617	1608.43	[249.336164019124,585.114334322949,71.1791380706354]	129x1 uint16	114	1.16129	7.33801	1.55556	1x55 double	55	TRUE	TRUE	[]	6438.79	1x55 double	0.728916	87	3.16286	1.26	4.42286	31.14
091320_S009	4344	40x Water 2.78Hz	218	[19.5000000000000,799.500000000000,273.500000000000,12,14,4]	218x3 double	218x1 uint16	[26.5873417721519,804.470886075949,275.756962025316]	9277.06	23040	105x2 double	105	1x55 double	1x55 double	2138	1165.88	[244.095761856710,455.811486713757,251.705835856038]	51x1 uint16	175	1.17647	4.9673	2.5625	1x55 double	55	TRUE	TRUE	[]	7216.76	1x55 double	0.297297	277	0.8	1.19368	1.99368	99.54
091320_S009	4344	40x Water 2.78Hz	2450	[251.500000000000,487.500000000000,39.5000000000000,28,16,15]	2450x3 double	2450x1 uint16	[263.685464921115,495.858341725411,44.8425646189997]	3112.75	30720	336x2 double	336	1x55 double	1x55 double	1983	1454.11	[294,576.822801253152,37.7521204248491]	[872;1449;1676;1079;1892;1983;1432;1489;1215]	180	1.01429	7.87096	4.3662	1x55 double	55	TRUE	TRUE	[]	1904.76	1x55 double	0.48	44	1.32158	3.16	4.48158	15.66
091320_S009	4344	40x Water 2.78Hz	1535	[10.5000000000000,527.500000000000,261.500000000000,28,35,7]	1535x3 double	1535x1 uint16	[21.0161943319838,549.925775978408,264.492577597841]	3707.41	23040	401x2 double	401	1x55 double	1x55 double	1859	1859	[7,192,238]	1859	188	1.21528	3.46299	2.78857	1x55 double	55	TRUE	TRUE	[]	3172.87	1x55 double	0.344064	264	0.570968	0.679355	1.25032	94.86
091320_S009	4344	40x Water 2.78Hz	1233	[207.500000000000,951.500000000000,72.5000000000000,11,19,14]	1233x3 double	1233x1 uint16	[212.958369470945,961.236339982654,79.4843885516045]	9575.6	38400	160x2 double	160	1x55 double	1x55 double	1819	962.325	[245.606707713091,432.554672278077,68.2400176655496]	40x1 uint16	191	1.03774	4.33615	2.35758	1x55 double	55	TRUE	TRUE	[]	6384	1x55 double	0.611529	83	2.52878	2.96182	5.4906	29.7
091320_S009	4344	40x Water 2.78Hz	13691	[251.500000000000,27.5000000000000,37.5000000000000,49,73,12]	13691x3 double	13691x1 uint16	[274.946735666278,69.2867060048594,42.4433435360197]	5925.71	43520	1758x2 double	1758	1x55 double	1x55 double	1274	1145.6	[33.1546787709497,70.4017108938548,35.5825768156425]	[1267;1124;1274;1177;886]	246	1.04733	5.83351	4.33819	1x55 double	55	TRUE	TRUE	[]	4206.96	1x55 double	0.356179	42	1.50739	4.46651	5.9739	14.94
091320_S009	4344	40x Water 2.78Hz	302	[23.5000000000000,749.500000000000,273.500000000000,18,15,6]	302x3 double	302x1 uint16	[30.2262323943662,757.668133802817,276.612676056338]	9629.67	30720	134x2 double	134	1x55 double	1x55 double	1135	816.056	[248.644972428348,560.643951256042,250.070869358023]	18x1 uint16	259	1.22353	3.17344	4.5	1x55 double	55	TRUE	TRUE	[]	7622.69	1x55 double	0.258145	276	0.367826	1.665	2.03283	99.18
091320_S009	4344	40x Water 2.78Hz	11342	[116.500000000000,962.500000000000,71.5000000000000,25,57,20]	11342x3 double	11342x1 uint16	[131.199542315015,994.332238194136,82.7330106326832]	14422.7	65535	884x2 double	884	1x55 double	1x55 double	1046	844.4	[295,753.738512553292,66.6001894836570]	[864;824;864;1046;624]	268	1.00702	3.30239	3.30071	1x55 double	55	TRUE	TRUE	[]	6967.6	1x55 double	1.22261	85	2.19524	6.05949	8.25474	30.42
091320_S009	4344	40x Water 2.78Hz	408	[161.500000000000,945.500000000000,73.5000000000000,10,15,8]	408x3 double	408x1 uint16	[166.718574108818,954.313320825516,77.8536585365854]	6688.63	28160	113x2 double	113	1x55 double	1x55 double	939	617.393	[255.263087869497,527.804130271302,69.3126626945103]	28x1 uint16	282	1.22222	3.57146	2.63636	1x55 double	55	TRUE	TRUE	[]	4530.97	1x55 double	0.795	80	1.33364	2.78308	4.11671	28.62
091320_S009	4344	40x Water 2.78Hz	459	[0.500000000000000,711.500000000000,272.500000000000,18,12,7]	459x3 double	459x1 uint16	[7.96926579396699,716.992031872510,276.627774615822]	9799.39	48640	137x2 double	137	1x55 double	1x55 double	791	681.4	[230,198.176988552979,248.376284120928]	[681;791;653;651;631]	298	1.10078	4.00346	3.33099	1x55 double	55	TRUE	TRUE	[]	7100.73	1x55 double	0.515789	277	0.752727	1.20632	1.95904	99.54
091320_S009	4344	40x Water 2.78Hz	971	[2.50000000000000,751.500000000000,272.500000000000,27,29,7]	971x3 double	971x1 uint16	[14.3311444652908,766.009693558474,276.415259537211]	8431.39	30720	302x2 double	302	1x55 double	1x55 double	758	700.5	[252,416.541042112777,247]	[643;758]	304	1.20349	3.85303	2.29952	1x55 double	55	TRUE	TRUE	[]	6332.19	1x55 double	0.386881	279	1.9305	0.791471	2.72197	100.26
091320_S009	4344	40x Water 2.78Hz	6484	[159.500000000000,953.500000000000,72.5000000000000,44,71,13]	6484x3 double	6484x1 uint16	[179.065015454610,986.255855963648,78.4394264655513]	9373.48	46080	1160x2 double	1160	1x55 double	1x55 double	754	662.667	[59.9434104627767,59.4944668008048,67]	[663;684;753;754;594;528]	305	1.0077	3.16729	2.91986	1x55 double	55	TRUE	TRUE	[]	6468.81	1x55 double	0.430946	84	3.13334	1.75451	4.88786	30.06
091320_S009	4344	40x Water 2.78Hz	945	[148.500000000000,963.500000000000,73.5000000000000,12,28,8]	945x3 double	945x1 uint16	[154.191674733785,977.820587286221,76.9173927073250]	8395.17	38400	227x2 double	227	1x55 double	1x55 double	651	565.25	[247.499336576736,998.435647943388,68]	[651;481;625;504]	315	1.31795	1.84438	3.13619	1x55 double	55	TRUE	TRUE	[]	6157.53	1x55 double	0.520147	78	1.07163	2.93091	4.00254	27.9
091320_S023	4344	40x Water 2.78Hz	631	[210.500000000000,749.500000000000,194.500000000000,36,14,5]	631x3 double	631x1 uint16	[233.545023696682,755.286729857820,197.342022116904]	5136.23	23040	216x2 double	216	1x100 double	1x100 double	5802	2421.76	[293.710406016247,952.367175937937,183.854625647247]	113x1 uint16	26	1.03322	3.20645	5.07717	1x100 double	100	TRUE	FALSE	[]	3093.33	1x100 double	0.62069	198	1.16609	0.99	2.15609	71.1
091320_S023	4344	40x Water 2.78Hz	1578	[41.5000000000000,134.500000000000,271.500000000000,15,15,17]	1578x3 double	1578x1 uint16	[47.6712032168265,142.338385400557,280.499536034643]	5244.92	28160	153x2 double	153	1x69 double	1x69 double	4808	2321.84	[198.981657241718,153.471711771777,252.643530730036]	708x1 uint16	41	1.29333	2.10696	4.07216	1x69 double	69	TRUE	TRUE	[]	2610.2	1x69 double	1.07692	283	1.47	6.27158	7.74158	101.7
091320_S023	4344	40x Water 2.78Hz	1695	[250.500000000000,825.500000000000,121.500000000000,20,30,9]	1695x3 double	1695x1 uint16	[260.070061517430,835.106288448394,125.865686944634]	4419.21	28160	325x2 double	325	1x100 double	1x100 double	3302	2929.38	[298.246340943034,404.515767015148,111.443609985065]	[2275;3068;2689;2732;3302;3258;3070;3041]	75	1.07487	2.22511	5.43781	1x100 double	100	TRUE	TRUE	[]	2922.34	1x100 double	0.544474	126	1.15087	1.41333	2.5642	45.18
091320_S023	4344	40x Water 2.78Hz	903	[257.500000000000,342.500000000000,217.500000000000,40,14,8]	903x3 double	903x1 uint16	[279.960863697706,350.655195681512,220.891363022942]	4201.46	23040	272x2 double	272	1x100 double	1x100 double	2177	1179.76	[71.6671053512079,706.384577636011,204.176908835404]	38x1 uint16	134	1.21705	2.81402	4.73248	1x100 double	100	TRUE	FALSE	[]	3021.18	1x100 double	0.464174	222	1.2482	0.339494	1.58769	79.74
091320_S023	4344	40x Water 2.78Hz	7924	[158.500000000000,570.500000000000,184.500000000000,71,28,11]	7924x3 double	7924x1 uint16	[195.106435809677,582.075162740756,190.440171800550]	4814.05	38400	1164x2 double	1164	1x100 double	1x100 double	2095	1508.23	[244.239110572064,804.850099049929,174.652848190823]	82x1 uint16	143	1.01543	2.75358	5.71409	1x100 double	100	TRUE	FALSE	[]	3030.65	1x100 double	0.57402	192	1.7425	2.4792	4.2217	68.94
091320_S023	4344	40x Water 2.78Hz	13599	[153.500000000000,309.500000000000,215.500000000000,101,50,12]	13599x3 double	13599x1 uint16	[198.285972921914,336.522355163728,221.101897040302]	4783.03	30720	2373x2 double	2373	1x100 double	1x100 double	1981	1104.39	[45.3041827316275,41.5381761888071,202.842738637691]	31x1 uint16	153	1.0408	0.296487	4.95572	1x100 double	100	TRUE	FALSE	[]	3182.47	1x100 double	0.490847	220	0.758769	3.22054	3.97931	79.02
091320_S023	4344	40x Water 2.78Hz	578	[260.500000000000,1003.50000000000,274.500000000000,19,21,5]	578x3 double	578x1 uint16	[269.286626215833,1015.27963744367,276.727793057477]	5416.75	23040	215x2 double	215	1x72 double	1x72 double	1974	1561.62	[63.1423997438566,777.342111582486,254.234531337549]	[1524;1349;1974;1612;1580;1593;1313;1548]	154	1.8208	3.77187	2.29129	1x72 double	72	TRUE	FALSE	[]	3827.54	1x72 double	0.610013	276	0.383936	0.567666	0.951603	99.18
091320_S023	4344	40x Water 2.78Hz	986	[83.5000000000000,185.500000000000,205.500000000000,14,18,14]	986x3 double	986x1 uint16	[89.6841828691540,194.806621124540,215.299001576458]	4940.85	20480	175x2 double	175	1x100 double	1x100 double	1751	1264	[51.3673928919182,749.321141674781,193.739836903603]	13x1 uint16	177	1.20392	1.97825	4.26384	1x100 double	100	TRUE	FALSE	[]	3364.57	1x100 double	0.665217	216	0.252661	1.20194	1.4546	77.58
091320_S023	4344	40x Water 2.78Hz	332	[181.500000000000,372.500000000000,217.500000000000,10,11,6]	332x3 double	332x1 uint16	[187.290824261275,378.287713841369,220.716951788491]	4958.07	20480	86x2 double	86	1x100 double	1x100 double	1734	991.643	[15.1121155369877,133.658323129007,204.234351364979]	28x1 uint16	179	1.76596	2.99127	2.51807	1x100 double	100	TRUE	TRUE	[]	3601.86	1x100 double	0.669421	220	0.208286	0.475714	0.684	79.02
091320_S023	4344	40x Water 2.78Hz	1643	[98.5000000000000,299.500000000000,108.500000000000,44,12,9]	1643x3 double	1643x1 uint16	[117.514448514449,303.533170533171,112.454619454619]	3828.31	20480	312x2 double	312	1x100 double	1x100 double	1415	658.273	[59.5674630575887,989.698752474336,102.006398747871]	33x1 uint16	215	1.0738	1.31826	4.90378	1x100 double	100	TRUE	FALSE	[]	2215.38	1x100 double	0.751852	112	1.03171	3.11667	4.14837	40.14
091320_S023	4344	40x Water 2.78Hz	5133	[250.500000000000,931.500000000000,170.500000000000,33,92,10]	5133x3 double	5133x1 uint16	[267.088017057569,980.082643923241,174.495948827292]	5847.65	33280	1301x2 double	1301	1x100 double	1x100 double	1211	637.105	[97.6805452292441,779.839570425444,162.923998347790]	19x1 uint16	244	1.35301	2.39219	2.56456	1x100 double	100	TRUE	FALSE	[]	3998.4	1x100 double	0.594488	173	0.193624	0.855	1.04862	62.1
091320_S023	4344	40x Water 2.78Hz	887	[284.500000000000,355.500000000000,108.500000000000,15,26,8]	887x3 double	887x1 uint16	[292.738364779874,369.843396226415,112.068553459120]	4588.95	23040	202x2 double	202	1x100 double	1x100 double	1161	511	[263.635327150515,332.578830936782,102.286735301625]	23x1 uint16	255	1.19811	0.632954	4.27559	1x100 double	100	TRUE	FALSE	[]	3155.64	1x100 double	0.590361	111	0.774286	3.455	4.22929	39.78
091320_S023	4344	40x Water 2.78Hz	1679	[126.500000000000,357.500000000000,108.500000000000,36,17,9]	1679x3 double	1679x1 uint16	[143.822474377745,364.355783308931,112.018667642753]	4165.53	30720	359x2 double	359	1x100 double	1x100 double	1038	578.727	[79.8865849827207,697.579013509268,102.261859880616]	11x1 uint16	266	1.30287	0.796112	4.18637	1x100 double	100	TRUE	FALSE	[]	2923.68	1x100 double	0.541463	111	0.495319	1.50286	1.99818	39.78
091320_S023	4344	40x Water 2.78Hz	2477	[178.500000000000,256.500000000000,116.500000000000,46,35,9]	2477x3 double	2477x1 uint16	[201.206702544031,274.872798434442,120.499021526419]	4224.98	20480	551x2 double	551	1x100 double	1x100 double	979	662.75	[63.1850245190494,758.151075066013,105]	[462;439;659;979;881;495;752;635]	276	1.17544	1.47581	3.14179	1x100 double	100	TRUE	FALSE	[]	3001.38	1x100 double	0.459752	118	0.220909	3.6825	3.90341	42.3
091320_S023	4344	40x Water 2.78Hz	1393	[220.500000000000,99.5000000000000,249.500000000000,23,27,7]	1393x3 double	1393x1 uint16	[230.149399399399,111.558183183183,253.061186186186]	4895.79	20480	349x2 double	349	1x96 double	1x96 double	975	699.556	[9.52334815756036,626.412166454892,233.437102922490]	[631;627;710;975;601;744;856;760;392]	277	1.01379	1.5524	3.81633	1x96 double	96	TRUE	TRUE	[]	3315.53	1x96 double	0.438053	251	0.375429	3.22875	3.60418	90.18
091320_S023	4344	40x Water 2.78Hz	24872	[156.500000000000,351.500000000000,105.500000000000,123,69,13]	24872x3 double	24872x1 uint16	[217.550819402463,378.913042584254,111.910986367281]	5005.65	46080	3704x2 double	3704	1x100 double	1x100 double	974	459.333	[148.120222544751,83.9361393323657,100.724479922593]	[206;602;446;566;333;974;275;617;115]	278	1.00718	0.932751	5.75243	1x100 double	100	TRUE	FALSE	[]	2866.18	1x100 double	0.770436	112	1.12947	2.25692	3.38639	40.14
091320_S023	4344	40x Water 2.78Hz	11865	[184.500000000000,127.500000000000,246.500000000000,101,96,10]	11865x3 double	11865x1 uint16	[234.439449908763,178.308513952557,252.245404779919]	4847.93	33280	2921x2 double	2921	1x97 double	1x97 double	943	826.5	[62.4957652752571,88.4337568058076,230]	[929;738;943;696]	280	1.1394	0.698225	3.76106	1x97 double	97	TRUE	FALSE	[]	3425.02	1x97 double	0.443449	251	0.424272	1.63842	2.06269	90.18
091320_S023	4344	40x Water 2.78Hz	1597	[285.500000000000,320.500000000000,108.500000000000,15,25,9]	1597x3 double	1597x1 uint16	[294.278468256634,332.932146456164,112.888478333893]	4772.15	25600	292x2 double	292	1x100 double	1x100 double	877	455.118	[285.197621817242,899.001550988755,101.646503812847]	17x1 uint16	288	1.01418	2.34001	5.69231	1x100 double	100	TRUE	FALSE	[]	3059.73	1x100 double	0.590258	112	1.20667	5.67692	6.88359	40.14
091320_S023	4344	40x Water 2.78Hz	657	[190.500000000000,110.500000000000,250.500000000000,21,25,5]	657x3 double	657x1 uint16	[200.747306562194,120.482859941234,252.731635651322]	3978.33	20480	213x2 double	213	1x96 double	1x96 double	747	572.667	[6.78172293364377,467.346915017462,234]	[375;747;596]	311	1.20606	1.70119	4.19598	1x96 double	96	TRUE	FALSE	[]	2752.3	1x96 double	0.471616	252	0.636	1.65913	2.29513	90.54
091320_S023	4344	40x Water 2.78Hz	16723	[209.500000000000,230.500000000000,137.500000000000,89,115,10]	16723x3 double	16723x1 uint16	[247.031442827197,281.942162912226,142.010215228366]	5185.06	43520	3963x2 double	3963	1x100 double	1x100 double	746	586.6	[235,974.148312308217,128.367882713945]	[573;746;535;606;473]	312	1.38514	1.008	3.58039	1x100 double	100	TRUE	FALSE	[]	3552.22	1x100 double	0.514093	141	0.465159	0.949611	1.41477	50.58
091320_S023	4344	40x Water 2.78Hz	708	[187.500000000000,146.500000000000,249.500000000000,21,17,7]	708x3 double	708x1 uint16	[197.823582358236,152.831683168317,252.419441944194]	4017.18	17920	216x2 double	216	1x97 double	1x97 double	631	631	[294,1001,232]	631	328	1.08642	2.48872	3.86364	1x97 double	97	TRUE	FALSE	[]	2654.81	1x97 double	0.522321	251	0.588889	2.7	3.28889	90.18
091320_S023	4344	40x Water 2.78Hz	633	[146.500000000000,295.500000000000,108.500000000000,13,19,9]	633x3 double	633x1 uint16	[153.105263157895,304.339712918660,113.084210526316]	4226.22	17920	132x2 double	132	1x100 double	1x100 double	341	206.75	[145.756952841596,962.835550181379,101.819830713422]	[149;201;136;341]	378	1.10667	1.28718	4.96386	1x100 double	100	TRUE	FALSE	[]	2598.79	1x100 double	0.664179	113	0.855	1.785	2.64	40.5
091320_S023	4344	40x Water 2.78Hz	817	[179.500000000000,682.500000000000,259.500000000000,16,14,12]	817x3 double	817x1 uint16	[186.674883411059,688.948700866089,265.634910059960]	4703.26	17920	151x2 double	151	1x83 double	1x83 double	298	183	[70.6546448087432,414.598907103825,240.098360655738]	[156;160;211;298;90]	381	1.04615	4.7389	5.63235	1x83 double	83	TRUE	FALSE	[]	3221.19	1x83 double	0.447368	268	1.93765	2.604	4.54165	96.3
091320_S023	4344	40x Water 2.78Hz	3797	[88.5000000000000,319.500000000000,108.500000000000,74,27,10]	3797x3 double	3797x1 uint16	[132.134967372274,332.826515995544,113.168231736432]	4236.1	25600	688x2 double	688	1x100 double	1x100 double	271	271	[55,766,101]	271	386	1.10326	0.888426	5.17488	1x100 double	100	TRUE	FALSE	[]	2641.86	1x100 double	0.621127	113	1.00306	2.61346	3.61653	40.5
091320_S023	4344	40x Water 2.78Hz	17557	[171.500000000000,806.500000000000,105.500000000000,91,84,11]	17557x3 double	17557x1 uint16	[204.461079595298,846.963301947482,111.200157903971]	4986.44	28160	3352x2 double	3352	1x100 double	1x100 double	217	193.667	[176.309810671256,492,100.626506024096]	[217;184;180]	390	1.03383	1.22755	5.30429	1x100 double	100	TRUE	FALSE	[]	3429.12	1x100 double	0.519376	112	1.04211	1.70934	2.75145	40.14
091320_S023	4344	40x Water 2.78Hz	18277	[191.500000000000,619.500000000000,259.500000000000,75,101,11]	18277x3 double	18277x1 uint16	[228.174135642501,669.121420896277,264.867865495228]	4431.99	28160	3568x2 double	3568	1x84 double	1x84 double	194	124.25	[178,445.430583501006,240.344064386318]	[194;132;89;82]	391	1.02428	4.02855	6.33184	1x84 double	84	TRUE	FALSE	[]	3100.99	1x84 double	0.402129	268	2.56305	2.33302	4.89607	96.3
091320_S023	4344	40x Water 2.78Hz	406	[193.500000000000,717.500000000000,263.500000000000,13,18,6]	406x3 double	406x1 uint16	[201.056676272815,725.457252641691,266.630163304515]	6563.94	25600	115x2 double	115	1x82 double	1x82 double	180	173.5	[227.518731988473,898,244]	[167;180]	393	1.04082	1.88843	4.50327	1x82 double	82	TRUE	FALSE	[]	4585.74	1x82 double	0.398058	265	0.258947	2.664	2.92295	95.22
091320_S023	4344	40x Water 2.78Hz	2141	[203.500000000000,558.500000000000,259.500000000000,42,38,11]	2141x3 double	2141x1 uint16	[222.779775280899,573.362247191011,265.378202247191]	5320.88	28160	547x2 double	547	1x84 double	1x84 double	67	67	[217,96,240]	67	395	1.01325	2.2314	5.93791	1x84 double	84	TRUE	FALSE	[]	4057.62	1x84 double	0.366782	267	2.061	2.74255	4.80355	95.94
091320_S042	4344	40x Water 2.78Hz	39192	[238.500000000000,835.500000000000,78.5000000000000,59,188,36]	39192x3 double	39192x1 uint16	[273.667174522722,921.541952227736,101.593519005399]	7385.59	65535	6074x2 double	6074	1x55 double	1x55 double	39339	6437.08	[281.271788754465,938.356108829782,101.361268591293]	39192x1 uint16	4	1.08881	1.3132	5.25644	1x55 double	55	TRUE	TRUE	[]	5321.66	1x55 double	0.42934	101	1.04356	2.39532	3.43889	36.18
091320_S042	4344	40x Water 2.78Hz	49441	[238.500000000000,843.500000000000,19.5000000000000,59,181,17]	49441x3 double	49441x1 uint16	[272.458228481478,921.519047192385,24.3840676929534]	8537.72	65528	6786x2 double	6786	1x55 double	1x55 double	37693	8537.07	[278.975829685961,931.199203857049,24.0849212687695]	49441x1 uint16	5	1.01632	1.41891	4.27773	1x55 double	55	TRUE	TRUE	[]	5438.84	1x55 double	0.5576	24	1.43983	2.77129	4.21111	8.46
091320_S042	4344	40x Water 2.78Hz	1214	[111.500000000000,724.500000000000,87.5000000000000,19,27,8]	1214x3 double	1214x1 uint16	[122.568197653840,739.072534848935,90.8884131097868]	5694.68	23082	292x2 double	292	1x55 double	1x55 double	9859	3204.82	[123.189385161546,739.602762316200,90.9127649173094]	1214x1 uint16	20	1.20302	2.30401	3.05456	1x55 double	55	TRUE	TRUE	[]	3817	1x55 double	0.602032	90	0.523882	0.627948	1.15183	32.22
091320_S042	4344	40x Water 2.78Hz	1390	[205.500000000000,929.500000000000,19.5000000000000,28,17,8]	1390x3 double	1390x1 uint16	[218.783509687337,937.687091223851,23.8973708494731]	8029.21	30748	288x2 double	288	1x55 double	1x55 double	9325	4164.14	[217.241614689855,937.896852677484,23.7642324207459]	1390x1 uint16	25	1.09966	1.79672	4.3873	1x55 double	55	TRUE	TRUE	[]	5513.05	1x55 double	0.485261	24	1.53408	2.02613	3.56021	8.46
091320_S042	4344	40x Water 2.78Hz	13669	[28.5000000000000,670.500000000000,286.500000000000,54,98,10]	13669x3 double	13669x1 uint16	[58.5446184279287,726.135870594680,290.944404677725]	7507.35	40988	2740x2 double	2740	1x55 double	1x55 double	5675	2234.1	[30.3353550354480,742.088880183616,291.131853047203]	689x1 uint16	43	1.07191	3.67389	2.72123	1x55 double	55	TRUE	TRUE	[]	4922.07	1x55 double	0.520339	291	1.02905	5.90058	6.92963	104.58
091320_S042	4344	40x Water 2.78Hz	7429	[255.500000000000,850.500000000000,290.500000000000,42,101,12]	7429x3 double	7429x1 uint16	[273.687588140033,891.027382404971,295.662169624047]	11087.9	64008	1791x2 double	1791	1x53 double	1x53 double	5037	2423.06	[286.663436750708,286.886161447359,292.689742062050]	142x1 uint16	50	1.34627	1.31502	3.2249	1x53 double	53	TRUE	TRUE	[]	8387.61	1x53 double	0.441631	295	0.584555	1.40718	1.99173	106.02
091320_S042	4344	40x Water 2.78Hz	52635	[241.500000000000,837.500000000000,122.500000000000,56,182,39]	52635x3 double	52635x1 uint16	[274.054049618914,911.007809354893,150.958754292326]	8992.39	65535	5909x2 double	5909	1x55 double	1x55 double	4714	2002.57	[275.316281504031,38.9157475740276,127.559899071864]	208x1 uint16	55	1.03287	4.831	3.52796	1x55 double	55	TRUE	TRUE	[]	5457.07	1x55 double	0.613453	152	1.36637	4.29741	5.66378	54.54
091320_S042	4344	40x Water 2.78Hz	4043	[139.500000000000,652.500000000000,232.500000000000,36,61,8]	4043x3 double	4043x1 uint16	[158.729847107008,681.655143392249,236.525516397927]	4171.41	25651	1007x2 double	1007	1x55 double	1x55 double	2299	1357.95	[102.993338867541,212.656272175881,235.039866375674]	110x1 uint16	128	1.17525	3.07103	4.44441	1x55 double	55	TRUE	TRUE	[]	3387.95	1x55 double	0.335373	236	0.901203	1.87237	2.77357	84.78
091320_S042	4344	40x Water 2.78Hz	1819	[261.500000000000,885.500000000000,245.500000000000,26,46,6]	1819x3 double	1819x1 uint16	[275.191183469029,909.012329446849,248.494941598221]	16569	64006	581x2 double	581	1x55 double	1x55 double	2046	1178.27	[169.179146098554,191.267411448861,248.577119598164]	49x1 uint16	140	1.47549	1.37217	3.38981	1x55 double	55	TRUE	TRUE	[]	12179.2	1x55 double	0.329134	247	0.457494	1.42033	1.87782	88.74
091320_S042	4344	40x Water 2.78Hz	1334	[285.500000000000,205.500000000000,233.500000000000,15,19,10]	1334x3 double	1334x1 uint16	[293.809860518521,215.180091744911,238.294880314632]	3530.75	20499	222x2 double	222	1x55 double	1x55 double	1688	999.481	[283.960386867265,773.764729859927,235.781294004299]	27x1 uint16	163	1.61358	4.41709	1.92234	1x55 double	55	TRUE	TRUE	[]	2281	1x55 double	0.645707	236	0.232188	1.9965	2.22869	84.78
091320_S042	4344	40x Water 2.78Hz	16194	[86.5000000000000,718.500000000000,231.500000000000,86,66,10]	16194x3 double	16194x1 uint16	[125.293822047233,751.327830376772,236.410804933082]	5175.41	30709	3108x2 double	3108	1x55 double	1x55 double	1645	1086.38	[104.511364440983,198.473624584012,233.241662536288]	26x1 uint16	169	1.21124	1.65903	3.37651	1x55 double	55	TRUE	TRUE	[]	3831.09	1x55 double	0.439112	235	0.478591	1.32949	1.80808	84.42
091320_S042	4344	40x Water 2.78Hz	14715	[89.5000000000000,714.500000000000,182.500000000000,75,72,12]	14715x3 double	14715x1 uint16	[122.224334689179,750.735744089794,188.128755341062]	4716.74	28170	2624x2 double	2624	1x55 double	1x55 double	1607	1177.33	[13.8376745941865,921.677802944507,183.460739901850]	[1121;1480;1293;919;901;812;1607;1545;918]	175	1.10646	4.13082	4.29025	1x55 double	55	TRUE	TRUE	[]	3552.67	1x55 double	0.360469	187	0.892344	5.38979	6.28213	67.14
091320_S042	4344	40x Water 2.78Hz	5690	[170.500000000000,379.500000000000,109.500000000000,54,48,10]	5690x3 double	5690x1 uint16	[195.519914499466,401.884932028373,114.514830325933]	5281.01	25617	1093x2 double	1093	1x55 double	1x55 double	1523	948.911	[163.556879128324,409.228739720356,111.478443327876]	56x1 uint16	188	1.07146	2.04481	3.25918	1x55 double	55	TRUE	TRUE	[]	3710.64	1x55 double	0.433874	113	0.512241	4.02958	4.54182	40.5
091320_S042	4344	40x Water 2.78Hz	20061	[139.500000000000,275.500000000000,221.500000000000,74,79,12]	20061x3 double	20061x1 uint16	[187.449752774391,318.950308225192,227.109052065037]	5201.38	35809	2923x2 double	2923	1x55 double	1x55 double	1300	776.912	[167.241491576756,182.177285633163,222.664016657202]	34x1 uint16	231	1.26601	2.54827	3.46069	1x55 double	55	TRUE	TRUE	[]	3401.79	1x55 double	0.621235	226	0.669114	4.40456	5.07367	81.18
091320_S042	4344	40x Water 2.78Hz	2222	[135.500000000000,877.500000000000,307.500000000000,22,26,9]	2222x3 double	2222x1 uint16	[145.508843501448,893.399086962383,311.475524869104]	5805.29	25583	406x2 double	406	1x38 double	1x38 double	1044	680.7	[5.36829734097253,366.968121051858,308.673424416042]	[555;774;627;804;675;1044;715;688;388;537]	271	1.00092	5.05857	2.27846	1x38 double	38	TRUE	TRUE	[]	4026.63	1x38 double	0.464712	312	1.36205	2.66179	4.02384	112.14
091320_S042	4344	40x Water 2.78Hz	2387	[181.500000000000,389.500000000000,250.500000000000,32,38,7]	2387x3 double	2387x1 uint16	[197.638597242000,408.578972561506,253.407964070628]	5533.08	25598	664x2 double	664	1x55 double	1x55 double	812	801.5	[14,28.4934497816594,251]	[812;791]	312	1.55126	2.96569	1.90574	1x55 double	55	TRUE	TRUE	[]	4596.76	1x55 double	0.342367	251	0.150503	0.683084	0.833586	90.18
091320_S061	4344	40x Water 2.78Hz	31979	[161.500000000000,457.500000000000,190.500000000000,80,167,11]	31979x3 double	31979x1 uint16	[191.179155812439,516.573978345816,195.563303891241]	7866.92	46080	5491x2 double	5491	1x100 double	1x100 double	17556	4058.83	[292.958146555763,826.972033854194,177.784059796583]	355x1 uint16	2	1.12442	0.522884	4.11277	1x100 double	100	TRUE	TRUE	[]	5196.46	1x100 double	0.527185	194	0.520608	4.69782	5.21843	69.66
091320_S061	4344	40x Water 2.78Hz	1388	[228.500000000000,710.500000000000,190.500000000000,16,30,12]	1388x3 double	1388x1 uint16	[236.389874739040,721.945720250522,195.758350730689]	3533.83	15360	287x2 double	287	1x100 double	1x100 double	9361	2227.68	[9.32828013524797,915.732298719443,180.786761241041]	1086x1 uint16	5	1.01732	4.97076	4.54894	1x100 double	100	TRUE	TRUE	[]	2247.8	1x100 double	0.527778	200	0.337183	1.03696	1.37414	71.82
091320_S061	4344	40x Water 2.78Hz	6185	[3.50000000000000,319.500000000000,30.5000000000000,23,95,20]	6185x3 double	6185x1 uint16	[14.4754098360656,367.789927328038,45.5852628020957]	2449.07	23040	1172x2 double	1172	1x100 double	1x100 double	5292	1441.85	[14.3520078808364,714.100485023737,40.9307313667286]	2386x1 uint16	11	1.17857	1.17446	3.98232	1x100 double	100	TRUE	TRUE	[]	1850.1	1x100 double	0.510035	45	0.543529	1.52129	2.06482	16.02
091320_S061	4344	40x Water 2.78Hz	9522	[230.500000000000,531.500000000000,189.500000000000,44,111,10]	9522x3 double	9522x1 uint16	[247.602441314554,593.526697965571,194.645884194053]	4294.9	28160	1916x2 double	1916	1x100 double	1x100 double	1225	627.609	[289.790549456021,220.709637264421,174.074289839918]	64x1 uint16	81	1.25273	0.70576	4.27281	1x100 double	100	TRUE	TRUE	[]	2948.81	1x100 double	0.511554	194	0.721182	1.26205	1.98323	69.66
091320_S061	4344	40x Water 2.78Hz	8899	[74.5000000000000,330.500000000000,168.500000000000,29,72,16]	8899x3 double	8899x1 uint16	[87.6082370907703,368.897442015844,176.263386465591]	6027.9	33280	1061x2 double	1061	1x100 double	1x100 double	856	406.617	[50.3175048266985,982.722924519629,155.047922221201]	107x1 uint16	106	1.18421	8.37235	5.28395	1x100 double	100	TRUE	TRUE	[]	3964.26	1x100 double	0.533171	187	5.652	12.393	18.045	67.14
091320_S061	4344	40x Water 2.78Hz	2868	[142.500000000000,936.500000000000,52.5000000000000,43,59,7]	2868x3 double	2868x1 uint16	[169.184973166369,970.257841383423,55.4428145497913]	7484.52	33280	952x2 double	952	1x100 double	1x100 double	763	382.821	[295.412993971869,176.234695244474,49.6790354989953]	39x1 uint16	111	1.20322	2.841	2.4277	1x100 double	100	TRUE	TRUE	[]	5811.09	1x100 double	0.438223	54	0.254798	0.859626	1.11442	19.26
091320_S061	4344	40x Water 2.78Hz	4483	[141.500000000000,921.500000000000,95.5000000000000,50,102,8]	4483x3 double	4483x1 uint16	[169.953207876190,976.800915498075,98.4294121921093]	7859.31	38400	1594x2 double	1594	1x100 double	1x100 double	715	302.318	[6.73552849195610,778.107803337844,89.2620658547587]	22x1 uint16	117	1.3129	1.07554	3.24808	1x100 double	100	TRUE	TRUE	[]	5961.56	1x100 double	0.369612	96	0.193239	2.30571	2.49895	34.38
091320_S061	4344	40x Water 2.78Hz	11102	[3.50000000000000,537.500000000000,19.5000000000000,37,137,35]	11102x3 double	11102x1 uint16	[17.7940448696800,614.774744308809,29.2927251732102]	2795.66	40960	2108x2 double	2108	1x100 double	1x100 double	675	368.857	[7.20158791634392,577.078621223858,20.0336948102246]	14x1 uint16	122	1.24419	1.55599	3.01986	1x100 double	100	TRUE	TRUE	[]	2343.83	1x100 double	0.502073	27	0.206904	3.6774	3.8843	9.54
091320_S061	4344	40x Water 2.78Hz	3632	[254.500000000000,477.500000000000,189.500000000000,41,42,12]	3632x3 double	3632x1 uint16	[270.721694036301,497.668107173725,194.543647363872]	2446.52	17920	752x2 double	752	1x100 double	1x100 double	576	429.5	[294.378812572759,306.981373690338,173.979511059371]	[419;334;458;576;550;371;483;439;328;337]	134	1.59701	1.94449	3.00748	1x100 double	100	TRUE	TRUE	[]	1668.09	1x100 double	0.65102	194	0.612	0.559687	1.17169	69.66
091320_S061	4344	40x Water 2.78Hz	1364	[77.5000000000000,454.500000000000,171.500000000000,21,20,13]	1364x3 double	1364x1 uint16	[87.7163271511098,464.322894496808,178.192763757981]	6172.9	25600	289x2 double	289	1x100 double	1x100 double	517	316.765	[243.594800371402,923.926462395543,156.667038068709]	17x1 uint16	141	1.05907	14.0923	4.56972	1x100 double	100	TRUE	TRUE	[]	4375.92	1x100 double	0.526316	206	10.2462	5.778	16.0242	73.98
091320_S061	4344	40x Water 2.78Hz	3160	[231.500000000000,650.500000000000,191.500000000000,21,58,9]	3160x3 double	3160x1 uint16	[239.798397863818,680.468434102613,195.408163265306]	4247.49	35840	631x2 double	631	1x100 double	1x100 double	420	312	[116.084706959707,341.920558608059,176.475732600733]	14x1 uint16	153	1.32031	0.629579	3.94675	1x100 double	100	TRUE	TRUE	[]	2742.57	1x100 double	0.596154	194	0.5751	3.40269	3.97779	69.66
091320_S061	4344	40x Water 2.78Hz	20740	[1.50000000000000,289.500000000000,139.500000000000,28,146,19]	20740x3 double	20740x1 uint16	[15.7861387991951,372.059057513220,149.700453928588]	2637.64	38400	2472x2 double	2472	1x100 double	1x100 double	410	291	[47.2920962199313,15.5704467353952,126.703321878580]	[300;218;224;302;410;292]	154	1.28298	0.545406	4.12189	1x100 double	100	TRUE	TRUE	[]	1650.74	1x100 double	0.827478	148	0.615682	3.89893	4.51461	53.1
091320_S061	4344	40x Water 2.78Hz	719	[144.500000000000,600.500000000000,25.5000000000000,13,24,7]	719x3 double	719x1 uint16	[150.446293494705,615.021180030257,29.3086232980333]	4706.98	23040	180x2 double	180	1x100 double	1x100 double	383	283	[204,434.114840989399,24.6236749116608]	[193;233;383;323]	162	1.34568	2.20913	3.72477	1x100 double	100	TRUE	TRUE	[]	3242.67	1x100 double	0.526316	29	0.474146	0.663158	1.1373	10.26
091320_S061	4344	40x Water 2.78Hz	2346	[97.5000000000000,20.5000000000000,121.500000000000,19,19,16]	2346x3 double	2346x1 uint16	[106.439299340964,29.8609087755810,131.342872008325]	6291.97	30720	269x2 double	269	1x100 double	1x100 double	337	200.19	[24.9752616555661,398.640342530923,110.721693625119]	21x1 uint16	172	1.02521	1.47799	5.60246	1x100 double	100	TRUE	TRUE	[]	4396.73	1x100 double	0.582251	132	1.33784	1.972	3.30984	47.34
091320_S061	4344	40x Water 2.78Hz	25858	[189.500000000000,98.5000000000000,112.500000000000,73,73,25]	25858x3 double	25858x1 uint16	[237.070729760084,134.181513105371,128.507692724050]	7316.36	48640	2295x2 double	2295	1x100 double	1x100 double	327	258.4	[37.2902476780186,139.601393188855,103]	[182;226;327;289;268]	176	1.02288	3.77776	6.38785	1x100 double	100	TRUE	TRUE	[]	4313.52	1x100 double	0.761314	132	2.37782	6.63184	9.00966	47.34
091320_S061	4344	40x Water 2.78Hz	331	[210.500000000000,513.500000000000,25.5000000000000,11,20,8]	331x3 double	331x1 uint16	[216.296900489396,522.840130505710,29.6476345840131]	4741.03	17920	123x2 double	123	1x100 double	1x100 double	307	254.667	[273.598167539267,204.739528795812,24]	[307;199;258]	179	1.09091	2.08215	4.23611	1x100 double	100	TRUE	TRUE	[]	3996.1	1x100 double	0.265625	29	0.286875	0.98	1.26687	10.26
091320_S061	4344	40x Water 2.78Hz	4734	[216.500000000000,42.5000000000000,307.500000000000,44,35,9]	4734x3 double	4734x1 uint16	[244.981255093725,58.2544417277914,312.109535452323]	6635.23	35840	781x2 double	781	1x37 double	1x37 double	239	236.5	[40.4947145877378,95,282]	[239;234]	196	1.0651	3.81131	2.41087	1x37 double	37	TRUE	TRUE	[]	4588.99	1x37 double	0.57	311	0.398041	1.3905	1.78854	111.78
091320_S061	4344	40x Water 2.78Hz	19021	[140.500000000000,450.500000000000,24.5000000000000,68,211,10]	19021x3 double	19021x1 uint16	[181.842474629327,559.690284252512,29.5448593884111]	7997.09	46080	4477x2 double	4477	1x100 double	1x100 double	209	205	[292,717.490243902439,23]	[209;201]	204	1.11174	0.555271	5.02203	1x100 double	100	TRUE	TRUE	[]	5647.78	1x100 double	0.436772	29	0.819044	3.79019	4.60923	10.26
091320_S061	4344	40x Water 2.78Hz	14288	[26.5000000000000,741.500000000000,200.500000000000,73,71,9]	14288x3 double	14288x1 uint16	[56.5259887005650,772.102071563089,204.366424535916]	6659.8	33280	2877x2 double	2877	1x100 double	1x100 double	177	168.5	[228.474777448071,671,183]	[177;160]	211	1.06463	0.636443	3.72112	1x100 double	100	TRUE	TRUE	[]	4704.46	1x100 double	0.483072	203	0.509095	1.32375	1.83284	72.9
011121_S009	4419	40x Water 2.78Hz	3904	[61.5000000000000,389.500000000000,125.500000000000,42,19,13]	3904x3 double	3904x1 uint16	[83.1850606636457,397.921502704283,131.929250109633]	4485.9	25600	548x2 double	548	1x75 double	1x75 double	11653	4009.63	[6.36592246532254,175.086558039255,120.513715618961]	183x1 uint16	17	1.08108	18.7692	0.69375	1x75 double	75	TRUE	TRUE	[]	2905.69	1x75 double	0.586817	130	0.528882	11.892	12.4209	46.62
011121_S009	4419	40x Water 2.78Hz	1261	[55.5000000000000,169.500000000000,145.500000000000,33,13,10]	1261x3 double	1261x1 uint16	[69.9175141242938,175.563276836158,150.637288135593]	3593.34	20480	242x2 double	242	1x75 double	1x75 double	8113	2557.89	[7.92038602015788,538.557182716922,140.346352409413]	146x1 uint16	28	1.19231	2.17785	4.31183	1x75 double	75	TRUE	TRUE	[]	2538.84	1x75 double	0.483333	149	0.524571	2.77714	3.30171	53.46
011121_S009	4419	40x Water 2.78Hz	321	[180.500000000000,20.5000000000000,287.500000000000,18,10,6]	321x3 double	321x1 uint16	[189.958152958153,25.7243867243867,290.591630591631]	5526.73	23040	105x2 double	105	1x58 double	1x58 double	6821	2336.78	[274.227096469931,992.200666800580,271.287261357880]	196x1 uint16	41	1.07692	4.07724	5.27143	1x58 double	58	TRUE	TRUE	[]	3852.19	1x58 double	0.455696	291	0.962609	0.678857	1.64147	104.58
011121_S009	4419	40x Water 2.78Hz	12273	[134.500000000000,30.5000000000000,265.500000000000,60,32,15]	12273x3 double	12273x1 uint16	[168.285045153071,44.9596058005771,273.282534567392]	5566.59	35840	1177x2 double	1177	1x75 double	1x75 double	5440	2202.58	[32.8490440259651,581.779199121208,250.523995136525]	205x1 uint16	58	1.15857	9.79643	5.05298	1x75 double	75	TRUE	TRUE	[]	3186.41	1x75 double	0.79727	274	2.08421	15.8688	17.953	98.46
011121_S009	4419	40x Water 2.78Hz	1064	[78.5000000000000,84.5000000000000,204.500000000000,21,16,12]	1064x3 double	1064x1 uint16	[89.7208099956915,91.4928909952607,211.948298147350]	5584.36	23040	205x2 double	205	1x75 double	1x75 double	4544	2017.91	[26.1084350783297,969.869066423841,192.027751451066]	80x1 uint16	72	1.34343	2.34146	4.86466	1x75 double	75	TRUE	TRUE	[]	3708.88	1x75 double	0.606061	214	1.8	2.64316	4.44316	76.86
011121_S009	4419	40x Water 2.78Hz	5692	[146.500000000000,31.5000000000000,181.500000000000,44,29,14]	5692x3 double	5692x1 uint16	[168.863206751055,44.9376371308017,188.845569620253]	5329.59	33280	824x2 double	824	1x75 double	1x75 double	4035	1944.61	[6.62767741358494,336.268110271431,168.332357018289]	46x1 uint16	87	1.13534	2.29948	5.53201	1x75 double	75	TRUE	TRUE	[]	3672.23	1x75 double	0.427242	190	1.96297	4.62706	6.59003	68.22
011121_S009	4419	40x Water 2.78Hz	2590	[228.500000000000,844.500000000000,172.500000000000,25,16,12]	2590x3 double	2590x1 uint16	[241.129481231548,852.334668916069,178.110080134964]	4687.07	28160	337x2 double	337	1x75 double	1x75 double	2972	1327.39	[272.343446622721,973.837633764233,158.717781011900]	44x1 uint16	134	1.12821	5.15171	4.18182	1x75 double	75	TRUE	TRUE	[]	2742.31	1x75 double	0.770083	178	1.28571	3.58169	4.86741	63.9
011121_S009	4419	40x Water 2.78Hz	13262	[111.500000000000,592.500000000000,256.500000000000,96,43,12]	13262x3 double	13262x1 uint16	[163.397966147966,616.632336882337,261.936527436527]	5656.63	38400	1903x2 double	1903	1x75 double	1x75 double	2511	1473.06	[294.730572637968,491.779011261081,238.961025477198]	34x1 uint16	166	1.01584	1.83892	3.67154	1x75 double	75	TRUE	TRUE	[]	3509.74	1x75 double	0.581066	260	0.624214	6.75692	7.38114	93.42
011121_S009	4419	40x Water 2.78Hz	13974	[37.5000000000000,436.500000000000,231.500000000000,102,33,11]	13974x3 double	13974x1 uint16	[85.6014129784689,451.034389952153,236.786109449761]	4900.9	30720	2040x2 double	2040	1x75 double	1x75 double	2024	1311.31	[254.841618607311,979.773461703446,215.864973070874]	16x1 uint16	210	1.02255	0.912535	4.04123	1x75 double	75	TRUE	FALSE	[]	3289.1	1x75 double	0.498283	235	0.550408	3.06783	3.61823	84.42
011121_S009	4419	40x Water 2.78Hz	3177	[253.500000000000,330.500000000000,223.500000000000,46,29,11]	3177x3 double	3177x1 uint16	[274.136130328052,342.892211559920,229.086810979692]	3610.75	25600	544x2 double	544	1x75 double	1x75 double	1739	1146.36	[120.718645189430,76.9509392531095,209.103957045526]	58x1 uint16	237	1.04785	0.767185	3.84932	1x75 double	75	TRUE	TRUE	[]	2381.18	1x75 double	0.594862	227	0.483462	3.71829	4.20175	81.54
011121_S009	4419	40x Water 2.78Hz	17150	[20.5000000000000,97.5000000000000,197.500000000000,123,62,21]	17150x3 double	17150x1 uint16	[93.0529399760954,128.635775296621,209.331632801796]	5120.45	30720	2278x2 double	2278	1x75 double	1x75 double	1675	936.651	[68.3106316416725,63.8985003476016,183.804921044791]	43x1 uint16	243	1.00083	4.0674	5.56017	1x75 double	75	TRUE	TRUE	[]	3454.54	1x75 double	0.556929	215	2.75241	3.44636	6.19876	77.22
011121_S009	4419	40x Water 2.78Hz	1290	[55.5000000000000,865.500000000000,255.500000000000,29,10,9]	1290x3 double	1290x1 uint16	[69.9527476373819,869.911095554778,259.228911445572]	5669.71	25600	235x2 double	235	1x75 double	1x75 double	1633	906.857	[39.9702268431002,588.713610586011,237.307130854862]	21x1 uint16	246	1.01923	5.52064	3.5	1x75 double	75	TRUE	TRUE	[]	3747.4	1x75 double	0.502907	258	0.641667	4.33385	4.97551	92.7
011121_S009	4419	40x Water 2.78Hz	2199	[166.500000000000,845.500000000000,187.500000000000,51,21,9]	2199x3 double	2199x1 uint16	[186.529682365827,854.954435925520,192.501204819277]	5314.42	30720	521x2 double	521	1x75 double	1x75 double	1280	972.426	[85.8050498862244,268.779909854717,170.617910904954]	47x1 uint16	296	1.0991	2.73207	4.20902	1x75 double	75	TRUE	TRUE	[]	3857.2	1x75 double	0.420382	192	0.328177	3.13116	3.45934	68.94
011121_S009	4419	40x Water 2.78Hz	85055	[203.500000000000,519.500000000000,173.500000000000,97,91,42]	85055x3 double	85055x1 uint16	[267.000713662293,560.725191796741,194.465712866656]	6241.79	46080	5150x2 double	5150	1x75 double	1x75 double	1171	662.429	[66.2324060096327,47.1965351160952,158.853784774639]	21x1 uint16	315	1.04401	102.231	-11.6573	1x75 double	75	TRUE	TRUE	[]	3910.09	1x75 double	0.878973	217	6.82669	11.9619	18.7886	77.94
011121_S009	4419	40x Water 2.78Hz	13812	[73.5000000000000,216.500000000000,161.500000000000,109,45,13]	13812x3 double	13812x1 uint16	[123.382169379049,240.528717016906,166.376086269553]	4692.22	28160	2658x2 double	2658	1x75 double	1x75 double	899	524.278	[261.643742714846,85.4196248807884,149.573063473562]	18x1 uint16	361	1.2328	3.10726	4.25772	1x75 double	75	TRUE	TRUE	[]	3319.91	1x75 double	0.410212	166	1.01	3.48125	4.49125	59.58
011121_S009	4419	40x Water 2.78Hz	1215	[32.5000000000000,876.500000000000,216.500000000000,21,14,9]	1215x3 double	1215x1 uint16	[43.1420017108640,883.504704875962,221.646278870830]	4926.16	23040	223x2 double	223	1x75 double	1x75 double	736	688.5	[275,108.534495279593,201]	[641;736]	392	1.03478	1.04471	4.56303	1x75 double	75	TRUE	TRUE	[]	3019.19	1x75 double	0.623574	221	0.79875	3.46776	4.26651	79.38
011121_S009	4419	40x Water 2.78Hz	1002	[95.5000000000000,93.5000000000000,203.500000000000,24,20,14]	1002x3 double	1002x1 uint16	[107.423667570009,105.098915989160,211.734869015357]	5656.53	23040	237x2 double	237	1x75 double	1x75 double	729	729	[290,38,189]	729	393	1.0614	5.82232	4.78512	1x75 double	75	TRUE	TRUE	[]	3672.57	1x75 double	0.579412	218	2.48118	4.09034	6.57152	78.3
011121_S009	4419	40x Water 2.78Hz	8808	[139.500000000000,11.5000000000000,236.500000000000,80,58,10]	8808x3 double	8808x1 uint16	[187.936798438263,32.3859199609566,241.392996583699]	4764.25	25600	1553x2 double	1553	1x75 double	1x75 double	607	607	[12,451,220]	607	428	1.15827	4.47225	2.56677	1x75 double	75	TRUE	TRUE	[]	3145.19	1x75 double	0.550839	240	0.517768	2.62131	3.13908	86.22
011121_S009	4419	40x Water 2.78Hz	883	[24.5000000000000,503.500000000000,63.5000000000000,12,13,11]	883x3 double	883x1 uint16	[29.6755555555556,510.232000000000,69.2942222222222]	3261.61	25600	121x2 double	121	1x75 double	1x75 double	440	212.778	[242.395300261097,306.441775456919,59.5300261096606]	[373;282;245;0;440;87;256;208;24]	454	1.07317	5.19196	5.38636	1x75 double	75	TRUE	TRUE	[]	2009.92	1x75 double	0.621053	70	1.62	1.413	3.033	25.02
011121_S009	4419	40x Water 2.78Hz	1230	[50.5000000000000,423.500000000000,127.500000000000,20,11,10]	1230x3 double	1230x1 uint16	[60.1711491442543,430.038712306438,132.588019559902]	5107.51	25600	175x2 double	175	1x75 double	1x75 double	291	291	[42,82,120]	291	472	1.16901	6.69805	5.07229	1x75 double	75	TRUE	TRUE	[]	3320.69	1x75 double	0.53304	134	1.82647	1.41	3.23647	48.06
011121_S019	4419	40x Water 2.78Hz	17644	[3.50000000000000,340.500000000000,50.5000000000000,70,126,14]	17644x3 double	17644x1 uint16	[36.5570994549191,407.034849432580,57.9179697971584]	3247.45	25600	3721x2 double	3721	1x100 double	1x100 double	11532	5893.76	[294.157842221600,251.258735718066,50.1265947510974]	109x1 uint16	18	1.0399	1.05014	5.6927	1x100 double	100	TRUE	FALSE	[]	2091.48	1x100 double	0.540789	58	1.38122	3.09561	4.47684	20.7
011121_S019	4419	40x Water 2.78Hz	2069	[32.5000000000000,47.5000000000000,296.500000000000,38,27,9]	2069x3 double	2069x1 uint16	[49.4608509116911,62.0479084733643,301.646764390418]	3460.76	20480	495x2 double	495	1x47 double	1x47 double	10912	3739.07	[294.642340422627,316.911236346894,284.965133307437]	431x1 uint16	24	1.29851	7.39073	3.87356	1x47 double	47	TRUE	FALSE	[]	2425.54	1x47 double	0.405117	302	1.152	1.1232	2.2752	108.54
011121_S019	4419	40x Water 2.78Hz	351	[73.5000000000000,393.500000000000,55.5000000000000,12,19,6]	351x3 double	351x1 uint16	[80.5025588536336,403.918116683726,58.9488229273286]	7125.7	28160	109x2 double	109	1x100 double	1x100 double	10766	6949.09	[88.0564127529416,426.385605738191,57.6214208513596]	705x1 uint16	27	1.31579	2.59096	4.30286	1x100 double	100	TRUE	TRUE	[]	5049.54	1x100 double	0.386047	60	0.87	0.292941	1.16294	21.42
011121_S019	4419	40x Water 2.78Hz	14425	[157.500000000000,477.500000000000,173.500000000000,111,57,20]	14425x3 double	14425x1 uint16	[201.511108223983,506.009841496687,180.767799142523]	5463.94	40960	2172x2 double	2172	1x100 double	1x100 double	8870	4198.42	[295.565891413307,820.862167789721,164.070182582795]	93x1 uint16	46	1.03134	7.0772	5.75	1x100 double	100	TRUE	TRUE	[]	3319.04	1x100 double	0.542969	189	5.28947	6.08504	11.3745	67.86
011121_S019	4419	40x Water 2.78Hz	1768	[235.500000000000,270.500000000000,191.500000000000,28,12,10]	1768x3 double	1768x1 uint16	[248.783114446529,276.977861163227,196.425140712946]	3858.82	25600	282x2 double	282	1x100 double	1x100 double	5520	4490.48	[291.021633085896,95.4603075291623,172.650222693531]	21x1 uint16	117	1.0411	1.01239	4.69737	1x100 double	100	TRUE	TRUE	[]	2478.3	1x100 double	0.659341	195	0.796154	3.56	4.35615	70.02
011121_S019	4419	40x Water 2.78Hz	3347	[116.500000000000,445.500000000000,43.5000000000000,37,22,14]	3347x3 double	3347x1 uint16	[136.618861364624,454.615601912212,50.3107344632768]	3519.9	20480	539x2 double	539	1x100 double	1x100 double	5144	2957.25	[6.12087726290110,174.659903626680,45.3866164269411]	56x1 uint16	134	1.07323	8.21306	5.02132	1x100 double	100	TRUE	TRUE	[]	2294.03	1x100 double	0.614907	62	5.16082	6.11746	11.2783	22.14
011121_S019	4419	40x Water 2.78Hz	1343	[141.500000000000,839.500000000000,65.5000000000000,19,16,11]	1343x3 double	1343x1 uint16	[151.872262773723,848.684914841849,71.5093268450933]	4700.64	28160	213x2 double	213	1x100 double	1x100 double	5065	3325.23	[185.447157472950,860.600324789126,66.6360267048837]	145x1 uint16	140	1.02899	5.67032	6.03286	1x100 double	100	TRUE	TRUE	[]	2884.51	1x100 double	0.579167	75	2.625	5.39455	8.01955	26.82
011121_S019	4419	40x Water 2.78Hz	705	[80.5000000000000,412.500000000000,53.5000000000000,17,20,8]	705x3 double	705x1 uint16	[88.2499068901304,425.341899441341,57.6532588454376]	9749.79	40960	182x2 double	182	1x100 double	1x100 double	4710	4403.25	[126.993073298132,437.003321410322,51.8874127065236]	[3966;4454;4428;4515;4710;4515;4311;4327]	157	1.01705	8.4552	4.03352	1x100 double	100	TRUE	TRUE	[]	7286.15	1x100 double	0.415058	65	3.81224	0.278417	4.09066	23.22
011121_S019	4419	40x Water 2.78Hz	5776	[156.500000000000,94.5000000000000,71.5000000000000,40,47,16]	5776x3 double	5776x1 uint16	[176.460700177088,120.769105026563,78.9540934477592]	3253.63	20480	815x2 double	815	1x100 double	1x100 double	4508	2732.43	[178.177715620153,62.1989857269828,70.9770394381416]	42x1 uint16	169	1.02439	8.36834	6.06463	1x100 double	100	TRUE	TRUE	[]	2151.66	1x100 double	0.470073	88	4.87765	2.088	6.96565	31.5
011121_S019	4419	40x Water 2.78Hz	3482	[5.50000000000000,968.500000000000,91.5000000000000,26,26,15]	3482x3 double	3482x1 uint16	[20.5725211690795,979.138759901666,97.6285167986889]	2691.6	20480	505x2 double	505	1x100 double	1x100 double	4458	2325.78	[293.980396372187,183.995512260665,88.0339670809540]	32x1 uint16	173	1.03061	6.90388	4.76238	1x100 double	100	TRUE	TRUE	[]	1764.12	1x100 double	0.494253	103	3.46966	3.90214	7.3718	36.9
011121_S019	4419	40x Water 2.78Hz	768	[120.500000000000,173.500000000000,74.5000000000000,37,10,9]	768x3 double	768x1 uint16	[143.712413261372,178.592906707787,78.6484194294526]	4323.33	20480	208x2 double	208	1x100 double	1x100 double	4286	2480.86	[26.5811931360129,62.5057199892510,73.8981918691696]	21x1 uint16	181	1.07216	2.93389	5.30769	1x100 double	100	TRUE	TRUE	[]	2941.54	1x100 double	0.564854	79	1.43053	4.2975	5.72803	28.26
011121_S019	4419	40x Water 2.78Hz	4966	[203.500000000000,947.500000000000,163.500000000000,44,40,10]	4966x3 double	4966x1 uint16	[226.929231111606,972.697563146768,168.043618560142]	4632.85	28160	899x2 double	899	1x100 double	1x100 double	3647	2358.1	[278.075128931205,47.9262390391376,155.944638240243]	31x1 uint16	206	1.18838	1.41611	4.72259	1x100 double	100	TRUE	TRUE	[]	2887.47	1x100 double	0.536489	167	0.887525	6.42429	7.31181	59.94
011121_S019	4419	40x Water 2.78Hz	24169	[2.50000000000000,102.500000000000,215.500000000000,75,65,19]	24169x3 double	24169x1 uint16	[35.6157605808394,131.073419514787,224.577545599433]	2990.67	28160	2891x2 double	2891	1x100 double	1x100 double	3472	1780.62	[275.893110173048,853.114937421314,205.517915771804]	91x1 uint16	218	1.04959	8.59273	5.53858	1x100 double	100	TRUE	TRUE	[]	1872.85	1x100 double	0.489835	238	6.53174	8.5344	15.0661	85.5
011121_S019	4419	40x Water 2.78Hz	3294	[40.5000000000000,182.500000000000,152.500000000000,34,23,11]	3294x3 double	3294x1 uint16	[57.3058252427185,195.612221587664,157.511422044546]	2721.65	17920	530x2 double	530	1x100 double	1x100 double	3382	3215.67	[117.664869907743,324.685705400643,144]	[3233;3032;3382]	224	1.03797	3.89217	4.7378	1x100 double	100	TRUE	TRUE	[]	1685.74	1x100 double	0.581662	160	2.24786	1.00047	3.24832	57.42
011121_S019	4419	40x Water 2.78Hz	1110	[136.500000000000,990.500000000000,138.500000000000,14,12,10]	1110x3 double	1110x1 uint16	[143.237793851718,996.752712477396,143.582278481013]	5101.55	28160	151x2 double	151	1x100 double	1x100 double	3235	2970.33	[22.8422174840085,283.503142183818,131.156828638761]	[3022;2761;3038;3235;2971;2795]	239	1.05263	2.0664	3.3	1x100 double	100	TRUE	TRUE	[]	3136.42	1x100 double	0.767568	141	0.345405	1.782	2.12741	50.58
011121_S019	4419	40x Water 2.78Hz	3513	[273.500000000000,455.500000000000,174.500000000000,25,52,14]	3513x3 double	3513x1 uint16	[290.274348057477,484.920170303353,180.779936136243]	2738.54	20480	607x2 double	607	1x100 double	1x100 double	3173	2409.5	[294.939783810296,657.523137580411,163.940896828840]	22x1 uint16	240	1.02667	7.60077	4.96753	1x100 double	100	TRUE	TRUE	[]	1838.81	1x100 double	0.509174	189	4.57846	1.78941	6.36787	67.86
011121_S019	4419	40x Water 2.78Hz	55457	[179.500000000000,146.500000000000,121.500000000000,118,111,19]	55457x3 double	55457x1 uint16	[239.446468149462,202.749915256447,130.517913483351]	3540.71	38400	6616x2 double	6616	1x100 double	1x100 double	2335	1570.53	[9.65693699731903,576.043364611260,118.091655495979]	19x1 uint16	301	1.03857	7.63209	6.5084	1x100 double	100	TRUE	TRUE	[]	2133.98	1x100 double	0.602539	135	3.35598	6.44062	9.7966	48.42
011121_S019	4419	40x Water 2.78Hz	2094	[152.500000000000,225.500000000000,232.500000000000,37,32,7]	2094x3 double	2094x1 uint16	[169.222956521739,240.382260869565,235.694956521739]	3514.8	20480	580x2 double	580	1x100 double	1x100 double	2252	1516.27	[79.8700374045030,18.0800321572818,222.969388000712]	137x1 uint16	308	1.04858	3.18353	4.47876	1x100 double	100	TRUE	TRUE	[]	2507.03	1x100 double	0.43662	236	0.907826	0.73125	1.63908	84.78
011121_S019	4419	40x Water 2.78Hz	4612	[37.5000000000000,43.5000000000000,213.500000000000,33,33,13]	4612x3 double	4612x1 uint16	[53.3753062891369,60.6426626735638,219.932616389872]	4077.57	23040	750x2 double	750	1x100 double	1x100 double	2210	1832.08	[10.9426879959693,217.399462568753,203.500440861569]	13x1 uint16	312	1.10339	5.08205	5.46204	1x100 double	100	TRUE	TRUE	[]	2679.47	1x100 double	0.471338	222	2.05604	7.04571	9.10176	79.74
011121_S019	4419	40x Water 2.78Hz	2999	[164.500000000000,37.5000000000000,110.500000000000,39,19,15]	2999x3 double	2999x1 uint16	[182.481375358166,48.7570837312958,118.212034383954]	2681.21	25600	424x2 double	424	1x100 double	1x100 double	1789	1221.29	[43.6307755293017,267.252544157211,106.654754942098]	14x1 uint16	345	1.23602	3.24302	3.1407	1x100 double	100	TRUE	TRUE	[]	1926.04	1x100 double	0.532915	121	1.308	4.95849	6.26649	43.38
011121_S026	4419	40x Water 2.78Hz	18896	[144.500000000000,258.500000000000,42.5000000000000,84,122,20]	18896x3 double	18896x1 uint16	[195.903891467185,323.571270905241,51.8477175432180]	5528.12	53733	2575x2 double	2575	1x100 double	1x100 double	17395	3344.92	[199.016188347598,327.560997570977,51.7529756676176]	18896x1 uint16	12	1.02031	7.42838	6.40621	1x100 double	100	TRUE	TRUE	[]	3291.51	1x100 double	0.615652	56	3.32591	7.22657	10.5525	19.98
011121_S026	4419	40x Water 2.78Hz	17595	[107.500000000000,821.500000000000,67.5000000000000,93,90,13]	17595x3 double	17595x1 uint16	[148.113595698931,870.868893360916,72.0687148862975]	7690.13	46109	3689x2 double	3689	1x100 double	1x100 double	15177	4387.23	[146.624466598481,874.914853611046,72.0229563318329]	17595x1 uint16	13	1.09863	0.49343	4.04044	1x100 double	100	TRUE	TRUE	[]	5011	1x100 double	0.574609	71	0.497044	1.3884	1.88544	25.38
011121_S026	4419	40x Water 2.78Hz	763	[89.5000000000000,739.500000000000,291.500000000000,25,9,11]	763x3 double	763x1 uint16	[104.828058216754,743.137061672452,296.660389611828]	4141.17	20450	144x2 double	144	1x52 double	1x52 double	11223	4182.98	[26.4144798967244,723.737300730340,297.589655907466]	240x1 uint16	20	1.28775	2.88615	3.04445	1x52 double	52	TRUE	TRUE	[]	3013.05	1x52 double	0.605899	301	0.591104	0.642812	1.23392	108.18
011121_S026	4419	40x Water 2.78Hz	744	[227.500000000000,314.500000000000,45.5000000000000,14,11,12]	744x3 double	744x1 uint16	[234.923524410844,321.202017675245,52.0790730177665]	6039.37	35836	116x2 double	116	1x100 double	1x100 double	7639	3061.22	[234.916312228628,320.112382653458,51.9745577372869]	744x1 uint16	26	1.02996	7.61065	5.61646	1x100 double	100	TRUE	TRUE	[]	3293.22	1x100 double	0.717057	61	4.1866	4.00426	8.19087	21.78
011121_S026	4419	40x Water 2.78Hz	994	[121.500000000000,300.500000000000,42.5000000000000,15,15,14]	994x3 double	994x1 uint16	[126.632682031300,307.984329549778,49.6050813016990]	6462.01	23080	153x2 double	153	1x100 double	1x100 double	5473	2227.97	[126.485444775580,308.567650139980,48.9178167614919]	994x1 uint16	38	1.11144	4.57695	5.00385	1x100 double	100	TRUE	TRUE	[]	3518.3	1x100 double	1.06517	62	3.95281	5.45648	9.40929	22.14
011121_S026	4419	40x Water 2.78Hz	751	[139.500000000000,621.500000000000,33.5000000000000,19,21,9]	751x3 double	751x1 uint16	[148.866895955386,633.839363173252,37.4754506700002]	6167.4	20513	183x2 double	183	1x100 double	1x100 double	4289	1814.7	[148.736782207169,633.411667245115,37.5503899574492]	751x1 uint16	42	1.01582	4.18645	4.81484	1x100 double	100	TRUE	TRUE	[]	4130.38	1x100 double	0.500945	36	0.860744	7.85116	8.7119	12.78
011121_S026	4419	40x Water 2.78Hz	575	[124.500000000000,283.500000000000,46.5000000000000,17,15,7]	575x3 double	575x1 uint16	[133.101241489149,291.736293400106,49.7571664640392]	5232.71	30745	139x2 double	139	1x100 double	1x100 double	3856	1590.07	[132.573237783677,292.068936627259,49.7039021578516]	575x1 uint16	47	1.09438	9.42507	4.37222	1x100 double	100	TRUE	TRUE	[]	2973.03	1x100 double	0.983102	73	7.90291	0.899915	8.80282	26.1
011121_S026	4419	40x Water 2.78Hz	638	[167.500000000000,340.500000000000,46.5000000000000,13,18,13]	638x3 double	638x1 uint16	[174.787704667024,350.065149465842,52.6087851415664]	5563.65	23075	139x2 double	139	1x100 double	1x100 double	3254	1576.32	[174.237855838137,350.027015309902,52.8863425969659]	638x1 uint16	50	1.14051	4.4541	4.74659	1x100 double	100	TRUE	TRUE	[]	3064.47	1x100 double	0.796916	56	2.12638	7.54463	9.67101	19.98
011121_S026	4419	40x Water 2.78Hz	140404	[83.5000000000000,742.500000000000,279.500000000000,144,214,31]	140404x3 double	140404x1 uint16	[154.309507998602,856.283418401004,292.356223466286]	8724.97	65535	10123x2 double	10123	1x57 double	1x57 double	1941	1514.2	[7,488.275260863823,280.453440760798]	[831;1941;1366;1884;1549]	70	1.00294	10.5126	1.13255	1x57 double	57	TRUE	TRUE	[]	4064.63	1x57 double	1.28418	300	4.83033	4.8276	9.65793	107.82
011121_S026	4419	40x Water 2.78Hz	1136	[93.5000000000000,187.500000000000,153.500000000000,25,18,8]	1136x3 double	1136x1 uint16	[108.562633757843,196.849325299073,157.103848398138]	4139.55	23042	244x2 double	244	1x100 double	1x100 double	1238	608.857	[47.8126466447677,676.378108869076,154.921867667762]	14x1 uint16	91	1.03803	4.0897	5.39828	1x100 double	100	TRUE	TRUE	[]	2755.71	1x100 double	0.4153	159	1.88431	0.500751	2.38506	57.06
011121_S026	4419	40x Water 2.78Hz	1531	[157.500000000000,224.500000000000,114.500000000000,46,20,9]	1531x3 double	1531x1 uint16	[182.784232991217,235.520313010952,118.178303653898]	4554.07	23036	389x2 double	389	1x100 double	1x100 double	485	443	[30,800,115.452595936795]	[485;401]	114	1.0004	2.47625	5.7049	1x100 double	100	TRUE	TRUE	[]	3001.7	1x100 double	0.44627	118	1.20788	2.57328	3.78116	42.3
011121_S031	4419	40x Water 2.78Hz	1128	[30.5000000000000,496.500000000000,303.500000000000,14,15,12]	1128x3 double	1128x1 uint16	[37.6745594713656,505.038546255507,310.349118942731]	4121.42	28160	160x2 double	160	1x39 double	1x39 double	35403	11523.5	[8.26806189435454,498.938403144937,282.159638500972]	432x1 uint16	4	1.42	4.70891	1.77465	1x39 double	39	TRUE	TRUE	[]	2512	1x39 double	0.757962	312	2.24053	1.62	3.86053	112.14
011121_S031	4419	40x Water 2.78Hz	5350	[167.500000000000,809.500000000000,226.500000000000,67,57,9]	5350x3 double	5350x1 uint16	[204.061913696060,837.271693245779,230.142823639775]	4080.69	23040	1299x2 double	1299	1x100 double	1x100 double	21250	5954.05	[7.52170172664733,1012.02080060312,222.519492371967]	401x1 uint16	15	1.08223	4.84687	2.77451	1x100 double	100	TRUE	TRUE	[]	2703.86	1x100 double	0.503644	229	0.561818	2.38431	2.94613	82.26
011121_S031	4419	40x Water 2.78Hz	5835	[16.5000000000000,320.500000000000,29.5000000000000,53,30,11]	5835x3 double	5835x1 uint16	[37.7145235452672,332.260662755668,34.4050261614080]	5534.16	43520	876x2 double	876	1x100 double	1x100 double	18480	7068.35	[7.46404951354668,937.079230907843,31.7697340106300]	190x1 uint16	16	1.20301	2.3662	5.35992	1x100 double	100	TRUE	TRUE	[]	3346.12	1x100 double	0.727511	35	1.33787	1.45636	2.79423	12.42
011121_S031	4419	40x Water 2.78Hz	3715	[139.500000000000,494.500000000000,304.500000000000,42,38,13]	3715x3 double	3715x1 uint16	[166.557665038601,512.798093587522,311.383251930046]	8747.41	53760	637x2 double	637	1x38 double	1x38 double	17250	6236.93	[35.8586665841844,993.138523443840,283.126105027871]	508x1 uint16	20	1.17762	17.8221	-0.758673	1x38 double	38	TRUE	TRUE	[]	6132.75	1x38 double	0.535387	316	2.86676	5.34687	8.21363	113.58
011121_S031	4419	40x Water 2.78Hz	925	[0.500000000000000,737.500000000000,23.5000000000000,18,27,8]	925x3 double	925x1 uint16	[7.21084234002402,749.116658088866,26.2120432321153]	16132.2	43520	265x2 double	265	1x100 double	1x100 double	6879	3152.77	[71.9412558282144,657.363744013195,24.2220124123785]	150x1 uint16	85	1.12005	1.07005	3.5067	1x100 double	100	TRUE	TRUE	[]	11350.9	1x100 double	0.444255	25	0.551941	3.43742	3.98936	8.82
011121_S031	4419	40x Water 2.78Hz	3656	[200.500000000000,573.500000000000,205.500000000000,30,28,11]	3656x3 double	3656x1 uint16	[217.419783873649,586.057980049875,211.047589359934]	3369.45	40960	560x2 double	560	1x100 double	1x100 double	6174	2393.87	[14.0530184810844,854.042565552872,194.551157888672]	87x1 uint16	100	1.01942	1.57236	5.60571	1x100 double	100	TRUE	TRUE	[]	2157.71	1x100 double	0.563559	211	1.44263	2.44328	3.88591	75.78
011121_S031	4419	40x Water 2.78Hz	56726	[42.5000000000000,479.500000000000,299.500000000000,119,91,19]	56726x3 double	56726x1 uint16	[87.0942379794817,522.521002430885,310.177361872193]	4381.32	51200	5266x2 double	5266	1x39 double	1x39 double	5326	3593.1	[227.053530377668,791.582494225042,275.937296484929]	50x1 uint16	112	1.08822	4.93706	2.41777	1x39 double	39	TRUE	TRUE	[]	2458.4	1x39 double	0.902709	315	3.24952	2.41699	5.66652	113.22
011121_S031	4419	40x Water 2.78Hz	1576	[40.5000000000000,848.500000000000,33.5000000000000,22,15,11]	1576x3 double	1576x1 uint16	[51.9792274052478,856.235058309038,39.3997813411079]	4457.26	25600	253x2 double	253	1x100 double	1x100 double	4925	2860	[6.42700812700813,812.464959364959,34.0725855225855]	37x1 uint16	129	1.31128	1.44388	4.50742	1x100 double	100	TRUE	TRUE	[]	2823.08	1x100 double	0.594982	38	0.670909	3.31024	3.98115	13.5
011121_S031	4419	40x Water 2.78Hz	9725	[229.500000000000,277.500000000000,252.500000000000,62,44,13]	9725x3 double	9725x1 uint16	[264.503359959427,297.317991631799,258.548560923038]	4152.33	33280	1280x2 double	1280	1x90 double	1x90 double	4849	2571.75	[7.16794659926768,930.918181523606,236.278150416383]	12x1 uint16	131	1.06572	4.3496	6.10997	1x90 double	90	TRUE	TRUE	[]	2658	1x90 double	0.51693	260	2.16247	7.1597	9.32217	93.42
011121_S031	4419	40x Water 2.78Hz	1324	[136.500000000000,472.500000000000,110.500000000000,40,19,8]	1324x3 double	1324x1 uint16	[162.872520766232,479.935751822343,113.368537040176]	11405.9	43520	384x2 double	384	1x100 double	1x100 double	3824	2205.21	[16.4450164717180,497.011176760873,104.166424370140]	34x1 uint16	168	1.10127	1.31198	3.77139	1x100 double	100	TRUE	TRUE	[]	8566.67	1x100 double	0.322179	111	0.407788	3.57103	3.97882	39.78
011121_S031	4419	40x Water 2.78Hz	3114	[152.500000000000,667.500000000000,225.500000000000,36,26,10]	3114x3 double	3114x1 uint16	[169.050841190608,676.886485487151,230.124052505084]	4446.71	38400	507x2 double	507	1x100 double	1x100 double	2996	1628	[16.2390227470873,853.523975588492,212.012106681462]	31x1 uint16	212	1.06408	2.73921	5.62758	1x100 double	100	TRUE	TRUE	[]	2751.87	1x100 double	0.644037	231	1.49756	2.49632	3.99388	82.98
011121_S031	4419	40x Water 2.78Hz	2131	[245.500000000000,822.500000000000,100.500000000000,16,32,13]	2131x3 double	2131x1 uint16	[253.689435046282,838.318225343122,106.440791573572]	3763.72	30720	311x2 double	311	1x100 double	1x100 double	2703	1552	[202.822003865979,583.742375429553,94.8663552405498]	12x1 uint16	231	1.07722	4.50156	5.58065	1x100 double	100	TRUE	TRUE	[]	2181.35	1x100 double	0.611321	108	2.20941	4.58308	6.79249	38.7
011121_S031	4419	40x Water 2.78Hz	1095	[162.500000000000,536.500000000000,307.500000000000,17,25,10]	1095x3 double	1095x1 uint16	[170.336609336609,547.880835380835,312.379115479115]	9515.25	40960	250x2 double	250	1x37 double	1x37 double	2477	1851.8	[16.4639809914678,836.464737012636,282.139107895021]	[1849;1826;1819;2477;1288]	247	1.15625	16.0385	-0.763514	1x37 double	37	TRUE	TRUE	[]	6277.12	1x37 double	0.559543	315	1.65349	3.07612	4.72961	113.22
011121_S031	4419	40x Water 2.78Hz	24161	[44.5000000000000,152.500000000000,311.500000000000,66,69,14]	24161x3 double	24161x1 uint16	[80.5121239201668,184.681044583457,318.375394697647]	5335.41	40960	2791x2 double	2791	1x31 double	1x31 double	2239	1802.33	[71.3453301276124,681.858442759386,284.507564268541]	15x1 uint16	263	1.02918	18.828	1.62595	1x31 double	31	TRUE	TRUE	[]	3022.29	1x31 double	0.732625	318	1.25255	[]	[]	114.3
011121_S031	4419	40x Water 2.78Hz	3122	[2.50000000000000,52.5000000000000,154.500000000000,34,30,12]	3122x3 double	3122x1 uint16	[20.8248018847719,61.2910687513386,160.476761619190]	3828.52	28160	448x2 double	448	1x100 double	1x100 double	1977	917.818	[52.0573494453249,675.765550713154,144.645503169572]	11x1 uint16	282	1.16268	7.42092	4.55556	1x100 double	100	TRUE	TRUE	[]	2205.71	1x100 double	0.53886	163	2.62025	3.144	5.76425	58.5
011121_S031	4419	40x Water 2.78Hz	1267	[98.5000000000000,386.500000000000,109.500000000000,30,22,8]	1267x3 double	1267x1 uint16	[111.926024481107,394.396487493348,112.538052155402]	3796.56	23040	301x2 double	301	1x100 double	1x100 double	1934	1637.4	[289.608281421766,419.829363625260,101.548308293636]	[1764;1934;1443;1397;1649]	285	1.38683	1.19254	3.53412	1x100 double	100	TRUE	TRUE	[]	2551.5	1x100 double	0.593333	111	0.512727	0.709714	1.22244	39.78
011121_S031	4419	40x Water 2.78Hz	2929	[7.50000000000000,845.500000000000,259.500000000000,25,29,17]	2929x3 double	2929x1 uint16	[25.1509202453988,862.501431492843,266.449488752556]	2136.98	20480	469x2 double	469	1x83 double	1x83 double	1915	1832	[7,459.477347161572,241.522652838428]	[1749;1915]	289	1	3.13466	5.10345	1x83 double	83	TRUE	TRUE	[]	966.141	1x83 double	0.717514	266	1.37368	4.23947	5.61316	95.58
011121_S031	4419	40x Water 2.78Hz	12082	[130.500000000000,649.500000000000,176.500000000000,34,35,23]	12082x3 double	12082x1 uint16	[146.169158532065,667.747889122287,187.656987520079]	5144.37	40960	888x2 double	888	1x100 double	1x100 double	1810	1798	[120,178,163.503337041157]	[1786;1810]	299	1.1318	2.51438	4.44396	1x100 double	100	TRUE	TRUE	[]	2551.35	1x100 double	1.09831	193	2.09213	20.1496	22.2417	69.3
011121_S031	4419	40x Water 2.78Hz	31337	[120.500000000000,316.500000000000,106.500000000000,67,153,11]	31337x3 double	31337x1 uint16	[156.167100041002,400.655355514465,112.225466433561]	12347.2	65535	5940x2 double	5940	1x100 double	1x100 double	1748	1553	[33,675,100.437218287186]	[1748;1358]	303	1.03833	0.400492	4.25243	1x100 double	100	TRUE	TRUE	[]	7765.33	1x100 double	0.573205	111	0.556909	2.38423	2.94114	39.78
011121_S031	4419	40x Water 2.78Hz	22534	[51.5000000000000,219.500000000000,160.500000000000,90,69,13]	22534x3 double	22534x1 uint16	[93.1378519720741,257.353891336270,166.876162506118]	4409.85	43520	2991x2 double	2991	1x100 double	1x100 double	1722	1576	[43.5310913705584,593.481123096447,154]	[1549;1407;1722;1626]	305	1.01245	1.86502	5.93043	1x100 double	100	TRUE	TRUE	[]	2531.76	1x100 double	0.740703	167	1.47344	4.0513	5.52475	59.94
011121_S031	4419	40x Water 2.78Hz	2498	[0.500000000000000,663.500000000000,22.5000000000000,17,53,10]	2498x3 double	2498x1 uint16	[7.84400360685302,696.423579801623,27.2082957619477]	4546.1	30720	525x2 double	525	1x100 double	1x100 double	1707	1072.67	[189.890926041019,335.873316759892,22.7346177750155]	[1004;987;1596;847;963;1707;727;798;1025]	306	1.18653	2.91931	4.77293	1x100 double	100	TRUE	TRUE	[]	3876.57	1x100 double	0.493082	29	1.90708	2.19913	4.10621	10.26
011121_S031	4419	40x Water 2.78Hz	29147	[163.500000000000,791.500000000000,98.5000000000000,81,88,16]	29147x3 double	29147x1 uint16	[199.823966550705,842.771702026884,106.783690202035]	5377.61	56320	3277x2 double	3277	1x100 double	1x100 double	1403	1278.5	[120.494915917090,383.473797418850,93]	[1403;1180;1288;1243]	325	1.00382	3.97959	4.77063	1x100 double	100	TRUE	TRUE	[]	2800.61	1x100 double	0.801674	104	0.637391	8.37551	9.0129	37.26
011121_S031	4419	40x Water 2.78Hz	308	[0.500000000000000,720.500000000000,24.5000000000000,13,12,6]	308x3 double	308x1 uint16	[5.78487972508591,726.635738831615,26.1828178694158]	12093.5	30720	120x2 double	120	1x100 double	1x100 double	1182	870.5	[37.9226019529006,682.893595634693,24.6273693279724]	[713;1182;700;741;735;948;1166;779]	341	1.00654	2.7691	3.0974	1x100 double	100	TRUE	TRUE	[]	8917.33	1x100 double	0.478469	24	0.233766	5.85957	6.09334	8.46
011121_S031	4419	40x Water 2.78Hz	3013	[239.500000000000,672.500000000000,283.500000000000,22,42,11]	3013x3 double	3013x1 uint16	[251.339212733921,692.518391051839,288.823617982362]	3950.03	30720	553x2 double	553	1x60 double	1x60 double	1081	648.273	[292.623054270088,941.763146823727,264.330528677605]	11x1 uint16	347	1.02454	4.69969	2.76048	1x60 double	60	TRUE	TRUE	[]	2680.36	1x60 double	0.379965	286	0.190385	4.62857	4.81896	102.78
011121_S031	4419	40x Water 2.78Hz	1024	[24.5000000000000,416.500000000000,274.500000000000,19,12,11]	1024x3 double	1024x1 uint16	[33.1309178743961,422.585507246377,280.424637681159]	5175	28160	175x2 double	175	1x69 double	1x69 double	941	696	[102.729406130268,437,257.278735632184]	[565;941;582]	356	1.07246	8.11811	1.93243	1x69 double	69	TRUE	TRUE	[]	3189.03	1x69 double	0.633028	278	0.335676	1.8	2.13568	99.9
011121_S036	4419	40x Water 2.78Hz	1734	[45.5000000000000,157.500000000000,21.5000000000000,27,29,7]	1734x3 double	1734x1 uint16	[60.3993421052632,173.832456140351,25.0164473684211]	6732.18	25600	403x2 double	403	1x100 double	1x100 double	11867	4358.02	[61.0921345483615,175.120111840887,25.0207516216836]	1734x1 uint16	14	1.07033	2.32045	4.48255	1x100 double	100	TRUE	TRUE	[]	4967.54	1x100 double	0.37468	25	0.883846	1.30935	2.1932	8.82
011121_S036	4419	40x Water 2.78Hz	878	[8.50000000000000,156.500000000000,21.5000000000000,22,13,8]	878x3 double	878x1 uint16	[21.1194539249147,162.678693320332,25.3120429058996]	5980.14	23040	201x2 double	201	1x100 double	1x100 double	11330	4762.72	[21.1786767436638,161.872808919118,25.3799387278142]	878x1 uint16	17	1	2.61273	4.41277	1x100 double	100	TRUE	TRUE	[]	4444.98	1x100 double	0.398281	25	0.771864	0.664364	1.79623	8.82
011121_S036	4419	40x Water 2.78Hz	423	[275.500000000000,799.500000000000,21.5000000000000,15,8,7]	423x3 double	423x1 uint16	[284.202450032237,803.620889748549,24.8620245003224]	9386.67	33280	89x2 double	89	1x100 double	1x100 double	9093	4092	[284.400176207382,803.982018181136,24.8712981284465]	423x1 uint16	29	1.31169	2.11733	3.17822	1x100 double	100	TRUE	TRUE	[]	7593.71	1x100 double	0.30303	23	0.327273	0.48	0.807273	8.1
011121_S036	4419	40x Water 2.78Hz	1185	[156.500000000000,188.500000000000,136.500000000000,26,16,7]	1185x3 double	1185x1 uint16	[168.782060972537,196.628621819098,140.027210884354]	8574.38	35840	292x2 double	292	1x100 double	1x100 double	8540	2905.43	[294.753631006723,654.017821835349,137.338551405291]	141x1 uint16	33	1.08163	0.812986	4.46751	1x100 double	100	TRUE	TRUE	[]	6654.25	1x100 double	0.288538	139	0.600674	1.96326	2.56393	49.86
011121_S036	4419	40x Water 2.78Hz	1929	[96.5000000000000,465.500000000000,268.500000000000,24,13,11]	1929x3 double	1929x1 uint16	[108.768649843433,472.238349603979,274.472278504329]	7204.89	28160	269x2 double	269	1x75 double	1x75 double	7851	3175.07	[294.414742146582,986.723240052726,262.660632006252]	135x1 uint16	38	1.36842	6.64097	4.11538	1x75 double	75	TRUE	TRUE	[]	5215.17	1x75 double	0.399635	277	2.32435	2.4552	4.77955	99.54
011121_S036	4419	40x Water 2.78Hz	3628	[36.5000000000000,286.500000000000,96.5000000000000,56,35,10]	3628x3 double	3628x1 uint16	[60.1283449979415,305.040757513380,102.164882667765]	6855.83	28160	751x2 double	751	1x100 double	1x100 double	5937	2502.77	[294.936876741765,459.361289997650,97.3308733169929]	119x1 uint16	61	1.17784	1.02495	4.71991	1x100 double	100	TRUE	TRUE	[]	5123.41	1x100 double	0.349301	102	0.892	4.11517	5.00717	36.54
011121_S036	4419	40x Water 2.78Hz	5128	[122.500000000000,74.5000000000000,312.500000000000,82,28,9]	5128x3 double	5128x1 uint16	[166.103617589718,87.3639974005343,317.106144848003]	6913.7	30720	1157x2 double	1157	1x32 double	1x32 double	5444	2470.02	[7.38064190607977,928.642631192539,302.886124060752]	134x1 uint16	70	1.09058	4.15827	2.26744	1x32 double	32	TRUE	TRUE	[]	5283.73	1x32 double	0.325377	316	0.468844	1.36761	1.83645	113.58
011121_S036	4419	40x Water 2.78Hz	1528	[81.5000000000000,351.500000000000,147.500000000000,21,13,12]	1528x3 double	1528x1 uint16	[92.4155610523949,357.659545761187,153.258601304250]	7450.47	28160	231x2 double	231	1x100 double	1x100 double	4436	2154.34	[104.204313775043,95.5019224768619,147.548180545205]	180x1 uint16	97	1.35	4.76059	4.70899	1x100 double	100	TRUE	TRUE	[]	5518.96	1x100 double	0.423695	158	1.77623	0.956842	2.73307	56.7
011121_S036	4419	40x Water 2.78Hz	618	[144.500000000000,523.500000000000,108.500000000000,19,14,7]	618x3 double	618x1 uint16	[155.238374938815,529.118453255017,111.883015173764]	8462.91	30720	174x2 double	174	1x100 double	1x100 double	4329	3175.55	[24.4733041920029,321.890772495183,107.767186761938]	42x1 uint16	100	1.14876	1.73678	3.48921	1x100 double	100	TRUE	TRUE	[]	6400	1x100 double	0.303448	110	0.266966	1.89176	2.15873	39.42
011121_S036	4419	40x Water 2.78Hz	3248	[224.500000000000,196.500000000000,203.500000000000,50,26,13]	3248x3 double	3248x1 uint16	[249.046812981555,209.481321503619,209.399136119542]	6751.53	30720	595x2 double	595	1x100 double	1x100 double	3817	1845.81	[294.965431018316,944.917567877310,198.253672563606]	26x1 uint16	118	1.08814	5.05446	4.98754	1x100 double	100	TRUE	TRUE	[]	5012.44	1x100 double	0.366524	213	2.69079	7.67571	10.3665	76.5
011121_S036	4419	40x Water 2.78Hz	117	[256.500000000000,412.500000000000,263.500000000000,9,8,4]	117x3 double	117x1 uint16	[260.619047619048,417.222222222222,265.355555555556]	6892.31	28160	50x2 double	50	1x84 double	1x84 double	3429	1899.62	[153.741190343332,773.327876101536,258.636622061254]	50x1 uint16	135	1.33962	1.8103	3.22535	1x84 double	84	TRUE	TRUE	[]	5324.8	1x84 double	0.846154	273	0.293333	2.52	2.81333	98.1
011121_S036	4419	40x Water 2.78Hz	36839	[176.500000000000,471.500000000000,105.500000000000,123,103,12]	36839x3 double	36839x1 uint16	[258.327099216197,516.896900498134,111.271313538896]	7784.31	61440	6156x2 double	6156	1x100 double	1x100 double	2884	2412.92	[236.929304092557,422.958780866862,103.963615955793]	24x1 uint16	162	1.03306	1.12606	5.94054	1x100 double	100	TRUE	TRUE	[]	5405.28	1x100 double	0.373904	111	1.15322	2.61209	3.76531	39.78
011121_S036	4419	40x Water 2.78Hz	1894	[131.500000000000,492.500000000000,108.500000000000,42,27,8]	1894x3 double	1894x1 uint16	[149.036155202822,505.265432098765,112.038139329806]	6131.02	25600	488x2 double	488	1x100 double	1x100 double	2436	2301.83	[277.515096662081,681.488885670842,105]	[2177;2318;2330;2436;2245;2305]	186	1.23245	1.07321	4.94892	1x100 double	100	TRUE	TRUE	[]	4952.13	1x100 double	0.286017	111	0.852414	2.35525	3.20767	39.78
011121_S036	4419	40x Water 2.78Hz	1391	[250.500000000000,713.500000000000,96.5000000000000,32,11,8]	1391x3 double	1391x1 uint16	[266.176338659938,718.667788057191,100.261003644519]	6564.72	28160	268x2 double	268	1x100 double	1x100 double	2327	1575.21	[295.175455878812,927.287778288566,96.2631947636873]	29x1 uint16	193	1.09353	1.42574	4.58553	1x100 double	100	TRUE	TRUE	[]	4499.1	1x100 double	0.424628	99	0.701053	4.968	5.66905	35.46
011121_S036	4419	40x Water 2.78Hz	2186	[209.500000000000,781.500000000000,66.5000000000000,41,13,12]	2186x3 double	2186x1 uint16	[234.195059934617,787.637123138395,72.7582637123138]	6448.01	38400	338x2 double	338	1x100 double	1x100 double	2148	1244.17	[219.719231619346,146.217272489802,68.6581771053107]	80x1 uint16	207	1.03783	1.86674	4.79499	1x100 double	100	TRUE	TRUE	[]	4498.93	1x100 double	0.474747	72	0.350069	2.79111	3.14118	25.74
011121_S036	4419	40x Water 2.78Hz	7817	[258.500000000000,325.500000000000,213.500000000000,42,86,10]	7817x3 double	7817x1 uint16	[286.126462056704,373.431482174605,217.152942827735]	13999.6	64000	1896x2 double	1896	1x100 double	1x100 double	2004	1295.33	[16.3266468392077,482.692045814086,206.256267797254]	61x1 uint16	221	1.03064	1.03273	3.53753	1x100 double	100	TRUE	TRUE	[]	10495.2	1x100 double	0.276213	215	0.21118	3.52563	3.73681	77.22
011121_S036	4419	40x Water 2.78Hz	859	[279.500000000000,317.500000000000,122.500000000000,15,12,9]	859x3 double	859x1 uint16	[286.299081766506,323.617402710975,127.191954525579]	6815.74	23040	146x2 double	146	1x100 double	1x100 double	1807	1025.05	[100.222893245378,878.723311344421,121.823701570194]	21x1 uint16	239	1.16568	2.50652	5.25381	1x100 double	100	TRUE	TRUE	[]	4453.7	1x100 double	0.507874	127	1.28618	2.12927	3.41545	45.54
011121_S036	4419	40x Water 2.78Hz	14271	[185.500000000000,400.500000000000,265.500000000000,87,50,15]	14271x3 double	14271x1 uint16	[237.711893434824,429.634823977165,274.705661274976]	7541.34	48640	2151x2 double	2151	1x74 double	1x74 double	1259	1101.4	[73.6097693844198,642.977664790267,259.182858180498]	[1180;969;1092;1259;1007]	302	1.01811	2.30555	6.04975	1x74 double	74	TRUE	TRUE	[]	5078.34	1x74 double	0.470588	276	1.54809	3.816	5.36409	99.18
011121_S036	4419	40x Water 2.78Hz	4867	[243.500000000000,935.500000000000,253.500000000000,33,29,28]	4867x3 double	4867x1 uint16	[256.702943124823,951.348537901013,267.789344184726]	5558.15	28160	531x2 double	531	1x81 double	1x81 double	1215	1051.67	[147.300792393027,961.314104595880,248]	[1215;991;949]	307	1.07407	2.49932	4.99569	1x81 double	81	TRUE	TRUE	[]	3591.71	1x81 double	0.574497	274	1.68779	7.41474	9.10253	98.46
011121_S036	4419	40x Water 2.78Hz	1288	[102.500000000000,320.500000000000,216.500000000000,25,21,8]	1288x3 double	1288x1 uint16	[114.207960506017,327.374267201481,220.386917618019]	6441.74	25600	293x2 double	293	1x100 double	1x100 double	1203	969	[241.566821465428,793.524509803922,208]	[849;830;994;1203]	310	1.07767	1.90451	4.55556	1x100 double	100	TRUE	TRUE	[]	4482.18	1x100 double	0.419103	220	0.911707	1.635	2.54671	79.02
011121_S036	4419	40x Water 2.78Hz	900	[268.500000000000,563.500000000000,291.500000000000,14,13,10]	900x3 double	900x1 uint16	[275.000958772771,568.564237775647,296.069511025887]	5933.51	25600	144x2 double	144	1x53 double	1x53 double	960	742.143	[113.594610202117,943.568623676612,284.368816169394]	[712;789;960;818;605;569;742]	334	1.33333	2.88704	2.61458	1x53 double	53	TRUE	TRUE	[]	4142.22	1x53 double	0.566524	296	0.945	1.00528	1.95028	106.38
011121_S036	4419	40x Water 2.78Hz	1511	[143.500000000000,167.500000000000,138.500000000000,29,15,11]	1511x3 double	1511x1 uint16	[159.879203658865,175.684691955878,143.784503631961]	6297.5	25600	254x2 double	254	1x100 double	1x100 double	903	787	[147.311944091487,483.693985599322,137.462515883100]	[808;903;827;637;901;646]	337	1.12179	3.70594	5.46857	1x100 double	100	TRUE	TRUE	[]	4253.23	1x100 double	0.450237	145	2.1	1.24875	3.34875	52.02
011121_S036	4419	40x Water 2.78Hz	29313	[207.500000000000,57.5000000000000,54.5000000000000,92,96,18]	29313x3 double	29313x1 uint16	[276.122685329834,110.635787039930,64.4523630985857]	8385.57	64000	4132x2 double	4132	1x100 double	1x100 double	589	589	[145,445,54]	589	362	1.02591	2.20958	6.13278	1x100 double	100	TRUE	TRUE	[]	5852.93	1x100 double	0.413465	64	1.2194	4.88921	6.10861	22.86
011121_S036	4419	40x Water 2.78Hz	7028	[11.5000000000000,51.5000000000000,96.5000000000000,38,69,13]	7028x3 double	7028x1 uint16	[33.8263400576369,88.2758501440922,103.271296829971]	6319.86	28160	1227x2 double	1227	1x100 double	1x100 double	494	494	[227,320,95]	494	367	1.01634	4.77757	5.53376	1x100 double	100	TRUE	TRUE	[]	4796.61	1x100 double	0.30013	107	2.67458	2.286	4.96058	38.34
011121_S038	4419	40x Water 2.78Hz	711	[133.500000000000,533.500000000000,19.5000000000000,31,14,5]	711x3 double	711x1 uint16	[144.649537037037,540.801851851852,21.1574074074074]	7777.22	30720	271x2 double	271	1x100 double	1x100 double	28051	8456.5	[144.434795646590,540.034054300205,20.8378167154367]	711x1 uint16	6	1.18009	5.88465	4.62249	1x100 double	100	TRUE	TRUE	[]	4874.39	1x100 double	0.573643	20	2.73789	15.2153	17.9532	7.02
011121_S038	4419	40x Water 2.78Hz	18015	[255.500000000000,534.500000000000,207.500000000000,45,125,13]	18015x3 double	18015x1 uint16	[287.515621779004,608.157250262245,213.471849400478]	12980.4	65535	3251x2 double	3251	1x100 double	1x100 double	7551	3675.57	[256.680874504439,122.797426444464,203.515330138101]	425x1 uint16	65	1.01192	1.68921	5.78159	1x100 double	100	TRUE	TRUE	[]	8545.41	1x100 double	0.344176	214	1.45644	2.19437	3.65081	76.86
011121_S038	4419	40x Water 2.78Hz	912	[224.500000000000,590.500000000000,210.500000000000,20,16,7]	912x3 double	912x1 uint16	[234.853000000000,599.329000000000,214.069666666667]	8421.05	35840	212x2 double	212	1x100 double	1x100 double	5492	2999.95	[273.755846548765,884.189703774863,203.903820007664]	127x1 uint16	94	1.10409	1.47449	4.95286	1x100 double	100	TRUE	TRUE	[]	6110.19	1x100 double	0.33004	214	0.9	1.32712	2.22712	76.86
011121_S038	4419	40x Water 2.78Hz	1970	[6.50000000000000,384.500000000000,255.500000000000,35,16,11]	1970x3 double	1970x1 uint16	[21.9642328042328,391.294179894180,260.364444444444]	6140.1	25600	321x2 double	321	1x89 double	1x89 double	3591	2484.89	[87.4113977821499,895.281948667501,244.663879449115]	18x1 uint16	160	1.00781	4.28776	5.31783	1x89 double	89	TRUE	TRUE	[]	4234.77	1x89 double	0.369115	261	2.04324	4.032	6.07524	93.78
011121_S038	4419	40x Water 2.78Hz	1250	[230.500000000000,1010.50000000000,261.500000000000,36,14,9]	1250x3 double	1250x1 uint16	[253.907147765920,1017.96914587590,265.433410955579]	6957.8	25600	277x2 double	277	1x84 double	1x84 double	3345	2125.82	[166.116245521329,178.163780194278,251.022571717536]	60x1 uint16	177	1.00758	2.14271	3.71164	1x84 double	84	TRUE	TRUE	[]	5568.65	1x84 double	0.261467	263	0.228194	2.99171	3.21991	94.5
011121_S038	4419	40x Water 2.78Hz	4862	[86.5000000000000,796.500000000000,90.5000000000000,36,30,13]	4862x3 double	4862x1 uint16	[106.213461250187,812.891470544146,97.4730924898816]	7024.99	33280	684x2 double	684	1x100 double	1x100 double	3217	2140.69	[296.269898307521,941.375256027885,89.2212080922778]	13x1 uint16	186	1.07325	4.72946	5.64095	1x100 double	100	TRUE	TRUE	[]	5310.88	1x100 double	0.310782	102	2.95071	2.68345	5.63416	36.54
011121_S038	4419	40x Water 2.78Hz	2308	[129.500000000000,500.500000000000,293.500000000000,70,16,10]	2308x3 double	2308x1 uint16	[169.033267805837,509.315439286254,297.460607893543]	7335.04	30720	523x2 double	523	1x52 double	1x52 double	2903	2020.17	[239.913589015152,719.646349862259,283.264096935262]	23x1 uint16	209	1.07156	4.60439	2.42707	1x52 double	52	TRUE	TRUE	[]	5041.68	1x52 double	0.463107	296	0.592412	4.14	4.73241	106.38
011121_S038	4419	40x Water 2.78Hz	2150	[249.500000000000,64.5000000000000,198.500000000000,32,35,10]	2150x3 double	2150x1 uint16	[268.113347664647,77.9552472151651,203.429743990620]	6092.8	28160	522x2 double	522	1x100 double	1x100 double	2833	2264.08	[164.139944959739,666.830496381612,193.661808174498]	13x1 uint16	214	1.1937	2.56104	4.59026	1x100 double	100	TRUE	TRUE	[]	4482.45	1x100 double	0.392779	204	1.46415	1.06427	2.52842	73.26
011121_S038	4419	40x Water 2.78Hz	19499	[217.500000000000,307.500000000000,98.5000000000000,83,87,14]	19499x3 double	19499x1 uint16	[283.262709464800,348.035192497996,105.083778644233]	9410.07	65535	2896x2 double	2896	1x100 double	1x100 double	2794	2440.14	[50.0312042620456,418.756161817224,97.6967390667994]	[2535;2645;2014;2520;2151;2794;2422]	219	1.20713	0.839633	4.87545	1x100 double	100	TRUE	TRUE	[]	6193.15	1x100 double	0.472738	104	0.83975	4.98682	5.82657	37.26
011121_S038	4419	40x Water 2.78Hz	4915	[287.500000000000,191.500000000000,285.500000000000,12,84,15]	4915x3 double	4915x1 uint16	[292.849636910055,238.915178871328,292.193516594903]	10585.2	65535	690x2 double	690	1x57 double	1x57 double	2744	1770.42	[62.0673099552836,267.966250882561,270.129583431396]	12x1 uint16	222	1.23967	6.54844	2.172	1x57 double	57	TRUE	TRUE	[]	8592.7	1x57 double	0.462867	294	1.43292	7.089	8.52192	105.66
011121_S038	4419	40x Water 2.78Hz	8355	[264.500000000000,102.500000000000,197.500000000000,35,85,10]	8355x3 double	8355x1 uint16	[287.877043732554,150.265153529177,203.437757543533]	9220.29	64000	1835x2 double	1835	1x100 double	1x100 double	2689	2450	[199.600233236152,553.561807580175,191.444897959184]	[2278;2309;2548;2385;2269;2689;2672]	224	1.31204	2.02903	3.32333	1x100 double	100	TRUE	TRUE	[]	6637.86	1x100 double	0.440942	203	0.525769	0.978	1.50377	72.9
011121_S038	4419	40x Water 2.78Hz	2415	[190.500000000000,447.500000000000,105.500000000000,33,20,11]	2415x3 double	2415x1 uint16	[202.153495440729,459.574053605969,110.962696877590]	7672.58	30720	400x2 double	400	1x100 double	1x100 double	2652	2412.67	[18.7116606797458,793.345261121857,104]	[2087;2652;2499]	227	1.0233	2.82846	5.86907	1x100 double	100	TRUE	TRUE	[]	5651.2	1x100 double	0.339751	111	1.23816	2.81127	4.04944	39.78
011121_S038	4419	40x Water 2.78Hz	2280	[277.500000000000,722.500000000000,108.500000000000,20,69,10]	2280x3 double	2280x1 uint16	[288.500804117079,744.785944033451,115.586522997748]	6981.61	46080	658x2 double	658	1x100 double	1x100 double	2149	1859.83	[256.014875884936,654.490993816650,106]	[1703;1653;2149;2132;1828;1694]	278	1.18629	1.58977	4.82334	1x100 double	100	TRUE	TRUE	[]	6890.21	1x100 double	0.272163	115	0.871493	1.45714	2.32864	41.22
011121_S038	4419	40x Water 2.78Hz	2642	[270.500000000000,999.500000000000,260.500000000000,28,24,9]	2642x3 double	2642x1 uint16	[284.783783783784,1013.11218481051,265.239619507776]	6417.44	33280	485x2 double	485	1x84 double	1x84 double	2034	1719.88	[103.409041354750,6.35453157932989,248.520168616905]	[1451;2022;1778;1351;1714;1493;1916;2034]	290	1.12454	0.736428	4.54723	1x84 double	84	TRUE	TRUE	[]	5030.27	1x84 double	0.332634	264	0.572143	1.59882	2.17097	94.86
011121_S038	4419	40x Water 2.78Hz	7022	[137.500000000000,397.500000000000,116.500000000000,85,29,11]	7022x3 double	7022x1 uint16	[180.703287536801,410.068792934249,121.684592737978]	7429.91	40960	1113x2 double	1113	1x100 double	1x100 double	2027	2005	[296,560.505486284289,113]	[1983;2027]	291	1.08309	2.49519	6.11772	1x100 double	100	TRUE	TRUE	[]	5297.11	1x100 double	0.37386	122	1.54949	4.68277	6.23226	43.74
011121_S038	4419	40x Water 2.78Hz	2006	[284.500000000000,224.500000000000,37.5000000000000,13,54,13]	2006x3 double	2006x1 uint16	[290.818687872763,249.727793240557,41.5124453280318]	16047.9	64000	509x2 double	509	1x100 double	1x100 double	1500	1486.5	[285,63.5045408678103,37]	[1473;1500]	338	1.05046	4.14035	4.91403	1x100 double	100	TRUE	TRUE	[]	12241.7	1x100 double	0.282498	48	0.707422	4.29344	5.00086	17.1
011121_S038	4419	40x Water 2.78Hz	1133	[282.500000000000,592.500000000000,182.500000000000,18,54,8]	1133x3 double	1133x1 uint16	[293.178727701111,619.809660047122,186.335408953214]	13425.9	64000	396x2 double	396	1x100 double	1x100 double	1081	622	[101.783688979830,72.4071908798597,177.577755042385]	11x1 uint16	365	1.05999	0.989215	5.51651	1x100 double	100	TRUE	TRUE	[]	11306.7	1x100 double	0.611206	213	1.24795	2.74806	3.99601	76.5
011921_S013	4418	40x Water 2.78Hz	7314	[224.500000000000,951.500000000000,126.500000000000,71,50,12]	7314x3 double	7314x1 uint16	[255.813154754011,988.757724439730,132.442779472219]	2639.45	25600	1099x2 double	1099	1x100 double	1x100 double	15138	6291.37	[7.35307564248427,938.266252426047,121.332180263686]	76x1 uint16	28	1.10579	3.61872	5.90205	1x100 double	100	TRUE	TRUE	[]	1467.52	1x100 double	0.766667	135	2.25	1.77891	4.02891	48.42
011921_S013	4418	40x Water 2.78Hz	5877	[152.500000000000,206.500000000000,287.500000000000,56,38,13]	5877x3 double	5877x1 uint16	[185.066923911733,224.688532497287,294.731460267696]	3612.4	25600	1018x2 double	1018	1x54 double	1x54 double	8264	3679.31	[159.665851297315,718.692358016897,272.634311656294]	226x1 uint16	73	1.09593	2.40074	4.24934	1x54 double	54	TRUE	FALSE	[]	2489.59	1x54 double	0.488889	296	1.944	3.78333	5.72733	106.38
011921_S013	4418	40x Water 2.78Hz	699	[237.500000000000,681.500000000000,52.5000000000000,21,20,8]	699x3 double	699x1 uint16	[248.158841940532,693.909233176839,56.1236306729264]	4680.52	20480	203x2 double	203	1x100 double	1x100 double	6001	4537.72	[76.6539624628117,253.061264217241,50.8862498316581]	18x1 uint16	107	1.03093	6.56218	4.89	1x100 double	100	TRUE	TRUE	[]	3165.32	1x100 double	0.549801	61	3.07742	2.36	5.43742	21.78
011921_S013	4418	40x Water 2.78Hz	2154	[174.500000000000,747.500000000000,138.500000000000,47,21,6]	2154x3 double	2154x1 uint16	[201.003110419907,757.459720062208,141.195645412131]	3820.98	25600	557x2 double	557	1x100 double	1x100 double	4145	2925.5	[39.3122787313524,1006.06267548893,127.333349610567]	14x1 uint16	168	1.3097	1.77067	3.69231	1x100 double	100	TRUE	FALSE	[]	2546.21	1x100 double	0.617329	140	0.4704	1.36541	1.83581	50.22
011921_S013	4418	40x Water 2.78Hz	3169	[139.500000000000,270.500000000000,289.500000000000,57,17,11]	3169x3 double	3169x1 uint16	[165.455506438593,278.827215068230,295.415913895829]	4203.12	23040	532x2 double	532	1x54 double	1x54 double	3830	2489.63	[29.8664778132465,953.865547639685,272.835232437689]	19x1 uint16	178	1.09091	2.2642	3.5787	1x54 double	54	TRUE	FALSE	[]	2579.25	1x54 double	0.591418	299	2.81667	2.72069	5.53736	107.46
011921_S013	4418	40x Water 2.78Hz	10898	[106.500000000000,958.500000000000,19.5000000000000,133,63,7]	10898x3 double	10898x1 uint16	[168.106906534326,988.064309346567,22.3315412186380]	3408.01	23040	2942x2 double	2942	1x100 double	1x100 double	3785	2931.68	[87.5802406811112,1013.91557059434,20.6257163128309]	25x1 uint16	181	1.11326	2.62189	4.33754	1x100 double	100	TRUE	FALSE	[]	2370.31	1x100 double	0.48348	22	0.685336	1.02754	1.71288	7.74
011921_S013	4418	40x Water 2.78Hz	39462	[135.500000000000,309.500000000000,129.500000000000,162,97,14]	39462x3 double	39462x1 uint16	[236.720812875068,359.783700342211,136.267953677528]	5232.1	56320	7095x2 double	7095	1x100 double	1x100 double	3155	2721.25	[288.948277446027,774,121.791364262747]	[2271;3011;3155;2448]	221	1.14036	13.5829	5.72425	1x100 double	100	TRUE	TRUE	[]	3367.51	1x100 double	0.798136	169	12.5496	9.50523	22.0548	60.66
011921_S013	4418	40x Water 2.78Hz	426	[151.500000000000,336.500000000000,132.500000000000,19,12,9]	426x3 double	426x1 uint16	[158.607555089192,342.840503672613,136.320041972718]	5726.95	17920	119x2 double	119	1x100 double	1x100 double	2806	2519.29	[226.853416501276,731.440771193649,123.711936489935]	[2526;2554;2355;2413;2798;2806;2183]	237	1.1875	10.828	3.5	1x100 double	100	TRUE	TRUE	[]	3915.29	1x100 double	0.708791	175	7.83659	0.606667	8.44325	62.82
011921_S013	4418	40x Water 2.78Hz	1590	[253.500000000000,953.500000000000,127.500000000000,41,25,10]	1590x3 double	1590x1 uint16	[268.949649458254,963.609305289994,132.635436583811]	2526.19	15360	396x2 double	396	1x100 double	1x100 double	2786	2286.4	[239.381210636809,184.625699790063,119.823827851645]	[2014;2274;2786;2005;2353]	239	1.11966	1.95939	5.40458	1x100 double	100	TRUE	TRUE	[]	1771.31	1x100 double	0.492701	133	1.30596	3.0225	4.32846	47.7
011921_S013	4418	40x Water 2.78Hz	13243	[227.500000000000,732.500000000000,46.5000000000000,73,45,15]	13243x3 double	13243x1 uint16	[270.596576408341,757.297230003112,55.4430750077809]	3105.52	25600	2134x2 double	2134	1x100 double	1x100 double	2726	2257.08	[296.613734539413,913.484807088795,45.5896990954403]	12x1 uint16	241	1.12961	2.27562	5.71429	1x100 double	100	TRUE	FALSE	[]	2130.53	1x100 double	0.469595	57	1.52536	2.02605	3.55141	20.34
011921_S013	4418	40x Water 2.78Hz	1743	[143.500000000000,190.500000000000,288.500000000000,27,17,13]	1743x3 double	1743x1 uint16	[157.102442581116,198.220925993438,296.278891724389]	4028.73	23040	302x2 double	302	1x53 double	1x53 double	2260	2164.5	[25.5046200046200,83,271.521714021714]	[2032;2109;2257;2260]	259	1.16807	2.50304	3.33094	1x53 double	53	TRUE	TRUE	[]	2568.48	1x53 double	0.551155	299	2.05875	2.115	4.17375	107.46
011921_S013	4418	40x Water 2.78Hz	679	[140.500000000000,691.500000000000,187.500000000000,26,10,6]	679x3 double	679x1 uint16	[153.184245660881,696.048064085447,190.528704939920]	2823.92	25600	168x2 double	168	1x100 double	1x100 double	1690	1690	[30,718,177]	1690	299	1.43103	2.72225	3.50602	1x100 double	100	TRUE	TRUE	[]	1935.24	1x100 double	0.645669	190	0.442286	0.885	1.32729	68.22
011921_S013	4418	40x Water 2.78Hz	20109	[0.500000000000000,98.5000000000000,256.500000000000,55,100,14]	20109x3 double	20109x1 uint16	[19.8055364143994,160.020173458477,263.000736604491]	5357.68	43520	3471x2 double	3471	1x86 double	1x86 double	1689	1146.8	[91.5633065922567,34.1432972910127,237.526799209394]	15x1 uint16	300	1.15485	0.418169	3.89377	1x86 double	86	TRUE	FALSE	[]	3536.5	1x86 double	0.477372	261	0.480271	4.07374	4.55401	93.78
011921_S014	4418	40x Water 2.78Hz	1766	[266.500000000000,42.5000000000000,224.500000000000,31,24,9]	1766x3 double	1766x1 uint16	[279.210657193606,55.5033747779751,228.966607460036]	4080.63	23040	394x2 double	394	1x75 double	1x75 double	8488	3640.1	[290.300441985433,867.117920899146,204.350520572410]	958x1 uint16	22	1.03472	3.03589	5.73154	1x75 double	75	TRUE	TRUE	[]	2598.98	1x75 double	0.4875	230	1.79379	2.6892	4.48299	82.62
011921_S014	4418	40x Water 2.78Hz	4058	[126.500000000000,0.500000000000000,220.500000000000,29,31,12]	4058x3 double	4058x1 uint16	[140.720772946860,14.6293995859213,226.915251897861]	4570.53	30720	566x2 double	566	1x75 double	1x75 double	5804	3163.38	[10.7961307250149,856.948752127206,197.346569864544]	60x1 uint16	47	1.01558	0.918967	5.5601	1x75 double	75	TRUE	FALSE	[]	2510.25	1x75 double	0.81982	226	1.28793	3.35893	4.64686	81.18
011921_S014	4418	40x Water 2.78Hz	64482	[116.500000000000,897.500000000000,191.500000000000,180,109,36]	64482x3 double	64482x1 uint16	[202.465825774387,947.632083673973,217.508155876513]	3059.4	25600	11796x2 double	11796	1x75 double	1x75 double	5573	4121.38	[55.4909042993794,248.664045643647,169.112879098783]	418x1 uint16	48	1.08366	4.86126	6.24048	1x75 double	75	TRUE	FALSE	[]	1877.68	1x75 double	0.597896	221	2.73355	3.97791	6.71146	79.38
011921_S014	4418	40x Water 2.78Hz	418	[42.5000000000000,242.500000000000,165.500000000000,24,12,7]	418x3 double	418x1 uint16	[56.3272727272727,248.888484848485,168.870303030303]	5052.63	23040	132x2 double	132	1x75 double	1x75 double	5337	2625.13	[154.061445632939,675.911745438598,152.117950047455]	767x1 uint16	52	1.09184	10.5298	0.542056	1x75 double	75	TRUE	TRUE	[]	3490.91	1x75 double	0.844444	213	3.06857	1.84114	4.90971	76.5
011921_S014	4418	40x Water 2.78Hz	780	[90.5000000000000,2.50000000000000,223.500000000000,21,14,8]	780x3 double	780x1 uint16	[103.303597122302,8.34820143884892,228.010791366907]	4562.05	20480	181x2 double	181	1x75 double	1x75 double	5069	2914.98	[19.5787150310044,922.160077414010,197.601505560086]	53x1 uint16	59	1.08046	5.25811	5.07447	1x75 double	75	TRUE	TRUE	[]	2885.3	1x75 double	0.504902	230	1.74808	0.979024	2.7271	82.62
011921_S014	4418	40x Water 2.78Hz	22336	[13.5000000000000,201.500000000000,203.500000000000,117,72,11]	22336x3 double	22336x1 uint16	[69.7905728217505,241.105280007881,208.525020932867]	4653.98	28160	4076x2 double	4076	1x75 double	1x75 double	4826	2650.86	[26.7876967018754,975.624453392049,183.415564468943]	98x1 uint16	64	1.01313	2.80281	6.27882	1x75 double	75	TRUE	FALSE	[]	2983.95	1x75 double	0.529152	211	2.10103	2.88956	4.99059	75.78
011921_S014	4418	40x Water 2.78Hz	574	[163.500000000000,798.500000000000,28.5000000000000,22,10,6]	574x3 double	574x1 uint16	[175.068249258160,804.038575667656,31.6780415430267]	3005.99	15360	157x2 double	157	1x75 double	1x75 double	4585	2691.85	[14.2728857090442,581.247167950835,29.3704939460649]	162x1 uint16	72	1.1129	4.30802	3.33333	1x75 double	75	TRUE	TRUE	[]	2021.91	1x75 double	0.637097	31	0.568929	1.19571	1.76464	10.98
011921_S014	4418	40x Water 2.78Hz	475	[279.500000000000,582.500000000000,124.500000000000,13,10,8]	475x3 double	475x1 uint16	[286.962323390895,588.037676609105,128.582417582418]	3433.09	23040	94x2 double	94	1x75 double	1x75 double	3813	1693.67	[7.56963852260054,777.914426294037,116.104520107590]	45x1 uint16	97	1.23077	2.69159	4.47917	1x75 double	75	TRUE	TRUE	[]	2097.02	1x75 double	0.727273	128	0.864	1.26	2.124	45.9
011921_S014	4418	40x Water 2.78Hz	1852	[280.500000000000,483.500000000000,185.500000000000,20,32,12]	1852x3 double	1852x1 uint16	[292.671846765450,495.737621973256,191.883267076256]	3824.79	20480	353x2 double	353	1x75 double	1x75 double	3572	2197.54	[5.71822323128037,516.077320167734,163.202034535232]	93x1 uint16	101	1.09848	3.32907	5.4	1x75 double	75	TRUE	TRUE	[]	2618.02	1x75 double	0.407202	193	1.62205	1.422	3.04405	69.3
011921_S014	4418	40x Water 2.78Hz	4460	[119.500000000000,206.500000000000,202.500000000000,69,34,10]	4460x3 double	4460x1 uint16	[152.833180927498,216.085434356630,208.238798171130]	4393.9	30720	905x2 double	905	1x75 double	1x75 double	3554	2164.25	[8.19138785831122,778.865501328649,185.571769472069]	237x1 uint16	102	1.04626	0.982378	5.47789	1x75 double	75	TRUE	FALSE	[]	2820.24	1x75 double	0.517553	208	0.933158	2.97634	3.9095	74.7
011921_S014	4418	40x Water 2.78Hz	14008	[23.5000000000000,935.500000000000,35.5000000000000,78,89,18]	14008x3 double	14008x1 uint16	[61.4683942746900,988.050191974277,45.5208042896511]	2543.1	25600	3089x2 double	3089	1x75 double	1x75 double	2796	2037.22	[260.999746897578,1015.12777070455,36.5273427313586]	64x1 uint16	125	1.13536	0.640605	4.14238	1x75 double	75	TRUE	FALSE	[]	1643.71	1x75 double	0.598341	44	0.512311	1.6725	2.18481	15.66
011921_S014	4418	40x Water 2.78Hz	905	[123.500000000000,255.500000000000,204.500000000000,16,20,7]	905x3 double	905x1 uint16	[131.970113568440,263.598924088464,208.172743574417]	4732.46	23040	222x2 double	222	1x75 double	1x75 double	2658	1882.11	[279.586083487048,869.647616087898,182.300665650814]	53x1 uint16	130	1.0354	6.805	5.04274	1x75 double	75	TRUE	TRUE	[]	3032.79	1x75 double	0.486692	213	2.76	1.32923	4.08923	76.5
011921_S014	4418	40x Water 2.78Hz	4772	[0.500000000000000,60.5000000000000,143.500000000000,40,60,8]	4772x3 double	4772x1 uint16	[19.9931883365201,77.8764340344168,147.133843212237]	4489.12	35840	1068x2 double	1068	1x75 double	1x75 double	2321	1298.1	[293.967799090979,5.43407030788588,132.158154225406]	30x1 uint16	162	1.05502	1.80104	4.58957	1x75 double	75	TRUE	TRUE	[]	3130.49	1x75 double	0.394334	147	0.920455	1.75047	2.67092	52.74
011921_S014	4418	40x Water 2.78Hz	1811	[72.5000000000000,781.500000000000,292.500000000000,48,31,10]	1811x3 double	1811x1 uint16	[96.9329430548164,795.876530069186,297.536987759447]	2656.12	17920	407x2 double	407	1x51 double	1x51 double	2252	1551.06	[7.44734120428201,483.740513895045,265.062645229748]	48x1 uint16	171	1.14423	4.31194	2.97479	1x51 double	51	TRUE	TRUE	[]	1861.82	1x51 double	0.554054	302	2.94	2.77714	5.71714	108.54
011921_S014	4418	40x Water 2.78Hz	500	[92.5000000000000,18.5000000000000,223.500000000000,11,10,8]	500x3 double	500x1 uint16	[98.0771456123433,23.6759884281582,227.687560270010]	5309.44	28160	97x2 double	97	1x75 double	1x75 double	2224	1936	[14.7371139625924,998.930350152240,196.364968464550]	19x1 uint16	176	1.14545	6.98839	4.84127	1x75 double	75	TRUE	TRUE	[]	2982.27	1x75 double	0.716814	231	2.7	0.961579	3.66158	82.98
011921_S014	4418	40x Water 2.78Hz	5571	[167.500000000000,743.500000000000,26.5000000000000,51,65,8]	5571x3 double	5571x1 uint16	[198.942166410388,774.249103024090,31.4053476849479]	5379.17	40960	1560x2 double	1560	1x75 double	1x75 double	2204	1662.39	[34.1930956120710,928.997426728603,27.4050730207533]	18x1 uint16	181	1.2847	3.28722	3.55309	1x75 double	75	TRUE	TRUE	[]	3579.08	1x75 double	0.529115	31	0.556311	0.874068	1.43038	10.98
011921_S014	4418	40x Water 2.78Hz	505	[86.5000000000000,266.500000000000,206.500000000000,22,16,5]	505x3 double	505x1 uint16	[100.515299877601,276.690330477356,209.086903304774]	4141.62	17920	159x2 double	159	1x75 double	1x75 double	1952	1744.43	[294.421587093604,950.590123658996,183.422487920727]	[1659;1807;1701;1885;1645;1952;1562]	205	1.06818	3.19686	4.61702	1x75 double	75	TRUE	TRUE	[]	2511.7	1x75 double	0.589744	211	1.13143	0.531429	1.66286	75.78
011921_S014	4418	40x Water 2.78Hz	832	[70.5000000000000,813.500000000000,294.500000000000,30,29,7]	832x3 double	832x1 uint16	[84.6282973621103,824.621103117506,298.514788169464]	3849.23	17920	237x2 double	237	1x50 double	1x50 double	1866	1424.07	[275.591756003932,890.691470436777,265.443424933290]	30x1 uint16	211	1.16279	3.12973	3.68	1x50 double	50	TRUE	TRUE	[]	2570.8	1x50 double	0.504202	299	0.6	2.28462	2.88462	107.46
011921_S014	4418	40x Water 2.78Hz	2405	[223.500000000000,1.50000000000000,225.500000000000,44,25,10]	2405x3 double	2405x1 uint16	[248.941502166586,13.4581126624940,229.881078478575]	4421.72	25600	495x2 double	495	1x75 double	1x75 double	1759	1727	[284.509264620730,367,197.490735379270]	[1759;1695]	229	1.0303	2.23389	5.55392	1x75 double	75	TRUE	FALSE	[]	2978.91	1x75 double	0.503472	230	1.88333	4.76	6.64333	82.62
011921_S014	4418	40x Water 2.78Hz	906	[76.5000000000000,910.500000000000,215.500000000000,32,15,8]	906x3 double	906x1 uint16	[94.7247386759582,917.466027874565,219.398954703833]	3243.8	17920	253x2 double	253	1x75 double	1x75 double	1739	1568.78	[68.6622990296763,621.435795736242,192.442878390821]	[1576;1557;1739;1525;1469;1532;1572;1650;1499]	232	1.09195	3.41225	5.58947	1x75 double	75	TRUE	FALSE	[]	2023.72	1x75 double	0.665	221	1.386	4.98536	6.37136	79.38
011921_S014	4418	40x Water 2.78Hz	1666	[270.500000000000,1.50000000000000,224.500000000000,25,16,9]	1666x3 double	1666x1 uint16	[278.400753768844,9.03685092127303,228.730737018425]	3669.44	20480	295x2 double	295	1x75 double	1x75 double	1689	1669	[295.505991611744,31,196]	[1649;1689]	239	1.15534	3.00781	5.18487	1x75 double	75	TRUE	TRUE	[]	2238.92	1x75 double	0.523256	230	1.90038	1.37429	3.27467	82.62
011921_S014	4418	40x Water 2.78Hz	561	[97.5000000000000,176.500000000000,205.500000000000,22,14,7]	561x3 double	561x1 uint16	[108.923636363636,183.441818181818,209.165454545455]	5019.61	23040	156x2 double	156	1x75 double	1x75 double	1513	1513	[34,570,182]	1513	256	1.19512	2.51267	4.81633	1x75 double	75	TRUE	TRUE	[]	2937.44	1x75 double	0.73743	211	1.296	1.7775	3.0735	75.78
011921_S014	4418	40x Water 2.78Hz	1165	[242.500000000000,468.500000000000,183.500000000000,36,19,13]	1165x3 double	1165x1 uint16	[260.291481810115,478.649511978705,192.330523513753]	4953	25600	329x2 double	329	1x75 double	1x75 double	1512	1358.71	[28.5665019451162,625.321417306277,160.735779623594]	[1190;1323;1183;1512;1428;1386;1489]	257	1.01389	3.23372	5.73288	1x75 double	75	TRUE	TRUE	[]	3563.77	1x75 double	0.342795	193	1.23245	1.068	2.30045	69.3
011921_S014	4418	40x Water 2.78Hz	52917	[91.5000000000000,746.500000000000,289.500000000000,167,138,15]	52917x3 double	52917x1 uint16	[167.372016163748,827.978503881244,297.622998625248]	3483.82	30720	9073x2 double	9073	1x51 double	1x51 double	1362	1042.77	[293.453378577752,949.019105930953,260.411035703747]	13x1 uint16	278	1.00356	2.01792	4.2264	1x51 double	51	TRUE	FALSE	[]	2330.89	1x51 double	0.54376	302	2.94193	2.69333	5.63526	108.54
011921_S014	4418	40x Water 2.78Hz	7016	[259.500000000000,597.500000000000,117.500000000000,41,30,17]	7016x3 double	7016x1 uint16	[285.789876789877,612.170385170385,128.478299478299]	3287.21	28160	910x2 double	910	1x75 double	1x75 double	1172	1115	[6,660.525560538117,109]	[1058;1172]	296	1.12525	0.625941	4.48654	1x75 double	75	TRUE	FALSE	[]	2143.65	1x75 double	0.73622	128	0.75589	1.67625	2.43214	45.9
011921_S014	4418	40x Water 2.78Hz	3531	[269.500000000000,506.500000000000,186.500000000000,31,27,11]	3531x3 double	3531x1 uint16	[285.151322138583,524.342983979927,191.741169658367]	3756.26	17920	528x2 double	528	1x75 double	1x75 double	1120	1120	[285,403,161]	1120	303	1.125	5.55186	5.49603	1x75 double	75	TRUE	TRUE	[]	2521.21	1x75 double	0.551923	196	2.48966	5.14636	7.63603	70.38
011921_S014	4418	40x Water 2.78Hz	4172	[140.500000000000,894.500000000000,146.500000000000,51,32,9]	4172x3 double	4172x1 uint16	[166.440360610264,913.200762829404,150.816747572816]	3539.33	23040	1031x2 double	1031	1x75 double	1x75 double	990	897	[88.4006688963211,672.418506131550,134.162095875139]	[990;971;891;906;727]	314	1.05594	2.84307	3.80574	1x75 double	75	TRUE	TRUE	[]	2311.7	1x75 double	0.622986	150	0.519623	1.62353	2.14315	53.82
011921_S014	4418	40x Water 2.78Hz	47290	[172.500000000000,72.5000000000000,278.500000000000,128,84,12]	47290x3 double	47290x1 uint16	[250.741525263357,118.629458146723,284.891604112786]	4290.94	35840	6785x2 double	6785	1x64 double	1x64 double	729	270.593	[288.852313167260,613.094442923625,250.041883383520]	54x1 uint16	334	1.01237	1.59764	6.05274	1x64 double	64	TRUE	FALSE	[]	2761.1	1x64 double	0.578983	285	1.35279	2.00143	3.35422	102.42

## Sheet: Averaged per recording S42A
Recording	Mice	Gender	Age	Imaging	numEvents	frequency (Hz)	amp (df/F0)	Area	Area2D (pixel)	Half Rise Time (s)	Half Decay Time (s)	FWHM	AmpxArea	AmpxArea2D	Total Area2D (pixel)	Total Area (pixel)	Mitochondria area (pixel)	2D area ratio
021721_S002	4463	Male	5 month	40x water	11	0.0920348	0.806124	3042	560.545	2.07022	4.93565	7.10758	2452.23	451.869	6166	33462	106156	0.0580843
021721_S003	4463	Male	5 month	40x water	12	0.100402	0.569837	1464.83	280.167	1.94794	1.84576	3.49753	834.716	159.649	3362	17578	94097	0.0357291
021721_S020	4463	Male	5 month	40x water	13	0.108768	0.585585	8975.77	1640.23	1.8202	3.93219	5.75239	5256.08	960.495	21323	116685	126819	0.168137
021721_S021	4463	Male	5 month	40x water	23	0.192436	0.584622	4358.65	715.478	1.44287	2.51423	3.9571	2548.16	418.284	16456	100249	120125	0.136991
021721_S026	4463	Male	5 month	40x water	9	0.0753012	0.402241	14359.6	2206.56	2.2188	4.75972	6.97852	5776	887.567	19859	129236	125205	0.158612
021821_S010	4465	Male	5 month	40x water	10	0.083668	0.682673	19482.7	2638.4	2.51207	3.58662	6.13833	13300.3	1801.16	26384	194827	120895	0.218239
021821_S004	4465	Male	5 month	40x water	14	0.117135	0.621749	6461.86	894.571	1.75002	2.78546	4.53548	4017.65	556.199	12524	90466	144211	0.086845
030321_S005	4466	Male	6 month	40x water	19	0.158969	0.561702	12985	1556.84	2.1961	6.7637	8.64057	7293.7	874.481	29580	246715	141203	0.209486
030321_S012	4466	Male	6 month	40x water	8	0.0669344	0.702528	25642.5	2284.5	1.61664	3.78303	5.39967	18014.6	1604.93	18276	205140	149896	0.121925
030321_S043	4466	Male	6 month	40x water	19	0.158969	0.443919	10413.7	1256.42	3.48465	3.58167	7.06632	4622.84	557.75	23872	197860	145240	0.164362
030321_S034	4466	Male	6 month	40x water	15	0.125502	0.517713	3208.27	398.4	0.833888	2.72907	3.58695	1660.96	206.257	5976	48124	122844	0.0486471
032421_S005	4430	Female	6 month	40x water	16	0.133869	0.409447	8637.81	1128.19	2.13225	4.97864	7.0044	3536.73	461.933	18051	138205	145442	0.124111
032421_S007	4430	Female	6 month	40x water	10	0.083668	0.506083	29789.8	3698.5	2.15534	4.78973	7.05688	15076.1	1871.75	36985	297898	140484	0.263268
032421_S019	4430	Female	6 month	40x water	37	0.309572	0.601685	4917.08	865.838	0.998377	3.8595	4.85788	2958.54	520.962	32036	181932	147864	0.216659
032421_S029	4430	Female	6 month	40x water	32	0.267738	0.474472	9916.62	1472.31	1.06312	3.00871	4.08308	4705.16	698.57	47114	317332	138427	0.340353
032421_S022	4430	Female	6 month	40x water	12	0.100402	0.45281	10840.8	1163.25	1.18209	2.65753	3.86961	4908.8	526.731	13959	130089	141479	0.0986648
032421_S030	4430	Female	6 month	40x water	22	0.18407	0.575055	12594.5	1543	1.29392	4.40564	5.5381	7242.5	887.309	33946	277078	138427	0.245227
032421_S032	4430	Female	6 month	40x water	30	0.251004	0.72857	7455.93	1007.53	1.46204	3.7662	5.22824	5432.17	734.059	30226	223678	130837	0.23102

## Sheet: Individual mitoflash S42A
Recording	Mice	Imaging	Area								Area 2D (pixel)							ID					Length						amp (df/F0)	PeakFrame	Half Rise Time	Half Decay Time	FWHM	Peak Time
021721_S002	4463	40x water	1175	[207.500000000000,910.500000000000,311.500000000000,23,28,10]	1175x3 double	1175x1 uint16	[218.823546571217,923.769544052819,316.784389573802]	4533.78	25646	265x2 double	265	1x32 double	1x32 double	7137	1737.78	[10.2059425439180,308.156133848028,319.432540812112]	1686x1 uint16	10	1.30788	12.4368	0.89211	1x32 double	32	TRUE	TRUE	[]	3069.1	1x32 double	0.536878	316	0.676684	4.53833	5.21501	113.58
021721_S002	4463	40x water	7270	[69.5000000000000,947.500000000000,247.500000000000,65,36,15]	7270x3 double	7270x1 uint16	[112.403701897712,966.041528009650,255.006879669102]	3935.7	28176	869x2 double	869	1x94 double	1x94 double	5905	2088.24	[13.1376513267141,737.762524718706,250.281967230058]	278x1 uint16	19	1.06198	3.81617	5.46352	1x94 double	94	TRUE	TRUE	[]	2141.29	1x94 double	0.811227	259	3.21474	11.4863	14.701	93.06
021721_S002	4463	40x water	7945	[193.500000000000,833.500000000000,310.500000000000,39,77,13]	7945x3 double	7945x1 uint16	[213.740606438926,869.064582637867,317.168095667380]	4696.05	25588	1465x2 double	1465	1x32 double	1x32 double	5209	2104.46	[290.653497649401,596.891271511781,312.660097943001]	291x1 uint16	26	1.28786	57.9353	-1.89935	1x32 double	32	TRUE	TRUE	[]	3005.36	1x32 double	0.580336	320	2.53624	[]	[]	115.02
021721_S002	4463	40x water	1968	[165.500000000000,893.500000000000,312.500000000000,36,27,10]	1968x3 double	1968x1 uint16	[184.460695553899,906.137301036076,317.691615027071]	4992.45	28161	398x2 double	398	1x31 double	1x31 double	2272	1179.25	[266.584971389719,681.658128146558,313.992574314155]	111x1 uint16	45	1.09093	27.4126	0.474197	1x31 double	31	TRUE	TRUE	[]	3286.17	1x31 double	0.531534	317	0.688844	[]	[]	113.94
021721_S002	4463	40x water	703	[185.500000000000,629.500000000000,39.5000000000000,10,10,13]	703x3 double	703x1 uint16	[190.816091376996,634.685203024763,46.8315816590748]	5383.73	20522	86x2 double	86	1x100 double	1x100 double	1951	991.314	[37.9187594571452,196.648329091058,41.4283368327214]	86x1 uint16	49	1.12248	6.31179	4.55339	1x100 double	100	TRUE	TRUE	[]	2474	1x100 double	2.08055	64	3.14528	4.62429	7.76957	22.86
021721_S002	4463	40x water	609	[187.500000000000,720.500000000000,36.5000000000000,12,14,7]	609x3 double	609x1 uint16	[192.364198530059,728.428995011036,39.7442406023342]	4757.63	20475	128x2 double	128	1x100 double	1x100 double	1792	824.633	[26.0702029184688,470.774435102470,39.1599195602086]	120x1 uint16	53	1.06415	3.67289	4.75805	1x100 double	100	TRUE	TRUE	[]	2866.41	1x100 double	0.758665	41	1.51587	1.33632	2.85219	14.58
021721_S002	4463	40x water	3365	[190.500000000000,645.500000000000,36.5000000000000,26,22,17]	3365x3 double	3365x1 uint16	[204.013688280431,654.985206538316,44.9716374699678]	4392.39	25556	382x2 double	382	1x100 double	1x100 double	633	465.333	[197.020773638968,990.681590257880,37.7141833810888]	12x1 uint16	91	1.06633	7.10815	5.94536	1x100 double	100	TRUE	TRUE	[]	2651.7	1x100 double	1.40997	63	5.0351	13.8234	18.8585	22.5
021721_S002	4463	40x water	496	[198.500000000000,649.500000000000,56.5000000000000,17,16,8]	496x3 double	496x1 uint16	[207.330902734433,656.083687478392,60.5858857379882]	5604.23	28154	129x2 double	129	1x100 double	1x100 double	402	402	[18,592,57]	402	105	1.04411	6.69694	5.57075	1x100 double	100	TRUE	TRUE	[]	4253.12	1x100 double	0.414646	62	1.57256	1.39867	2.97123	22.14
021721_S002	4463	40x water	476	[180.500000000000,629.500000000000,56.5000000000000,14,12,7]	476x3 double	476x1 uint16	[188.675480185335,635.662622344690,59.7929708351281]	7135.4	28169	111x2 double	111	1x100 double	1x100 double	385	383.5	[16,592.501955671447,57]	[382;385]	106	1.18777	5.79894	4.91837	1x100 double	100	TRUE	TRUE	[]	4409.23	1x100 double	0.637782	64	2.36416	2.88651	5.25067	22.86
021721_S002	4463	40x water	363	[217.500000000000,677.500000000000,55.5000000000000,10,15,7]	363x3 double	363x1 uint16	[222.406027333654,684.524407161968,59.8087235986922]	4841.31	20533	93x2 double	93	1x100 double	1x100 double	338	338	[44,88,56]	338	109	1.05068	4.05875	5.35802	1x100 double	100	TRUE	TRUE	[]	3255.1	1x100 double	0.565314	61	1.00058	1.34642	2.347	21.78
021721_S002	4463	40x water	9092	[168.500000000000,929.500000000000,226.500000000000,53,94,9]	9092x3 double	9092x1 uint16	[201.239270905468,974.057000997206,231.181202170360]	4576.8	30664	2240x2 double	2240	1x100 double	1x100 double	290	290	[294,157,226]	290	112	1.19457	0.587738	5.09707	1x100 double	100	TRUE	TRUE	[]	3066.34	1x100 double	0.540456	231	1.02238	2.98053	4.00292	82.98
021721_S003	4463	40x water	7064	[123.500000000000,372.500000000000,102.500000000000,47,45,14]	7064x3 double	7064x1 uint16	[146.789324769611,394.697113095878,109.087500524234]	4708.78	33260	1117x2 double	1117	1x100 double	1x100 double	12476	5088.39	[48.3822547758775,237.254342325499,105.546888351394]	296x1 uint16	8	1.00858	4.44773	4.5018	1x100 double	100	TRUE	TRUE	[]	3091.97	1x100 double	0.64223	120	5.20589	[]	[]	43.02
021721_S003	4463	40x water	2983	[69.5000000000000,567.500000000000,69.5000000000000,47,28,9]	2983x3 double	2983x1 uint16	[93.7479192115437,583.426787212517,72.8349197606917]	4977.69	28201	718x2 double	718	1x100 double	1x100 double	8616	2655.9	[94.4272011996130,583.455112649896,72.9036102620935]	2983x1 uint16	17	1.04535	1.47441	4.75543	1x100 double	100	TRUE	TRUE	[]	3391.25	1x100 double	0.406151	72	0.809002	2.0702	2.8792	25.74
021721_S003	4463	40x water	1262	[155.500000000000,500.500000000000,312.500000000000,12,16,12]	1262x3 double	1262x1 uint16	[162.062922285260,508.122188063931,319.227672839651]	5004	30759	154x2 double	154	1x30 double	1x30 double	7002	2629.82	[27.2972506947401,67.5862338631374,316.516384386165]	159x1 uint16	29	1.11922	18.3454	1.62257	1x30 double	30	TRUE	TRUE	[]	2781.63	1x30 double	0.758835	321	1.95113	4.07891	6.03003	115.38
021721_S003	4463	40x water	285	[162.500000000000,139.500000000000,163.500000000000,9,10,9]	285x3 double	285x1 uint16	[167.622160555798,145.105070025115,168.244442517369]	5260.02	23039	59x2 double	59	1x100 double	1x100 double	6592	3034.08	[52.8260858464531,247.265210438238,166.706147772138]	142x1 uint16	33	1.48135	3.48705	4.27082	1x100 double	100	TRUE	TRUE	[]	3524.34	1x100 double	0.664065	171	1.16653	0.276772	1.4433	61.38
021721_S003	4463	40x water	535	[161.500000000000,954.500000000000,49.5000000000000,12,15,6]	535x3 double	535x1 uint16	[167.212207954092,962.668649780738,52.1355272688479]	8322.29	35872	119x2 double	119	1x100 double	1x100 double	6270	2828.47	[167.484927264809,962.196017919297,52.1098782801546]	535x1 uint16	37	1.02393	2.05062	4.1909	1x100 double	100	TRUE	TRUE	[]	4931.61	1x100 double	0.697739	51	0.57575	2.40797	2.98372	18.18
021721_S003	4463	40x water	401	[89.5000000000000,790.500000000000,66.5000000000000,11,8,10]	401x3 double	401x1 uint16	[94.3947947151605,794.194018095974,71.6046113441227]	6877.43	25604	68x2 double	68	1x100 double	1x100 double	4301	1922.56	[95.1299742523786,794.467191563601,71.2332254570689]	401x1 uint16	53	1.00041	4.83651	5.14574	1x100 double	100	TRUE	TRUE	[]	3965.34	1x100 double	0.861179	74	0.356052	1.72717	2.08323	26.46
021721_S003	4463	40x water	874	[172.500000000000,178.500000000000,162.500000000000,17,19,9]	874x3 double	874x1 uint16	[183.175869683764,189.421545546168,166.617843486247]	5501.42	28163	203x2 double	203	1x100 double	1x100 double	3083	1861.21	[49.5953126447429,434.820176007411,164.258360352015]	29x1 uint16	69	1.02688	6.68136	5.72538	1x100 double	100	TRUE	TRUE	[]	3953.1	1x100 double	0.458823	173	3.58948	0.676156	4.26563	62.1
021721_S003	4463	40x water	1524	[144.500000000000,185.500000000000,161.500000000000,22,31,11]	1524x3 double	1524x1 uint16	[157.857349096706,204.865891753520,166.996317317606]	4973.27	23036	355x2 double	355	1x100 double	1x100 double	2722	1716.07	[39.1259937565036,514.586514047867,164.018772112383]	28x1 uint16	76	1.09198	4.23824	5.76996	1x100 double	100	TRUE	TRUE	[]	3258.26	1x100 double	0.558807	171	2.67008	2.44753	5.11761	61.38
021721_S003	4463	40x water	525	[224.500000000000,743.500000000000,275.500000000000,13,14,6]	525x3 double	525x1 uint16	[230.725793079711,750.184020494142,278.771619843896]	7149.82	35879	126x2 double	126	1x70 double	1x70 double	1553	964.5	[48.9725246241576,1017.74639709694,277.181233799896]	[869;590;1526;916;1553;846;728;881;684;1052]	94	1.17766	3.8177	5.11387	1x70 double	70	TRUE	TRUE	[]	5270.49	1x70 double	0.36171	280	0.920863	1.18754	2.10841	100.62
021721_S003	4463	40x water	596	[219.500000000000,725.500000000000,275.500000000000,11,16,9]	596x3 double	596x1 uint16	[224.853423018371,733.973484215670,280.290039019674]	6427.66	28169	115x2 double	115	1x69 double	1x69 double	985	881.5	[48.5587067498582,419,276]	[778;985]	105	1.2006	5.36728	4.50996	1x69 double	69	TRUE	TRUE	[]	4079.9	1x69 double	0.648685	284	2.67933	2.34702	5.02635	102.06
021721_S003	4463	40x water	741	[225.500000000000,701.500000000000,275.500000000000,14,22,7]	741x3 double	741x1 uint16	[233.571091443030,711.337676143058,279.282341324799]	5978.21	25599	176x2 double	176	1x70 double	1x70 double	948	797.4	[57.4396789566090,265.166039628794,276.425382493103]	[824;662;805;748;948]	106	1.02342	2.96792	5.95093	1x70 double	70	TRUE	TRUE	[]	4470.86	1x70 double	0.347613	280	1.47714	2.58588	4.06302	100.62
021721_S003	4463	40x water	788	[126.500000000000,738.500000000000,236.500000000000,20,13,9]	788x3 double	788x1 uint16	[138.798311758169,745.211369098448,241.416314590317]	5445.1	25618	152x2 double	152	1x100 double	1x100 double	535	535	[20,301,237]	535	117	1.06502	6.81039	4.49479	1x100 double	100	TRUE	TRUE	[]	4047.17	1x100 double	0.432202	246	1.9741	0.498255	2.47235	88.38
021721_S020	4463	40x water	90018	[29.5000000000000,0.500000000000000,19.5000000000000,218,148,16]	90018x3 double	90018x1 uint16	[137.562456486680,61.8665192730572,23.5021036910950]	3721.23	33312	14950x2 double	14950	1x100 double	1x100 double	29156	7571.04	[133.963731721525,60.0206870080753,22.8220824470272]	90018x1 uint16	3	1.02219	2.69688	6.19012	1x100 double	100	TRUE	TRUE	[]	2242.79	1x100 double	0.65929	30	4.62033	19.3252	23.9455	10.62
021721_S020	4463	40x water	2549	[228.500000000000,461.500000000000,73.5000000000000,28,42,9]	2549x3 double	2549x1 uint16	[243.948220552402,487.501787822636,78.1458080744707]	3360.97	20523	544x2 double	544	1x100 double	1x100 double	11919	4353.38	[244.926973300446,488.336794728776,78.4208699516986]	2549x1 uint16	8	1.01138	5.88947	5.76699	1x100 double	100	TRUE	TRUE	[]	2347.33	1x100 double	0.458023	84	3.25723	4.57419	7.83142	30.06
021721_S020	4463	40x water	8720	[3.50000000000000,811.500000000000,78.5000000000000,49,72,11]	8720x3 double	8720x1 uint16	[26.6394697813565,844.953505262415,83.6901584181512]	4159.99	30718	1924x2 double	1924	1x100 double	1x100 double	11842	6248.09	[23.3132904568815,843.633586263139,83.6648846425856]	8720x1 uint16	9	1.00492	5.80045	5.93332	1x100 double	100	TRUE	TRUE	[]	2853.42	1x100 double	0.456906	88	2.92038	3.21186	6.13223	31.5
021721_S020	4463	40x water	1987	[13.5000000000000,373.500000000000,77.5000000000000,26,38,7]	1987x3 double	1987x1 uint16	[26.3421917958048,388.867185014691,81.3823024098550]	3671.87	20500	536x2 double	536	1x100 double	1x100 double	11820	6033.41	[26.2891444249450,390.013538928862,81.4809728876923]	1987x1 uint16	10	1.11589	1.38096	4.28412	1x100 double	100	TRUE	TRUE	[]	2507.31	1x100 double	0.526094	81	0.632583	1.5198	2.15239	28.98
021721_S020	4463	40x water	2188	[206.500000000000,29.5000000000000,233.500000000000,34,17,11]	2188x3 double	2188x1 uint16	[224.348072638094,38.9530067710833,239.017132349177]	3338.88	23023	341x2 double	341	1x100 double	1x100 double	11368	3958.82	[225.582250190403,37.7602947018480,238.847166795949]	2188x1 uint16	12	1.06851	4.97635	5.23537	1x100 double	100	TRUE	TRUE	[]	1908.9	1x100 double	0.72602	243	3.29225	1.54583	4.83808	87.3
021721_S020	4463	40x water	2782	[260.500000000000,632.500000000000,159.500000000000,40,44,7]	2782x3 double	2782x1 uint16	[283.978356430772,653.687460079330,163.656296983169]	3551.59	25628	807x2 double	807	1x100 double	1x100 double	10651	2855	[285.068965308850,652.291031075207,163.660891481154]	2782x1 uint16	14	1.14204	2.33463	3.48831	1x100 double	100	TRUE	TRUE	[]	2482.97	1x100 double	0.516396	163	0.451649	0.922639	1.37429	58.5
021721_S020	4463	40x water	1398	[235.500000000000,287.500000000000,177.500000000000,32,19,9]	1398x3 double	1398x1 uint16	[253.165308519122,298.102649918895,181.864387482749]	3351.87	17925	357x2 double	357	1x100 double	1x100 double	8306	4124.63	[253.224864500020,297.805866460224,181.825364271361]	1398x1 uint16	24	1.15437	3.47742	3.87583	1x100 double	100	TRUE	TRUE	[]	2431.34	1x100 double	0.283601	180	0.310361	1.60925	1.91962	64.62
021721_S020	4463	40x water	564	[107.500000000000,138.500000000000,25.5000000000000,13,15,10]	564x3 double	564x1 uint16	[114.291159604569,144.741960549795,29.2726978026019]	3664.55	25606	126x2 double	126	1x100 double	1x100 double	7843	4655.79	[114.170903172171,146.010596880954,29.3965768258636]	564x1 uint16	30	1.05258	7.06209	3.61664	1x100 double	100	TRUE	TRUE	[]	2627.52	1x100 double	0.532336	55	1.75811	3.28342	5.04152	19.62
021721_S020	4463	40x water	743	[79.5000000000000,119.500000000000,19.5000000000000,26,22,6]	743x3 double	743x1 uint16	[93.8484675279136,128.469491094338,21.8142172180463]	3423.73	20456	223x2 double	223	1x100 double	1x100 double	7287	4309.89	[92.6953889892351,127.540909386156,21.7485794354466]	743x1 uint16	34	1.22411	6.31631	3.83577	1x100 double	100	TRUE	TRUE	[]	2017.73	1x100 double	0.807051	32	2.34045	11.8498	14.1902	11.34
021721_S020	4463	40x water	1240	[239.500000000000,258.500000000000,178.500000000000,32,21,7]	1240x3 double	1240x1 uint16	[258.537620081434,267.963142419133,181.878980976001]	3413.01	20478	312x2 double	312	1x100 double	1x100 double	7271	3928.71	[259.969744014182,269.143896930740,181.930116565447]	1240x1 uint16	35	1.20435	4.98879	4.79688	1x100 double	100	TRUE	TRUE	[]	2248.23	1x100 double	0.485147	182	1.12157	1.38144	2.50301	65.34
021721_S020	4463	40x water	507	[213.500000000000,114.500000000000,19.5000000000000,13,15,12]	507x3 double	507x1 uint16	[220.166797639117,121.678307429798,25.5790982303617]	3852.74	15368	120x2 double	120	1x100 double	1x100 double	6786	4176.46	[220.418415811752,121.758753281639,25.5827520953141]	507x1 uint16	44	1.92958	4.89146	3.12968	1x100 double	100	TRUE	TRUE	[]	2355.69	1x100 double	0.966323	51	1.30475	0.713831	2.01859	18.18
021721_S020	4463	40x water	368	[113.500000000000,122.500000000000,22.5000000000000,14,11,9]	368x3 double	368x1 uint16	[120.273927661569,128.336318205940,27.7893807751996]	4470.31	20491	92x2 double	92	1x100 double	1x100 double	5788	4123.12	[119.811710856714,128.810392075449,27.4894952251023]	368x1 uint16	59	1.11846	10.1462	1.72976	1x100 double	100	TRUE	TRUE	[]	2818.86	1x100 double	0.71934	74	0.297995	0.247213	0.545209	26.46
021721_S020	4463	40x water	3621	[229.500000000000,459.500000000000,246.500000000000,53,41,10]	3621x3 double	3621x1 uint16	[250.795756324111,480.677500471233,251.113641031532]	3432.8	25624	991x2 double	991	1x98 double	1x98 double	5535	3202.44	[150.606186823537,1019.70014756914,249.630341826533]	62x1 uint16	65	1.00544	2.39441	4.69173	1x98 double	98	TRUE	TRUE	[]	2337.11	1x98 double	0.476078	252	1.35492	0.934065	2.28898	90.54
021721_S021	4463	40x water	1724	[108.500000000000,663.500000000000,19.5000000000000,31,18,8]	1724x3 double	1724x1 uint16	[125.272189349112,671.561538461539,22.8934911242604]	2509.51	15360	330x2 double	330	1x100 double	1x100 double	7647	3166	[124.554393284359,671.945357456868,22.2400132058599]	1724x1 uint16	17	1.27381	3.37675	5.1028	1x100 double	100	TRUE	TRUE	[]	1380.85	1x100 double	0.707865	23	1.78839	2.10857	3.89696	8.1
021721_S021	4463	40x water	10052	[231.500000000000,721.500000000000,138.500000000000,67,66,11]	10052x3 double	10052x1 uint16	[267.878823782852,759.242998707454,142.475495476088]	4728.82	28160	2167x2 double	2167	1x100 double	1x100 double	5086	2114.07	[249.361986231108,249.026463514715,130.246723049217]	166x1 uint16	25	1.05428	1.12252	5.0677	1x100 double	100	TRUE	FALSE	[]	3084.52	1x100 double	0.551896	142	0.892549	1.49607	2.38861	50.94
021721_S021	4463	40x water	1726	[32.5000000000000,493.500000000000,247.500000000000,20,26,14]	1726x3 double	1726x1 uint16	[41.4978222996516,507.915940766551,254.084059233449]	3405.42	17920	322x2 double	322	1x95 double	1x95 double	3621	1279.72	[99.5792042703060,603.821846797271,225.120305965221]	142x1 uint16	35	1.31496	5.68256	4.68263	1x95 double	95	TRUE	TRUE	[]	2393.04	1x95 double	0.508306	261	1.62	0.549231	2.16923	93.78
021721_S021	4463	40x water	631	[291.500000000000,752.500000000000,269.500000000000,9,13,10]	631x3 double	631x1 uint16	[296.478991596639,758.935294117647,274.163865546218]	4827.89	17920	95x2 double	95	1x75 double	1x75 double	1598	985.632	[78.2670475783628,130.841939445720,243.263576654029]	19x1 uint16	94	1.16923	6.79708	4.09211	1x75 double	75	TRUE	TRUE	[]	3045.05	1x75 double	0.716814	288	0.220909	1.10455	1.32545	103.5
021721_S021	4463	40x water	429	[55.5000000000000,473.500000000000,247.500000000000,12,12,8]	429x3 double	429x1 uint16	[62.2327935222672,479.463562753036,251.985829959514]	2947.88	15360	115x2 double	115	1x97 double	1x97 double	1587	630	[123.672002701790,187.806315433975,224.534853090172]	47x1 uint16	96	1.08163	6.62333	3.84906	1x97 double	97	TRUE	TRUE	[]	1981.22	1x97 double	0.674157	264	0.348387	0.490909	0.839296	94.86
021721_S021	4463	40x water	9696	[50.5000000000000,472.500000000000,246.500000000000,57,63,15]	9696x3 double	9696x1 uint16	[82.1571867794005,501.244715603382,253.972809377402]	2747.99	25600	1607x2 double	1607	1x95 double	1x95 double	1391	606.211	[5.60296926549748,912.272920645946,225.543627365862]	38x1 uint16	121	1.06859	5.14606	5.58953	1x95 double	95	TRUE	TRUE	[]	1747.55	1x95 double	0.578851	260	3.73617	1.94175	5.67792	93.42
021721_S021	4463	40x water	544	[288.500000000000,805.500000000000,241.500000000000,12,22,6]	544x3 double	544x1 uint16	[295.068205666317,816.406086044071,244.154249737671]	4484.71	15360	170x2 double	170	1x100 double	1x100 double	1322	668.224	[116.861366978868,207.868281858761,220.762133292050]	58x1 uint16	131	1	1.85245	5.16107	1x100 double	100	TRUE	TRUE	[]	3538.82	1x100 double	0.314894	243	0.8136	1.98947	2.80307	87.3
021721_S021	4463	40x water	11233	[16.5000000000000,0.500000000000000,270.500000000000,89,31,10]	11233x3 double	11233x1 uint16	[54.5705383416998,12.7297039986152,275.474121516358]	2633.16	17920	1696x2 double	1696	1x74 double	1x74 double	1066	790.125	[249.724094288878,575.487739281759,242.705109950957]	[567;636;661;898;917;1066;938;638]	157	1.17694	0.914801	5.21342	1x74 double	74	TRUE	FALSE	[]	1565.28	1x74 double	0.767599	275	1.0584	1.6966	2.755	98.82
021721_S021	4463	40x water	364	[154.500000000000,813.500000000000,212.500000000000,19,8,6]	364x3 double	364x1 uint16	[162.656998738966,817.248423707440,215.146279949559]	5577.14	20480	108x2 double	108	1x100 double	1x100 double	913	496.025	[24.8417418476891,78.9948087293987,194.928884632831]	40x1 uint16	183	1.07299	2.27372	4.12925	1x100 double	100	TRUE	TRUE	[]	3437.04	1x100 double	0.668966	215	0.884789	2.51053	3.39532	77.22
021721_S021	4463	40x water	3513	[2.50000000000000,454.500000000000,248.500000000000,31,36,13]	3513x3 double	3513x1 uint16	[18.2185872056679,472.301312773495,254.921025213586]	3497.14	20480	625x2 double	625	1x94 double	1x94 double	883	453.111	[254.802967140755,232.163192741540,223.569764590486]	18x1 uint16	188	1.13469	4.40452	5.69424	1x94 double	94	TRUE	TRUE	[]	2203.65	1x94 double	0.596654	261	3.267	3.244	6.511	93.78
021721_S021	4463	40x water	1709	[149.500000000000,30.5000000000000,147.500000000000,21,23,11]	1709x3 double	1709x1 uint16	[157.869216241738,38.8394711992446,152.616619452314]	3172.66	17920	291x2 double	291	1x100 double	1x100 double	838	499.571	[263.142979696883,346.082070346011,135.906491278239]	[327;527;408;838;370;702;325]	198	1.1068	3.61928	5.30702	1x100 double	100	TRUE	TRUE	[]	2137.73	1x100 double	0.469136	154	2.08588	3.11094	5.19683	55.26
021721_S021	4463	40x water	624	[214.500000000000,836.500000000000,210.500000000000,16,17,7]	624x3 double	624x1 uint16	[222.990746860542,845.829477858559,214.155981493721]	6207.18	25600	155x2 double	155	1x100 double	1x100 double	715	537.714	[234.463071200850,430.625132837407,191.332890541977]	[565;664;567;715;279;513;461]	229	1.04902	2.31098	2.88785	1x100 double	100	TRUE	TRUE	[]	4244.65	1x100 double	0.544747	213	0.541395	1.01455	1.55594	76.5
021721_S021	4463	40x water	10355	[118.500000000000,167.500000000000,237.500000000000,72,37,12]	10355x3 double	10355x1 uint16	[152.382898146303,185.470599960136,243.543053617700]	2480.64	25600	1507x2 double	1507	1x100 double	1x100 double	691	654	[127.321100917431,156.673292558614,216]	[641;691;630]	235	1.14794	0.429394	4.52692	1x100 double	100	TRUE	TRUE	[]	1508.48	1x100 double	0.682432	242	0.659048	3.37211	4.03116	86.94
021721_S021	4463	40x water	2042	[196.500000000000,292.500000000000,136.500000000000,32,31,6]	2042x3 double	2042x1 uint16	[215.560695538058,310.450787401575,139.242125984252]	3821.19	20480	544x2 double	544	1x100 double	1x100 double	673	541.2	[118.196230598670,340.607538802661,125]	[481;540;673;522;490]	238	1.00368	3.81142	3.37729	1x100 double	100	TRUE	TRUE	[]	2517.65	1x100 double	0.558879	139	0.584622	0.789231	1.37385	49.86
021721_S021	4463	40x water	1050	[73.5000000000000,873.500000000000,100.500000000000,27,20,10]	1050x3 double	1050x1 uint16	[84.6838469713071,884.924017003188,104.845908607864]	4588.5	25600	258x2 double	258	1x100 double	1x100 double	641	354.375	[127.814814814815,467.589417989418,92.1044091710758]	[192;255;175;350;479;641;318;425]	244	1.24038	2.05398	2.85271	1x100 double	100	TRUE	TRUE	[]	3046.2	1x100 double	0.482085	103	0.52486	0.9	1.42486	36.9
021721_S021	4463	40x water	4459	[205.500000000000,757.500000000000,210.500000000000,25,78,9]	4459x3 double	4459x1 uint16	[218.486965266496,794.673783553802,214.621644619788]	7421.65	40960	1020x2 double	1020	1x100 double	1x100 double	617	363.143	[195.038945712038,387.837922895358,191.869787568843]	[331;394;440;617;267;239;254]	247	1.13063	2.0641	2.60027	1x100 double	100	TRUE	TRUE	[]	4813.8	1x100 double	0.503128	212	0.20953	5.51093	5.72046	76.14
021721_S021	4463	40x water	1394	[129.500000000000,861.500000000000,142.500000000000,27,12,10]	1394x3 double	1394x1 uint16	[143.391959798995,867.173173560108,148.159257827600]	4750.88	23040	239x2 double	239	1x100 double	1x100 double	575	575	[158,19,131]	575	255	1.01974	3.08983	5.58065	1x100 double	100	TRUE	TRUE	[]	3095.56	1x100 double	0.598616	149	1.8075	4.78636	6.59386	53.46
021721_S021	4463	40x water	1439	[95.5000000000000,343.500000000000,148.500000000000,21,31,9]	1439x3 double	1439x1 uint16	[106.483074753173,363.033850493653,152.576163610719]	2522.64	20480	324x2 double	324	1x100 double	1x100 double	494	454.667	[22.9428152492669,96,136.709677419355]	[396;474;494]	277	1.07407	2.34598	5.57471	1x100 double	100	TRUE	TRUE	[]	1651.36	1x100 double	0.502392	152	1.1268	3.81214	4.93894	54.54
021721_S021	4463	40x water	2598	[158.500000000000,840.500000000000,192.500000000000,48,37,8]	2598x3 double	2598x1 uint16	[185.030043910330,859.446960942917,196.410214929512]	4263.71	23040	608x2 double	608	1x100 double	1x100 double	348	348	[283,72,176]	348	309	1.0112	1.51931	4.15235	1x100 double	100	TRUE	TRUE	[]	2871.58	1x100 double	0.567449	195	0.452636	1.65194	2.10457	70.02
021721_S021	4463	40x water	20076	[44.5000000000000,846.500000000000,195.500000000000,67,50,15]	20076x3 double	20076x1 uint16	[80.6484663965981,873.425861157940,202.521852904914]	5067.85	40960	2169x2 double	2169	1x100 double	1x100 double	268	268	[242,1020,178]	268	327	1.03471	6.03478	5.84079	1x100 double	100	TRUE	TRUE	[]	2899.92	1x100 double	0.766382	201	1.02954	9.96117	10.9907	72.18
021721_S021	4463	40x water	12494	[119.500000000000,463.500000000000,244.500000000000,77,59,17]	12494x3 double	12494x1 uint16	[162.559221902017,495.454322766571,251.626152737752]	2843.99	23040	1683x2 double	1683	1x97 double	1x97 double	237	237	[21,1017,222]	237	330	1.1771	6.49643	5.22698	1x97 double	97	TRUE	TRUE	[]	1775.12	1x97 double	0.609254	260	4.38908	1.22186	5.61095	93.42
021721_S021	4463	40x water	885	[70.5000000000000,855.500000000000,101.500000000000,17,18,9]	885x3 double	885x1 uint16	[80.9243486973948,865.347194388778,105.070641282565]	5773.74	28160	193x2 double	193	1x100 double	1x100 double	223	192	[185.580729166667,436,92]	[161;223]	333	1.05376	4.70928	5.53061	1x100 double	100	TRUE	TRUE	[]	4111.92	1x100 double	0.425806	108	2.39586	2.67429	5.07015	38.7
021721_S021	4463	40x water	1212	[29.5000000000000,468.500000000000,249.500000000000,22,21,10]	1212x3 double	1212x1 uint16	[39.3800268096515,481.317024128686,254.563672922252]	3151.42	20480	230x2 double	230	1x94 double	1x94 double	146	146	[47,114,225]	146	334	1.01299	5.33237	4.9359	1x94 double	94	TRUE	TRUE	[]	1780.87	1x94 double	0.65	259	2.74909	1.89	4.63909	93.06
021721_S026	4463	40x water	806	[13.5000000000000,180.500000000000,109.500000000000,17,16,7]	806x3 double	806x1 uint16	[21.7563338301043,188.527570789866,112.690760059613]	4262.43	20480	200x2 double	200	1x100 double	1x100 double	44969	19083.8	[198.416328196132,179.651637588194,114.399763385121]	12556x1 uint16	3	1.37879	2.11372	4.87912	1x100 double	100	TRUE	TRUE	[]	2944	1x100 double	0.447826	113	1.1671	1.315	2.4821	40.5
021721_S026	4463	40x water	12556	[176.500000000000,146.500000000000,108.500000000000,52,70,11]	12556x3 double	12556x1 uint16	[198.415775401070,181.869770368040,114.590122680088]	2592.62	23040	2288x2 double	2288	1x100 double	1x100 double	40109	18394	[272.457483076101,451.974117219750,112.043903164086]	2429x1 uint16	6	1.04303	3.59407	5.58671	1x100 double	100	TRUE	TRUE	[]	2037.48	1x100 double	0.281164	113	0.723934	2.60082	3.32475	40.5
021721_S026	4463	40x water	982	[29.5000000000000,43.5000000000000,110.500000000000,22,24,6]	982x3 double	982x1 uint16	[39.1162491971741,55.9113680154143,113.087347463070]	4058.98	25600	323x2 double	323	1x100 double	1x100 double	27534	15167.7	[62.8192674076625,236.436336651215,112.970237195886]	1073x1 uint16	8	1.07879	4.82869	5.32022	1x100 double	100	TRUE	TRUE	[]	3067.24	1x100 double	0.27907	113	0.817043	1.13538	1.95243	40.5
021721_S026	4463	40x water	5337	[106.500000000000,165.500000000000,109.500000000000,49,57,10]	5337x3 double	5337x1 uint16	[131.752239834597,194.970192970365,114.114920744314]	2784.01	28160	1126x2 double	1126	1x100 double	1x100 double	26408	14987.7	[22.4735643398303,188.401999996358,112.778006298281]	806x1 uint16	9	1.0261	8.1464	5.57234	1x100 double	100	TRUE	TRUE	[]	2103.02	1x100 double	0.340541	116	1.95204	1.0726	3.02464	41.58
021721_S026	4463	40x water	23428	[112.500000000000,463.500000000000,209.500000000000,63,134,26]	23428x3 double	23428x1 uint16	[136.105449556506,526.555197498564,222.248580179950]	3424.77	28160	3893x2 double	3893	1x100 double	1x100 double	15306	12181.2	[182.027171857626,527.661399464183,208.254154503600]	145x1 uint16	28	1.01695	7.7973	6.02121	1x100 double	100	TRUE	TRUE	[]	2657.32	1x100 double	0.306855	233	4.95559	10.6515	15.6071	83.7
021721_S026	4463	40x water	1386	[9.50000000000000,296.500000000000,215.500000000000,23,16,8]	1386x3 double	1386x1 uint16	[22.1686991869919,303.789972899729,219.436314363144]	2726.23	17920	287x2 double	287	1x100 double	1x100 double	12256	11094.8	[134.287269879898,607.883309110165,211.969315441988]	32x1 uint16	34	1.28758	2.02366	3.2132	1x100 double	100	TRUE	TRUE	[]	1668.01	1x100 double	0.668449	218	0.229592	2.29	2.51959	78.3
021721_S026	4463	40x water	708	[236.500000000000,504.500000000000,207.500000000000,25,13,7]	708x3 double	708x1 uint16	[250.004524886878,511.257918552036,211.311085972851]	3196.38	17920	203x2 double	203	1x100 double	1x100 double	12081	10374.1	[29.9605863845276,319.182570406243,207.005968722046]	25x1 uint16	35	1.24427	5.15187	4.15337	1x100 double	100	TRUE	TRUE	[]	2774.38	1x100 double	0.490909	233	0.918	1.548	2.466	83.7
021721_S026	4463	40x water	3043	[120.500000000000,562.500000000000,203.500000000000,59,37,8]	3043x3 double	3043x1 uint16	[151.480601188396,588.014680181755,206.910520796924]	2406.89	20480	947x2 double	947	1x100 double	1x100 double	8417	5593.21	[147.594432028606,607.791237256029,200.619905072047]	84x1 uint16	59	1.14062	7.44617	3.80822	1x100 double	100	TRUE	TRUE	[]	1965.28	1x100 double	0.429161	237	6.88438	4.26857	11.153	85.14
021721_S026	4463	40x water	80990	[181.500000000000,502.500000000000,201.500000000000,116,142,34]	80990x3 double	80990x1 uint16	[239.757959837326,570.358503487368,217.059696145985]	3000.12	28160	10592x2 double	10592	1x100 double	1x100 double	6075	3957.8	[222.401302431908,1010.86767231655,199.476253929103]	84x1 uint16	91	1.02605	6.83927	6.20919	1x100 double	100	TRUE	TRUE	[]	2302.6	1x100 double	0.376194	224	2.32152	17.9555	20.2771	80.46
021721_S010	4465	40x water	1030	[209.500000000000,605.500000000000,282.500000000000,29,12,7]	1030x3 double	1030x1 uint16	[223.987169811321,610.354716981132,286.053584905660]	3293.2	17920	233x2 double	233	1x63 double	1x63 double	2923	972.145	[8.15292190789685,136.440669452490,254.249500368712]	385x1 uint16	32	1.22973	4.82318	3.7033	1x63 double	63	TRUE	TRUE	[]	2109.53	1x63 double	0.75	287	1.36653	0.934054	2.30058	103.14
021821_S010	4465	40x water	15129	[127.500000000000,609.500000000000,280.500000000000,124,64,11]	15129x3 double	15129x1 uint16	[199.472577449568,640.628692363112,285.312815201729]	3757.85	28160	3211x2 double	3211	1x64 double	1x64 double	2049	1043.39	[294.465788435157,902.418224869863,248.732640520174]	51x1 uint16	52	1.04105	0.196718	4.8056	1x64 double	64	TRUE	TRUE	[]	2345.54	1x64 double	0.549286	284	0.624828	2.86714	3.49197	102.06
021821_S010	4465	40x water	1663	[152.500000000000,682.500000000000,257.500000000000,39,14,15]	1663x3 double	1663x1 uint16	[173.690748440748,689.985446985447,267.435031185031]	5923.56	25600	345x2 double	345	1x82 double	1x82 double	750	404.886	[9.61313499859669,993.095200673590,229.055739545327]	44x1 uint16	113	1.05902	6.38099	5.47059	1x82 double	82	TRUE	TRUE	[]	3554.32	1x82 double	0.615866	270	1.76507	2.94787	4.71294	97.02
021821_S010	4465	40x water	7068	[121.500000000000,879.500000000000,268.500000000000,30,100,10]	7068x3 double	7068x1 uint16	[138.551396769969,915.974356176342,273.193801833261]	3319.16	23040	1362x2 double	1362	1x76 double	1x76 double	720	358.125	[291.993717277487,577.315532286213,236.194764397906]	[257;276;720;573;208;273;242;316]	116	1.095	2.61656	3.03196	1x76 double	76	TRUE	TRUE	[]	2095.74	1x76 double	0.591928	271	0.464373	7.131	7.59537	97.38
021821_S010	4465	40x water	33976	[109.500000000000,679.500000000000,239.500000000000,122,80,16]	33976x3 double	33976x1 uint16	[178.708196299631,724.828430742095,247.007918863799]	4100.93	33280	4742x2 double	4742	1x100 double	1x100 double	709	355.226	[285.948056665456,791.058390846349,213.842444605884]	31x1 uint16	118	1.06802	25.0862	5.1828	1x100 double	100	TRUE	TRUE	[]	2504.39	1x100 double	1.20586	268	3.07014	5.09209	8.16222	96.3
021821_S010	4465	40x water	97564	[4.50000000000000,765.500000000000,311.500000000000,141,146,18]	97564x3 double	97564x1 uint16	[65.5026448437407,850.071529383858,322.168748146830]	4424.71	30720	9125x2 double	9125	1x27 double	1x27 double	600	596	[9.49664429530201,98,272]	[600;592]	133	1.01822	26.7926	-0.239001	1x27 double	27	TRUE	TRUE	[]	2292.92	1x27 double	1.03389	325	2.51541	[]	[]	116.82
021821_S010	4465	40x water	8744	[2.50000000000000,902.500000000000,109.500000000000,56,67,14]	8744x3 double	8744x1 uint16	[36.2783813842074,942.868423303961,118.156300795620]	3422.21	23040	1770x2 double	1770	1x100 double	1x100 double	396	330.6	[29.0528332325066,340.531558782013,98.1589030046380]	15x1 uint16	157	1.11986	1.00499	4.55445	1x100 double	100	TRUE	TRUE	[]	2218.67	1x100 double	0.550196	117	0.68256	4.16219	4.84475	41.94
021821_S010	4465	40x water	24047	[107.500000000000,670.500000000000,260.500000000000,136,108,16]	24047x3 double	24047x1 uint16	[179.126179909834,725.336291913215,266.757185122570]	6045.12	46080	4464x2 double	4464	1x82 double	1x82 double	355	319	[284,453.443573667712,228]	[355;283]	159	1.07979	28.6406	5.17077	1x82 double	82	TRUE	TRUE	[]	3845.16	1x82 double	0.509471	268	2.06486	3.76326	5.82812	96.3
021821_S010	4465	40x water	2042	[75.5000000000000,108.500000000000,99.5000000000000,33,28,11]	2042x3 double	2042x1 uint16	[89.7896919431280,119.445497630332,106.634478672986]	2116.2	12800	449x2 double	449	1x100 double	1x100 double	301	289.5	[17,64,88.5198618307427]	[278;301]	172	1	1.87454	5	1x100 double	100	TRUE	TRUE	[]	1391.18	1x100 double	0.463115	106	0.883333	2.214	3.45733	37.98
021821_S010	4465	40x water	3564	[148.500000000000,164.500000000000,225.500000000000,35,57,14]	3564x3 double	3564x1 uint16	[164.751134846462,186.478771695594,231.326301735648]	2690.01	20480	683x2 double	683	1x100 double	1x100 double	169	169	[14,278,202]	169	188	1.06406	12.8593	4.91973	1x100 double	100	TRUE	TRUE	[]	1870.34	1x100 double	0.557114	260	11.6836	3.168	14.8516	93.42
021821_S004	4465	40x water	976	[43.5000000000000,952.500000000000,278.500000000000,29,9,8]	976x3 double	976x1 uint16	[57.5326876513317,956.831476997579,282.025665859564]	5416.39	25600	212x2 double	212	1x67 double	1x67 double	6692	2462.28	[294.037792925000,766.629730657634,255.918941890211]	194x1 uint16	52	1.08333	6.1537	5.8733	1x67 double	67	TRUE	TRUE	[]	3683.02	1x67 double	0.468852	284	1.83316	1.60971	3.44287	102.06
021821_S004	4465	40x water	9327	[0.500000000000000,990.500000000000,320.500000000000,102,34,9]	9327x3 double	9327x1 uint16	[50.3774476351088,1002.88133615507,325.290855085464]	3070.97	17920	1757x2 double	1757	1x24 double	1x24 double	6129	3121.63	[286.374208058426,863.238877961741,296.899634009710]	193x1 uint16	64	1.17893	4.40421	2.87514	1x24 double	24	TRUE	TRUE	[]	2153.09	1x24 double	0.445524	325	0.968127	1.52333	2.49145	116.82
021821_S004	4465	40x water	14625	[0.500000000000000,941.500000000000,255.500000000000,122,29,18]	14625x3 double	14625x1 uint16	[57.1471663619744,955.638299817185,264.989716636197]	3829.94	23040	1895x2 double	1895	1x84 double	1x84 double	5338	1981.63	[14.0150459929204,541.304124052276,233.203694131769]	206x1 uint16	73	1.08315	4.97328	5.95306	1x84 double	84	TRUE	TRUE	[]	2403.29	1x84 double	1.01574	281	1.61534	5.01133	6.62668	100.98
021821_S004	4465	40x water	544	[0.500000000000000,926.500000000000,261.500000000000,11,11,10]	544x3 double	544x1 uint16	[5.36363636363636,932.229603729604,267.301864801865]	4037.65	15360	101x2 double	101	1x82 double	1x82 double	3655	1554	[6.65125482625483,476.506000643501,238.489414414414]	40x1 uint16	124	1.36478	3.98474	4.67742	1x82 double	82	TRUE	TRUE	[]	2458.61	1x82 double	1.26804	282	1.26	1.79455	3.05455	101.34
021821_S004	4465	40x water	1677	[176.500000000000,278.500000000000,97.5000000000000,31,16,10]	1677x3 double	1677x1 uint16	[195.472038902397,286.513025356026,101.392150052101]	4394.9	28160	302x2 double	302	1x100 double	1x100 double	3166	2461.07	[292.271889142649,620.729091647868,91.5714646004680]	29x1 uint16	149	1.20238	7.48353	3.85149	1x100 double	100	TRUE	TRUE	[]	2407.42	1x100 double	0.852113	103	1.8825	9.91385	11.7963	36.9
021821_S004	4465	40x water	4211	[6.50000000000000,876.500000000000,212.500000000000,43,39,9]	4211x3 double	4211x1 uint16	[22.4437237695536,897.347958794353,216.997710797406]	3186.78	23040	899x2 double	899	1x100 double	1x100 double	3080	1382.35	[158.747565089866,36.2016519903459,194.225978074300]	110x1 uint16	154	1.00797	1.74287	4.92885	1x100 double	100	TRUE	TRUE	[]	2144.25	1x100 double	0.454183	216	0.88	2.67882	3.55882	77.58
021821_S004	4465	40x water	782	[79.5000000000000,948.500000000000,278.500000000000,22,14,6]	782x3 double	782x1 uint16	[89.2106754841757,955.324988190836,281.327822390175]	6930.33	25600	216x2 double	216	1x68 double	1x68 double	2796	1579.81	[294.575735552690,166.282194350018,251.384222248271]	27x1 uint16	168	1.05724	5.09336	6.14331	1x68 double	68	TRUE	TRUE	[]	4551.11	1x68 double	0.466146	282	1.23113	1.05462	2.28575	101.34
021821_S004	4465	40x water	598	[34.5000000000000,978.500000000000,278.500000000000,17,16,8]	598x3 double	598x1 uint16	[41.5175242356450,987.147651006711,281.390753169277]	5740.74	23040	158x2 double	158	1x68 double	1x68 double	2308	1264.95	[294.469007150814,453.027004204247,251.149071112868]	44x1 uint16	194	1.14607	3.85528	5.72059	1x68 double	68	TRUE	TRUE	[]	3937.22	1x68 double	0.481481	281	0.682941	2.27143	2.95437	100.98
021821_S004	4465	40x water	47648	[0.500000000000000,974.500000000000,250.500000000000,162,50,21]	47648x3 double	47648x1 uint16	[65.4353651146562,999.413732597811,262.601027470309]	3658.71	25600	4960x2 double	4960	1x86 double	1x86 double	1505	727.871	[40.9404804112746,453.748005672753,227.636057436625]	31x1 uint16	267	1.01765	6.83502	6.33897	1x86 double	86	TRUE	TRUE	[]	2270.07	1x86 double	0.907713	280	6.91618	5.33655	12.2527	100.62
021821_S004	4465	40x water	1951	[111.500000000000,319.500000000000,147.500000000000,33,16,9]	1951x3 double	1951x1 uint16	[132.478363123236,329.412511759172,152.096895578551]	2789.63	20480	315x2 double	315	1x100 double	1x100 double	1491	949.714	[182.713447653430,596.183062575211,135.322051744886]	14x1 uint16	268	1.00813	5.32596	5.60484	1x100 double	100	TRUE	TRUE	[]	1755.43	1x100 double	0.560185	155	2.55506	0.982105	3.53717	55.62
021821_S004	4465	40x water	1176	[82.5000000000000,985.500000000000,277.500000000000,39,12,8]	1176x3 double	1176x1 uint16	[102.027173913043,991.223731884058,281.937500000000]	4806.53	23040	294x2 double	294	1x67 double	1x67 double	1425	1020	[63.3700206398349,991.912435500516,251.334726522188]	19x1 uint16	275	1.01439	6.69908	6.14539	1x67 double	67	TRUE	TRUE	[]	3674.56	1x67 double	0.343602	284	1.99884	1.26973	3.26857	102.06
021821_S004	4465	40x water	297	[61.5000000000000,988.500000000000,279.500000000000,15,19,8]	297x3 double	297x1 uint16	[70.5541044776119,997.953358208955,283.600746268657]	4620.07	17920	128x2 double	128	1x65 double	1x65 double	1098	1006.5	[30,398,252.545454545455]	[915;1098]	310	1.11966	6.34569	5.41985	1x65 double	65	TRUE	TRUE	[]	3680	1x65 double	0.396739	285	0.312857	1.39091	1.70377	102.42
021821_S004	4465	40x water	2108	[1.50000000000000,942.500000000000,277.500000000000,35,26,9]	2108x3 double	2108x1 uint16	[13.8326751195178,955.101018499273,282.403034712118]	5842.58	25600	477x2 double	477	1x67 double	1x67 double	977	715.6	[28.7934600335383,456.376187814422,250]	[660;674;977;672;595]	327	1.0054	4.61887	6.36315	1x67 double	67	TRUE	TRUE	[]	4094.93	1x67 double	0.373526	282	1.10571	2.96182	4.06753	101.34
021821_S004	4465	40x water	4546	[213.500000000000,313.500000000000,251.500000000000,56,29,10]	4546x3 double	4546x1 uint16	[238.839124624123,327.985967256933,256.393250918811]	3370.91	23040	810x2 double	810	1x93 double	1x93 double	153	153	[283,161,227]	153	406	1.10594	3.2386	5.4486	1x93 double	93	TRUE	TRUE	[]	2120.69	1x93 double	0.670641	257	1.25839	1.19769	2.45609	92.34
030321_S005	4466	40x water	1516	[85.5000000000000,553.500000000000,19.5000000000000,28,15,7]	1516x3 double	1516x1 uint16	[101.114451185880,561.798124655268,21.9768339768340]	6123.06	35840	334x2 double	334	1x100 double	1x100 double	21439	8956.26	[101.342514715680,561.621497140825,21.4387737711573]	1516x1 uint16	1	1.14232	1.10711	4.28525	1x100 double	100	TRUE	TRUE	[]	3885.99	1x100 double	0.635108	20	0.596791	1.62277	2.21956	7.02
030321_S005	4466	40x water	43006	[51.5000000000000,340.500000000000,114.500000000000,80,85,18]	43006x3 double	43006x1 uint16	[88.1860636130061,381.474049791796,123.932612740321]	6718.76	46080	3463x2 double	3463	1x100 double	1x100 double	20488	7488.48	[8.09527139052478,1017.62741138077,110.086381334634]	89x1 uint16	3	1.1092	3.92917	6.06736	1x100 double	100	TRUE	TRUE	[]	3460.4	1x100 double	1.04273	127	3.0791	15.7132	18.7923	45.54
030321_S005	4466	40x water	32101	[187.500000000000,744.500000000000,240.500000000000,79,92,24]	32101x3 double	32101x1 uint16	[227.262464400303,794.000648905873,253.723998702188]	4424.28	35840	3583x2 double	3583	1x95 double	1x95 double	11298	5835.47	[294.461992743676,347.653163171482,227.790587415860]	93x1 uint16	22	1.06374	6.54681	5.92355	1x95 double	95	TRUE	TRUE	[]	2810.07	1x95 double	0.569031	272	7.94208	[]	[]	97.74
030321_S005	4466	40x water	8499	[5.50000000000000,690.500000000000,268.500000000000,55,85,11]	8499x3 double	8499x1 uint16	[40.4257530696976,740.789317157917,273.550160478196]	10229.5	48640	1725x2 double	1725	1x75 double	1x75 double	6988	3500.2	[7.97098957929806,943.034482257690,246.284971333385]	59x1 uint16	47	1.00091	3.32514	5.66667	1x75 double	75	TRUE	TRUE	[]	6811.83	1x75 double	0.489542	274	2.34973	8.2215	10.5712	98.46
030321_S005	4466	40x water	9259	[212.500000000000,379.500000000000,61.5000000000000,64,71,14]	9259x3 double	9259x1 uint16	[248.437259100642,424.537687366167,68.5083511777302]	3873.59	20480	1535x2 double	1535	1x100 double	1x100 double	6947	3069.96	[182.739390262237,187.906155366079,61.8625119019494]	182x1 uint16	48	1.0093	4.75517	5.34101	1x100 double	100	TRUE	TRUE	[]	2736.78	1x100 double	0.424132	73	3.42505	5.29109	8.71614	26.1
030321_S005	4466	40x water	2409	[188.500000000000,137.500000000000,105.500000000000,24,16,21]	2409x3 double	2409x1 uint16	[200.829535095716,146.548997265269,116.508204193254]	4663.05	28160	273x2 double	273	1x100 double	1x100 double	4226	2800.43	[294.813428963833,415.152012818556,101.649378910423]	117x1 uint16	97	1.13793	4.11812	5.95868	1x100 double	100	TRUE	TRUE	[]	2616.26	1x100 double	0.845878	124	3.48	3.09474	6.57474	44.46
030321_S005	4466	40x water	57959	[3.50000000000000,613.500000000000,226.500000000000,76,185,20]	57959x3 double	57959x1 uint16	[38.9203246604727,712.740994875409,235.584877201442]	7145.2	46080	6626x2 double	6626	1x100 double	1x100 double	3678	2540	[40.1117344706912,308.114315398075,211.050207786527]	36x1 uint16	124	1.00313	4.01677	6.30408	1x100 double	100	TRUE	TRUE	[]	4430.74	1x100 double	0.758197	276	4.97116	15.4273	20.3985	99.18
030321_S005	4466	40x water	4830	[184.500000000000,535.500000000000,104.500000000000,48,25,12]	4830x3 double	4830x1 uint16	[211.226082891867,547.002960423808,111.227017762543]	3401.67	25600	678x2 double	678	1x100 double	1x100 double	3569	2736.25	[146.774652483195,180.503204333355,101.577054101677]	28x1 uint16	129	1.05742	1.81726	5.70287	1x100 double	100	TRUE	TRUE	[]	2110.68	1x100 double	0.602862	112	1.2996	1.42421	2.72381	40.14
030321_S005	4466	40x water	3608	[12.5000000000000,143.500000000000,123.500000000000,28,27,15]	3608x3 double	3608x1 uint16	[26.9074051180616,159.141921127457,131.484485103227]	5739.42	40960	419x2 double	419	1x100 double	1x100 double	3058	1514.04	[293.465724924251,161.816690471669,119.954352187446]	80x1 uint16	159	1.05941	8.11663	5.21184	1x100 double	100	TRUE	TRUE	[]	3415.37	1x100 double	0.644007	131	1.71652	16.148	17.8645	46.98
030321_S005	4466	40x water	2806	[199.500000000000,570.500000000000,106.500000000000,21,40,9]	2806x3 double	2806x1 uint16	[207.070245573958,588.578716923663,111.171330668190]	4792.47	25600	514x2 double	514	1x100 double	1x100 double	2625	2273.25	[296,473.446607280326,101.468272297372]	[2625;2210;2407;1851]	183	1.00398	0.955076	4.77778	1x100 double	100	TRUE	TRUE	[]	3576.03	1x100 double	0.309192	110	0.27	1.64	1.91	39.42
030321_S005	4466	40x water	1882	[163.500000000000,311.500000000000,37.5000000000000,38,17,9]	1882x3 double	1882x1 uint16	[183.027415580074,320.263122701438,42.3212972250084]	4068.52	25600	429x2 double	429	1x100 double	1x100 double	2207	1347.93	[146.385255811397,555.099961532121,37.0624828268396]	27x1 uint16	215	1.04531	2.86942	3.32198	1x100 double	100	TRUE	TRUE	[]	2804.66	1x100 double	0.457447	42	0.602819	1.27565	1.87847	14.94
030321_S005	4466	40x water	15919	[264.500000000000,454.500000000000,44.5000000000000,34,68,18]	15919x3 double	15919x1 uint16	[281.724110807114,487.387380300958,52.8050957592339]	4702.2	33280	1628x2 double	1628	1x100 double	1x100 double	2167	1131.52	[7.98133369041243,897.299625066952,46.1904124263524]	33x1 uint16	221	1.03226	6.96796	4.97083	1x100 double	100	TRUE	TRUE	[]	2866.63	1x100 double	0.636862	53	1.90815	15.0513	16.9594	18.9
030321_S005	4466	40x water	1002	[38.5000000000000,774.500000000000,270.500000000000,14,17,9]	1002x3 double	1002x1 uint16	[46.7591994835378,783.030987734022,274.546158812137]	7915.05	46080	172x2 double	172	1x74 double	1x74 double	2087	1718	[189.488843616608,537.312378734963,247.290454016298]	[2087;1668;2007;1552;1514;1480]	224	1.15721	3.82802	4.23774	1x74 double	74	TRUE	TRUE	[]	5447.44	1x74 double	0.453552	274	0.706667	2.46732	3.17398	98.46
030321_S005	4466	40x water	7769	[140.500000000000,422.500000000000,60.5000000000000,65,39,15]	7769x3 double	7769x1 uint16	[169.069424517775,446.090467081141,67.9890004782401]	4134.09	30720	1145x2 double	1145	1x100 double	1x100 double	1903	1077.4	[290.160615235022,201.257121389583,59.3378267883583]	42x1 uint16	241	1.10326	2.97344	6.18473	1x100 double	100	TRUE	TRUE	[]	2716.51	1x100 double	0.40823	70	1.995	2.79818	4.79318	25.02
030321_S005	4466	40x water	4994	[139.500000000000,406.500000000000,60.5000000000000,64,20,15]	4994x3 double	4994x1 uint16	[171.579005986357,414.327300570792,67.6797995266602]	3682.11	25600	711x2 double	711	1x100 double	1x100 double	1357	844.2	[293.449656479507,12.8592750533049,58]	[437;1357;529;686;1212]	280	1	1.97774	5.71605	1x100 double	100	TRUE	TRUE	[]	2419.58	1x100 double	0.514881	68	1.48721	4.73538	6.2226	24.3
030321_S005	4466	40x water	3840	[37.5000000000000,882.500000000000,171.500000000000,26,30,11]	3840x3 double	3840x1 uint16	[50.3588384908860,900.302140737601,177.275222551929]	6290.67	38400	558x2 double	558	1x100 double	1x100 double	1094	976.333	[202.908159781495,692,160]	[1052;1094;783]	304	1.09945	2.47159	5.1876	1x100 double	100	TRUE	TRUE	[]	3982.22	1x100 double	0.578341	177	1.22308	4.15038	5.37346	63.54
030321_S005	4466	40x water	170	[35.5000000000000,760.500000000000,307.500000000000,10,10,4]	170x3 double	170x1 uint16	[39.9869158878505,765.820560747664,309.895327102804]	16112.9	43520	73x2 double	73	1x39 double	1x39 double	1019	479.9	[270.171077307772,608.050427172328,287.828922692228]	20x1 uint16	312	1.17949	4.02944	4.34058	1x39 double	39	TRUE	TRUE	[]	13291	1x39 double	0.242744	309	0.66	0.295714	0.955714	111.06
030321_S005	4466	40x water	28478	[51.5000000000000,106.500000000000,122.500000000000,58,82,20]	28478x3 double	28478x1 uint16	[83.2978039550975,136.540350543866,132.141500023750]	5677.61	53760	2703x2 double	2703	1x100 double	1x100 double	979	769.875	[204.355577204092,934.480435135574,116.939113492450]	[849;727;979;954;645;790;741;474]	316	1.02613	6.76473	6.04615	1x100 double	100	TRUE	TRUE	[]	3506.15	1x100 double	0.632361	134	2.68968	20.6175	23.3071	48.06
030321_S005	4466	40x water	16668	[140.500000000000,415.500000000000,152.500000000000,105,103,13]	16668x3 double	16668x1 uint16	[185.266032773619,468.329435565446,159.183775035404]	3795.92	30720	3011x2 double	3011	1x100 double	1x100 double	684	460.5	[210.985342019544,928.681324647123,140]	[299;587;684;272]	340	1.11437	1.99755	5.20354	1x100 double	100	TRUE	TRUE	[]	2646.72	1x100 double	0.427241	160	1.32319	1.77231	3.0955	57.42
030321_S012	4466	40x water	178197	[118.500000000000,124.500000000000,114.500000000000,179,173,41]	178197x3 double	178197x1 uint16	[229.695388428696,214.829475749111,139.296039289773]	5324.05	65535	12707x2 double	12707	1x100 double	1x100 double	17029	6620.36	[288.584701698474,351.322544100987,106.570651628137]	182x1 uint16	9	1.0215	4.21177	6.3854	1x100 double	100	TRUE	TRUE	[]	2903.9	1x100 double	0.939864	145	3.17099	9.58089	12.7519	52.02
030321_S012	4466	40x water	3386	[198.500000000000,283.500000000000,130.500000000000,34,13,20]	3386x3 double	3386x1 uint16	[213.290318266916,290.697780155122,143.183204065258]	5653.77	30720	324x2 double	324	1x100 double	1x100 double	13417	8034.96	[24.3544421045009,86.0141616029351,123.645723837051]	165x1 uint16	19	1.07256	4.591	5.4482	1x100 double	100	TRUE	TRUE	[]	3516.05	1x100 double	0.764045	149	3.08308	6.06375	9.14683	53.46
030321_S012	4466	40x water	835	[127.500000000000,1001.50000000000,124.500000000000,15,15,8]	835x3 double	835x1 uint16	[135.708547008547,1009.51111111111,128.906837606838]	3587.07	17920	171x2 double	171	1x100 double	1x100 double	5224	4453.75	[194.655814388624,933.025053793620,119.384282907662]	12x1 uint16	111	1.32	7.31386	4.31313	1x100 double	100	TRUE	TRUE	[]	2560	1x100 double	0.444444	129	1.26462	1.52	2.78462	46.26
030321_S012	4466	40x water	470	[1.50000000000000,735.500000000000,191.500000000000,27,20,5]	470x3 double	470x1 uint16	[15.3093922651934,743.718232044199,193.505524861878]	3943.49	23040	200x2 double	200	1x100 double	1x100 double	4481	2578.36	[154.566709144804,138.425741751392,180.971396514946]	28x1 uint16	136	1.6	4.1409	1.91071	1x100 double	100	TRUE	TRUE	[]	2816	1x100 double	0.640909	192	0.20304	0.93375	1.13679	68.94
030321_S012	4466	40x water	166	[238.500000000000,285.500000000000,128.500000000000,8,11,5]	166x3 double	166x1 uint16	[242.547619047619,291.458333333333,130.886904761905]	5181.69	17920	63x2 double	63	1x100 double	1x100 double	4189	4124	[67.5078806983511,19,119]	[4059;4189]	144	1.05405	6.49853	4.86325	1x100 double	100	TRUE	TRUE	[]	3372.7	1x100 double	1.33735	152	3.735	4.27935	8.01435	54.54
030321_S012	4466	40x water	1088	[81.5000000000000,559.500000000000,231.500000000000,38,35,8]	1088x3 double	1088x1 uint16	[94.8055713473565,572.922683342809,235.162592382035]	4138.82	28160	378x2 double	378	1x100 double	1x100 double	2777	1797.19	[293.803890858132,385.909096529552,222.625401862996]	27x1 uint16	214	1.36893	2.44188	3.44681	1x100 double	100	TRUE	TRUE	[]	2722.54	1x100 double	0.587065	234	0.681702	4.18846	4.87016	84.06
030321_S012	4466	40x water	1102	[273.500000000000,922.500000000000,223.500000000000,22,15,8]	1102x3 double	1102x1 uint16	[285.530852105779,927.891283055828,227.799216454456]	4743.67	28160	233x2 double	233	1x100 double	1x100 double	2138	2138	[219,636,212]	2138	255	1.15819	5.73188	1.81951	1x100 double	100	TRUE	TRUE	[]	3438.97	1x100 double	0.392971	225	0.133373	1.79438	1.92775	80.82
030321_S012	4466	40x water	19896	[0.500000000000000,533.500000000000,229.500000000000,78,105,11]	19896x3 double	19896x1 uint16	[34.0481551150340,573.655274200550,234.767877297063]	4446.16	30720	4200x2 double	4200	1x100 double	1x100 double	1659	1350.5	[168.685918795508,1016.69418733802,218.518079723559]	[1312;1172;1421;1233;1306;1659]	281	1.16043	0.568024	4.10468	1x100 double	100	TRUE	TRUE	[]	3029.94	1x100 double	0.513579	234	0.661355	1.90364	2.56499	84.06
030321_S043	4466	40x water	1444	[224.500000000000,314.500000000000,175.500000000000,19,21,8]	1444x3 double	1444x1 uint16	[233.847783112115,326.131883648687,179.778876023722]	6277.67	25600	282x2 double	282	1x100 double	1x100 double	10726	2880.48	[33.9581631246954,436.627797568209,174.786714960707]	6830x1 uint16	1	1.0604	1.13132	4.53165	1x100 double	100	TRUE	TRUE	[]	4793.19	1x100 double	0.335227	179	0.685227	1.2924	1.97763	64.26
030321_S043	4466	40x water	108120	[17.5000000000000,532.500000000000,180.500000000000,147,174,51]	108120x3 double	108120x1 uint16	[79.5731711436272,612.036219325426,194.683028849584]	8795.14	65535	9558x2 double	9558	1x100 double	1x100 double	9981	3006.16	[233.921905718039,327.622468321042,179.570162044961]	1444x1 uint16	2	1.00627	35.1923	6.18859	1x100 double	100	TRUE	TRUE	[]	5500.87	1x100 double	0.624306	232	15.8513	6.83687	22.6882	83.34
030321_S043	4466	40x water	57658	[0.500000000000000,63.5000000000000,219.500000000000,209,86,17]	57658x3 double	57658x1 uint16	[106.760214233798,98.2436998820404,229.365835785862]	7452.67	43520	8122x2 double	8122	1x100 double	1x100 double	3407	1455.21	[288.391233223262,1009.60568356655,213.834953995099]	113x1 uint16	25	1.05791	3.32289	5.68819	1x100 double	100	TRUE	TRUE	[]	5306.28	1x100 double	0.400297	233	1.8831	1.55528	3.43839	83.7
030321_S043	4466	40x water	856	[185.500000000000,223.500000000000,200.500000000000,20,11,8]	856x3 double	856x1 uint16	[195.675788795879,228.527044430135,204.270766258854]	9288.97	40960	171x2 double	171	1x100 double	1x100 double	2978	2033.48	[293.298854006586,983.610169045006,196.771644346872]	56x1 uint16	31	1.18113	2.09921	3.37061	1x100 double	100	TRUE	TRUE	[]	6617.08	1x100 double	0.443439	203	0.509703	1.6272	2.1369	72.9
030321_S043	4466	40x water	6830	[0.500000000000000,405.500000000000,171.500000000000,85,51,8]	6830x3 double	6830x1 uint16	[41.0850322760414,435.852273255004,174.786699484512]	8070.93	38400	1650x2 double	1650	1x100 double	1x100 double	2358	1197.09	[61.4322673150053,53.0677763231719,166.994065207905]	67x1 uint16	49	1.44898	2.83143	2.96067	1x100 double	100	TRUE	TRUE	[]	5990.4	1x100 double	0.488992	174	0.299683	0.694948	0.994631	62.46
030321_S043	4466	40x water	2679	[221.500000000000,551.500000000000,189.500000000000,37,43,14]	2679x3 double	2679x1 uint16	[237.451384796700,570.007424867413,195.242899233942]	8108.1	35840	588x2 double	588	1x100 double	1x100 double	1642	1298.06	[136.891232124801,475.487842457509,186.081226828446]	16x1 uint16	85	1.02017	16.0147	5.95881	1x100 double	100	TRUE	TRUE	[]	6147.48	1x100 double	0.476629	230	12.1463	6.47538	18.6217	82.62
030321_S043	4466	40x water	1478	[264.500000000000,599.500000000000,230.500000000000,21,29,7]	1478x3 double	1478x1 uint16	[277.033687943262,609.005614657211,233.545212765957]	5861.33	28160	362x2 double	362	1x100 double	1x100 double	1578	1344.81	[253.154845791580,91.3778194823129,228.689458588577]	21x1 uint16	92	1.44128	1.34249	3.75556	1x100 double	100	TRUE	TRUE	[]	4731.05	1x100 double	0.312407	232	0.452769	1.78	2.23277	83.34
030321_S043	4466	40x water	2214	[68.5000000000000,365.500000000000,168.500000000000,27,27,9]	2214x3 double	2214x1 uint16	[83.4733013240215,381.752364324167,172.672050050924]	7947.1	35840	384x2 double	384	1x100 double	1x100 double	1476	756.214	[158.274770945499,74.1457762664903,166.011397626019]	42x1 uint16	97	1.00264	1.30495	4.96846	1x100 double	100	TRUE	TRUE	[]	6300	1x100 double	0.349206	172	0.74016	2.1014	2.84156	61.74
030321_S043	4466	40x water	3220	[278.500000000000,227.500000000000,279.500000000000,22,34,19]	3220x3 double	3220x1 uint16	[291.631016870454,245.101222720941,289.038074601455]	5136.7	33280	437x2 double	437	1x60 double	1x60 double	1356	865.649	[290.769084267383,997.019700896063,273.721720940398]	37x1 uint16	108	1.19527	2.63146	4.86634	1x60 double	60	TRUE	TRUE	[]	3362.56	1x60 double	0.503484	290	1.56553	5.09276	6.65828	104.22
030321_S043	4466	40x water	1368	[130.500000000000,707.500000000000,177.500000000000,31,22,7]	1368x3 double	1368x1 uint16	[149.951157466294,718.062833884508,180.769524294073]	7356.26	25600	359x2 double	359	1x100 double	1x100 double	1244	729.179	[149.397315962188,615.805162364696,174.835431258265]	28x1 uint16	123	1.15385	1.53017	4.26957	1x100 double	100	TRUE	TRUE	[]	5433.76	1x100 double	0.292651	180	0.827143	3.22125	4.04839	64.62
030321_S043	4466	40x water	1467	[84.5000000000000,9.50000000000000,66.5000000000000,28,10,11]	1467x3 double	1467x1 uint16	[98.0816709692560,13.9148087303450,71.3438160056325]	7435.69	28160	230x2 double	230	1x100 double	1x100 double	1239	582.347	[277.981426318556,954.685053443140,68.3706325565096]	49x1 uint16	125	1.17532	3.32213	4.44199	1x100 double	100	TRUE	TRUE	[]	5398.26	1x100 double	0.397938	73	1.83803	0.265191	2.10322	26.1
030321_S043	4466	40x water	1281	[286.500000000000,776.500000000000,180.500000000000,14,18,10]	1281x3 double	1281x1 uint16	[294.563751317176,784.146469968388,185.198103266596]	3793.04	23040	188x2 double	188	1x100 double	1x100 double	1192	739.114	[141.887471490974,298.713943329854,178.122695117708]	35x1 uint16	132	1.04511	2.45151	4.89928	1x100 double	100	TRUE	TRUE	[]	2628.09	1x100 double	0.455959	185	1.14612	3.72706	4.87318	66.42
030321_S043	4466	40x water	1681	[118.500000000000,495.500000000000,186.500000000000,22,18,11]	1681x3 double	1681x1 uint16	[131.094572933364,504.670254179070,191.699335928555]	6650.52	35840	258x2 double	258	1x100 double	1x100 double	1156	825.444	[262.602840220757,955.691681249159,183.496230986674]	18x1 uint16	136	1.03433	10.4975	5.6805	1x100 double	100	TRUE	TRUE	[]	4951.32	1x100 double	0.533066	215	5.37429	8.26468	13.639	77.22
030321_S043	4466	40x water	1281	[134.500000000000,601.500000000000,182.500000000000,26,14,13]	1281x3 double	1281x1 uint16	[146.354294975689,607.725445705024,189.935494327391]	6165.18	28160	218x2 double	218	1x100 double	1x100 double	1094	688.65	[217.988020039207,1009.90786321063,179.585856385682]	20x1 uint16	145	1.02116	6.52788	4.79275	1x100 double	100	TRUE	TRUE	[]	4838.17	1x100 double	0.429612	208	4.60667	1.73342	6.34009	74.7
030321_S043	4466	40x water	1072	[210.500000000000,577.500000000000,188.500000000000,24,25,10]	1072x3 double	1072x1 uint16	[225.090930618044,589.697134738338,193.571157944589]	10084.8	40960	263x2 double	263	1x100 double	1x100 double	1074	793.5	[194.346355807603,139.294896030246,184.609535811804]	[634;605;620;1074;799;1029]	148	1.00493	13.713	5.46569	1x100 double	100	TRUE	TRUE	[]	7845.48	1x100 double	0.483871	227	10.0433	5.62567	15.6689	81.54
030321_S043	4466	40x water	688	[184.500000000000,668.500000000000,187.500000000000,14,10,11]	688x3 double	688x1 uint16	[190.822026022305,673.547862453532,193.112453531599]	8007.44	30720	103x2 double	103	1x100 double	1x100 double	879	693.25	[270,900.979805265056,183.815362423368]	[512;719;879;663]	172	1.03306	10.5822	2.616	1x100 double	100	TRUE	TRUE	[]	5244.27	1x100 double	0.78673	206	6.36	15.0933	21.4533	73.98
030321_S043	4466	40x water	889	[163.500000000000,14.5000000000000,175.500000000000,24,9,9]	889x3 double	889x1 uint16	[176.206044968669,18.3811279026908,179.731662366384]	7812.46	30720	172x2 double	172	1x100 double	1x100 double	703	621.5	[272.749195494771,86.4859211584875,171.771721641191]	[560;575;649;647;703;654;644;540]	206	1.02372	8.26028	4.84556	1x100 double	100	TRUE	TRUE	[]	6623.26	1x100 double	0.222472	183	0.209647	0.302034	0.511681	65.7
030321_S043	4466	40x water	1761	[110.500000000000,586.500000000000,183.500000000000,20,14,15]	1761x3 double	1761x1 uint16	[121.809910472621,593.115552779513,190.662294399334]	6982.21	33280	204x2 double	204	1x100 double	1x100 double	459	396	[277,627,179.420454545455]	[459;333]	247	1.11236	8.51873	3.12121	1x100 double	100	TRUE	TRUE	[]	4869.02	1x100 double	0.489691	195	1.07345	0.702295	1.77575	70.02
030321_S043	4466	40x water	1873	[219.500000000000,739.500000000000,76.5000000000000,18,26,9]	1873x3 double	1873x1 uint16	[227.309727916511,753.381662318300,81.4131569139023]	7334.2	28160	323x2 double	323	1x100 double	1x100 double	369	270	[292.188888888889,987.609259259259,75.7324074074074]	[289;218;369;204]	265	1.15247	1.16264	4.10506	1x100 double	100	TRUE	TRUE	[]	5413.25	1x100 double	0.408492	81	0.595901	1.6605	2.2564	28.98
030321_S034	4466	40x water	4098	[195.500000000000,800.500000000000,58.5000000000000,42,39,9]	4098x3 double	4098x1 uint16	[211.991274482503,818.930845632600,62.6207184628237]	6729.84	33280	819x2 double	819	1x100 double	1x100 double	9820	1065.61	[8.69377087100830,114.659131262124,78.6238798158572]	6853x1 uint16	2	1.43529	2.03298	2.59508	1x100 double	100	TRUE	TRUE	[]	4860.56	1x100 double	0.450161	61	0.287016	1.02045	1.30747	21.78
030321_S034	4466	40x water	927	[261.500000000000,864.500000000000,35.5000000000000,17,19,7]	927x3 double	927x1 uint16	[268.896736072032,874.600731570062,38.7543612830613]	9814.71	38400	226x2 double	226	1x100 double	1x100 double	4653	1336.34	[10.4821887158698,506.277527506034,41.4638535072877]	697x1 uint16	6	1.04113	2.8985	2.55062	1x100 double	100	TRUE	TRUE	[]	8121.77	1x100 double	0.329149	37	0.203254	0.965714	1.16897	13.14
030321_S034	4466	40x water	2073	[175.500000000000,489.500000000000,125.500000000000,30,17,9]	2073x3 double	2073x1 uint16	[190.754499000222,497.514330148856,129.749833370362]	5558.4	33280	355x2 double	355	1x100 double	1x100 double	1664	415.405	[290.538416281030,634.374307717892,123.305551445922]	2099x1 uint16	29	1.45036	2.36269	2.47245	1x100 double	100	TRUE	TRUE	[]	4059.94	1x100 double	0.536412	128	0.194143	0.944516	1.13866	45.9
030321_S034	4466	40x water	1307	[102.500000000000,419.500000000000,87.5000000000000,24,16,9]	1307x3 double	1307x1 uint16	[112.437697516930,427.997516930023,91.7020316027088]	8676.97	43520	240x2 double	240	1x100 double	1x100 double	1310	435.943	[293.366430724866,1018.46329794206,81.7729060165159]	35x1 uint16	42	1.68613	2.27117	2.80087	1x100 double	100	TRUE	TRUE	[]	5802.67	1x100 double	0.564338	90	0.438182	1.71	2.14818	32.22
030321_S034	4466	40x water	125	[228.500000000000,206.500000000000,19.5000000000000,15,11,2]	125x3 double	125x1 uint16	[235.887005649718,212.209039548023,20.1779661016949]	7249.92	30720	104x2 double	104	1x100 double	1x100 double	810	332.956	[104.743502350864,960.312793129767,25.0286560746683]	1031x1 uint16	61	1	2.37662	2.85657	1x100 double	100	TRUE	TRUE	[]	6449.23	1x100 double	0.39313	15	0.151967	0.319655	0.831622	5.22
030321_S034	4466	40x water	1031	[98.5000000000000,953.500000000000,19.5000000000000,13,14,12]	1031x3 double	1031x1 uint16	[105.152166255724,960.567453328637,25.5315251849243]	7049.31	25600	138x2 double	138	1x100 double	1x100 double	584	264.144	[78.3625520245592,248.497451858323,23.3087923021853]	624x1 uint16	85	1.14286	4.07911	4.75781	1x100 double	100	TRUE	TRUE	[]	4897.39	1x100 double	0.492424	27	0.334286	3.20727	3.54156	9.54
030321_S034	4466	40x water	1609	[23.5000000000000,401.500000000000,116.500000000000,16,14,15]	1609x3 double	1609x1 uint16	[33.5285202535134,408.130614494351,124.399007991182]	5773.92	38400	170x2 double	170	1x100 double	1x100 double	522	223	[6.25050017247327,323.231597102449,111.002828561573]	65x1 uint16	92	1.01932	3.46044	4.91469	1x100 double	100	TRUE	TRUE	[]	3538.82	1x100 double	0.565957	128	3.14471	2.20909	5.3538	45.9
030321_S034	4466	40x water	1140	[236.500000000000,830.500000000000,58.5000000000000,21,16,8]	1140x3 double	1140x1 uint16	[246.948691099476,838.808376963351,62.4193717277487]	4289.12	23040	224x2 double	224	1x100 double	1x100 double	452	199.641	[9.68083740046237,572.211790393013,57.7675956845620]	78x1 uint16	100	1.36571	2.67623	2.89958	1x100 double	100	TRUE	TRUE	[]	3131.43	1x100 double	0.445255	61	0.2928	1.11429	1.40709	21.78
030321_S034	4466	40x water	413	[115.500000000000,260.500000000000,134.500000000000,10,10,8]	413x3 double	413x1 uint16	[120.437120555074,265.719861231570,139.015611448396]	7146.92	28160	76x2 double	76	1x100 double	1x100 double	321	200.043	[284.655074983699,787.161703977396,126.164529450120]	23x1 uint16	129	1.25424	2.97904	4.51351	1x100 double	100	TRUE	TRUE	[]	5153.68	1x100 double	0.431373	140	0.99	0.586667	1.57667	50.22
030321_S034	4466	40x water	16167	[228.500000000000,611.500000000000,26.5000000000000,50,56,18]	16167x3 double	16167x1 uint16	[258.868011039057,641.022060487621,35.9879098113072]	9545.33	65535	1375x2 double	1375	1x100 double	1x100 double	218	122.794	[12.4838323353293,627.453652694611,27.9156886227545]	34x1 uint16	151	1.00062	5.21692	6.55917	1x100 double	100	TRUE	TRUE	[]	4868.65	1x100 double	0.95151	37	2.16567	10.6646	12.8302	13.14
030321_S034	4466	40x water	874	[203.500000000000,732.500000000000,19.5000000000000,15,17,7]	874x3 double	874x1 uint16	[211.944696657037,740.633924886504,22.2843582335947]	7097.12	35840	178x2 double	178	1x100 double	1x100 double	178	118.167	[80.8509637987776,311.251998119417,21.2943112364833]	18x1 uint16	162	1.2	3.09478	4.59848	1x100 double	100	TRUE	TRUE	[]	5062.47	1x100 double	0.423295	22	0.948857	1.16143	2.11029	7.74
030321_S034	4466	40x water	1553	[109.500000000000,458.500000000000,110.500000000000,19,16,9]	1553x3 double	1553x1 uint16	[118.991760828625,465.954566854991,114.639124293785]	7002.5	28160	238x2 double	238	1x100 double	1x100 double	173	94.1667	[15.1415929203540,57.8743362831858,103.870796460177]	12x1 uint16	165	1.49438	2.29594	2.5188	1x100 double	100	TRUE	TRUE	[]	4657.48	1x100 double	0.586605	112	0.238125	3.21143	3.44955	40.14
030321_S034	4466	40x water	1507	[38.5000000000000,396.500000000000,201.500000000000,19,20,10]	1507x3 double	1507x1 uint16	[48.7974952741021,406.481568998110,206.343336483932]	7189.06	30720	275x2 double	275	1x100 double	1x100 double	163	99	[25.8367003367003,855.877104377104,186.373176206510]	18x1 uint16	169	1.09524	3.05249	2.65217	1x100 double	100	TRUE	TRUE	[]	4998.98	1x100 double	0.391061	204	0.186207	2.16	2.34621	73.26
030321_S034	4466	40x water	1303	[96.5000000000000,953.500000000000,301.500000000000,19,15,9]	1303x3 double	1303x1 uint16	[105.486260716641,960.721037590679,306.199824137173]	8937.41	43520	220x2 double	220	1x43 double	1x43 double	161	114.25	[5.64770240700219,805.915754923414,277.806345733042]	[81;96;90;128;104;132;161;122]	170	1.00654	4.98735	2.91558	1x43 double	43	TRUE	TRUE	[]	6155.64	1x43 double	0.444234	306	1.02738	1.2696	2.29698	109.98
030321_S034	4466	40x water	13997	[211.500000000000,777.500000000000,123.500000000000,52,56,17]	13997x3 double	13997x1 uint16	[232.626475338595,808.447015033387,133.354810868863]	6587.16	65535	1338x2 double	1338	1x100 double	1x100 double	124	90.3913	[66.0024050024050,314.826358826359,115.697931697932]	23x1 uint16	187	1.07047	4.94494	6.22747	1x100 double	100	TRUE	TRUE	[]	3679.28	1x100 double	0.76079	134	1.90573	10.3913	12.297	48.06
032421_S005	4430	40x water	1847	[113.500000000000,477.500000000000,312.500000000000,28,22,12]	1847x3 double	1847x1 uint16	[128.860799281545,486.702739110912,318.693309384823]	6173.38	30720	297x2 double	297	1x30 double	1x30 double	5904	2266.65	[6.45594920683636,119.172111074879,300.068229336505]	69x1 uint16	42	1.08368	3.43101	4.17375	1x30 double	30	TRUE	TRUE	[]	4602.83	1x30 double	0.337079	320	1.96364	2.37789	4.34153	115.02
032421_S005	4430	40x water	2190	[210.500000000000,558.500000000000,56.5000000000000,39,33,12]	2190x3 double	2190x1 uint16	[233.828324697755,577.758721934370,63.3172711571675]	6768.22	35840	472x2 double	472	1x100 double	1x100 double	4271	2409.71	[288.445669045207,965.103164679759,55.1158460344493]	77x1 uint16	64	1.05921	5.31418	5.45342	1x100 double	100	TRUE	TRUE	[]	5271.86	1x100 double	0.26749	64	1.25053	2.13429	3.38481	22.86
032421_S005	4430	40x water	6168	[55.5000000000000,591.500000000000,57.5000000000000,51,55,12]	6168x3 double	6168x1 uint16	[80.1646407056799,622.353001290878,63.1419427710843]	7716.52	40960	1335x2 double	1335	1x100 double	1x100 double	4115	2369.03	[9.37873715466799,65.7509621262845,57.1063608046345]	145x1 uint16	71	1.04487	2.5507	5.27085	1x100 double	100	TRUE	TRUE	[]	5702.95	1x100 double	0.301278	63	1.07498	9.91286	10.9878	22.5
032421_S005	4430	40x water	49264	[17.5000000000000,745.500000000000,224.500000000000,133,66,16]	49264x3 double	49264x1 uint16	[65.3176401498423,771.446892178160,232.584209180744]	8252.24	65535	4934x2 double	4934	1x100 double	1x100 double	3749	1825.07	[15.3962871521244,144.397745025456,213.827589355894]	168x1 uint16	80	1.04692	7.5381	6.20011	1x100 double	100	TRUE	TRUE	[]	5181.74	1x100 double	0.572764	233	1.94872	16.0599	18.0086	83.7
032421_S005	4430	40x water	25249	[21.5000000000000,454.500000000000,310.500000000000,68,105,16]	25249x3 double	25249x1 uint16	[46.9415656416322,502.355521880544,319.862334910309]	8229.64	61440	2845x2 double	2845	1x29 double	1x29 double	3614	1714.58	[10.1401788582151,20.5227080621439,298.747848798878]	138x1 uint16	84	1.01649	7.87254	3.76673	1x29 double	29	TRUE	TRUE	[]	5180.29	1x29 double	0.540559	323	2.70146	2.47311	5.17457	116.1
032421_S005	4430	40x water	2483	[17.5000000000000,410.500000000000,221.500000000000,18,16,16]	2483x3 double	2483x1 uint16	[27.1724375820226,418.429935425142,230.020561799879]	8724.62	65535	235x2 double	235	1x100 double	1x100 double	2873	1477.39	[292.352079207921,821.859117911791,210.689288928893]	94x1 uint16	104	1.02331	7.89144	3.5767	1x100 double	100	TRUE	TRUE	[]	5228.94	1x100 double	0.632499	237	4.40509	13.921	18.3261	85.14
032421_S005	4430	40x water	12938	[25.5000000000000,350.500000000000,315.500000000000,90,59,14]	12938x3 double	12938x1 uint16	[57.7843355806873,378.417301000435,322.371329926055]	7278.33	40960	1757x2 double	1757	1x27 double	1x27 double	2466	1223.36	[286.544506362543,839.255295569406,301.744413616393]	104x1 uint16	119	1.00816	21.8485	0.894737	1x27 double	27	TRUE	TRUE	[]	5373.52	1x27 double	0.364967	326	2.98189	[]	[]	117.18
032421_S005	4430	40x water	981	[213.500000000000,537.500000000000,60.5000000000000,28,20,11]	981x3 double	981x1 uint16	[227.481679703582,548.056813503499,64.0300535199671]	6338.67	28160	269x2 double	269	1x100 double	1x100 double	2227	1896.5	[7,22,59.5871341945689]	[1566;2227]	135	1.2	5.46127	4.12698	1x100 double	100	TRUE	TRUE	[]	5043.87	1x100 double	0.415094	76	5.39265	6.655	12.0477	27.18
032421_S005	4430	40x water	773	[249.500000000000,622.500000000000,56.5000000000000,14,12,9]	773x3 double	773x1 uint16	[257.561423650976,629.504018369690,61.3585916570991]	8653.66	43520	132x2 double	132	1x100 double	1x100 double	2192	1644.28	[295.074804777775,773.309509329311,55.0676770379741]	25x1 uint16	136	1.03653	2.96142	5.64317	1x100 double	100	TRUE	TRUE	[]	6031.52	1x100 double	0.466238	62	1.2375	1.4508	2.6883	22.14
032421_S005	4430	40x water	1528	[69.5000000000000,595.500000000000,317.500000000000,23,15,11]	1528x3 double	1528x1 uint16	[80.1702199661591,603.506260575296,323.225380710660]	9901.57	30720	246x2 double	246	1x26 double	1x26 double	1803	692.487	[266.458819318448,882.005220868664,304.458128139618]	117x1 uint16	163	1.2069	6.82429	1.8	1x26 double	26	TRUE	TRUE	[]	7076.42	1x26 double	0.389706	330	2.77347	[]	[]	118.62
032421_S005	4430	40x water	28220	[110.500000000000,553.500000000000,52.5000000000000,110,90,17]	28220x3 double	28220x1 uint16	[161.445562777392,608.709429755369,61.9399045034812]	8625.44	61440	4493x2 double	4493	1x100 double	1x100 double	1432	1326.17	[273.674751790876,504.497926354154,51.6791504335805]	[1296;1257;1315;1273;1384;1432]	197	1.11452	1.85073	5.54327	1x100 double	100	TRUE	TRUE	[]	6130.78	1x100 double	0.392193	63	1.61979	6.04889	7.66868	22.5
032421_S005	4430	40x water	1633	[242.500000000000,464.500000000000,201.500000000000,22,15,13]	1633x3 double	1633x1 uint16	[254.025945608003,471.277586745858,206.228821506721]	5014.97	23040	220x2 double	220	1x100 double	1x100 double	1343	1343	[282,761,191]	1343	209	1.06857	9.69865	1.29947	1x100 double	100	TRUE	TRUE	[]	3665.45	1x100 double	0.444444	203	0.227027	1.04211	1.26913	72.9
032421_S005	4430	40x water	646	[212.500000000000,164.500000000000,226.500000000000,19,9,8]	646x3 double	646x1 uint16	[221.230808080808,168.400505050505,230.219696969697]	7846.44	33280	129x2 double	129	1x100 double	1x100 double	1316	1143.5	[29.8229121119370,552.343973181752,213.853519895059]	[1005;1086;1223;1316;1137;1094]	211	1.01136	4.51614	3.42697	1x100 double	100	TRUE	TRUE	[]	5715.35	1x100 double	0.371528	228	0.337895	1.71191	2.04981	81.9
032421_S005	4430	40x water	2524	[28.5000000000000,426.500000000000,314.500000000000,30,25,11]	2524x3 double	2524x1 uint16	[44.3252527871403,436.970184080892,320.216100596318]	7824.03	33280	390x2 double	390	1x29 double	1x29 double	1219	708.548	[154.085721966464,24.3581437548305,300.641553815652]	42x1 uint16	225	1.2549	6.00243	1.99479	1x29 double	29	TRUE	TRUE	[]	5743.59	1x29 double	0.4	324	2.61818	1.76516	4.38334	116.46
032421_S005	4430	40x water	769	[258.500000000000,679.500000000000,77.5000000000000,20,10,10]	769x3 double	769x1 uint16	[266.958078191239,683.001413094677,83.0386245878474]	7067.46	30720	142x2 double	142	1x100 double	1x100 double	1034	775.385	[289.873115079365,6.80128968253968,75.4541666666667]	13x1 uint16	258	1.01786	5.86887	5.40351	1x100 double	100	TRUE	TRUE	[]	5534.65	1x100 double	0.34202	88	2.44125	2.03143	4.47268	31.5
032421_S005	4430	40x water	992	[150.500000000000,510.500000000000,312.500000000000,14,16,10]	992x3 double	992x1 uint16	[157.757739938081,518.422600619195,317.829721362229]	6668.39	28160	155x2 double	155	1x31 double	1x31 double	836	652.333	[6.65278487480838,1014.51814001022,298.155850792029]	[777;582;836;772;337;610]	285	1.06849	4.13557	2.62821	1x31 double	31	TRUE	TRUE	[]	5219.1	1x31 double	0.313291	318	1.14197	2.11655	3.25852	114.3
032421_S007	4430	40x water	1270	[99.5000000000000,238.500000000000,91.5000000000000,11,28,9]	1270x3 double	1270x1 uint16	[105.428571428571,250.582668600435,96.4267585206672]	5559.43	25600	237x2 double	237	1x100 double	1x100 double	10170	2712.36	[7.55607110079149,903.937771118833,87.1724962935653]	282x1 uint16	15	1.35227	3.48633	3.85714	1x100 double	100	TRUE	TRUE	[]	3921.01	1x100 double	0.473829	97	1.18857	0.868966	2.05754	34.74
032421_S007	4430	40x water	145571	[153.500000000000,29.5000000000000,290.500000000000,147,189,23]	145571x3 double	145571x1 uint16	[251.893661076109,103.832972461325,303.696530304375]	5945.27	53760	16364x2 double	16364	1x45 double	1x45 double	2980	1266.7	[13.1924918115394,159.890115058369,269.426060300664]	94x1 uint16	92	1.07418	6.11845	3.42587	1x45 double	45	TRUE	TRUE	[]	3613.32	1x45 double	0.719487	304	1.34463	5.84471	7.18933	109.26
032421_S007	4430	40x water	73161	[170.500000000000,229.500000000000,136.500000000000,129,150,21]	73161x3 double	73161x1 uint16	[252.127999672670,309.086271915767,148.574730123226]	5131.16	43520	10572x2 double	10572	1x100 double	1x100 double	2675	1181.37	[28.8965643153527,810.371253112033,127.909643153527]	51x1 uint16	99	1.05236	3.74582	5.92847	1x100 double	100	TRUE	FALSE	[]	3668.56	1x100 double	0.419472	150	2.01891	7.92217	9.94108	53.82
032421_S007	4430	40x water	398	[163.500000000000,281.500000000000,147.500000000000,10,13,8]	398x3 double	398x1 uint16	[168.278911564626,288.005102040816,151.465986394558]	7564.22	23040	83x2 double	83	1x100 double	1x100 double	2256	1101.41	[6.19965221673361,322.046135143037,136.094886354893]	59x1 uint16	114	1.21569	4.48827	4.12903	1x100 double	100	TRUE	TRUE	[]	5983.61	1x100 double	0.407216	155	1.3365	1.11	2.4465	55.62
032421_S007	4430	40x water	13752	[0.500000000000000,407.500000000000,154.500000000000,46,78,19]	13752x3 double	13752x1 uint16	[13.9247224402826,459.575557923068,162.365145228216]	6639.77	53760	1589x2 double	1589	1x100 double	1x100 double	1837	1161.67	[293.873888091822,797.018220946915,141.780774748924]	[558;970;879;1460;1837;1266]	135	1.02105	7.44591	5.95438	1x100 double	100	TRUE	FALSE	[]	4105.02	1x100 double	0.591052	180	7.64746	10.0232	17.6706	64.62
032421_S007	4430	40x water	1342	[146.500000000000,296.500000000000,146.500000000000,21,16,10]	1342x3 double	1342x1 uint16	[156.276380781320,305.096317916480,151.336326897171]	8496.45	30720	249x2 double	249	1x100 double	1x100 double	1589	768.231	[292.191448883549,989.038550115150,133.664764193451]	13x1 uint16	145	1.07971	4.00212	4.32886	1x100 double	100	TRUE	TRUE	[]	5623.78	1x100 double	0.469835	154	2.46706	5.70553	8.17259	55.26
032421_S007	4430	40x water	5398	[10.5000000000000,179.500000000000,300.500000000000,47,38,13]	5398x3 double	5398x1 uint16	[37.6715899919290,196.153591606134,307.161662631154]	5875.95	30720	895x2 double	895	1x42 double	1x42 double	1257	579.462	[283.048453471393,294.906411788132,275.777445904686]	26x1 uint16	169	1.28772	32.1827	0.0790191	1x42 double	42	TRUE	TRUE	[]	4015.91	1x42 double	0.393162	309	2.16993	7.33553	9.50546	111.06
032421_S007	4430	40x water	492	[180.500000000000,439.500000000000,152.500000000000,15,8,11]	492x3 double	492x1 uint16	[189.496482412060,444.154773869347,158.735678391960]	5177.24	25600	85x2 double	85	1x100 double	1x100 double	705	485.167	[278.329611817245,339.513740982480,139.592064582618]	12x1 uint16	215	1.22472	3.95786	4.52294	1x100 double	100	TRUE	TRUE	[]	3734.59	1x100 double	0.443548	160	0.675	1.04143	1.71643	57.42
032421_S007	4430	40x water	40020	[3.50000000000000,3.50000000000000,223.500000000000,118,67,18]	40020x3 double	40020x1 uint16	[65.4776722379106,39.4528516031401,233.339233357204]	4734.34	51200	4420x2 double	4420	1x100 double	1x100 double	649	649	[65,917,202]	649	221	1.1434	1.97729	5.47676	1x100 double	100	TRUE	FALSE	[]	2970.06	1x100 double	0.74727	234	1.55622	3.25612	4.81234	84.06
032421_S007	4430	40x water	16494	[4.50000000000000,42.5000000000000,296.500000000000,122,55,18]	16494x3 double	16494x1 uint16	[75.8359377044889,73.2046852506217,305.834262531082]	5929.72	33280	2491x2 double	2491	1x43 double	1x43 double	161	131.5	[110,918.387832699620,273]	[161;102]	260	1.00312	102.029	-1.2764	1x43 double	43	TRUE	TRUE	[]	4069.69	1x43 double	0.39596	305	1.14912	[]	[]	109.62
032421_S019	4430	40x water	2299	[188.500000000000,888.500000000000,72.5000000000000,28,17,11]	2299x3 double	2299x1 uint16	[201.970625394820,896.594440934934,77.7075173720783]	3525.43	25600	320x2 double	320	1x100 double	1x100 double	14270	4274.72	[292.216934116788,886.471973505353,71.1330096138342]	280x1 uint16	23	1.03934	1.67318	4.26183	1x100 double	100	TRUE	TRUE	[]	2152	1x100 double	0.66171	75	0.367912	5.552	5.91991	26.82
032421_S019	4430	40x water	22448	[72.5000000000000,687.500000000000,230.500000000000,83,82,13]	22448x3 double	22448x1 uint16	[114.612890695034,727.494232952848,236.192195063647]	3816.51	28160	3614x2 double	3614	1x100 double	1x100 double	9444	2059.42	[291.325490061238,563.745080937469,213.405458058608]	579x1 uint16	43	1.0863	0.556588	4.57483	1x100 double	100	TRUE	TRUE	[]	2479.96	1x100 double	0.580691	235	0.755758	3.88187	4.63763	84.42
032421_S019	4430	40x water	754	[113.500000000000,429.500000000000,87.5000000000000,27,21,7]	754x3 double	754x1 uint16	[129.846601941748,439.110679611651,90.7339805825243]	5245.62	23040	225x2 double	225	1x100 double	1x100 double	7986	2848.97	[292.723786434514,264.634319885665,85.2520575564820]	516x1 uint16	47	1.03448	1.68767	4.425	1x100 double	100	TRUE	TRUE	[]	4175.64	1x100 double	0.299728	89	0.650526	2.00432	2.65485	31.86
032421_S019	4430	40x water	2247	[177.500000000000,428.500000000000,223.500000000000,26,16,11]	2247x3 double	2247x1 uint16	[190.120597652081,436.111259338314,228.734791889007]	4270.08	23040	325x2 double	325	1x100 double	1x100 double	7213	2463.09	[7.34915473246370,503.629755056868,206.593016514972]	208x1 uint16	56	1.00613	2.33211	5.93902	1x100 double	100	TRUE	TRUE	[]	2780.55	1x100 double	0.481586	228	1.18825	3.10154	4.28979	81.9
032421_S019	4430	40x water	8037	[5.50000000000000,100.500000000000,143.500000000000,57,55,15]	8037x3 double	8037x1 uint16	[34.4120629370629,132.361888111888,150.026311188811]	3643.95	25600	1555x2 double	1555	1x100 double	1x100 double	7010	2516.53	[294.179916045922,800.894009782601,131.773887536215]	55x1 uint16	59	1.00968	1.89923	6.41515	1x100 double	100	TRUE	TRUE	[]	2642.32	1x100 double	0.383178	150	1.25287	4.09024	5.34311	53.82
032421_S019	4430	40x water	1801	[263.500000000000,94.5000000000000,223.500000000000,33,24,11]	1801x3 double	1801x1 uint16	[277.793302540416,102.662432640493,227.964588144727]	3692.88	25600	385x2 double	385	1x100 double	1x100 double	5588	1436.55	[7.72369367978374,515.204227434622,209.121555101368]	266x1 uint16	80	1.01538	1.88951	3.34091	1x100 double	100	TRUE	TRUE	[]	2380.47	1x100 double	0.446927	226	0.303158	3.35077	3.65393	81.18
032421_S019	4430	40x water	5470	[92.5000000000000,575.500000000000,290.500000000000,62,31,12]	5470x3 double	5470x1 uint16	[124.906831137277,586.902999719652,296.869451453135]	5008.15	28160	854x2 double	854	1x52 double	1x52 double	4454	1690.82	[7.71327694172470,232.398512977327,260.869105609156]	182x1 uint16	100	1.01594	3.37532	4.77516	1x52 double	52	TRUE	TRUE	[]	3015.64	1x52 double	0.576541	294	0.509727	7.59767	8.1074	105.66
032421_S019	4430	40x water	3123	[132.500000000000,893.500000000000,211.500000000000,34,45,10]	3123x3 double	3123x1 uint16	[145.122948539638,908.201668984701,216.215577190542]	2946.91	17920	584x2 double	584	1x100 double	1x100 double	4092	1535.95	[254.087538101861,695.979706134770,194.364697700571]	88x1 uint16	110	1.15534	1.14672	3.2395	1x100 double	100	TRUE	TRUE	[]	1898.08	1x100 double	0.621247	214	0.273559	1.884	2.15756	76.86
032421_S019	4430	40x water	1450	[164.500000000000,66.5000000000000,59.5000000000000,30,15,9]	1450x3 double	1450x1 uint16	[180.192736077482,73.7418886198547,63.5995157384988]	3645.79	20480	294x2 double	294	1x100 double	1x100 double	3913	1615.55	[18.9458436094589,402.783732288795,57.7389815755114]	128x1 uint16	119	1.12264	1.96671	4.38655	1x100 double	100	TRUE	TRUE	[]	2368.44	1x100 double	0.595588	63	0.940235	2.448	3.38824	22.5
032421_S019	4430	40x water	698	[42.5000000000000,737.500000000000,257.500000000000,28,11,7]	698x3 double	698x1 uint16	[57.4148329258354,743.641401792991,260.692746536267]	4500.17	17920	186x2 double	186	1x88 double	1x88 double	3685	1540.43	[9.93724471892764,698.423289353639,235.049610498982]	185x1 uint16	122	1.16049	1.98159	5.29787	1x88 double	88	TRUE	FALSE	[]	2780.22	1x88 double	0.633663	261	1.36	3.08727	4.44727	93.78
032421_S019	4430	40x water	1803	[129.500000000000,209.500000000000,170.500000000000,36,27,9]	1803x3 double	1803x1 uint16	[146.754909365559,216.595543806647,175.112915407855]	3759.78	25600	433x2 double	433	1x100 double	1x100 double	3532	1406.22	[293.518591968270,122.389547432681,157.097764957458]	142x1 uint16	131	1.03546	3.13327	5.95205	1x100 double	100	TRUE	TRUE	[]	2583.65	1x100 double	0.418764	176	1.40437	2.41286	3.81723	63.18
032421_S019	4430	40x water	856	[168.500000000000,393.500000000000,102.500000000000,18,15,7]	856x3 double	856x1 uint16	[178.302473050095,401.304375396322,105.976537729867]	4716.26	20480	183x2 double	183	1x100 double	1x100 double	3234	1395.28	[18.5835158891143,6.49248140635565,96.0911426639621]	53x1 uint16	148	1.06667	1.46186	3.4375	1x100 double	100	TRUE	TRUE	[]	3049.62	1x100 double	0.555046	104	0.410943	2.49	2.90094	37.26
032421_S019	4430	40x water	1557	[115.500000000000,894.500000000000,70.5000000000000,18,14,14]	1557x3 double	1557x1 uint16	[124.400623538581,901.810210444271,76.8975058456742]	4218.99	28160	180x2 double	180	1x100 double	1x100 double	2918	1185.87	[292.804608019150,804.840487459877,67.2037701974865]	31x1 uint16	156	1.03261	8.48074	5.47368	1x100 double	100	TRUE	FALSE	[]	2759.11	1x100 double	0.474227	84	2.1096	2.235	4.3446	30.06
032421_S019	4430	40x water	982	[234.500000000000,134.500000000000,253.500000000000,17,11,11]	982x3 double	982x1 uint16	[242.107279693487,139.135632183908,258.941762452107]	3402.04	23040	136x2 double	136	1x90 double	1x90 double	2498	1073.62	[281.199041963974,987.555910383713,230.062239076560]	56x1 uint16	178	1.01923	5.36471	5.01887	1x90 double	90	TRUE	TRUE	[]	1543.53	1x90 double	1.20732	261	2.685	8.76545	11.4505	93.78
032421_S019	4430	40x water	1209	[117.500000000000,797.500000000000,236.500000000000,25,15,9]	1209x3 double	1209x1 uint16	[130.196500672948,805.422611036339,240.406460296097]	3146.53	17920	250x2 double	250	1x100 double	1x100 double	2472	1003.88	[78.1390589056852,179.272767417023,215.805927538613]	97x1 uint16	180	1.14054	1.59671	4.27014	1x100 double	100	TRUE	TRUE	[]	2119.68	1x100 double	0.565217	239	0.44069	2.86851	3.3092	85.86
032421_S019	4430	40x water	2484	[80.5000000000000,269.500000000000,37.5000000000000,41,18,11]	2484x3 double	2484x1 uint16	[102.662963785825,277.124638969118,43.1488558098200]	4638.71	23040	457x2 double	457	1x100 double	1x100 double	2325	1234.24	[293.950338385283,534.748355733486,36.0761128586407]	17x1 uint16	192	1.10559	5.43165	3.29213	1x100 double	100	TRUE	TRUE	[]	2873.7	1x100 double	0.547758	41	0.438333	9.02432	9.46266	14.58
032421_S019	4430	40x water	1517	[6.50000000000000,833.500000000000,197.500000000000,23,31,9]	1517x3 double	1517x1 uint16	[18.6055882352941,848.981764705882,202.065294117647]	5737.64	23040	406x2 double	406	1x100 double	1x100 double	2176	1222.93	[228.544734536534,1006.81920448572,180.654003854915]	70x1 uint16	203	1.0199	4.60208	5.54146	1x100 double	100	TRUE	TRUE	[]	4451.63	1x100 double	0.304533	204	2.17366	3.47	5.64366	73.26
032421_S019	4430	40x water	353	[31.5000000000000,520.500000000000,273.500000000000,10,15,5]	353x3 double	353x1 uint16	[36.3019271948608,528.402569593148,276.111349036403]	3386.74	15360	107x2 double	107	1x73 double	1x73 double	1781	804.143	[16.4366894652691,327.393986498490,247.639256528691]	56x1 uint16	242	1.02	3.49431	5.62745	1x73 double	73	TRUE	TRUE	[]	2416.45	1x73 double	0.475248	276	1.19077	1.8	2.99077	99.18
032421_S019	4430	40x water	882	[117.500000000000,307.500000000000,252.500000000000,21,10,9]	882x3 double	882x1 uint16	[127.034595300261,312.451044386423,257.086161879896]	4446.62	28160	158x2 double	158	1x92 double	1x92 double	1628	646.21	[266.004542618245,513.268888056908,227.950580307001]	62x1 uint16	251	1	2.0496	3.86364	1x92 double	92	TRUE	TRUE	[]	2884.05	1x92 double	0.595506	255	0.328966	4.32	4.64897	91.62
032421_S019	4430	40x water	2397	[119.500000000000,363.500000000000,87.5000000000000,27,50,7]	2397x3 double	2397x1 uint16	[134.951770584402,395.345426895503,90.5624592656963]	4916.01	23040	648x2 double	648	1x100 double	1x100 double	1455	656.276	[286.371479613283,469.644808743169,81.2234131988230]	29x1 uint16	268	1.13312	0.631032	4.5616	1x100 double	100	TRUE	TRUE	[]	3539.75	1x100 double	0.362723	89	0.680571	2.18903	2.8696	31.86
032421_S019	4430	40x water	1507	[46.5000000000000,292.500000000000,70.5000000000000,38,14,10]	1507x3 double	1507x1 uint16	[65.2960865087539,298.747682801236,75.0288362512873]	3298.95	23040	274x2 double	274	1x100 double	1x100 double	1408	784.562	[284.064606070262,944.500517804509,66.4690512228153]	16x1 uint16	275	1.01242	3.8957	4.19018	1x100 double	100	TRUE	TRUE	[]	2223.65	1x100 double	0.516807	75	0.687692	3.46186	4.14955	26.82
032421_S019	4430	40x water	1068	[254.500000000000,130.500000000000,69.5000000000000,31,10,10]	1068x3 double	1068x1 uint16	[273.329432416618,135.588648332358,74.5874780573435]	4096.48	28160	186x2 double	186	1x100 double	1x100 double	1169	605.176	[96.6262639909377,243.692142211322,67.6527545389356]	159x1 uint16	294	1.30126	3.08831	5.07074	1x100 double	100	TRUE	TRUE	[]	2670.11	1x100 double	0.768041	77	1.71391	0.999	2.71291	27.54
032421_S019	4430	40x water	10550	[209.500000000000,500.500000000000,289.500000000000,58,70,11]	10550x3 double	10550x1 uint16	[239.602174898052,542.544177616674,294.863797009515]	2677.69	20480	1964x2 double	1964	1x54 double	1x54 double	1059	707.889	[293.001883534767,160.012242975985,259.830324909747]	27x1 uint16	309	1.16774	2.12509	3.59448	1x54 double	54	TRUE	TRUE	[]	1820.94	1x54 double	0.456693	293	0.560526	3.59723	4.15776	105.3
032421_S019	4430	40x water	30222	[4.50000000000000,483.500000000000,271.500000000000,146,132,11]	30222x3 double	30222x1 uint16	[72.5417909078398,541.056860406441,276.196775081426]	3693.03	30720	6546x2 double	6546	1x73 double	1x73 double	988	620.5	[235.142281570162,805.863359042247,244.431679521124]	14x1 uint16	319	1.02291	0.938897	5.43834	1x73 double	73	TRUE	TRUE	[]	2493.13	1x73 double	0.539294	276	0.96848	1.84276	2.81124	99.18
032421_S019	4430	40x water	2397	[180.500000000000,94.5000000000000,152.500000000000,42,22,9]	2397x3 double	2397x1 uint16	[201.378315359953,107.004080443020,156.606528708831]	3664.31	23040	438x2 double	438	1x100 double	1x100 double	979	495.933	[293.605995429493,65.6812743648340,139.204597392123]	15x1 uint16	321	1.14847	4.74126	5.04563	1x100 double	100	TRUE	TRUE	[]	2285.3	1x100 double	0.588235	157	1.41283	6.61585	8.02868	56.34
032421_S019	4430	40x water	318	[23.5000000000000,864.500000000000,154.500000000000,10,9,7]	318x3 double	318x1 uint16	[27.8180180180180,868.742342342342,158.072072072072]	4467.92	17920	69x2 double	69	1x100 double	1x100 double	758	405.111	[285.252605595173,31.4459681843116,140.933351618212]	18x1 uint16	357	1.06818	6.11206	5.19149	1x100 double	100	TRUE	TRUE	[]	2856.81	1x100 double	0.688312	171	1.98	3.78	5.76	61.38
032421_S019	4430	40x water	1847	[194.500000000000,180.500000000000,85.5000000000000,19,13,14]	1847x3 double	1847x1 uint16	[204.685784514543,186.185989348628,92.8910282671037]	3383.3	25600	175x2 double	175	1x100 double	1x100 double	712	518.2	[289.101505210344,716.119258973369,79.5314550366654]	[595;619;356;712;309]	370	1.51497	3.94697	4.04348	1x100 double	100	TRUE	TRUE	[]	1872.46	1x100 double	1.21094	97	1.55	3.5175	5.0675	34.74
032421_S019	4430	40x water	16138	[3.50000000000000,199.500000000000,34.5000000000000,66,94,22]	16138x3 double	16138x1 uint16	[34.9209658205810,228.870154861175,47.7444790616696]	3462.3	33280	2957x2 double	2957	1x100 double	1x100 double	614	614	[237,169,33]	614	381	1.17118	0.423383	3.92524	1x100 double	100	TRUE	TRUE	[]	2130.59	1x100 double	0.662332	46	0.4331	2.9038	3.3369	16.38
032421_S019	4430	40x water	2710	[65.5000000000000,914.500000000000,129.500000000000,37,43,11]	2710x3 double	2710x1 uint16	[88.6894712430427,936.698979591837,134.850649350649]	4073.33	23040	576x2 double	576	1x100 double	1x100 double	592	333	[288.369369369369,12.6096096096096,119]	[313;284;592;254;313;242]	385	1.15347	4.35605	3.67382	1x100 double	100	TRUE	TRUE	[]	2835.56	1x100 double	0.410658	133	0.481326	2.28759	2.76892	47.7
032421_S019	4430	40x water	2275	[47.5000000000000,211.500000000000,184.500000000000,26,14,13]	2275x3 double	2275x1 uint16	[60.3372594082160,218.523700086182,191.501005458202]	3917.08	25600	276x2 double	276	1x100 double	1x100 double	591	543.75	[39.4556321839080,588.513333333333,164]	[541;581;558;591;512;542;506;519]	386	1.03425	1.4546	4.65563	1x100 double	100	TRUE	TRUE	[]	2263.19	1x100 double	0.77459	189	0.612353	4.21472	4.82707	67.86
032421_S019	4430	40x water	5910	[257.500000000000,847.500000000000,275.500000000000,38,48,22]	5910x3 double	5910x1 uint16	[276.763332482776,866.592498086247,289.744705281960]	3395.14	30720	1063x2 double	1063	1x59 double	1x59 double	588	342.5	[165.666909975669,521.149391727494,247.557907542579]	12x1 uint16	387	1.27027	1.95244	3.69149	1x59 double	59	TRUE	TRUE	[]	2114.47	1x59 double	0.607062	288	0.545279	2.5063	3.05158	103.5
032421_S019	4430	40x water	3508	[89.5000000000000,806.500000000000,171.500000000000,40,23,11]	3508x3 double	3508x1 uint16	[111.151361052946,819.578522285372,177.320370924319]	2439.59	17920	568x2 double	568	1x100 double	1x100 double	559	516.5	[293,776.541142303969,154]	[474;559]	388	1.22508	0.8421	3.57743	1x100 double	100	TRUE	TRUE	[]	1541.41	1x100 double	0.616959	175	0.518978	3.12612	3.6451	62.82
032421_S019	4430	40x water	32635	[215.500000000000,603.500000000000,256.500000000000,81,117,23]	32635x3 double	32635x1 uint16	[268.418114904927,643.496232146508,267.750503840874]	5371.33	58880	4446x2 double	4446	1x81 double	1x81 double	537	283.133	[223.108311749470,857.542265128326,232.334118201083]	15x1 uint16	394	1.02605	1.3332	5.5204	1x81 double	81	TRUE	TRUE	[]	2596.85	1x81 double	0.847672	267	0.953565	6.07699	7.03056	95.94
032421_S019	4430	40x water	3812	[0.500000000000000,918.500000000000,282.500000000000,24,27,13]	3812x3 double	3812x1 uint16	[9.57671164417791,931.782608695652,288.229885057471]	2687.6	20480	472x2 double	472	1x61 double	1x61 double	459	417	[217,972.449640287770,252]	[459;375]	414	1.25316	12.1183	3.79798	1x61 double	61	TRUE	TRUE	[]	1567.46	1x61 double	0.83737	290	2.28774	10.32	12.6077	104.22
032421_S019	4430	40x water	775	[126.500000000000,526.500000000000,132.500000000000,23,12,8]	775x3 double	775x1 uint16	[139.242834394904,533.042993630573,136.464968152866]	4148.85	20480	164x2 double	164	1x100 double	1x100 double	412	340.125	[93.0613744946711,350.047776552738,122.509371554576]	[250;388;298;399;315;266;393;412]	420	1.43243	2.73527	4.52201	1x100 double	100	TRUE	TRUE	[]	2731.71	1x100 double	0.548571	137	1.52308	2.37913	3.90221	49.14
032421_S019	4430	40x water	516	[234.500000000000,749.500000000000,60.5000000000000,11,9,9]	516x3 double	516x1 uint16	[239.645374449339,753.325991189427,65.6552863436123]	4504.81	28160	84x2 double	84	1x100 double	1x100 double	378	290.667	[4.50688073394495,829.702981651376,57.7207568807339]	[238;249;261;361;257;378]	426	1	1.90248	4.73554	1x100 double	100	TRUE	TRUE	[]	2560	1x100 double	0.809524	65	0.349714	1.89474	2.24445	23.22
032421_S019	4430	40x water	3377	[136.500000000000,156.500000000000,93.5000000000000,39,19,10]	3377x3 double	3377x1 uint16	[155.814307751639,167.855958349402,98.5393366756653]	3931.35	23040	478x2 double	478	1x100 double	1x100 double	342	310	[230.551612903226,789,85]	[278;342]	436	1.09882	1.65045	4.74732	1x100 double	100	TRUE	TRUE	[]	2442.18	1x100 double	0.592105	97	0.896471	6.705	7.60147	34.74
032421_S029	4430	40x water	4014	[267.500000000000,652.500000000000,96.5000000000000,32,62,12]	4014x3 double	4014x1 uint16	[288.020680225602,679.975559733379,101.370364040335]	3731.58	23040	1019x2 double	1019	1x100 double	1x100 double	44642	7327.03	[123.156811261173,726.185006240847,99.8506572129495]	32076x1 uint16	1	1.25964	1.18102	3.39184	1x100 double	100	TRUE	FALSE	[]	2703.2	1x100 double	0.473978	100	0.342537	1.62439	1.96693	35.82
032421_S029	4430	40x water	1169	[245.500000000000,629.500000000000,98.5000000000000,19,47,8]	1169x3 double	1169x1 uint16	[256.652235628105,652.479772888574,101.543647977289]	6171.15	28160	381x2 double	381	1x100 double	1x100 double	10954	5003.44	[12.5294356341965,745.031982029876,100.312251770162]	297x1 uint16	16	1.06135	2.02335	4.81503	1x100 double	100	TRUE	TRUE	[]	4481.68	1x100 double	0.397301	102	0.992903	0.918	1.9109	36.54
032421_S029	4430	40x water	3400	[0.500000000000000,685.500000000000,33.5000000000000,22,58,14]	3400x3 double	3400x1 uint16	[8.30687990343995,711.451719975860,39.2634278817139]	4990.49	28160	640x2 double	640	1x100 double	1x100 double	10543	3994.44	[13.8150567456353,647.617030770801,41.1813398648867]	3893x1 uint16	18	1.05376	4.36161	5.72109	1x100 double	100	TRUE	TRUE	[]	3716	1x100 double	0.40366	42	2.67387	5.55333	8.2272	14.94
032421_S029	4430	40x water	650	[250.500000000000,686.500000000000,98.5000000000000,30,13,5]	650x3 double	650x1 uint16	[266.214571657326,693.810248198559,100.842273819055]	4919.14	23040	245x2 double	245	1x100 double	1x100 double	10420	4699.32	[74.7519276865606,707.810498555582,100.594716180398]	1343x1 uint16	19	1.02655	2.32931	4.89655	1x100 double	100	TRUE	FALSE	[]	3792.98	1x100 double	0.322314	101	0.893208	0.7164	1.60961	36.18
032421_S029	4430	40x water	3893	[1.50000000000000,619.500000000000,33.5000000000000,27,55,14]	3893x3 double	3893x1 uint16	[14.2933143980773,643.312431723837,41.7764911514092]	6019.58	28160	839x2 double	839	1x100 double	1x100 double	6084	3174.17	[285.193415285420,907.766139860953,35.5957747469711]	103x1 uint16	52	1.0172	1.89224	5.34249	1x100 double	100	TRUE	TRUE	[]	4509.75	1x100 double	0.41272	43	1.58904	4.66312	6.25217	15.3
032421_S029	4430	40x water	5450	[42.5000000000000,749.500000000000,283.500000000000,59,46,9]	5450x3 double	5450x1 uint16	[72.8055651932552,769.050170009021,287.942682672958]	6769.2	40960	1264x2 double	1264	1x61 double	1x61 double	3680	2425.59	[18.4391453659864,535.348424443859,279.005202267917]	97x1 uint16	122	1	2.72691	2.89853	1x61 double	61	TRUE	TRUE	[]	4852.66	1x61 double	0.360601	286	0.262703	1.947	2.5697	102.78
032421_S029	4430	40x water	2938	[247.500000000000,9.50000000000000,109.500000000000,27,29,12]	2938x3 double	2938x1 uint16	[263.396284041741,26.0054721303131,115.236574191906]	6847	30720	429x2 double	429	1x100 double	1x100 double	2918	1587.25	[279.918909788167,740.769092403214,107.824369978086]	69x1 uint16	166	1.06847	5.5229	5.71164	1x100 double	100	TRUE	TRUE	[]	4660.51	1x100 double	0.460948	119	2.89346	1.42435	4.31781	42.66
032421_S029	4430	40x water	1281	[233.500000000000,12.5000000000000,110.500000000000,24,19,11]	1281x3 double	1281x1 uint16	[244.270056854075,21.2583701831965,115.153506001263]	6327.06	23040	249x2 double	249	1x100 double	1x100 double	2703	1627.15	[294.467615007570,229.172215310359,107.631750933102]	41x1 uint16	182	1.125	7.01313	4.66013	1x100 double	100	TRUE	TRUE	[]	4719.04	1x100 double	0.3878	121	3.43636	0.627692	4.06406	43.38
032421_S029	4430	40x water	1651	[248.500000000000,10.5000000000000,198.500000000000,22,29,9]	1651x3 double	1651x1 uint16	[262.815929613336,26.8740449178050,202.904376012966]	6696.94	25600	324x2 double	324	1x100 double	1x100 double	2694	1267.43	[20.0595130748422,378.825574842200,194.916290952810]	42x1 uint16	183	1.17942	1.0772	4.05145	1x100 double	100	TRUE	TRUE	[]	4859.26	1x100 double	0.435772	202	0.658065	2.50615	3.16422	72.54
032421_S029	4430	40x water	5070	[277.500000000000,0.500000000000000,261.500000000000,23,35,10]	5070x3 double	5070x1 uint16	[289.781972455659,21.4421370127433,266.083756842121]	14244.2	65535	703x2 double	703	1x83 double	1x83 double	2353	1092.85	[18.5708328333133,729.890405616225,256.177052082083]	61x1 uint16	217	1.22161	1.29439	3.57768	1x83 double	83	TRUE	TRUE	[]	11008.4	1x83 double	0.447635	264	0.411857	3.07605	3.48791	94.86
032421_S029	4430	40x water	9430	[136.500000000000,924.500000000000,63.5000000000000,55,44,12]	9430x3 double	9430x1 uint16	[161.968601509364,946.002562191372,69.5021895089910]	5827.46	35840	1276x2 double	1276	1x100 double	1x100 double	2112	1461.18	[141.339331723027,488.399718196457,62.5932367149758]	17x1 uint16	243	1.1254	1.21754	3.49734	1x100 double	100	TRUE	TRUE	[]	3819.94	1x100 double	0.656513	67	0.226815	2.09455	2.32136	23.94
032421_S029	4430	40x water	18286	[75.5000000000000,396.500000000000,184.500000000000,72,58,13]	18286x3 double	18286x1 uint16	[121.808701519392,424.149940023990,190.587739904038]	5602.15	46080	2455x2 double	2455	1x100 double	1x100 double	2105	1359.91	[127.754299916906,355.147906846777,180.682905486392]	100x1 uint16	245	1.06392	1.05058	5.5731	1x100 double	100	TRUE	TRUE	[]	3379.62	1x100 double	0.694539	190	1.0292	2.94214	3.97134	68.22
032421_S029	4430	40x water	9660	[75.5000000000000,691.500000000000,172.500000000000,104,60,8]	9660x3 double	9660x1 uint16	[115.914079368625,722.127168490805,176.123669123669]	7118.71	56320	2247x2 double	2247	1x100 double	1x100 double	2019	1031.93	[272.475127413682,180.797968559328,167.902986146005]	27x1 uint16	251	1.01305	5.39776	2.03467	1x100 double	100	TRUE	TRUE	[]	5035.69	1x100 double	0.494344	225	0.537709	0.83984	1.37755	80.82
032421_S029	4430	40x water	8482	[0.500000000000000,0.500000000000000,130.500000000000,23,74,12]	8482x3 double	8482x1 uint16	[6.48539878200895,34.9342211460856,136.163658375523]	8226.89	58880	1123x2 double	1123	1x100 double	1x100 double	1829	1156.91	[76.2732987584473,843.925192519252,127.158022945152]	11x1 uint16	274	1.04876	0.858901	4.00761	1x100 double	100	TRUE	FALSE	[]	5466.5	1x100 double	0.533361	134	0.48043	2.94561	3.42604	48.06
032421_S029	4430	40x water	1958	[256.500000000000,285.500000000000,61.5000000000000,18,24,13]	1958x3 double	1958x1 uint16	[265.256574727389,297.400042762455,68.1729741287150]	6114.97	23040	301x2 double	301	1x100 double	1x100 double	1809	1236.29	[190.603080448923,121.223214586633,62.0915371911968]	24x1 uint16	278	1.0396	0.955853	4.5381	1x100 double	100	TRUE	TRUE	[]	4201.46	1x100 double	0.504049	67	0.650769	2.085	2.73577	23.94
032421_S029	4430	40x water	3510	[155.500000000000,344.500000000000,292.500000000000,22,28,10]	3510x3 double	3510x1 uint16	[167.668593020671,357.753056234719,297.089353189598]	6562.64	33280	493x2 double	493	1x52 double	1x52 double	1787	1636.6	[277.617133080777,797.810949529512,285.584382255896]	[1685;1716;1448;1547;1787]	281	1.18815	3.1804	2.88856	1x52 double	52	TRUE	TRUE	[]	4470.91	1x52 double	0.54007	295	0.451899	3.36783	3.81972	106.02
032421_S029	4430	40x water	6318	[262.500000000000,815.500000000000,49.5000000000000,36,57,19]	6318x3 double	6318x1 uint16	[279.879775118928,842.822401614531,62.1049445005045]	2810.81	17920	1125x2 double	1125	1x100 double	1x100 double	1484	1207.75	[294.753260194577,738.446077416684,49.1769819913062]	[1192;1484;1300;855]	313	1.15663	1.66392	3.55903	1x100 double	100	TRUE	TRUE	[]	1895.54	1x100 double	0.456182	60	0.512393	6.51892	7.03131	21.42
032421_S029	4430	40x water	13533	[27.5000000000000,694.500000000000,212.500000000000,140,55,17]	13533x3 double	13533x1 uint16	[107.249021563963,722.938633514952,222.153301102499]	7395.11	46080	2462x2 double	2462	1x100 double	1x100 double	1457	785.857	[291.008301520936,122.788341513664,208.524631885112]	21x1 uint16	320	1.23765	3.44636	3.77007	1x100 double	100	TRUE	TRUE	[]	4936.99	1x100 double	0.482308	225	0.552812	0.980129	1.53294	80.82
032421_S029	4430	40x water	2406	[22.5000000000000,735.500000000000,95.5000000000000,46,13,8]	2406x3 double	2406x1 uint16	[42.3658949745906,742.684076792772,100.120976849238]	7537.42	35840	445x2 double	445	1x100 double	1x100 double	1341	772.769	[279.688433207247,231.948735815250,94.0458889110094]	13x1 uint16	330	1.13175	3.23029	5.17928	1x100 double	100	TRUE	TRUE	[]	5102.74	1x100 double	0.546787	101	1.29152	0.958065	2.24959	36.18
032421_S029	4430	40x water	5031	[9.50000000000000,513.500000000000,189.500000000000,57,30,11]	5031x3 double	5031x1 uint16	[43.4646935233397,525.411985018727,194.623275783320]	5570.33	33280	844x2 double	844	1x100 double	1x100 double	1207	1024.33	[290.192645623170,913.014480963228,181]	[767;1207;1180;1041;929;1022]	348	1.07973	1.96094	3.11897	1x100 double	100	TRUE	TRUE	[]	3870.33	1x100 double	0.467868	192	0.225756	3.67541	3.90116	68.94
032421_S029	4430	40x water	2556	[156.500000000000,342.500000000000,129.500000000000,21,27,16]	2556x3 double	2556x1 uint16	[167.777811876630,355.213595212521,134.555009973914]	6527.2	30720	394x2 double	394	1x100 double	1x100 double	1086	1086	[4,792,126]	1086	358	1.04977	5.23839	5.69828	1x100 double	100	TRUE	TRUE	[]	4574.21	1x100 double	0.392045	143	1.07719	5.95149	7.02868	51.3
032421_S029	4430	40x water	32076	[74.5000000000000,693.500000000000,94.5000000000000,111,92,12]	32076x3 double	32076x1 uint16	[128.196911290225,729.427561538555,99.8587241550155]	6604.55	56320	5832x2 double	5832	1x100 double	1x100 double	1017	743.5	[28.0576424248247,473.169372658277,93.6223460466904]	14x1 uint16	369	1.01211	1.27504	5.35131	1x100 double	100	TRUE	TRUE	[]	4491.41	1x100 double	0.457193	100	0.97285	1.52743	2.50028	35.82
032421_S029	4430	40x water	6550	[68.5000000000000,202.500000000000,73.5000000000000,57,26,12]	6550x3 double	6550x1 uint16	[93.6154602675059,212.113165486494,79.0913978494624]	5961.09	46080	903x2 double	903	1x100 double	1x100 double	969	533.812	[144.637161924833,505.424657534247,71.4946727549467]	16x1 uint16	372	1.09347	1.8625	5.35968	1x100 double	100	TRUE	TRUE	[]	4025.69	1x100 double	0.456338	78	0.821739	4.32973	5.15147	27.9
032421_S029	4430	40x water	26367	[18.5000000000000,664.500000000000,32.5000000000000,102,88,13]	26367x3 double	26367x1 uint16	[61.2775131976172,720.095507159808,39.0010654956977]	6014.11	38400	4081x2 double	4081	1x100 double	1x100 double	935	854.5	[229.452896430661,457,32]	[935;774]	376	1.02827	2.27141	6.07962	1x100 double	100	TRUE	TRUE	[]	4424.33	1x100 double	0.366085	40	1.95886	4.56811	6.52697	14.22
032421_S029	4430	40x water	11311	[139.500000000000,431.500000000000,270.500000000000,37,47,14]	11311x3 double	11311x1 uint16	[160.373676808054,454.316233622030,278.104893034273]	6114.94	38400	1143x2 double	1143	1x71 double	1x71 double	886	746.2	[175.444116858751,555.871616188689,264.129991959260]	[765;824;886;771;485]	383	1.02734	4.12338	6.21103	1x71 double	71	TRUE	TRUE	[]	3619.39	1x71 double	0.723391	281	2.53742	2.60824	5.14565	100.98
032421_S029	4430	40x water	92907	[0.500000000000000,409.500000000000,269.500000000000,146,150,17]	92907x3 double	92907x1 uint16	[59.2456979240065,482.048293221354,277.557532756872]	6765.19	53760	10444x2 double	10444	1x71 double	1x71 double	879	678.6	[10.3657530209254,351.601827291482,262.844385499558]	[528;745;879;606;635]	385	1.01306	3.23902	6.68435	1x71 double	71	TRUE	TRUE	[]	4287.34	1x71 double	0.551083	279	2.33663	3.375	5.71163	100.26
032421_S029	4430	40x water	8524	[95.5000000000000,399.500000000000,275.500000000000,49,51,15]	8524x3 double	8524x1 uint16	[121.981565196971,424.941231726648,283.850114483649]	5115.5	30720	1378x2 double	1378	1x65 double	1x65 double	785	661.125	[9.45150311968236,872.465305350728,268.563622612970]	[700;634;580;394;785;782;763;651]	394	1.09199	0.921472	4.06708	1x65 double	65	TRUE	FALSE	[]	3429.43	1x65 double	0.486457	282	0.527166	4.84535	5.37252	101.34
032421_S029	4430	40x water	3600	[224.500000000000,87.5000000000000,150.500000000000,34,27,9]	3600x3 double	3600x1 uint16	[243.210869263829,101.866075142105,154.764868986552]	5129.24	28160	596x2 double	596	1x100 double	1x100 double	653	431	[92.9936194895592,57,147.780742459397]	[378;352;653;341]	407	1.30203	2.37888	2.23055	1x100 double	100	TRUE	TRUE	[]	3986.04	1x100 double	0.418103	152	0.157652	2.16	2.31765	54.54
032421_S029	4430	40x water	1343	[60.5000000000000,700.500000000000,96.5000000000000,31,16,9]	1343x3 double	1343x1 uint16	[72.6719538572459,708.445565969719,100.548666186013]	5287.74	30720	283x2 double	283	1x100 double	1x100 double	517	517	[289,405,94]	517	414	1.01657	1.72545	5.22283	1x100 double	100	TRUE	TRUE	[]	3790.25	1x100 double	0.420048	100	0.92	2.34212	3.26212	35.82
032421_S029	4430	40x water	1462	[41.5000000000000,797.500000000000,159.500000000000,22,14,9]	1462x3 double	1462x1 uint16	[51.8522155085599,804.390231621350,163.195367573011]	6955.08	28160	253x2 double	253	1x100 double	1x100 double	386	319.75	[114.565285379203,445.892103205629,154]	[308;248;386;337]	427	1.14286	3.82977	3.10938	1x100 double	100	TRUE	TRUE	[]	4786.09	1x100 double	0.450317	161	0.57871	3.95526	4.53397	57.78
032421_S029	4430	40x water	8787	[258.500000000000,815.500000000000,149.500000000000,40,49,15]	8787x3 double	8787x1 uint16	[279.060970464135,839.490506329114,157.100210970464]	2761.9	23040	1296x2 double	1296	1x100 double	1x100 double	313	286.75	[285.483870967742,636.468177855275,146.272885789015]	[279;297;258;313]	436	1.10462	1.64176	5.25348	1x100 double	100	TRUE	TRUE	[]	2048.4	1x100 double	0.380906	156	0.872948	6.45158	7.32453	55.98
032421_S029	4430	40x water	13719	[105.500000000000,218.500000000000,72.5000000000000,52,51,12]	13719x3 double	13719x1 uint16	[135.100393316411,244.095260676727,78.5542971909956]	6689.51	43520	1647x2 double	1647	1x100 double	1x100 double	183	140.5	[256,459.651245551601,70]	[98;183]	440	1.05138	1.53284	5.74234	1x100 double	100	TRUE	TRUE	[]	4319.51	1x100 double	0.602375	78	1.14527	4.70057	5.84585	27.9
032421_S022	4430	40x water	1207	[160.500000000000,230.500000000000,130.500000000000,17,16,11]	1207x3 double	1207x1 uint16	[168.776320331377,240.555402140145,136.224024853297]	6144.42	23040	165x2 double	165	1x100 double	1x100 double	5279	3054.7	[223.297967050528,1007.78347296342,129.889608616064]	169x1 uint16	16	1.04255	4.00365	5.28571	1x100 double	100	TRUE	TRUE	[]	4452.85	1x100 double	0.463415	138	2.35143	1.07143	3.42286	49.5
032421_S022	4430	40x water	802	[125.500000000000,682.500000000000,193.500000000000,39,12,6]	802x3 double	802x1 uint16	[139.181054239878,688.653934300993,196.306722689076]	8356.71	35840	219x2 double	219	1x100 double	1x100 double	3001	1629.26	[249.502807456240,221.442759718118,186.755421686747]	54x1 uint16	87	1.06383	1.28905	3.956	1x100 double	100	TRUE	TRUE	[]	5342.1	1x100 double	0.540481	195	0.329333	1.55727	1.88661	70.02
032421_S022	4430	40x water	843	[42.5000000000000,12.5000000000000,119.500000000000,13,11,12]	843x3 double	843x1 uint16	[49.3566878980892,18.2535031847134,125.342675159236]	4767.73	20480	111x2 double	111	1x100 double	1x100 double	2837	2299.61	[291.568865762067,325.782210691569,117.482064019694]	59x1 uint16	99	1.16071	6.21922	4.04615	1x100 double	100	TRUE	TRUE	[]	3574.77	1x100 double	0.4	131	0.72	0.293684	1.01368	46.98
032421_S022	4430	40x water	2552	[209.500000000000,459.500000000000,178.500000000000,39,19,10]	2552x3 double	2552x1 uint16	[230.059799671102,468.700403647780,183.762146808193]	6709.97	28160	438x2 double	438	1x100 double	1x100 double	2260	1411.85	[88.4851521511018,81.4633001049318,173.416369359916]	27x1 uint16	140	1.03763	3.70047	5.00518	1x100 double	100	TRUE	TRUE	[]	4634.89	1x100 double	0.416141	183	0.964918	6.00353	6.96845	65.7
032421_S022	4430	40x water	988	[32.5000000000000,129.500000000000,155.500000000000,11,26,11]	988x3 double	988x1 uint16	[37.0737485670615,145.848299579671,160.426442491402]	6780.89	30720	184x2 double	184	1x100 double	1x100 double	1947	1302.15	[297.931382713205,749.834734861575,151.768267864685]	20x1 uint16	167	1.17021	4.78937	2.24545	1x100 double	100	TRUE	TRUE	[]	5036.52	1x100 double	0.38674	158	0.460935	1.19077	1.6517	56.7
032421_S022	4430	40x water	1360	[55.5000000000000,618.500000000000,145.500000000000,32,44,8]	1360x3 double	1360x1 uint16	[72.0111816258688,639.349048050771,148.543668782109]	6228.71	25600	410x2 double	410	1x100 double	1x100 double	1702	1441.62	[70.5120858011846,256.738327730644,139.506109599274]	13x1 uint16	187	1.01105	3.97692	3.19672	1x100 double	100	TRUE	TRUE	[]	4807.8	1x100 double	0.293506	146	0.199412	2.48049	2.6799	52.38
032421_S022	4430	40x water	836	[233.500000000000,158.500000000000,28.5000000000000,16,9,11]	836x3 double	836x1 uint16	[241.117860851506,163.393042575286,34.1895119418484]	5897.8	30720	126x2 double	126	1x100 double	1x100 double	1453	1229.25	[6.34065487085621,214.799979662396,29.5717917429327]	[1325;1453;1433;1091;1182;1146;1181;1023]	208	1.21374	3.79483	4.66038	1x100 double	100	TRUE	TRUE	[]	4043.17	1x100 double	0.537688	35	1.49226	3.0225	4.51476	12.42
032421_S022	4430	40x water	12431	[160.500000000000,650.500000000000,190.500000000000,80,57,10]	12431x3 double	12431x1 uint16	[203.977112676056,678.625971345313,194.998846527441]	6784.38	46080	2293x2 double	2293	1x100 double	1x100 double	1124	741.857	[153.458116695552,667.134026574235,181]	[517;619;1105;569;1124;746;513]	237	1.15522	1.01492	3.85643	1x100 double	100	TRUE	TRUE	[]	4912.34	1x100 double	0.475	194	0.548887	1.40814	1.95703	69.66
032421_S022	4430	40x water	715	[66.5000000000000,294.500000000000,255.500000000000,15,10,8]	715x3 double	715x1 uint16	[74.3559748427673,299.292662473795,259.498951781971]	8539.3	30720	125x2 double	125	1x90 double	1x90 double	979	613.5	[235.471230643847,994.796088019560,248.313936430318]	[809;979;458;594;913;456;435;563;327;601]	245	1.02454	8.07567	4.7006	1x90 double	90	TRUE	TRUE	[]	6103.04	1x90 double	0.348993	262	2.04845	0.334286	2.38274	94.14
032421_S022	4430	40x water	1284	[59.5000000000000,262.500000000000,153.500000000000,15,10,16]	1284x3 double	1284x1 uint16	[67.3977953510664,266.690630242032,161.272465851905]	8320	43520	121x2 double	121	1x100 double	1x100 double	825	763	[61.4593709043250,847,150]	[825;701]	252	1.23377	4.05836	3.2	1x100 double	100	TRUE	TRUE	[]	5691.24	1x100 double	0.639405	165	1.0214	6.59415	7.61554	59.22
032421_S022	4430	40x water	1445	[187.500000000000,725.500000000000,192.500000000000,30,23,8]	1445x3 double	1445x1 uint16	[206.572783952291,739.133369476823,196.123881810789]	6535.53	23040	311x2 double	311	1x100 double	1x100 double	796	630.429	[242.540675277589,113.659641966916,183.799002945842]	[514;373;455;717;773;785;796]	255	1	2.61817	4.27273	1x100 double	100	TRUE	TRUE	[]	4856.59	1x100 double	0.29661	195	0.788906	2.57642	3.72532	70.02
032421_S022	4430	40x water	105626	[168.500000000000,289.500000000000,99.5000000000000,132,138,27]	105626x3 double	105626x1 uint16	[244.917606433336,363.418344583933,111.631893183986]	6681.72	58880	9456x2 double	9456	1x100 double	1x100 double	785	785	[225,17,98]	785	256	1.04543	4.6324	6.05759	1x100 double	100	TRUE	TRUE	[]	4330.02	1x100 double	0.635738	116	3.25914	5.35765	8.61679	41.58
032421_S030	4430	40x water	2425	[6.50000000000000,978.500000000000,19.5000000000000,38,21,9]	2425x3 double	2425x1 uint16	[25.2740157480315,988.483149606299,22.5521259842520]	3351.75	28160	513x2 double	513	1x100 double	1x100 double	23315	7471.7	[24.6102318471248,989.308749730047,21.9836600818406]	2425x1 uint16	6	1.27302	2.0044	2.90524	1x100 double	100	TRUE	FALSE	[]	2011.07	1x100 double	0.71464	19	0.526789	4.64	5.16679	6.66
032421_S030	4430	40x water	3593	[241.500000000000,81.5000000000000,313.500000000000,26,31,13]	3593x3 double	3593x1 uint16	[249.601694915254,96.1559851694915,320.056938559322]	2690.39	23040	481x2 double	481	1x29 double	1x29 double	19809	4903.76	[290.628054079511,99.1461982113133,301.518416031962]	1254x1 uint16	8	1.46835	5.48394	2.17241	1x29 double	29	TRUE	TRUE	[]	1655.22	1x29 double	0.707395	321	1.74076	1.75846	3.49922	115.38
032421_S030	4430	40x water	1538	[8.50000000000000,658.500000000000,309.500000000000,26,13,10]	1538x3 double	1538x1 uint16	[20.4077669902913,665.150305645451,314.463861920173]	4628.97	30720	231x2 double	231	1x35 double	1x35 double	9286	3783.84	[35.0195456381422,25.0844140454683,295.005987540224]	494x1 uint16	28	1.20253	5.82334	1.70526	1x35 double	35	TRUE	TRUE	[]	3114.11	1x35 double	0.55516	316	1.92	0.71122	2.63122	113.58
032421_S030	4430	40x water	11833	[229.500000000000,91.5000000000000,299.500000000000,67,58,30]	11833x3 double	11833x1 uint16	[252.355940130964,123.839881509199,309.822263797942]	1387.63	23040	1965x2 double	1965	1x39 double	1x39 double	8780	4054.42	[289.832128444662,318.169173058058,286.968003099081]	177x1 uint16	31	1.11261	2.68462	3.5749	1x39 double	39	TRUE	TRUE	[]	1151.67	1x39 double	0.391403	309	1.00645	2.34947	3.35593	111.06
032421_S030	4430	40x water	503	[201.500000000000,866.500000000000,247.500000000000,26,13,5]	503x3 double	503x1 uint16	[214.873601053325,871.934825543121,250.154048716261]	7730.89	33280	195x2 double	195	1x99 double	1x99 double	6822	2916.64	[291.946713887645,283.444303953006,226.368922148806]	173x1 uint16	42	1.33333	2.15323	3.93056	1x99 double	99	TRUE	TRUE	[]	5067.49	1x99 double	0.546632	250	0.9192	2.85	3.7692	89.82
032421_S030	4430	40x water	5479	[184.500000000000,210.500000000000,181.500000000000,76,72,8]	5479x3 double	5479x1 uint16	[215.775977841195,245.425214033910,185.952912539869]	5566.68	35840	1570x2 double	1570	1x100 double	1x100 double	6499	3102.09	[149.523202014884,459.576438283730,176.433694116992]	139x1 uint16	46	1.07475	1.30593	3.83238	1x100 double	100	TRUE	TRUE	[]	3835.11	1x100 double	0.445153	185	0.513973	2.04393	2.5579	66.42
032421_S030	4430	40x water	871	[39.5000000000000,857.500000000000,248.500000000000,30,24,6]	871x3 double	871x1 uint16	[54.1613995485327,866.215575620768,251.354401805869]	5208.17	23040	319x2 double	319	1x98 double	1x98 double	4525	2169.71	[135.462144489467,45.8405555662243,227.231473124268]	96x1 uint16	76	1.08	1.13686	4.12169	1x98 double	98	TRUE	TRUE	[]	4148.97	1x98 double	0.319149	250	0.384923	1.87364	2.25856	89.82
032421_S030	4430	40x water	4390	[202.500000000000,559.500000000000,58.5000000000000,55,26,10]	4390x3 double	4390x1 uint16	[234.186161118375,571.041838479332,62.5471185758825]	5798.2	28160	886x2 double	886	1x100 double	1x100 double	3960	2868.18	[84.4421467753432,313.686545077014,56.4081027055506]	45x1 uint16	87	1.22316	3.69958	2.13395	1x100 double	100	TRUE	TRUE	[]	4059.59	1x100 double	0.507473	60	0.218637	3.50115	3.71978	21.42
032421_S030	4430	40x water	78941	[152.500000000000,320.500000000000,302.500000000000,148,112,26]	78941x3 double	78941x1 uint16	[252.104862412343,378.906912910241,312.692017973191]	5174.77	48640	7436x2 double	7436	1x36 double	1x36 double	3855	3450.25	[189.764509818129,577.233461343381,288.279327584958]	[3250;3474;3222;3855]	88	1.10924	236.542	-2.69949	1x36 double	36	TRUE	TRUE	[]	3295.36	1x36 double	0.593293	320	4.68478	[]	[]	115.02
032421_S030	4430	40x water	2291	[183.500000000000,482.500000000000,194.500000000000,45,12,9]	2291x3 double	2291x1 uint16	[203.380752339125,488.295398128700,198.572656100821]	5851.91	35840	393x2 double	393	1x100 double	1x100 double	3783	2219.67	[122.421078820318,257.077542731882,187.327983162764]	67x1 uint16	92	1.16474	1.62066	5.12159	1x100 double	100	TRUE	TRUE	[]	3999.59	1x100 double	0.539088	198	0.661188	1.218	1.87919	71.1
032421_S030	4430	40x water	538	[87.5000000000000,182.500000000000,276.500000000000,13,11,9]	538x3 double	538x1 uint16	[95.0258397932817,188.039621016365,280.455641688200]	5524.46	35840	102x2 double	102	1x69 double	1x69 double	2308	1606.76	[150.031338092623,111.436207212155,261.351894563427]	17x1 uint16	158	1.01639	3.36785	3.1129	1x69 double	69	TRUE	TRUE	[]	3639.22	1x69 double	0.462069	278	0.236471	1.38375	1.62022	99.9
032421_S030	4430	40x water	6644	[77.5000000000000,854.500000000000,246.500000000000,121,46,8]	6644x3 double	6644x1 uint16	[143.183847455421,871.164714304308,250.137446310035]	5920.67	38400	1947x2 double	1947	1x99 double	1x99 double	2141	1389.83	[187.784074829116,47.3685333972898,223.957237078786]	30x1 uint16	173	1.07678	1.34712	3.3037	1x99 double	99	TRUE	TRUE	[]	4236.43	1x99 double	0.403166	248	0.205827	2.71488	2.92071	89.1
032421_S030	4430	40x water	72669	[157.500000000000,852.500000000000,231.500000000000,143,162,30]	72669x3 double	72669x1 uint16	[263.835063583943,931.047358693126,250.388531648091]	6365.95	58880	7301x2 double	7301	1x99 double	1x99 double	2091	1305	[287.364422550629,176.896504808820,217.618578465869]	49x1 uint16	187	1.01985	5.17762	6.39579	1x99 double	99	TRUE	TRUE	[]	3893.47	1x99 double	0.651207	254	2.84733	7.65444	10.5018	91.26
032421_S030	4430	40x water	10196	[36.5000000000000,738.500000000000,316.500000000000,53,47,12]	10196x3 double	10196x1 uint16	[61.6909064623392,762.344368946075,321.649559057395]	5210.14	38400	1561x2 double	1561	1x27 double	1x27 double	1969	1001.91	[155.700459121111,959.523512133915,298.677246414007]	35x1 uint16	193	1.82288	11.8243	1.67409	1x27 double	27	TRUE	TRUE	[]	3652.22	1x27 double	0.436911	319	0.406078	3.215	3.62108	114.66
032421_S030	4430	40x water	7890	[116.500000000000,907.500000000000,241.500000000000,79,26,17]	7890x3 double	7890x1 uint16	[153.587174240793,918.368673271592,250.510553521430]	6025.9	43520	965x2 double	965	1x98 double	1x98 double	1956	1373.8	[177.696025622361,705.270854563983,223.243412432669]	20x1 uint16	196	1.04478	6.01887	6.15536	1x98 double	98	TRUE	TRUE	[]	3966.01	1x98 double	0.552508	256	3.17757	7.1352	10.3128	91.98
032421_S030	4430	40x water	13414	[39.5000000000000,195.500000000000,32.5000000000000,70,30,18]	13414x3 double	13414x1 uint16	[75.9099581200558,207.202962618272,43.0190010857763]	4921.52	43520	1338x2 double	1338	1x100 double	1x100 double	1691	1311.38	[283.506624725956,478.582785244495,32.5484701172434]	[979;1363;1009;1386;1160;1674;1229;1691]	219	1.02085	6.73727	4.80873	1x100 double	100	TRUE	TRUE	[]	2793.42	1x100 double	0.784247	42	1.09139	15.9939	17.0853	14.94
032421_S030	4430	40x water	5150	[68.5000000000000,436.500000000000,283.500000000000,98,23,9]	5150x3 double	5150x1 uint16	[125.352518768360,448.986726145142,288.294092046567]	4568.73	33280	1082x2 double	1082	1x61 double	1x61 double	1463	1406.67	[294.970616113744,946,269.317298578199]	[1463;1418;1339]	243	1.23661	3.3362	4.31983	1x61 double	61	TRUE	TRUE	[]	3094.71	1x61 double	0.551988	289	1.09093	0.572977	1.66391	103.86
032421_S030	4430	40x water	1435	[110.500000000000,395.500000000000,244.500000000000,40,8,12]	1435x3 double	1435x1 uint16	[127.150529500756,400.037443267776,249.958774583964]	4716.82	23040	234x2 double	234	1x99 double	1x99 double	1413	1165.4	[121.449974257766,639.013643384246,223.307791316286]	[1204;1413;1128;987;1278;1135;922;1082;1336;1169]	251	1.09804	5.00111	4.35714	1x99 double	99	TRUE	TRUE	[]	2844.44	1x99 double	0.730769	251	1.99333	7.07478	9.06812	90.18
032421_S030	4430	40x water	8046	[240.500000000000,526.500000000000,117.500000000000,60,61,11]	8046x3 double	8046x1 uint16	[287.225214368482,549.385307068366,123.173256083430]	6864.53	58880	1461x2 double	1461	1x100 double	1x100 double	1234	1082.67	[8.47983374384237,389,114.292641625616]	[1124;1234;1174;1063;960;941]	269	1.08953	0.849803	3.47493	1x100 double	100	TRUE	FALSE	[]	4540.01	1x100 double	0.572752	121	0.233293	1.99489	2.22818	43.38
032421_S030	4430	40x water	17603	[0.500000000000000,577.500000000000,156.500000000000,46,52,29]	17603x3 double	17603x1 uint16	[17.4542060529033,604.978658617312,175.629173617179]	5492.45	56320	1527x2 double	1527	1x100 double	1x100 double	893	829.25	[77.4630690382876,851.485679831173,150]	[893;888;813;723]	307	1.03582	1.98206	4.67082	1x100 double	100	TRUE	TRUE	[]	3522.31	1x100 double	0.572109	178	0.889703	6.46667	7.35637	63.9
032421_S030	4430	40x water	8693	[221.500000000000,108.500000000000,40.5000000000000,65,39,19]	8693x3 double	8693x1 uint16	[246.521867718229,125.225757304176,52.1403477325686]	3285.92	30720	1310x2 double	1310	1x100 double	1x100 double	313	243	[120.644032921811,112,40]	[173;313]	352	1.02039	1.4809	5.57286	1x100 double	100	TRUE	FALSE	[]	2057.77	1x100 double	0.644824	52	1.189	2.59043	3.77944	18.54
032421_S030	4430	40x water	12936	[1.50000000000000,0.500000000000000,149.500000000000,62,29,16]	12936x3 double	12936x1 uint16	[36.7950807205093,9.86430697694631,158.202246702736]	9107.83	61440	1129x2 double	1129	1x100 double	1x100 double	235	195	[184,53.6025641025641,143]	[155;235]	355	1.03186	8.34773	6.51827	1x100 double	100	TRUE	TRUE	[]	4648.36	1x100 double	0.969268	160	2.52867	14.7757	17.3044	57.42
032421_S032	4430	40x water	18107	[237.500000000000,459.500000000000,250.500000000000,63,95,15]	18107x3 double	18107x1 uint16	[272.215997925973,510.888640714742,259.372507179324]	7089.45	48640	3217x2 double	3217	1x90 double	1x90 double	17195	5330.26	[291.608306391445,1008.44655104428,248.333343861079]	992x1 uint16	12	1.24259	0.384998	4.08839	1x90 double	90	TRUE	TRUE	[]	5010.18	1x90 double	0.443615	258	0.567269	2.64292	3.21019	92.7
032421_S032	4430	40x water	2067	[121.500000000000,396.500000000000,241.500000000000,55,21,15]	2067x3 double	2067x1 uint16	[147.273299748111,405.771536523929,246.945088161209]	4916.88	30720	417x2 double	417	1x100 double	1x100 double	10321	9146.6	[105,304.579647081976,233.706448297728]	[10306;10321;8918;8986;7202]	26	1.05882	3.94627	2.5	1x100 double	100	TRUE	TRUE	[]	3665.04	1x100 double	0.316583	243	0.187956	4.1544	4.34236	87.3
032421_S032	4430	40x water	3054	[124.500000000000,475.500000000000,267.500000000000,50,15,10]	3054x3 double	3054x1 uint16	[147.803983559911,483.192222573506,272.380018969333]	5302.74	35840	494x2 double	494	1x77 double	1x77 double	10268	3317.04	[150.416378264504,462.188755658010,262.329652772400]	911x1 uint16	27	1.0641	2.15467	5.96386	1x77 double	77	TRUE	TRUE	[]	3731.17	1x77 double	0.384722	272	1.24714	3.81	5.05714	97.74
032421_S032	4430	40x water	1792	[186.500000000000,539.500000000000,255.500000000000,48,16,11]	1792x3 double	1792x1 uint16	[216.161916461916,546.234889434889,260.677149877150]	5814.29	23040	414x2 double	414	1x88 double	1x88 double	9432	3746.16	[239.208532042191,6.88198640321371,251.857911581166]	840x1 uint16	33	1.06987	6.87736	4.65714	1x88 double	88	TRUE	TRUE	[]	4291.4	1x88 double	0.332853	260	1.19824	5.92714	7.12538	93.42
032421_S032	4430	40x water	433	[39.5000000000000,719.500000000000,110.500000000000,15,9,6]	433x3 double	433x1 uint16	[47.0509355509356,724.735966735967,113.660083160083]	5687.58	23040	109x2 double	109	1x100 double	1x100 double	8577	4414.01	[155.225617800407,652.441903263605,109.859412736615]	430x1 uint16	41	1.02857	6.5302	3.76389	1x100 double	100	TRUE	TRUE	[]	4720.73	1x100 double	0.412935	130	1.50429	0.31125	1.81554	46.62
032421_S032	4430	40x water	669	[190.500000000000,478.500000000000,75.5000000000000,24,9,7]	669x3 double	669x1 uint16	[203.650279329609,482.913407821229,78.6748603351955]	6849.63	25600	159x2 double	159	1x100 double	1x100 double	7863	3950.72	[293.759283249127,236.607334168528,77.2064064479707]	178x1 uint16	47	1.01379	1.16206	3.80272	1x100 double	100	TRUE	TRUE	[]	4781.89	1x100 double	0.47138	77	0.336	0.949787	1.28579	27.54
032421_S032	4430	40x water	17317	[0.500000000000000,301.500000000000,194.500000000000,94,51,13]	17317x3 double	17317x1 uint16	[33.9598029648218,330.703099586412,201.116153166969]	6362.38	38400	2258x2 double	2258	1x100 double	1x100 double	7747	5779.59	[293.479629120739,998.888624265926,184.878996061189]	17x1 uint16	49	1.0102	1.09051	5.79525	1x100 double	100	TRUE	TRUE	[]	3760.64	1x100 double	0.707266	200	1.09913	4.97124	6.07037	71.82
032421_S032	4430	40x water	1126	[246.500000000000,873.500000000000,116.500000000000,40,10,9]	1126x3 double	1126x1 uint16	[268.719163465642,878.452838241571,120.572769953052]	5326.89	23040	249x2 double	249	1x100 double	1x100 double	7248	4642.75	[219.592256944500,312.851251276607,115.207626728966]	267x1 uint16	55	1.03406	3.00386	5.80941	1x100 double	100	TRUE	TRUE	[]	3300.24	1x100 double	0.719626	122	1.8611	3.93568	5.79678	43.74
032421_S032	4430	40x water	1778	[11.5000000000000,72.5000000000000,317.500000000000,20,31,8]	1778x3 double	1778x1 uint16	[20.7922077922078,88.6301198801199,321.519980019980]	5765.04	25600	391x2 double	391	1x27 double	1x27 double	5462	3352.73	[5.28923988586994,473.285408501856,309.011059913898]	136x1 uint16	87	1.07222	2.08542	3.58549	1x27 double	27	TRUE	TRUE	[]	4085.52	1x27 double	0.416667	321	0.909296	1.56316	2.47245	115.38
032421_S032	4430	40x water	11303	[227.500000000000,549.500000000000,55.5000000000000,73,61,10]	11303x3 double	11303x1 uint16	[267.128439098576,582.286533941656,60.2273952716715]	6552.77	38400	2613x2 double	2613	1x100 double	1x100 double	4923	2284.5	[181.014203058744,124.907985796941,58.0869277081917]	179x1 uint16	98	1.38778	1.47208	3.47798	1x100 double	100	TRUE	TRUE	[]	4909.36	1x100 double	0.367791	59	0.532019	2.796	3.32802	21.06
032421_S032	4430	40x water	586	[292.500000000000,845.500000000000,115.500000000000,7,29,7]	586x3 double	586x1 uint16	[296.185336048880,860.150712830957,119.942294636796]	6434.95	28160	148x2 double	148	1x100 double	1x100 double	4388	3533.83	[196.631492666933,313.982152789298,113.400415686810]	29x1 uint16	113	1.04665	2.8352	5.37883	1x100 double	100	TRUE	TRUE	[]	4185.95	1x100 double	0.77686	122	1.99	1.548	3.538	43.74
032421_S032	4430	40x water	4671	[278.500000000000,175.500000000000,220.500000000000,22,59,13]	4671x3 double	4671x1 uint16	[293.106020942408,215.186681937173,226.139234293194]	3349.76	25600	740x2 double	740	1x100 double	1x100 double	4368	2150.22	[5.19579384780784,516.457041560214,216.348384641867]	77x1 uint16	114	1.10174	3.97268	6.04739	1x100 double	100	TRUE	TRUE	[]	1764.32	1x100 double	0.982353	230	2.56667	3.1997	5.76637	82.62
032421_S032	4430	40x water	1926	[177.500000000000,323.500000000000,85.5000000000000,38,14,11]	1926x3 double	1926x1 uint16	[198.312811980033,332.559900166389,91.2312811980033]	4793.02	25600	319x2 double	319	1x100 double	1x100 double	4129	2106.8	[179.729498459368,137.235517795491,88.4072465382188]	179x1 uint16	128	1.27481	2.90836	2.89222	1x100 double	100	TRUE	TRUE	[]	3033.48	1x100 double	0.703704	89	0.497872	3.44	3.93787	31.86
032421_S032	4430	40x water	1624	[12.5000000000000,55.5000000000000,244.500000000000,20,18,11]	1624x3 double	1624x1 uint16	[20.3055832502493,66.2046360917248,250.402043868395]	6324.33	28160	240x2 double	240	1x99 double	1x99 double	4013	1792.31	[244.064712661934,119.092526074438,240.612949862959]	274x1 uint16	131	1.04902	3.15314	5.38785	1x99 double	99	TRUE	TRUE	[]	4106.67	1x99 double	0.625974	252	1.92769	2.34474	4.27243	90.54
032421_S032	4430	40x water	6009	[177.500000000000,320.500000000000,203.500000000000,71,25,17]	6009x3 double	6009x1 uint16	[208.136444223814,335.208495851358,213.231331111269]	6007.42	38400	1015x2 double	1015	1x100 double	1x100 double	3786	3075.63	[246.865393613056,229.215509789772,198.038025075138]	41x1 uint16	140	1.00742	0.874968	4.40457	1x100 double	100	TRUE	TRUE	[]	4214.54	1x100 double	0.450628	213	0.533448	2.7795	3.31295	76.5
032421_S032	4430	40x water	2049	[266.500000000000,158.500000000000,219.500000000000,32,28,11]	2049x3 double	2049x1 uint16	[283.822510822511,170.546753246753,224.744155844156]	2886.09	20480	434x2 double	434	1x100 double	1x100 double	3572	1859.6	[293.588693791902,290.442741242555,215.134104498986]	184x1 uint16	147	1.12214	0.846101	3.87982	1x100 double	100	TRUE	TRUE	[]	1698.8	1x100 double	0.819444	224	0.527059	3.184	3.71106	80.46
032421_S032	4430	40x water	1099	[71.5000000000000,59.5000000000000,114.500000000000,19,10,14]	1099x3 double	1099x1 uint16	[81.5898912348049,65.3710812539987,121.572616762636]	3640.84	25600	136x2 double	136	1x100 double	1x100 double	3147	2905.43	[73.2889172976694,257.286016324122,113.026452945226]	[2478;2775;3105;2791;3147;3026;3016]	168	1.08	2.58326	4.88889	1x100 double	100	TRUE	TRUE	[]	1825.88	1x100 double	1.1134	120	0.99	6.23455	7.22455	43.02
032421_S032	4430	40x water	4513	[126.500000000000,353.500000000000,85.5000000000000,44,25,12]	4513x3 double	4513x1 uint16	[151.846012183029,367.012891344383,91.5050290409406]	4004.22	23040	631x2 double	631	1x100 double	1x100 double	2996	1806.59	[284.424443129545,27.0067759729725,84.3666278559295]	29x1 uint16	176	1.10314	2.75906	5.2561	1x100 double	100	TRUE	TRUE	[]	2787.19	1x100 double	0.39738	91	1.68442	3.21529	4.89972	32.58
032421_S032	4430	40x water	6238	[122.500000000000,844.500000000000,115.500000000000,120,27,9]	6238x3 double	6238x1 uint16	[178.839350649351,862.545779220779,120.092207792208]	6319.97	35840	1284x2 double	1284	1x100 double	1x100 double	2758	2575	[78.0058252427184,273,112]	[2461;2758;2506]	187	1.03371	0.853327	5.24224	1x100 double	100	TRUE	FALSE	[]	4358.38	1x100 double	0.577768	120	1.09324	2.10319	3.19643	43.02
032421_S032	4430	40x water	2281	[196.500000000000,92.5000000000000,54.5000000000000,21,24,11]	2281x3 double	2281x1 uint16	[207.335203366059,104.881252921926,59.9144460028051]	4801.26	25600	318x2 double	318	1x100 double	1x100 double	2752	1455.66	[92.4999550579111,330.808257787822,56.7008782968232]	107x1 uint16	189	1.00515	1.41371	4.54359	1x100 double	100	TRUE	TRUE	[]	3171.82	1x100 double	0.482234	57	0.490909	4.5	4.99091	20.34
032421_S032	4430	40x water	5763	[57.5000000000000,320.500000000000,278.500000000000,54,28,13]	5763x3 double	5763x1 uint16	[79.9216630548198,334.655750862830,286.635444257164]	5534.45	30720	938x2 double	938	1x62 double	1x62 double	1686	1142.16	[130.333295675996,60.6699522693253,269.377947863417]	31x1 uint16	272	1.26677	2.44473	4.17677	1x62 double	62	TRUE	TRUE	[]	3820.9	1x62 double	0.655714	287	0.652759	1.29385	1.9466	103.14
032421_S032	4430	40x water	1546	[145.500000000000,19.5000000000000,175.500000000000,19,19,11]	1546x3 double	1546x1 uint16	[154.952212389381,28.1017699115044,180.588053097345]	3742.3	25600	243x2 double	243	1x100 double	1x100 double	1471	1012.55	[274.599389477465,502.379870712875,165.676512838930]	11x1 uint16	294	1.09524	1.82296	4.00395	1x100 double	100	TRUE	TRUE	[]	2243.95	1x100 double	0.788732	179	0.793846	6.01714	6.81099	64.26
032421_S032	4430	40x water	109581	[39.5000000000000,818.500000000000,290.500000000000,260,79,23]	109581x3 double	109581x1 uint16	[197.423097808545,865.967749040218,302.518901348442]	6152.1	53760	10849x2 double	10849	1x46 double	1x46 double	1117	639.429	[190.435284480191,8.05071492403932,277.314715519809]	21x1 uint16	317	1.00518	6.83312	3.20797	1x46 double	46	TRUE	TRUE	[]	3695.71	1x46 double	0.757438	309	3.94171	4.59995	8.54166	111.06
032421_S032	4430	40x water	1030	[31.5000000000000,912.500000000000,99.5000000000000,18,13,8]	1030x3 double	1030x1 uint16	[40.6208434712084,919.121248986212,103.216139497161]	6129.09	28160	184x2 double	184	1x100 double	1x100 double	1111	551.688	[154.559533250255,214.642347343378,98.1733318228164]	16x1 uint16	318	1.09028	0.613442	4.69427	1x100 double	100	TRUE	TRUE	[]	4076.52	1x100 double	0.52901	102	0.585437	1.72059	2.30603	36.54
032421_S032	4430	40x water	1263	[89.5000000000000,268.500000000000,109.500000000000,37,48,7]	1263x3 double	1263x1 uint16	[111.031339775398,294.069208670671,112.858187516323]	7761.08	40960	449x2 double	449	1x100 double	1x100 double	1049	1049	[198,221,105]	1049	324	1.10782	1.61535	4.11922	1x100 double	100	TRUE	TRUE	[]	5946.73	1x100 double	0.408437	113	0.728182	0.778378	1.50656	40.5
032421_S032	4430	40x water	8803	[0.500000000000000,17.5000000000000,134.500000000000,38,54,14]	8803x3 double	8803x1 uint16	[9.94789116274773,48.0290571441770,141.659398530974]	6295.16	43520	939x2 double	939	1x100 double	1x100 double	918	849	[124.487043580683,131.020023557126,131]	[918;824;756;898]	331	1.01146	4.61044	6.3187	1x100 double	100	TRUE	TRUE	[]	3257.93	1x100 double	0.994142	142	1.75896	10.3816	12.1406	50.94
032421_S032	4430	40x water	682	[15.5000000000000,486.500000000000,145.500000000000,15,18,10]	682x3 double	682x1 uint16	[24.2378459237098,497.526551982049,149.803290949888]	5018.65	33280	138x2 double	138	1x100 double	1x100 double	813	813	[244,243,134]	813	343	1.10667	2.5414	3.63855	1x100 double	100	TRUE	TRUE	[]	2968.12	1x100 double	0.6375	148	0.495	2.46857	2.96357	53.1
032421_S032	4430	40x water	82	[293.500000000000,212.500000000000,212.500000000000,6,8,4]	82x3 double	82x1 uint16	[296.698113207547,215.849056603774,214.490566037736]	3309.27	17920	31x2 double	31	1x100 double	1x100 double	730	730	[294,49,207]	730	347	1.06977	3.51163	5.47826	1x100 double	100	TRUE	TRUE	[]	1486.45	1x100 double	4.5	231	2.73375	3.828	6.56175	82.98
032421_S032	4430	40x water	1756	[4.50000000000000,542.500000000000,259.500000000000,30,12,13]	1756x3 double	1756x1 uint16	[18.6104932991161,549.755346449957,265.459081836327]	5112.71	30720	249x2 double	249	1x84 double	1x84 double	660	660	[9,417,252]	660	351	1.15686	6.11406	3.24859	1x84 double	84	TRUE	TRUE	[]	3289.96	1x84 double	0.6375	269	2.91877	12.3916	15.3103	96.66
032421_S032	4430	40x water	4530	[100.500000000000,660.500000000000,54.5000000000000,65,15,14]	4530x3 double	4530x1 uint16	[133.703412406444,668.475960928580,61.1455029810986]	4454.85	25600	620x2 double	620	1x100 double	1x100 double	578	466.75	[275,185.878414568827,54.5886448848420]	[474;294;521;578]	357	1.01533	9.56507	4.53208	1x100 double	100	TRUE	TRUE	[]	3216.52	1x100 double	0.445443	78	7.509	5.89579	13.4048	27.9

## Sheet: Averaged per recording_N30
Recording	Mice	Gender	Age	Imaging	numEvents	frequency (Hz)	amp (df/F0)	Area	Area2D (pixel)	Half Rise Time (s)	Half Decay Time (s)	FWHM	AmpxArea	AmpxArea2D	Total Area2D (pixel)	Total Area (pixel)	Mitochondria area (pixel)	2D area ratio
081020_S015	4298	Female	4 month	40x Water 2.78Hz	6	0.0502008	0.555103	6335.33	751.833	1.22628	6.78592	8.0122	3516.76	417.345	4511	38012	129103	0.0349411
081020_S019	4298	Female	4 month	40x Water 2.78Hz	5	0.041834	0.462773	4432.8	590	1.61165	6.32144	7.93308	2051.38	273.036	2950	22164	138073	0.0213655
081020_S023	4298	Female	4 month	40x Water 2.78Hz	10	0.083668	1.43855	5747.4	601.9	1.30333	5.0834	6.38674	8267.9	865.861	6019	57474	113222	0.053161
081020_S026	4298	Female	4 month	40x Water 2.78Hz	5	0.041834	0.5113	2398.8	303	1.19543	7.65371	8.84914	1226.51	154.924	1515	11994	129910	0.0116619
081020_S031	4298	Female	4 month	40x Water 2.78Hz	5	0.041834	0.862461	1691.6	322.4	2.00636	6.84716	8.85353	1458.94	278.058	1612	8458	101308	0.0159119
081020_S039	4298	Female	4 month	40x Water 2.78Hz	5	0.041834	0.818856	3803	605	1.26424	5.75185	7.01609	3114.11	495.408	3025	19015	122430	0.024708
081020_S050	4298	Female	4 month	40x Water 2.78Hz	7	0.0585676	0.555516	4459	581.286	1.37531	8.75046	10.1258	2477.05	322.914	4069	31213	120218	0.0338468
090120_S008	4296	Female	4 month	40x Water 2.78Hz	15	0.125502	0.566145	1243.8	159.733	1.90246	2.50623	4.40869	704.171	90.4322	2396	18657	132023	0.0181484
090120_S035	4296	Female	4 month	40x Water 2.78Hz	13	0.108768	0.738565	6432.31	908.154	1.58014	3.62445	5.20459	4750.68	670.731	11806	83620	145175	0.0813225
090120_S032	4296	Female	4 month	40x Water 2.78Hz	4	0.0334672	0.426277	3563	595	1.30632	4.82733	6.13365	1518.83	253.635	2380	14252	139145	0.0171045
092220_S004	4335	Male	5 month	40x Water 2.78Hz	11	0.0920348	0.634167	1205.45	180.182	2.05964	4.55889	6.61854	764.46	114.265	1982	13260	140536	0.0141031
092220_S009	4335	Male	5 month	40x Water 2.78Hz	10	0.083668	0.72923	1202.4	197.4	1.62725	5.09182	6.71907	876.826	143.95	1974	12024	137683	0.0143373
092220_S019	4335	Male	5 month	40x Water 2.78Hz	15	0.125502	1.03762	1002.6	155.267	1.57336	4.61901	6.19236	1040.32	161.108	2329	15039	116800	0.0199401
092220_S021	4335	Male	5 month	40x Water 2.78Hz	13	0.108768	0.94818	3134.54	430.308	1.75765	3.77452	5.53217	2972.11	408.009	5594	40749	119371	0.0468623
110520_S011	4392	Male	5 month	40x Water 2.78Hz	9	0.0753012	0.828892	6867.22	923.333	1.70208	3.12519	4.82727	5692.19	765.344	8310	61805	133816	0.0621002
110520_S014	4392	Male	5 month	40x Water 2.78Hz	16	0.133869	0.797221	8092.81	915	1.92431	8.60501	10.5293	6451.76	729.457	14640	129485	133266	0.109855
110520_S029	4392	Male	5 month	40x Water 2.78Hz	14	0.117135	0.558041	3406.29	468	1.22857	4.46217	5.69074	1900.85	261.163	6552	47688	134379	0.0487576
110520_S015	4392	Male	5 month	40x Water 2.78Hz	15	0.125502	0.633535	2969.53	421.8	1.53803	5.62235	7.16038	1881.3	267.225	6327	44543	129511	0.048853

## Sheet: Individual mitoflash_N30
Recording	Mice	Imaging	Area								Area 2D (pixel)							ID					Length						amp (df/F0)	PeakFrame	Half Rise Time	Half Decay Time	FWHM	Peak Time
081020_S015	4298	40x Water 2.78Hz	7147	[49.5000000000000,665.500000000000,65.5000000000000,42,27,14]	7147x3 double	7147x1 uint16	[72.9275611620795,677.397617227319,72.3067660550459]	5622.19	38400	755x2 double	755	1x95 double	1x95 double	10103	4385.95	[31.6384883250871,673.578644130593,66.6309148004731]	304x1 uint16	27	1.08446	6.62776	5.28349	1x95 double	95	TRUE	TRUE	[]	3624.69	1x95 double	0.563143	76	3.01743	12.144	15.1614	27.18
081020_S015	4298	40x Water 2.78Hz	3188	[18.5000000000000,972.500000000000,130.500000000000,52,24,11]	3188x3 double	3188x1 uint16	[50.2701982835158,983.076945841965,135.180526783072]	5426.75	46080	640x2 double	640	1x95 double	1x95 double	9725	2517.28	[71.4567637870718,904.027546758809,130.202180113450]	1146x1 uint16	32	1.33636	1.86967	3.60204	1x95 double	95	TRUE	TRUE	[]	3892	1x95 double	0.391572	135	0.817273	1.64796	2.46523	48.42
081020_S015	4298	40x Water 2.78Hz	3148	[113.500000000000,923.500000000000,20.5000000000000,36,22,10]	3148x3 double	3148x1 uint16	[134.063926272674,935.423054417788,24.7188414277355]	5559.14	28160	590x2 double	590	1x95 double	1x95 double	7870	3629.61	[295.596075753764,482.274781087912,20.3474682861969]	69x1 uint16	51	1.04981	1.05479	4.36861	1x95 double	95	TRUE	FALSE	[]	4048.27	1x95 double	0.353698	23	0.634737	3.48	4.11474	8.1
081020_S015	4298	40x Water 2.78Hz	21550	[261.500000000000,333.500000000000,149.500000000000,39,72,17]	21550x3 double	21550x1 uint16	[282.917531338467,369.851745521061,158.235654363058]	5974.2	65535	2031x2 double	2031	1x95 double	1x95 double	6779	2636.21	[141.305169868505,718.613257564648,149.551108178130]	776x1 uint16	66	1.00313	7.27812	5.84333	1x95 double	95	TRUE	TRUE	[]	3362.91	1x95 double	0.763118	158	1.54399	15.4029	16.9468	56.7
081020_S015	4298	40x Water 2.78Hz	1379	[231.500000000000,923.500000000000,188.500000000000,32,15,8]	1379x3 double	1379x1 uint16	[248.147470124587,931.023646071701,192.767353165523]	7301.29	33280	337x2 double	337	1x95 double	1x95 double	3501	1879.09	[196.495584640202,492.709750378341,182.066089038932]	32x1 uint16	172	1.5	1.21954	3.91419	1x95 double	95	TRUE	TRUE	[]	5287.12	1x95 double	0.474138	192	0.72	1.61798	2.33798	68.94
081020_S015	4298	40x Water 2.78Hz	1600	[158.500000000000,987.500000000000,242.500000000000,18,10,15]	1600x3 double	1600x1 uint16	[168.271124341653,991.895351499886,250.463247080376]	6987.2	40960	158x2 double	158	1x95 double	1x95 double	1834	1271.67	[34.7937090432503,989.480733944954,230]	[787;1194;1834]	325	1.4375	3.21476	3.64348	1x95 double	95	TRUE	TRUE	[]	4520.51	1x95 double	0.784946	252	0.624255	6.42273	7.04698	90.54
081020_S019	4298	40x Water 2.78Hz	3614	[37.5000000000000,982.500000000000,274.500000000000,35,33,13]	3614x3 double	3614x1 uint16	[61.5450661774626,999.145967289712,280.450096033036]	12767.8	65535	536x2 double	536	1x69 double	1x69 double	3566	1435.89	[226.770464042226,185.341741807785,265.763301810718]	95x1 uint16	179	1.0191	0.938253	5.04531	1x69 double	69	TRUE	TRUE	[]	8678.21	1x69 double	0.389653	279	0.846053	3.82689	4.67294	100.26
081020_S019	4298	40x Water 2.78Hz	12287	[41.5000000000000,811.500000000000,288.500000000000,81,40,16]	12287x3 double	12287x1 uint16	[61.9922924786225,829.081292536793,296.011837589436]	7163.5	43520	1454x2 double	1454	1x53 double	1x53 double	1640	1409.25	[95.4763171899947,500.448997693809,277]	[1640;1312;1466;1219]	374	1.02004	28.2053	3.4345	1x53 double	53	TRUE	TRUE	[]	4500.25	1x53 double	0.530516	297	2.10772	12.5345	14.6423	106.74
081020_S019	4298	40x Water 2.78Hz	957	[258.500000000000,979.500000000000,146.500000000000,10,17,12]	957x3 double	957x1 uint16	[263.796217676573,987.767657275183,152.262446931687]	6930.99	33280	132x2 double	132	1x95 double	1x95 double	1397	1150	[11.9347826086957,726,141]	[1139;1397;914]	410	1.02041	3.86969	5.59	1x95 double	95	TRUE	TRUE	[]	4538.18	1x95 double	0.581197	154	2.10649	4.464	6.57049	55.26
081020_S019	4298	40x Water 2.78Hz	3785	[235.500000000000,930.500000000000,73.5000000000000,36,26,12]	3785x3 double	3785x1 uint16	[254.480188771999,947.419722741127,78.7185134205093]	6879.2	56320	614x2 double	614	1x95 double	1x95 double	1313	957.75	[151.347298355521,833.005612111720,71.3475593839729]	[889;823;1313;866;1108;989;906;768]	425	1.01375	3.52685	5.49492	1x95 double	95	TRUE	TRUE	[]	4590.49	1x95 double	0.415985	79	1.34643	7.1113	8.45774	28.26
081020_S019	4298	40x Water 2.78Hz	1521	[51.5000000000000,766.500000000000,100.500000000000,16,17,14]	1521x3 double	1521x1 uint16	[59.2606510814944,775.127157526764,106.873716408128]	7703.56	33280	214x2 double	214	1x95 double	1x95 double	956	879.5	[138.456509380330,472,96]	[956;803]	492	1.22222	4.35314	4.57343	1x95 double	95	TRUE	TRUE	[]	5490.84	1x95 double	0.396514	109	1.65155	3.67043	5.32198	39.06
081020_S023	4298	40x Water 2.78Hz	115	[168.500000000000,398.500000000000,135.500000000000,6,6,6]	115x3 double	115x1 uint16	[171.141538461538,401.255384615385,138.203076923077]	7234.78	17920	30x2 double	30	1x95 double	1x95 double	1709	468.708	[14.9493224410367,340.624185358240,128.894621083892]	421x1 uint16	12	1.41558	2.19403	3.87156	1x95 double	95	TRUE	FALSE	[]	4437.33	1x95 double	3.15385	174	2.18	4.32	6.5	62.46
081020_S023	4298	40x Water 2.78Hz	50607	[131.500000000000,324.500000000000,164.500000000000,71,134,17]	50607x3 double	50607x1 uint16	[164.356263341077,398.615823327362,173.547111669538]	7367.93	65535	4910x2 double	4910	1x95 double	1x95 double	1361	428.753	[290.859614675316,889.967056475234,163.631930311775]	1075x1 uint16	16	1.0454	3.82583	6.1943	1x95 double	95	TRUE	FALSE	[]	3952.1	1x95 double	0.856016	175	2.32279	9.6032	11.926	62.82
081020_S023	4298	40x Water 2.78Hz	1750	[145.500000000000,433.500000000000,79.5000000000000,19,13,15]	1750x3 double	1750x1 uint16	[156.152223489168,438.925028506271,87.2092360319270]	5131.7	38400	181x2 double	181	1x95 double	1x95 double	1172	330.63	[9.40826745002081,916.805921113920,78.5550966668116]	487x1 uint16	19	1.09375	4.5545	5.29286	1x95 double	95	TRUE	TRUE	[]	3649.06	1x95 double	0.507752	89	0.940909	1.65789	2.5988	31.86
081020_S023	4298	40x Water 2.78Hz	31	[169.500000000000,423.500000000000,138.500000000000,5,3,3]	31x3 double	31x1 uint16	[171.728571428571,425.014285714286,140.042857142857]	5780.65	15360	12x2 double	12	1x95 double	1x95 double	660	214.153	[294.112361041097,1013.51633015839,130.450611551829]	176x1 uint16	46	1.09091	4.51882	4.75	1x95 double	95	TRUE	TRUE	[]	3413.33	1x95 double	2.1875	177	0.68625	2.106	2.79225	63.54
081020_S023	4298	40x Water 2.78Hz	142	[250.500000000000,351.500000000000,127.500000000000,6,8,7]	142x3 double	142x1 uint16	[253.643617021277,355.103723404255,130.223404255319]	6778.59	25600	37x2 double	37	1x95 double	1x95 double	587	285.273	[21.3488800874078,221.703883274151,121.239711372121]	154x1 uint16	52	1.33333	15.8611	-1.69118	1x95 double	95	TRUE	TRUE	[]	5742.7	1x95 double	1.0241	171	0.332609	2.15308	2.48569	61.38
081020_S023	4298	40x Water 2.78Hz	487	[157.500000000000,383.500000000000,134.500000000000,11,13,8]	487x3 double	487x1 uint16	[163.160112359551,388.929775280899,138.714887640449]	7485.5	25600	109x2 double	109	1x95 double	1x95 double	487	167.356	[284.203385169258,747.312865643282,127.250687534377]	239x1 uint16	65	1.07023	4.105	5.57812	1x95 double	95	TRUE	FALSE	[]	5448.81	1x95 double	2.18966	176	2.95338	7.905	10.8584	63.18
081020_S023	4298	40x Water 2.78Hz	1077	[222.500000000000,890.500000000000,48.5000000000000,13,21,9]	1077x3 double	1077x1 uint16	[228.587789305666,898.832801276935,52.9177972865124]	5956.69	33280	196x2 double	196	1x95 double	1x95 double	339	158.847	[252.844831103728,24.5414007169712,50.1598904141529]	216x1 uint16	89	1.50476	1.9797	2.81013	1x95 double	95	TRUE	TRUE	[]	3892.24	1x95 double	0.624161	51	0.24438	2.00571	2.25009	18.18
081020_S023	4298	40x Water 2.78Hz	565	[158.500000000000,410.500000000000,135.500000000000,14,26,7]	565x3 double	565x1 uint16	[164.165591397849,423.140501792115,138.573476702509]	6320.71	25600	176x2 double	176	1x95 double	1x95 double	307	116.407	[8.50763601654470,956.744988864143,130.295895641107]	54x1 uint16	95	1.14021	1.96308	5.31721	1x95 double	95	TRUE	TRUE	[]	5440	1x95 double	2.25027	174	1.73257	9.486	11.2186	62.46
081020_S023	4298	40x Water 2.78Hz	2651	[129.500000000000,977.500000000000,158.500000000000,36,13,13]	2651x3 double	2651x1 uint16	[146.347049106472,984.861540771888,164.638534314462]	6430.42	35840	338x2 double	338	1x95 double	1x95 double	115	93	[12.3824884792627,160.407066052227,145.411674347158]	[115;91;91;86;108;88;72]	160	1.06015	7.54906	5.39716	1x95 double	95	TRUE	TRUE	[]	4423.2	1x95 double	0.422945	164	1.39171	8.83714	10.2289	58.86
081020_S023	4298	40x Water 2.78Hz	49	[176.500000000000,346.500000000000,138.500000000000,7,10,3]	49x3 double	49x1 uint16	[178.977777777778,351.592592592593,139.711111111111]	7053.06	17920	30x2 double	30	1x95 double	1x95 double	94	55.4545	[294.873770491803,572.073770491803,128.393442622951]	11x1 uint16	177	1.07407	25.738	-2.03448	1x95 double	95	TRUE	TRUE	[]	5546.67	1x95 double	1.16923	183	0.248727	2.76	3.00873	65.7
081020_S026	4298	40x Water 2.78Hz	1467	[90.5000000000000,418.500000000000,201.500000000000,16,12,14]	1467x3 double	1467x1 uint16	[97.8747173224785,424.199457259159,208.483717774763]	7716.65	40960	154x2 double	154	1x95 double	1x95 double	5331	1052.94	[255.348982322444,91.1640466978321,196.704166521264]	2150x1 uint16	13	1.16901	8.12752	3.45783	1x95 double	95	TRUE	TRUE	[]	5169.87	1x95 double	0.543408	208	1.28667	10.06	11.3467	74.7
081020_S026	4298	40x Water 2.78Hz	599	[110.500000000000,799.500000000000,226.500000000000,22,10,6]	599x3 double	599x1 uint16	[118.554545454545,805.346464646465,229.427777777778]	8462.1	35840	156x2 double	156	1x95 double	1x95 double	1191	573.475	[259.176233491510,173.207478131611,208.647847464410]	61x1 uint16	87	1.07087	2.63689	4.36765	1x95 double	95	TRUE	TRUE	[]	6449.23	1x95 double	0.310433	229	0.812432	0.585542	1.39797	82.26
081020_S026	4298	40x Water 2.78Hz	4542	[176.500000000000,946.500000000000,120.500000000000,39,16,14]	4542x3 double	4542x1 uint16	[198.373947533227,953.596409435669,127.952264978081]	8099.9	51200	469x2 double	469	1x95 double	1x95 double	856	488.145	[261.900842557410,986.365769040145,110.359491161408]	62x1 uint16	116	1.0456	5.00715	3.36449	1x95 double	95	TRUE	TRUE	[]	5283.75	1x95 double	0.566116	125	0.515798	9.5328	10.0486	44.82
081020_S026	4298	40x Water 2.78Hz	3587	[76.5000000000000,19.5000000000000,43.5000000000000,42,15,13]	3587x3 double	3587x1 uint16	[95.9808903597737,27.7577666275222,49.9606063841144]	6685.12	25600	442x2 double	442	1x95 double	1x95 double	551	319.754	[143.878195983759,49.7165038955339,43.1063316141776]	57x1 uint16	152	1.04464	4.22322	6.34188	1x95 double	95	TRUE	TRUE	[]	4523.44	1x95 double	0.457106	49	1.23028	6.71023	7.94051	17.46
081020_S026	4298	40x Water 2.78Hz	1799	[60.5000000000000,906.500000000000,95.5000000000000,20,18,9]	1799x3 double	1799x1 uint16	[71.7374138291205,915.773971171924,99.6743263003969]	6811.96	30720	294x2 double	294	1x95 double	1x95 double	523	424.533	[124.012091708543,611.003768844221,91.9915201005025]	15x1 uint16	159	1.08276	4.12128	5.63694	1x95 double	95	TRUE	TRUE	[]	4318.91	1x95 double	0.679435	114	2.13197	11.38	13.512	40.86
081020_S031	4298	40x Water 2.78Hz	2657	[88.5000000000000,552.500000000000,163.500000000000,42,19,14]	2657x3 double	2657x1 uint16	[110.877442328310,561.022198957654,170.021376626344]	5662.87	30730	417x2 double	417	1x95 double	1x95 double	10745	2719.23	[294.611730094064,692.052597908802,167.708471479219]	192x1 uint16	9	1.14734	4.69759	5.83364	1x95 double	95	TRUE	TRUE	[]	3032.53	1x95 double	0.861565	173	2.62825	12.4576	15.0859	62.1
081020_S031	4298	40x Water 2.78Hz	1489	[165.500000000000,516.500000000000,162.500000000000,15,17,13]	1489x3 double	1489x1 uint16	[173.790750781563,526.849162967225,169.264357786275]	7220.85	30731	169x2 double	169	1x95 double	1x95 double	6009	2228.04	[10.8142948387558,945.237075927922,166.463624190203]	182x1 uint16	15	1.03397	3.39187	5.40753	1x95 double	95	TRUE	TRUE	[]	3989.91	1x95 double	0.966394	174	3.21704	7.89371	11.1107	62.46
081020_S031	4298	40x Water 2.78Hz	588	[179.500000000000,180.500000000000,19.5000000000000,22,31,3]	588x3 double	588x1 uint16	[190.990550240504,196.184712774451,20.3278377578353]	18103.6	61435	422x2 double	422	1x95 double	1x95 double	3997	1409.59	[191.409171360973,196.409763754447,20.1910595638971]	588x1 uint16	20	1.05905	3.2959	6.40441	1x95 double	95	TRUE	TRUE	[]	9608.92	1x95 double	0.865739	18	2.02084	3.11563	5.13647	6.3
081020_S031	4298	40x Water 2.78Hz	3494	[7.50000000000000,1002.50000000000,186.500000000000,44,22,22]	3494x3 double	3494x1 uint16	[31.4376735946638,1016.80527489224,199.937025521629]	4175.12	28159	516x2 double	516	1x95 double	1x95 double	1465	1098.67	[282.602851941748,295.269417475728,186.577669902913]	[1153;1026;605;1465;1172;1171]	32	1.13037	3.70159	5.1511	1x95 double	95	TRUE	TRUE	[]	1997.45	1x95 double	1.07043	202	1.42507	9.34457	10.7696	72.54
081020_S031	4298	40x Water 2.78Hz	230	[199.500000000000,218.500000000000,297.500000000000,14,11,5]	230x3 double	230x1 uint16	[208.059236299023,222.346307926897,300.183507507471]	10005.4	28164	88x2 double	88	1x49 double	1x49 double	701	648.5	[277.459521973786,489,297]	[701;596]	41	1.06945	4.86807	2.79932	1x49 double	49	TRUE	TRUE	[]	6405.91	1x49 double	0.548182	299	0.740637	1.42428	2.16492	107.46
081020_S039	4298	40x Water 2.78Hz	14581	[156.500000000000,780.500000000000,68.5000000000000,57,64,13]	14581x3 double	14581x1 uint16	[195.786103511430,814.809211567595,75.0234246048794]	7764.98	51200	2058x2 double	2058	1x95 double	1x95 double	4409	2238.18	[294.232372055240,582.519740048741,63.6059301380991]	22x1 uint16	55	1.00722	1.94381	5.6544	1x95 double	95	TRUE	TRUE	[]	4748.07	1x95 double	0.586586	74	0.922463	6.99266	7.91512	26.46
081020_S039	4298	40x Water 2.78Hz	94	[197.500000000000,815.500000000000,49.5000000000000,6,8,3]	94x3 double	94x1 uint16	[200.333333333333,819.621212121212,51.1085858585859]	10784.7	25600	38x2 double	38	1x95 double	1x95 double	4157	1839.38	[291.572636176267,785.550085637831,51.1895480957508]	359x1 uint16	58	1.125	3.64373	5.48413	1x95 double	95	TRUE	TRUE	[]	8151.58	1x95 double	1.3719	77	2.22545	4.32	6.54545	27.54
081020_S039	4298	40x Water 2.78Hz	2383	[98.5000000000000,806.500000000000,70.5000000000000,33,34,10]	2383x3 double	2383x1 uint16	[119.340416305291,826.440372940156,74.9809193408500]	4954.56	28160	504x2 double	504	1x95 double	1x95 double	3946	2053.19	[287.801712002028,409.095254298353,67.7162720255132]	73x1 uint16	59	1.09441	2.50059	5.84984	1x95 double	95	TRUE	TRUE	[]	3596.19	1x95 double	0.416667	75	1.2743	4.59659	5.87089	26.82
081020_S039	4298	40x Water 2.78Hz	1775	[103.500000000000,807.500000000000,46.5000000000000,25,33,10]	1775x3 double	1775x1 uint16	[120.180206318504,825.762733720181,51.8745970341715]	4473.87	25600	367x2 double	367	1x95 double	1x95 double	2641	1521.63	[16.7687452239034,404.986703347089,45.1471190585358]	43x1 uint16	83	1.14573	2.77638	5.67544	1x95 double	95	TRUE	TRUE	[]	3145.94	1x95 double	0.738359	75	1.42565	7.51	8.93565	26.82
081020_S039	4298	40x Water 2.78Hz	182	[201.500000000000,827.500000000000,50.5000000000000,9,11,5]	182x3 double	182x1 uint16	[206.684210526316,833.962648556876,52.6078098471986]	8284.84	23040	58x2 double	58	1x95 double	1x95 double	1047	825.625	[41.3586676760030,247.348675246026,48]	[738;804;1047;783;987;830;726;690]	135	1.17822	2.04251	4.02521	1x95 double	95	TRUE	TRUE	[]	6885.52	1x95 double	0.980769	73	0.473333	5.34	5.81333	26.1
081020_S050	4298	40x Water 2.78Hz	949	[44.5000000000000,486.500000000000,65.5000000000000,20,14,8]	949x3 double	949x1 uint16	[56.5935711140467,494.664464993395,69.2338177014531]	6126.2	40960	185x2 double	185	1x95 double	1x95 double	1993	766.167	[7.68009571459648,7.39099412660431,64.8081357407005]	30x1 uint16	7	1.20455	2.33696	3.84277	1x95 double	95	TRUE	TRUE	[]	4220.54	1x95 double	0.908197	89	0.918571	7.45579	8.37436	31.86
081020_S050	4298	40x Water 2.78Hz	6668	[264.500000000000,904.500000000000,118.500000000000,36,32,13]	6668x3 double	6668x1 uint16	[283.330860236615,919.007619811510,125.230298776820]	3829.25	23040	711x2 double	711	1x95 double	1x95 double	816	225.188	[31.0165943522869,450.672919263592,113.027237750503]	741x1 uint16	24	1.02956	7.15208	5.55024	1x95 double	95	TRUE	TRUE	[]	2300.76	1x95 double	0.643192	130	3.47786	8.61453	12.0924	46.62
081020_S050	4298	40x Water 2.78Hz	9041	[104.500000000000,183.500000000000,131.500000000000,34,52,16]	9041x3 double	9041x1 uint16	[123.006369426752,212.928629756655,138.799281398008]	5201.27	40960	1075x2 double	1075	1x95 double	1x95 double	483	166.362	[6.50595916675303,667.630117110581,121.787231837496]	58x1 uint16	44	1.61594	2.39531	3.79148	1x95 double	95	TRUE	TRUE	[]	3629.25	1x95 double	0.50853	140	1.22063	8.7975	10.0181	50.22
081020_S050	4298	40x Water 2.78Hz	6331	[124.500000000000,837.500000000000,157.500000000000,38,34,14]	6331x3 double	6331x1 uint16	[144.830315845117,853.845843795428,163.534293643452]	6119.58	46080	892x2 double	892	1x95 double	1x95 double	275	107.435	[9.32517199514367,817.115944961554,145.602387697289]	46x1 uint16	73	1.06957	25.5424	0.495935	1x95 double	95	TRUE	TRUE	[]	4474.26	1x95 double	0.381655	161	0.470337	17.1883	17.6587	57.78
081020_S050	4298	40x Water 2.78Hz	1236	[44.5000000000000,485.500000000000,85.5000000000000,20,15,10]	1236x3 double	1236x1 uint16	[55.8387721238938,494.982853982301,90.1377212389381]	7489.45	38400	205x2 double	205	1x95 double	1x95 double	238	118.885	[21.8515043675186,161.912326108056,82.3335490132643]	26x1 uint16	79	1.38525	2.35516	3.69231	1x95 double	95	TRUE	TRUE	[]	5394.73	1x95 double	0.472222	89	0.79814	1.36125	2.15939	31.86
081020_S050	4298	40x Water 2.78Hz	5397	[231.500000000000,981.500000000000,151.500000000000,57,26,14]	5397x3 double	5397x1 uint16	[254.907978631742,997.205324831984,157.987247975185]	5505.16	28160	712x2 double	712	1x95 double	1x95 double	123	62.2986	[56.3286144242559,14.1326496488686,144.326496488686]	144x1 uint16	134	1.05285	6.9667	3.94595	1x95 double	95	TRUE	TRUE	[]	3793.26	1x95 double	0.44455	157	1.25482	7.52523	8.78005	56.34
081020_S050	4298	40x Water 2.78Hz	1591	[114.500000000000,144.500000000000,134.500000000000,20,31,12]	1591x3 double	1591x1 uint16	[124.904716682494,163.109844887623,140.880658436214]	5082.99	25600	289x2 double	289	1x95 double	1x95 double	67	40.1	[286.326683291771,69.4488778054863,121.825436408978]	[41;29;25;30;67;57;25;52;47;28]	185	1.30928	3.23794	3.80315	1x95 double	95	TRUE	TRUE	[]	3658.41	1x95 double	0.530266	142	1.4868	10.3106	11.7974	50.94
090120_S008	4296	40x Water 2.78Hz	1717	[20.5000000000000,2.50000000000000,68.5000000000000,15,16,15]	1717x3 double	1717x1 uint16	[29.1237125977559,9.94853832137003,76.2593875801417]	5094.45	35795	168x2 double	168	1x100 double	1x100 double	65535	21276	[27.6522880153190,10.0198776280410,75.5124304568530]	1717x1 uint16	1	1.26035	3.90932	3.67804	1x100 double	100	TRUE	TRUE	[]	3438.4	1x100 double	0.641881	79	1.58325	1.76356	3.34681	28.26
090120_S008	4296	40x Water 2.78Hz	1426	[88.5000000000000,961.500000000000,67.5000000000000,11,16,13]	1426x3 double	1426x1 uint16	[93.9639367563237,968.911138245384,73.8049034243016]	6774.04	46080	156x2 double	156	1x100 double	1x100 double	64289	22135.6	[93.7682466773643,968.850975073100,73.2955601322297]	1426x1 uint16	3	1.05204	5.53571	4.03191	1x100 double	100	TRUE	TRUE	[]	3798.05	1x100 double	0.730074	88	6.67448	2.45307	9.12755	31.5
090120_S008	4296	40x Water 2.78Hz	2662	[38.5000000000000,893.500000000000,249.500000000000,25,17,15]	2662x3 double	2662x1 uint16	[50.4312359784737,903.092362330182,257.688072493602]	5374.87	38373	314x2 double	314	1x91 double	1x91 double	56566	17678.3	[51.9142420858589,901.693263776369,257.228291268016]	2662x1 uint16	4	1.17905	3.30152	4.60425	1x91 double	91	TRUE	TRUE	[]	3474.33	1x91 double	0.620157	261	2.26877	5.33737	7.60613	93.78
090120_S008	4296	40x Water 2.78Hz	1107	[203.500000000000,516.500000000000,110.500000000000,16,11,12]	1107x3 double	1107x1 uint16	[211.840795776559,522.448198148916,116.399967259602]	7719.98	38429	146x2 double	146	1x100 double	1x100 double	52789	17910.1	[211.699679903354,520.974189307731,116.214281059624]	1107x1 uint16	7	1.01567	4.34816	5.22404	1x100 double	100	TRUE	TRUE	[]	5706.48	1x100 double	0.496698	118	1.88609	5.62178	7.50787	42.3
090120_S008	4296	40x Water 2.78Hz	1444	[9.50000000000000,869.500000000000,58.5000000000000,18,19,12]	1444x3 double	1444x1 uint16	[20.1371942466559,879.115842624510,63.4641304106162]	5731.27	30784	236x2 double	236	1x100 double	1x100 double	49699	18289.4	[19.4249795994777,879.591768385925,63.3192333106764]	1444x1 uint16	8	1.03834	1.34126	3.68346	1x100 double	100	TRUE	TRUE	[]	4280.84	1x100 double	0.532201	62	0.566105	0.868617	1.43472	22.14
090120_S008	4296	40x Water 2.78Hz	1343	[166.500000000000,142.500000000000,213.500000000000,19,12,11]	1343x3 double	1343x1 uint16	[176.723395323615,149.754984024487,218.761216354917]	7385.88	33300	179x2 double	179	1x100 double	1x100 double	46073	15484	[176.387418819955,148.280612086157,218.711859270273]	1343x1 uint16	10	1.03675	2.85533	5.32097	1x100 double	100	TRUE	TRUE	[]	5367.09	1x100 double	0.449998	218	1.20407	3.16839	4.37247	78.3
090120_S008	4296	40x Water 2.78Hz	978	[116.500000000000,339.500000000000,59.5000000000000,17,10,12]	978x3 double	978x1 uint16	[124.430299695363,344.935234593356,66.7345320039704]	8857.97	43528	138x2 double	138	1x100 double	1x100 double	38749	15242.5	[124.510291350918,343.894695495016,66.5455648949788]	978x1 uint16	14	1.03559	1.94556	5.17639	1x100 double	100	TRUE	TRUE	[]	6143	1x100 double	0.485852	67	1.14015	2.60084	3.74099	23.94
090120_S008	4296	40x Water 2.78Hz	993	[177.500000000000,289.500000000000,46.5000000000000,16,11,13]	993x3 double	993x1 uint16	[184.893947280030,295.580292676112,52.9353086508159]	6862.88	33279	120x2 double	120	1x100 double	1x100 double	36904	14076.8	[185.121048020677,294.548696795436,53.4371386902796]	993x1 uint16	17	1.03282	3.35913	5.28429	1x100 double	100	TRUE	TRUE	[]	4482.83	1x100 double	0.618418	55	1.7079	3.19601	4.90391	19.62
090120_S008	4296	40x Water 2.78Hz	1366	[57.5000000000000,944.500000000000,268.500000000000,16,16,10]	1366x3 double	1366x1 uint16	[65.7059869825798,952.389598716093,273.963469220422]	7429.28	33288	204x2 double	204	1x75 double	1x75 double	35502	13568.3	[65.4443495750002,952.642747157248,273.996558208501]	1366x1 uint16	19	1.0112	2.40664	5.02145	1x75 double	75	TRUE	TRUE	[]	5149.95	1x75 double	0.370445	275	1.04474	0.92834	1.97308	98.82
090120_S008	4296	40x Water 2.78Hz	1122	[122.500000000000,600.500000000000,239.500000000000,20,10,11]	1122x3 double	1122x1 uint16	[131.629504333652,604.718568372338,244.920142907674]	8259.57	35793	168x2 double	168	1x100 double	1x100 double	33101	13421.5	[131.909428849499,605.751700924664,244.895839647442]	1122x1 uint16	24	1.0465	2.08028	5.20856	1x100 double	100	TRUE	TRUE	[]	6022.17	1x100 double	0.470966	246	1.207	1.98058	3.18758	88.38
090120_S008	4296	40x Water 2.78Hz	1147	[156.500000000000,262.500000000000,43.5000000000000,12,15,13]	1147x3 double	1147x1 uint16	[162.176180825240,269.126315518938,50.2122331040184]	8311.02	43568	137x2 double	137	1x100 double	1x100 double	31179	11390.3	[162.638469296326,270.159821864453,49.9872567655426]	1147x1 uint16	28	1.1265	7.69739	4.76021	1x100 double	100	TRUE	TRUE	[]	5588.61	1x100 double	0.524608	57	3.77223	2.6058	6.37804	20.34
090120_S008	4296	40x Water 2.78Hz	1327	[56.5000000000000,944.500000000000,109.500000000000,18,14,14]	1327x3 double	1327x1 uint16	[65.8232904099527,951.897019309464,116.663894941121]	6531.03	35817	164x2 double	164	1x100 double	1x100 double	30377	12499	[65.1547811311943,950.436051628318,117.104451003725]	1327x1 uint16	32	1.14116	3.61497	4.03998	1x100 double	100	TRUE	TRUE	[]	3329.83	1x100 double	0.894869	121	3.15778	0.970691	4.12847	43.38
090120_S008	4296	40x Water 2.78Hz	651	[98.5000000000000,609.500000000000,138.500000000000,11,12,9]	651x3 double	651x1 uint16	[104.587422341109,616.213306850354,142.473695194205]	8162.99	46085	107x2 double	107	1x100 double	1x100 double	24936	9204.4	[104.673119142359,614.895618156473,142.347525319727]	651x1 uint16	52	1.16498	2.95998	4.788	1x100 double	100	TRUE	TRUE	[]	6608.5	1x100 double	0.314182	143	0.247752	0.285689	0.533441	51.3
090120_S008	4296	40x Water 2.78Hz	860	[40.5000000000000,467.500000000000,141.500000000000,10,9,19]	860x3 double	860x1 uint16	[44.9139840087739,472.877985101018,151.555207427262]	9321.54	43539	79x2 double	79	1x100 double	1x100 double	22289	7157.65	[45.2960130483236,471.783735732457,152.112649985866]	860x1 uint16	62	1.27955	2.69214	5.32968	1x100 double	100	TRUE	TRUE	[]	5674.44	1x100 double	0.890163	157	1.72183	5.46732	7.18915	56.34
090120_S008	4296	40x Water 2.78Hz	514	[101.500000000000,630.500000000000,261.500000000000,9,11,9]	514x3 double	514x1 uint16	[105.669353914358,635.556644684951,266.079413681699]	8011.61	46061	80x2 double	80	1x83 double	1x83 double	21538	8322.25	[105.690628043446,636.717832334417,266.148943785279]	514x1 uint16	71	1.40333	3.27303	4.02235	1x83 double	83	TRUE	TRUE	[]	5735.07	1x83 double	0.451657	267	0.354766	0.345381	0.700148	95.94
090120_S035	4296	40x Water 2.78Hz	27793	[3.50000000000000,891.500000000000,19.5000000000000,47,129,103]	27793x3 double	27793x1 uint16	[22.5519783182014,925.067447384273,95.4313209419156]	3595.15	65532	2607x2 double	2607	1x100 double	1x100 double	65140	10060	[15.3454997272449,942.751707340673,82.6538870793774]	27793x1 uint16	2	1.05245	7.13682	5.86767	1x100 double	100	TRUE	TRUE	[]	1523.82	1x100 double	1.3683	97	2.2324	15.0867	17.3191	34.74
090120_S035	4296	40x Water 2.78Hz	9731	[28.5000000000000,888.500000000000,282.500000000000,57,50,13]	9731x3 double	9731x1 uint16	[56.2170948028950,910.157495468993,290.235375352199]	6683.02	38379	1779x2 double	1779	1x59 double	1x59 double	28703	6555.8	[293.866656170173,129.145071052359,287.227374302190]	497x1 uint16	10	1.02578	3.51716	2.2902	1x59 double	59	TRUE	TRUE	[]	4321.58	1x59 double	0.628402	288	0.175678	2.68517	2.86085	103.5
090120_S035	4296	40x Water 2.78Hz	39605	[1.50000000000000,657.500000000000,69.5000000000000,71,183,32]	39605x3 double	39605x1 uint16	[23.3446081869306,743.234506132687,93.0965480558574]	5962.52	51201	6122x2 double	6122	1x100 double	1x100 double	12238	4270.53	[4.89119960330032,797.162768082205,74.3968677254508]	85x1 uint16	40	1.09619	0.426164	4.75334	1x100 double	100	TRUE	TRUE	[]	3293.88	1x100 double	0.83033	92	0.750784	2.95166	3.70245	32.94
090120_S035	4296	40x Water 2.78Hz	461	[235.500000000000,28.5000000000000,241.500000000000,11,10,10]	461x3 double	461x1 uint16	[241.315445805009,33.1423642804337,245.825921890130]	8902.42	35858	79x2 double	79	1x100 double	1x100 double	7787	2926.56	[4.97151604614291,780.274520255864,243.174730741895]	25x1 uint16	63	1.11009	2.04914	4.60102	1x100 double	100	TRUE	TRUE	[]	5254.49	1x100 double	0.824418	245	0.974043	1.62376	2.5978	88.02
090120_S035	4296	40x Water 2.78Hz	413	[119.500000000000,578.500000000000,21.5000000000000,18,8,8]	413x3 double	413x1 uint16	[128.990689168378,582.863028319644,25.2747191869561]	7924.07	25621	91x2 double	91	1x100 double	1x100 double	6182	2185.62	[129.156536063927,582.337347021750,25.2406318651188]	413x1 uint16	82	1.34695	2.30792	5.02508	1x100 double	100	TRUE	TRUE	[]	4335.02	1x100 double	0.902691	26	1.28893	1.3027	2.59164	9.18
090120_S035	4296	40x Water 2.78Hz	666	[93.5000000000000,242.500000000000,114.500000000000,19,15,6]	666x3 double	666x1 uint16	[101.767905242761,251.877671810487,117.381454981294]	9141.36	28164	154x2 double	154	1x100 double	1x100 double	5292	2046.56	[24.2441936526200,240.585087518816,118.984868426238]	62x1 uint16	89	1.13712	2.80643	3.40954	1x100 double	100	TRUE	TRUE	[]	5936.28	1x100 double	0.548298	116	0.482525	2.07749	2.56001	41.58
090120_S035	4296	40x Water 2.78Hz	632	[209.500000000000,332.500000000000,228.500000000000,8,27,9]	632x3 double	632x1 uint16	[212.826171918381,346.703747781724,233.134637970541]	6981.34	25614	136x2 double	136	1x100 double	1x100 double	3294	1746.87	[35.3933749463324,492.182722899259,230.361152393848]	52x1 uint16	120	1.06953	4.74072	5.55993	1x100 double	100	TRUE	TRUE	[]	4406.81	1x100 double	0.636328	234	1.66946	1.55364	3.2231	84.06
090120_S035	4296	40x Water 2.78Hz	1410	[106.500000000000,273.500000000000,281.500000000000,24,18,12]	1410x3 double	1410x1 uint16	[119.456683842721,284.227343080075,288.951586424100]	6734.04	28164	255x2 double	255	1x60 double	1x60 double	2696	1249.21	[4.14832180227572,733.906169592315,283.367888386986]	14x1 uint16	131	1.16053	3.02287	5.01305	1x60 double	60	TRUE	TRUE	[]	3783.06	1x60 double	0.744359	290	1.42112	1.58781	3.00893	104.22
090120_S035	4296	40x Water 2.78Hz	451	[254.500000000000,567.500000000000,256.500000000000,15,12,11]	451x3 double	451x1 uint16	[263.888049571473,571.034391348664,262.944853647931]	6032.37	33297	104x2 double	104	1x86 double	1x86 double	1321	677.625	[31.5827338129496,605.074893931009,258.057185021214]	[600;604;976;209;1321;197;477;1037]	233	1.03364	4.07746	5.57925	1x86 double	86	TRUE	TRUE	[]	3551.42	1x86 double	0.554439	264	1.60237	2.31464	3.91701	94.86
090120_S035	4296	40x Water 2.78Hz	709	[215.500000000000,373.500000000000,62.5000000000000,13,11,13]	709x3 double	709x1 uint16	[222.566927827788,378.839942303159,69.6745239632785]	11385.8	33290	95x2 double	95	1x100 double	1x100 double	1249	893	[202.599104143337,1001.46280595105,63.4983202687570]	14x1 uint16	241	1.13263	5.9337	5.28929	1x100 double	100	TRUE	TRUE	[]	6793.85	1x100 double	0.784846	77	3.92344	7.04704	10.9705	27.54
090120_S035	4296	40x Water 2.78Hz	534	[142.500000000000,89.5000000000000,94.5000000000000,14,11,9]	534x3 double	534x1 uint16	[149.889522137466,94.5058080074262,99.4753220728902]	9279.78	33286	99x2 double	99	1x100 double	1x100 double	1139	853.333	[62.2550781250000,1003,95.7000000000000]	[768;1139;653]	252	1.03491	4.52137	4.82529	1x100 double	100	TRUE	TRUE	[]	5846.48	1x100 double	0.632398	101	1.96867	2.21109	4.17977	36.18
090120_S035	4296	40x Water 2.78Hz	422	[158.500000000000,643.500000000000,41.5000000000000,9,10,10]	422x3 double	422x1 uint16	[162.928693874672,648.479469512366,46.6781523702231]	9137.26	33283	69x2 double	69	1x100 double	1x100 double	1088	983	[144.553407934893,878,42]	[878;1088]	258	1.13891	4.98066	4.54856	1x100 double	100	TRUE	TRUE	[]	5715.75	1x100 double	0.76713	63	3.56167	5.2736	8.83526	22.5
090120_S035	4296	40x Water 2.78Hz	793	[139.500000000000,974.500000000000,76.5000000000000,29,14,8]	793x3 double	793x1 uint16	[152.469718862729,981.787832704988,79.6622438519451]	6788.05	28209	216x2 double	216	1x100 double	1x100 double	526	415.667	[134.421812349639,961,77.7522052927025]	[309;412;526]	326	1.07049	2.11761	3.76755	1x100 double	100	TRUE	TRUE	[]	4812.66	1x100 double	0.379413	78	0.490734	1.40249	1.89322	27.9
090120_S032	4296	40x Water 2.78Hz	6551	[239.500000000000,714.500000000000,134.500000000000,43,36,15]	6551x3 double	6551x1 uint16	[254.059567743119,731.137776936267,143.197983094228]	8231.44	48621	1053x2 double	1053	1x100 double	1x100 double	23701	6323.7	[254.301093010789,732.027253250757,142.622132490248]	6551x1 uint16	8	1.01892	6.98051	6.12029	1x100 double	100	TRUE	TRUE	[]	5138.76	1x100 double	0.409119	146	2.76389	7.94812	10.712	52.38
090120_S032	4296	40x Water 2.78Hz	1877	[236.500000000000,82.5000000000000,140.500000000000,14,25,16]	1877x3 double	1877x1 uint16	[244.153098970283,94.8883113455542,149.849788703229]	9600.63	43518	266x2 double	266	1x100 double	1x100 double	14459	4003.87	[243.734196261661,96.2840427540593,150.281173526462]	1877x1 uint16	15	1.16124	1.68518	5.26625	1x100 double	100	TRUE	TRUE	[]	6387.06	1x100 double	0.526852	151	1.07163	3.93381	5.00544	54.18
090120_S032	4296	40x Water 2.78Hz	3517	[4.50000000000000,45.5000000000000,204.500000000000,31,63,9]	3517x3 double	3517x1 uint16	[21.8723150560561,81.3817729619066,209.214810039580]	9396.81	56297	690x2 double	690	1x100 double	1x100 double	6305	2814.7	[6.05769663124062,684.829752332207,207.116206516580]	128x1 uint16	56	1.11772	0.581369	4.96224	1x100 double	100	TRUE	TRUE	[]	6050.24	1x100 double	0.429717	209	0.626471	2.5948	3.22127	75.06
090120_S032	4296	40x Water 2.78Hz	2307	[158.500000000000,798.500000000000,149.500000000000,29,31,11]	2307x3 double	2307x1 uint16	[173.893999053922,810.202397747465,155.406522905598]	6972.41	38392	371x2 double	371	1x100 double	1x100 double	1953	990.773	[16.8161903014176,735.374019360462,151.671262100289]	44x1 uint16	227	1.06552	2.82678	4.45616	1x100 double	100	TRUE	TRUE	[]	5117.32	1x100 double	0.339421	154	0.763291	4.8326	5.59589	55.26
092220_S004	4335	40x Water 2.78Hz	304	[175.500000000000,449.500000000000,118.500000000000,7,9,8]	304x3 double	304x1 uint16	[178.822871883061,453.914875322442,122.662940670679]	9793.68	25600	54x2 double	54	1x100 double	1x100 double	12715	5716.81	[162.018933304457,208.127364580644,118.096403255229]	42x1 uint16	59	1.07229	7.31295	4.79775	1x100 double	100	TRUE	TRUE	[]	5499.26	1x100 double	0.767241	122	1.18421	2.13273	3.31694	43.74
092220_S004	4335	40x Water 2.78Hz	3546	[241.500000000000,768.500000000000,27.5000000000000,30,43,15]	3546x3 double	3546x1 uint16	[257.423051519155,793.058234258036,34.7408630559225]	6558.1	33280	553x2 double	553	1x100 double	1x100 double	8704	4424.23	[185.193049995990,273.493973795306,30.6439909297052]	31x1 uint16	144	1.17615	4.80716	5.24961	1x100 double	100	TRUE	TRUE	[]	4726.51	1x100 double	0.473066	50	4.98375	5.98109	10.9648	17.82
092220_S004	4335	40x Water 2.78Hz	1089	[14.5000000000000,909.500000000000,242.500000000000,18,20,10]	1089x3 double	1089x1 uint16	[22.9140438463208,921.408508790970,247.312784892555]	10830	38400	192x2 double	192	1x100 double	1x100 double	4176	2266.18	[199.396547696301,481.552991563920,235.335781959766]	17x1 uint16	411	1.09756	2.88842	5.62222	1x100 double	100	TRUE	TRUE	[]	7333.33	1x100 double	0.472727	247	1.1136	4.58182	5.69542	88.74
092220_S004	4335	40x Water 2.78Hz	822	[17.5000000000000,427.500000000000,114.500000000000,13,11,12]	822x3 double	822x1 uint16	[24.5500825536599,433.766097963676,121.026141992295]	11317.6	40960	106x2 double	106	1x100 double	1x100 double	4013	1980.69	[188.435978096237,2.37477183579945,113.145364868539]	13x1 uint16	428	1.12931	3.58228	5.51145	1x100 double	100	TRUE	TRUE	[]	6931.32	1x100 double	0.609756	123	1.76644	2.08714	3.85358	44.1
092220_S004	4335	40x Water 2.78Hz	1762	[57.5000000000000,446.500000000000,42.5000000000000,15,16,17]	1762x3 double	1762x1 uint16	[65.2778378378378,453.654826254826,50.5181467181467]	9407.49	35840	173x2 double	173	1x100 double	1x100 double	3721	2719.93	[139.135612804958,509.481341421781,44.0066966044276]	14x1 uint16	460	1.04831	5.92555	4.78802	1x100 double	100	TRUE	TRUE	[]	5667.51	1x100 double	0.762402	56	3.96	16.8768	20.8368	19.98
092220_S004	4335	40x Water 2.78Hz	566	[240.500000000000,659.500000000000,35.5000000000000,19,12,8]	566x3 double	566x1 uint16	[250.308716707022,664.722154963680,39.3855932203390]	7471.94	28160	122x2 double	122	1x100 double	1x100 double	3337	2169.25	[99.1089086089662,414.324920287350,36.8615496907533]	12x1 uint16	502	1.28249	1.37826	4.11894	1x100 double	100	TRUE	TRUE	[]	4532.46	1x100 double	0.708333	39	0.897097	2.80452	3.70161	13.86
092220_S004	4335	40x Water 2.78Hz	761	[253.500000000000,438.500000000000,29.5000000000000,16,8,12]	761x3 double	761x1 uint16	[261.801127626858,441.959507944644,35.5597129677089]	6563.15	28160	99x2 double	99	1x100 double	1x100 double	2637	1880.25	[193.466427336790,208,30.3531445286531]	[2637;2228;1376;1280]	594	1.0479	6.97383	4.45143	1x100 double	100	TRUE	TRUE	[]	3930.51	1x100 double	0.796053	42	0.595	6.1128	6.7078	14.94
092220_S004	4335	40x Water 2.78Hz	2212	[117.500000000000,761.500000000000,84.5000000000000,19,40,16]	2212x3 double	2212x1 uint16	[125.016024418161,777.281063207427,91.1313747933359]	9100.04	35840	329x2 double	329	1x100 double	1x100 double	2632	2632	[252,302,82]	2632	595	1.63158	11.751	2	1x100 double	100	TRUE	TRUE	[]	5540.18	1x100 double	0.643258	90	0.829895	6.82971	7.65961	32.22
092220_S004	4335	40x Water 2.78Hz	360	[45.5000000000000,384.500000000000,243.500000000000,10,11,10]	360x3 double	360x1 uint16	[51.4212840809147,389.859278803870,247.443271767810]	8085.33	30720	66x2 double	66	1x100 double	1x100 double	1614	1614	[258,590,235]	1614	723	1.11765	5.39099	4.24561	1x100 double	100	TRUE	TRUE	[]	5934.55	1x100 double	0.45098	250	0.927692	0.345	1.27269	89.82
092220_S004	4335	40x Water 2.78Hz	913	[124.500000000000,719.500000000000,87.5000000000000,12,16,14]	913x3 double	913x1 uint16	[130.102838338132,726.679555738379,92.7704648292884]	6816.39	40960	122x2 double	122	1x100 double	1x100 double	1513	1513	[93,648,86]	1513	737	1.287	4.80797	3.77352	1x100 double	100	TRUE	TRUE	[]	4280.66	1x100 double	0.877451	103	5.14862	0.342766	5.49139	36.9
092220_S004	4335	40x Water 2.78Hz	925	[141.500000000000,563.500000000000,229.500000000000,11,22,9]	925x3 double	925x1 uint16	[146.816352201258,575.332389937107,234.001886792453]	8800.86	43520	166x2 double	166	1x100 double	1x100 double	1343	1343	[276,955,223]	1343	760	1.005	1.74229	5.54229	1x100 double	100	TRUE	TRUE	[]	6137.83	1x100 double	0.414573	234	1.24977	2.05347	3.30324	84.06
092220_S009	4335	40x Water 2.78Hz	1196	[68.5000000000000,903.500000000000,306.500000000000,14,23,10]	1196x3 double	1196x1 uint16	[74.0577192490894,916.857943401513,310.942560941440]	7639.33	30720	189x2 double	189	1x38 double	1x38 double	3674	1207.38	[5.12120617691612,118.182408648554,292.124388356709]	76x1 uint16	42	1.14008	8.1597	1.95563	1x38 double	38	TRUE	TRUE	[]	4022.86	1x38 double	0.922559	310	0.827234	2.736	3.56323	111.42
092220_S009	4335	40x Water 2.78Hz	531	[200.500000000000,426.500000000000,62.5000000000000,11,10,11]	531x3 double	531x1 uint16	[206.399196787149,430.319678714859,67.4915662650602]	6002.26	25600	81x2 double	81	1x100 double	1x100 double	1474	591.398	[210.947650844592,364.701278534086,61.6368169504978]	98x1 uint16	108	1.06504	3.91101	4.75573	1x100 double	100	TRUE	TRUE	[]	3128.89	1x100 double	0.878788	69	1.05545	3.87931	4.93476	24.66
092220_S009	4335	40x Water 2.78Hz	1051	[98.5000000000000,909.500000000000,115.500000000000,26,12,8]	1051x3 double	1051x1 uint16	[111.530916844350,915.346268656717,119.420042643923]	5711.89	25600	219x2 double	219	1x100 double	1x100 double	1267	774	[4.96677740863787,140.467515688446,111.096899224806]	[516;593;180;1267;1228;922;712]	133	1.00719	6.15665	4.16429	1x100 double	100	TRUE	TRUE	[]	3705.57	1x100 double	0.533123	118	0.63931	9.86786	10.5072	42.3
092220_S009	4335	40x Water 2.78Hz	664	[254.500000000000,885.500000000000,284.500000000000,17,9,11]	664x3 double	664x1 uint16	[264.340439276486,890.433462532300,290.048449612403]	5968.19	35840	113x2 double	113	1x59 double	1x59 double	1126	556.247	[19.4175983844752,501.631901689406,268.819361670689]	73x1 uint16	154	1.04762	6.19411	2.71212	1x59 double	59	TRUE	TRUE	[]	3670.09	1x59 double	0.604938	294	2.43148	2.11846	4.54994	105.66
092220_S009	4335	40x Water 2.78Hz	772	[173.500000000000,794.500000000000,187.500000000000,24,7,13]	772x3 double	772x1 uint16	[187.405006418485,798.771501925546,193.741335044929]	5166.42	17920	122x2 double	122	1x100 double	1x100 double	597	412	[141.737170596394,986.904299583911,175.221567267684]	[237;591;276;597;307;474;402]	286	1.06944	4.19024	5.11688	1x100 double	100	TRUE	TRUE	[]	2811.8	1x100 double	0.865672	195	1.92	6.975	8.895	70.02
092220_S009	4335	40x Water 2.78Hz	3043	[2.50000000000000,561.500000000000,43.5000000000000,18,30,16]	3043x3 double	3043x1 uint16	[11.8197598961713,579.550129785853,51.4615509409474]	5185.62	40960	329x2 double	329	1x100 double	1x100 double	584	360.857	[98.7082343626287,777.799683293745,43.0225653206651]	[311;272;426;293;584;213;427]	290	1.03608	6.09699	5.10448	1x100 double	100	TRUE	TRUE	[]	2513.31	1x100 double	1.01858	50	1.3641	12.3488	13.7128	17.82
092220_S009	4335	40x Water 2.78Hz	2183	[16.5000000000000,723.500000000000,183.500000000000,40,33,13]	2183x3 double	2183x1 uint16	[41.9564102564103,734.019230769231,191.371611721612]	6402.93	28160	435x2 double	435	1x100 double	1x100 double	483	312.625	[278.483406637345,825.621751299480,170.618952419032]	[186;280;172;315;349;477;239;483]	329	1.0221	3.75969	5.86486	1x100 double	100	TRUE	TRUE	[]	3872.37	1x100 double	0.56383	191	1.12163	7.12165	8.24327	68.58
092220_S009	4335	40x Water 2.78Hz	268	[201.500000000000,925.500000000000,142.500000000000,12,7,7]	268x3 double	268x1 uint16	[208.566037735849,928.370699223086,145.451720310766]	8606.57	28160	59x2 double	59	1x100 double	1x100 double	363	300.429	[196.622919638612,180.600095102235,133.818354731336]	[282;363;249;281;310;355;263]	384	1.03333	8.73745	5.19355	1x100 double	100	TRUE	TRUE	[]	5120	1x100 double	0.661017	153	4.25793	1.224	5.48193	54.9
092220_S009	4335	40x Water 2.78Hz	364	[3.50000000000000,985.500000000000,106.500000000000,12,11,7]	364x3 double	364x1 uint16	[9.52569941444372,990.545217957059,110.747560182173]	10809.7	33280	84x2 double	84	1x100 double	1x100 double	186	183	[122.491803278689,683,99]	[186;180]	491	1.17333	4.66592	4.36364	1x100 double	100	TRUE	TRUE	[]	6857.14	1x100 double	0.626667	113	2.26	2.895	5.155	40.5
092220_S009	4335	40x Water 2.78Hz	1952	[47.5000000000000,424.500000000000,222.500000000000,33,15,10]	1952x3 double	1952x1 uint16	[62.5985358132173,432.898298377523,227.729916897507]	6628.2	28160	343x2 double	343	1x100 double	1x100 double	100	100	[111,285,205]	100	522	1.22515	0.883145	4.04057	1x100 double	100	TRUE	TRUE	[]	4269.15	1x100 double	0.617133	226	0.395397	1.75219	2.14758	81.18
092220_S019	4335	40x Water 2.78Hz	443	[129.500000000000,50.5000000000000,232.500000000000,16,8,9]	443x3 double	443x1 uint16	[135.349884526559,54.1449191685912,237.058891454965]	10008.8	43520	77x2 double	77	1x100 double	1x100 double	11882	4675.26	[48.1736465397047,864.202735835604,224.432784476203]	108x1 uint16	35	1.15686	4.94793	5.87006	1x100 double	100	TRUE	TRUE	[]	5685.19	1x100 double	0.859649	240	2.565	4.43769	7.00269	86.22
092220_S019	4335	40x Water 2.78Hz	472	[2.50000000000000,332.500000000000,101.500000000000,10,10,9]	472x3 double	472x1 uint16	[7.49473684210526,337.543319838057,105.600000000000]	6698.31	28160	73x2 double	73	1x100 double	1x100 double	8782	3894.53	[58.3112653634154,933.602434181246,99.9742630696018]	30x1 uint16	61	1.10227	1.43042	3.92784	1x100 double	100	TRUE	TRUE	[]	4067.95	1x100 double	0.801724	104	0.570937	1.76063	2.33156	37.26
092220_S019	4335	40x Water 2.78Hz	1790	[78.5000000000000,361.500000000000,38.5000000000000,19,22,12]	1790x3 double	1790x1 uint16	[88.1985045827303,375.263386396527,45.1796912686927]	5929.47	28160	244x2 double	244	1x100 double	1x100 double	6855	3257.31	[35.6351989609163,965.223013342780,37.9575628763727]	26x1 uint16	119	1.048	6.63963	6.05344	1x100 double	100	TRUE	TRUE	[]	3430.82	1x100 double	0.840979	67	8.93478	5.00143	13.9362	23.94
092220_S019	4335	40x Water 2.78Hz	1005	[91.5000000000000,760.500000000000,280.500000000000,31,16,10]	1005x3 double	1005x1 uint16	[108.669144981413,767.217678645188,285.699297810822]	6166.93	28160	221x2 double	221	1x63 double	1x63 double	6639	3458.16	[97.4802046048954,390.066046768669,268.034874081881]	45x1 uint16	132	1.0625	9.25075	3.62353	1x63 double	63	TRUE	TRUE	[]	3683.62	1x63 double	0.597484	285	0.933488	10.3903	11.3238	102.42
092220_S019	4335	40x Water 2.78Hz	1043	[125.500000000000,3.50000000000000,266.500000000000,11,11,17]	1043x3 double	1043x1 uint16	[129.876683937824,8.51606217616580,275.575647668394]	4737.1	30720	87x2 double	87	1x73 double	1x73 double	6410	4174.73	[16.5872348765298,682.553373110927,254.710204259396]	11x1 uint16	147	1.44	2.3476	3.38889	1x73 double	73	TRUE	TRUE	[]	2412.87	1x73 double	1.42683	278	0.846818	5.013	5.85982	99.9
092220_S019	4335	40x Water 2.78Hz	1249	[162.500000000000,361.500000000000,110.500000000000,16,18,12]	1249x3 double	1249x1 uint16	[170.037270087125,371.796708615682,115.821878025169]	4234.56	20480	180x2 double	180	1x100 double	1x100 double	4365	2479.28	[10.7182399132813,515.247173449967,110.119439857822]	32x1 uint16	259	1.06699	2.88222	4.48879	1x100 double	100	TRUE	TRUE	[]	2275.56	1x100 double	0.94375	115	0.976854	1.38649	2.36334	41.22
092220_S019	4335	40x Water 2.78Hz	520	[261.500000000000,597.500000000000,223.500000000000,19,7,12]	520x3 double	520x1 uint16	[270.417391304348,600.686956521739,229.070434782609]	5661.54	23040	90x2 double	90	1x100 double	1x100 double	4255	2266.08	[198.866215570184,731.072334792042,214.758320155923]	12x1 uint16	263	1.06015	2.83876	4.77305	1x100 double	100	TRUE	TRUE	[]	2872.89	1x100 double	1.06931	229	1.46118	7.665	9.12618	82.26
092220_S019	4335	40x Water 2.78Hz	72	[227.500000000000,880.500000000000,284.500000000000,5,5,5]	72x3 double	72x1 uint16	[229.548494983278,882.722408026756,286.816053511706]	10631.1	28160	20x2 double	20	1x62 double	1x62 double	4170	2778.5	[49.3055005698518,830.878591566193,273.182412572731]	[2166;2024;4170;3104;3218;1989]	271	1.28099	7.30109	0.432258	1x62 double	62	TRUE	TRUE	[]	4864	1x62 double	2.73684	296	0.912	3.08348	3.99548	106.38
092220_S019	4335	40x Water 2.78Hz	435	[288.500000000000,260.500000000000,242.500000000000,9,8,16]	435x3 double	435x1 uint16	[293.186953597848,264.112306657700,249.428379287155]	8751.08	30720	51x2 double	51	1x100 double	1x100 double	3771	2461.46	[182.484265133285,677.532235382356,232.527891496609]	13x1 uint16	310	1.32203	5.20666	4.58974	1x100 double	100	TRUE	TRUE	[]	5019.61	1x100 double	1.01	259	0.349615	2.83	3.17962	93.06
092220_S019	4335	40x Water 2.78Hz	2438	[222.500000000000,876.500000000000,291.500000000000,15,42,10]	2438x3 double	2438x1 uint16	[230.368671828469,893.837849910661,296.316110780226]	7052.08	46080	411x2 double	411	1x53 double	1x53 double	3451	1995.17	[120.138000167070,686.206749644975,278.407484754824]	[702;3451;1288;1652;2989;1889]	341	1.10152	2.11584	3.34332	1x53 double	53	TRUE	TRUE	[]	3656.25	1x53 double	0.90971	295	0.435789	2.37873	2.81452	106.02
092220_S019	4335	40x Water 2.78Hz	472	[156.500000000000,764.500000000000,24.5000000000000,11,9,10]	472x3 double	472x1 uint16	[161.349633251834,768.859413202934,29.2212713936430]	4436.61	17920	73x2 double	73	1x100 double	1x100 double	3015	2576.5	[79.4149039394527,710,25]	[3015;2138]	375	1.35714	3.07969	2.91228	1x100 double	100	TRUE	TRUE	[]	2244.38	1x100 double	1.25	28	0.58	0.977143	1.55714	9.9
092220_S019	4335	40x Water 2.78Hz	935	[225.500000000000,32.5000000000000,181.500000000000,15,11,12]	935x3 double	935x1 uint16	[232.292234332425,38.6607629427793,186.910762942779]	8038.67	33280	127x2 double	127	1x100 double	1x100 double	2900	2392.75	[295.441542158604,945.483335074705,172]	[2900;2445;2045;2181]	384	1.1164	6.82064	4.95261	1x100 double	100	TRUE	TRUE	[]	4595.91	1x100 double	0.780702	187	1.63102	10.3819	12.013	67.14
092220_S019	4335	40x Water 2.78Hz	992	[14.5000000000000,85.5000000000000,120.500000000000,12,20,10]	992x3 double	992x1 uint16	[21.2772988505747,97.3606321839081,125.040229885057]	5388.39	25600	157x2 double	157	1x100 double	1x100 double	1471	1471	[255,423,114]	1471	499	1.13725	1.21072	4.84483	1x100 double	100	TRUE	TRUE	[]	2788.28	1x100 double	0.94152	124	0.925116	5.796	6.72112	44.46
092220_S019	4335	40x Water 2.78Hz	1012	[280.500000000000,540.500000000000,73.5000000000000,19,12,13]	1012x3 double	1012x1 uint16	[287.553314121038,547.341786743516,79.6795389048991]	4388.93	25600	149x2 double	149	1x100 double	1x100 double	1210	1210	[14,548,72]	1210	527	1.01156	4.3776	5.64	1x100 double	100	TRUE	TRUE	[]	2371.01	1x100 double	0.724638	81	2.07	4.99886	7.06886	28.98
092220_S019	4335	40x Water 2.78Hz	2161	[253.500000000000,682.500000000000,259.500000000000,21,35,11]	2161x3 double	2161x1 uint16	[264.218725868726,701.349227799228,265.296332046332]	6136.42	30720	369x2 double	369	1x84 double	1x84 double	956	944.5	[174,430.493912122816,249]	[956;933]	544	1.07304	0.809377	4.04052	1x84 double	84	TRUE	TRUE	[]	3545.15	1x84 double	0.671233	263	0.407755	3.18436	3.59212	94.5
092220_S021	4335	40x Water 2.78Hz	4670	[218.500000000000,389.500000000000,216.500000000000,30,31,19]	4670x3 double	4670x1 uint16	[234.864682654339,403.861215448329,226.020417990947]	5691.75	33280	572x2 double	572	1x85 double	1x85 double	7597	3341.43	[146.268441931396,170.071392640420,204.064891401937]	47x1 uint16	76	1.01896	7.79466	5.0186	1x85 double	85	TRUE	TRUE	[]	2747.97	1x85 double	1.02932	240	6.01692	10.7475	16.7644	86.22
092220_S021	4335	40x Water 2.78Hz	494	[240.500000000000,437.500000000000,163.500000000000,10,15,8]	494x3 double	494x1 uint16	[245.358933333333,444.520000000000,167.540266666667]	9716.6	51200	93x2 double	93	1x85 double	1x85 double	7575	3997.17	[71.2432278419436,35.4084420909255,156.161267008576]	18x1 uint16	79	1.00769	3.00164	5.8626	1x85 double	85	TRUE	TRUE	[]	5367.74	1x85 double	0.748718	168	1.32	1.71	3.03	60.3
092220_S021	4335	40x Water 2.78Hz	554	[241.500000000000,948.500000000000,58.5000000000000,11,11,9]	554x3 double	554x1 uint16	[246.825340014316,954.040801717967,62.8883321403007]	6455.45	28160	86x2 double	86	1x85 double	1x85 double	6501	2999.18	[24.4226132328769,129.937795768428,62.8162184928021]	57x1 uint16	106	1.01031	1.47097	4.07143	1x85 double	85	TRUE	TRUE	[]	3780.47	1x85 double	0.834646	61	0.307742	3.20604	3.51378	21.78
092220_S021	4335	40x Water 2.78Hz	1602	[72.5000000000000,372.500000000000,232.500000000000,22,10,14]	1602x3 double	1602x1 uint16	[83.7517842981761,377.160454665609,239.819984139572]	6045.24	35840	175x2 double	175	1x85 double	1x85 double	6443	3491.05	[87.0225840494497,1012.73692145334,219.202140811096]	19x1 uint16	109	1.00535	7.19709	5.81915	1x85 double	85	TRUE	FALSE	[]	2545.37	1x85 double	1.31609	244	3.16232	6.66	9.82232	87.66
092220_S021	4335	40x Water 2.78Hz	495	[241.500000000000,437.500000000000,145.500000000000,9,12,9]	495x3 double	495x1 uint16	[246.433512682552,444,149.777094542659]	6728.4	28160	85x2 double	85	1x85 double	1x85 double	4823	2477.91	[16.3192026951151,26.0643950028074,139.873964766985]	23x1 uint16	156	1.11966	2.45094	5.48855	1x85 double	85	TRUE	TRUE	[]	3343.06	1x85 double	1.92793	168	1.63565	5.598	7.23365	60.3
092220_S021	4335	40x Water 2.78Hz	604	[77.5000000000000,254.500000000000,193.500000000000,16,11,9]	604x3 double	604x1 uint16	[85.8799403430276,259.802386278896,197.547352721849]	5683.71	20480	116x2 double	116	1x85 double	1x85 double	4497	2042.14	[293.616299405387,701.750868602075,182.691337297423]	21x1 uint16	170	1.20635	3.89924	4.59211	1x85 double	85	TRUE	TRUE	[]	3354.48	1x85 double	0.730263	198	1.24463	0.665	1.90963	71.1
092220_S021	4335	40x Water 2.78Hz	18104	[188.500000000000,572.500000000000,252.500000000000,60,64,15]	18104x3 double	18104x1 uint16	[215.442210929482,608.967732245225,259.737477157233]	5648.71	43520	2038x2 double	2038	1x85 double	1x85 double	3812	2682.25	[132.241588218846,917.307670798770,236.481358933731]	[1844;3812;2985;2864;3640;1773;2320;2220]	199	1.0778	6.55392	5.80565	1x85 double	85	TRUE	TRUE	[]	2730.83	1x85 double	1.03358	265	3.54446	2.33721	5.88166	95.22
092220_S021	4335	40x Water 2.78Hz	3155	[218.500000000000,388.500000000000,140.500000000000,36,31,12]	3155x3 double	3155x1 uint16	[236.540741995595,402.479247840081,146.116889717093]	4789.76	25600	515x2 double	515	1x85 double	1x85 double	3396	1835.93	[189.597479937543,429.590834816079,133.088129561713]	15x1 uint16	232	1.02023	3.73752	2.22096	1x85 double	85	TRUE	TRUE	[]	2564.97	1x85 double	0.922481	143	0.177391	7.56643	7.74382	51.3
092220_S021	4335	40x Water 2.78Hz	1438	[100.500000000000,597.500000000000,58.5000000000000,25,29,9]	1438x3 double	1438x1 uint16	[110.101908396947,611.676335877863,62.4675572519084]	4664.26	23040	372x2 double	372	1x85 double	1x85 double	2912	1973.44	[284.887900456055,789.937390912674,55.6734418107089]	[2055;2364;1381;1601;1692;2641;2912;1813;1302]	263	1.08824	4.21749	4.58784	1x85 double	85	TRUE	TRUE	[]	2738.92	1x85 double	0.703518	63	1.2219	3.83094	5.05284	22.5
092220_S021	4335	40x Water 2.78Hz	739	[72.5000000000000,356.500000000000,240.500000000000,12,9,16]	739x3 double	739x1 uint16	[79.2891682785300,360.791102514507,248.503868471954]	3581.92	25600	86x2 double	86	1x85 double	1x85 double	2561	2201	[133.476601544752,157.018400726942,224]	[2561;2047;1885;2311]	293	1.07018	3.69442	5.86885	1x85 double	85	TRUE	TRUE	[]	1905.12	1x85 double	0.984375	251	1.27333	1.82571	3.09905	90.18
092220_S021	4335	40x Water 2.78Hz	566	[36.5000000000000,744.500000000000,200.500000000000,15,15,10]	566x3 double	566x1 uint16	[44.0974025974026,752.086850649351,205.609577922078]	5572.3	23040	124x2 double	124	1x85 double	1x85 double	1955	1636	[82.4656173594132,53,189.935819070905]	[1542;1955;1925;1122]	355	1.27397	3.25517	4.82796	1x85 double	85	TRUE	TRUE	[]	3716.13	1x85 double	0.55	208	1.95171	0.675	2.62671	74.7
092220_S021	4335	40x Water 2.78Hz	1451	[0.500000000000000,741.500000000000,199.500000000000,27,16,10]	1451x3 double	1451x1 uint16	[12.7604516325908,748.928288068355,204.940189197437]	5781.61	23040	281x2 double	281	1x85 double	1x85 double	1650	1336.5	[13,497,188.382716049383]	[1650;1023]	383	1.2093	1.81976	3.02404	1x85 double	85	TRUE	TRUE	[]	4081.42	1x85 double	0.457589	203	0.259859	1.0525	1.31236	72.9
092220_S021	4335	40x Water 2.78Hz	6877	[15.5000000000000,447.500000000000,148.500000000000,52,33,12]	6877x3 double	6877x1 uint16	[47.5495458858615,462.250982784330,155.069472685373]	5492.26	43520	1051x2 double	1051	1x85 double	1x85 double	1505	1505	[249,354,141]	1505	407	1.06343	0.449146	5.02889	1x85 double	85	TRUE	TRUE	[]	2662.3	1x85 double	1.08783	154	0.733538	3.19446	3.928	55.26
092220_S021	4335	40x Water 2.78Hz	40748	[54.5000000000000,458.500000000000,260.500000000000,128,65,17]	40748x3 double	40748x1 uint16	[115.828130488844,490.087384550481,268.041815104940]	11129.9	65535	4676x2 double	4676	1x81 double	1x81 double	23586	6912.24	[110.132947309674,491.935237048160,268.067424274587]	40748x1 uint16	1	1.01484	3.39078	6.47714	1x81 double	81	TRUE	TRUE	[]	7312.78	1x81 double	0.518909	269	1.72885	4.87233	6.60118	96.66
110520_S011	4392	40x Water 2.78Hz	2373	[60.5000000000000,736.500000000000,223.500000000000,24,24,12]	2373x3 double	2373x1 uint16	[70.4214060912199,748.491133531685,229.419897751226]	7979.51	48632	349x2 double	349	1x100 double	1x100 double	15948	5099.21	[70.1984622513423,748.771260858200,229.430317732025]	2373x1 uint16	5	1.03621	4.2417	5.87545	1x100 double	100	TRUE	TRUE	[]	5647.03	1x100 double	0.44268	231	1.69146	3.49776	5.18922	82.98
110520_S011	4392	40x Water 2.78Hz	2008	[187.500000000000,475.500000000000,261.500000000000,17,29,12]	2008x3 double	2008x1 uint16	[195.891892487778,487.505025388647,267.302820493057]	10932.4	65529	322x2 double	322	1x82 double	1x82 double	13154	4959.39	[195.742008500113,485.923898443695,267.290007808439]	2008x1 uint16	8	1.12084	3.06215	5.55838	1x82 double	82	TRUE	TRUE	[]	7658.13	1x82 double	0.402432	269	1.60024	1.57147	3.17171	96.66
110520_S011	4392	40x Water 2.78Hz	4484	[27.5000000000000,0.500000000000000,85.5000000000000,40,20,20]	4484x3 double	4484x1 uint16	[47.6879506114997,10.3401920216623,96.3804550286381]	5462.49	40933	506x2 double	506	1x100 double	1x100 double	11911	3767.29	[45.9855402306961,10.5020884978467,96.5185078914199]	4484x1 uint16	9	1.06412	3.32651	5.96834	1x100 double	100	TRUE	TRUE	[]	3533.32	1x100 double	0.554656	99	2.06285	4.31277	6.37562	35.46
110520_S011	4392	40x Water 2.78Hz	10628	[85.5000000000000,458.500000000000,230.500000000000,79,55,11]	10628x3 double	10628x1 uint16	[122.198393733815,479.180049067570,235.338785175144]	10323	56279	2148x2 double	2148	1x100 double	1x100 double	11903	3645.71	[121.372482273223,476.494114336560,235.221731790774]	10628x1 uint16	10	1.01837	1.59646	6.01637	1x100 double	100	TRUE	TRUE	[]	6574.37	1x100 double	1.1249	267	1.37677	7.15578	8.53255	95.94
110520_S011	4392	40x Water 2.78Hz	775	[26.5000000000000,155.500000000000,76.5000000000000,14,12,10]	775x3 double	775x1 uint16	[32.7167179155474,161.231135206464,81.3790742232599]	6168.09	46091	113x2 double	113	1x100 double	1x100 double	7855	3118.13	[33.0256394234430,160.600653741364,81.2658370273017]	775x1 uint16	16	1.01374	7.13196	5.40074	1x100 double	100	TRUE	TRUE	[]	4534.79	1x100 double	0.270909	86	1.28473	0.344438	1.62917	30.78
110520_S011	4392	40x Water 2.78Hz	664	[57.5000000000000,503.500000000000,232.500000000000,12,17,8]	664x3 double	664x1 uint16	[63.1577748707117,512.611779718682,236.666155490890]	8541.02	30776	138x2 double	138	1x100 double	1x100 double	4190	2310.61	[63.1541817229027,512.850228255145,236.521916274292]	664x1 uint16	46	1.04291	8.51996	5.4708	1x100 double	100	TRUE	TRUE	[]	5516.3	1x100 double	1.28398	271	2.78145	2.48845	5.2699	97.38
110520_S011	4392	40x Water 2.78Hz	51	[194.500000000000,480.500000000000,232.500000000000,5,7,4]	51x3 double	51x1 uint16	[196.573716379400,483.866136512425,234.313552491872]	14256.5	35877	25x2 double	25	1x100 double	1x100 double	2377	1741.22	[196.717055922164,483.981250422288,234.282549942569]	51x1 uint16	86	1.01232	2.20262	5.73719	1x100 double	100	TRUE	TRUE	[]	9014.64	1x100 double	1.53273	266	1.05184	2.68938	3.74122	95.58
110520_S011	4392	40x Water 2.78Hz	74	[98.5000000000000,507.500000000000,255.500000000000,6,7,3]	74x3 double	74x1 uint16	[101.596603624454,511.777658278680,257.080370998342]	11660.3	30745	33x2 double	33	1x92 double	1x92 double	1319	756.243	[101.713966620207,511.095957971481,257.059361709732]	74x1 uint16	167	1.07233	3.47547	5.34548	1x92 double	92	TRUE	TRUE	[]	8927.45	1x92 double	1.32882	269	1.74056	1.1943	2.93486	96.66
110520_S014	4392	40x Water 2.78Hz	690	[2.50000000000000,464.500000000000,190.500000000000,16,9,10]	690x3 double	690x1 uint16	[10.9628876461617,467.827656329436,195.141331977631]	7297.86	30720	117x2 double	117	1x100 double	1x100 double	5545	2510.43	[18.9607494451716,877.295510157628,179.641338985944]	28x1 uint16	83	1.36111	4.46723	2.41837	1x100 double	100	0	TRUE	TRUE	[]	4310.43	1x100 double	0.720812	193	0.502418	1.01739	1.51981	69.3
110520_S014	4392	40x Water 2.78Hz	7930	[168.500000000000,340.500000000000,56.5000000000000,57,50,15]	7930x3 double	7930x1 uint16	[193.388046342797,366.828949331212,64.2632390234200]	6492.33	51200	1186x2 double	1186	1x100 double	1x100 double	5139	3077.64	[114.841662529898,254.927388420055,56.6638747235886]	36x1 uint16	95	1.01574	6.02862	2.67042	1x100 double	100	0	TRUE	TRUE	[]	3634.94	1x100 double	0.67696	61	0.238605	9.69722	9.93582	21.78
110520_S014	4392	40x Water 2.78Hz	4739	[20.5000000000000,908.500000000000,189.500000000000,50,20,23]	4739x3 double	4739x1 uint16	[43.0228497521018,917.864194869584,203.302938851764]	7517.94	35840	457x2 double	457	1x100 double	1x100 double	5020	2276.91	[28.8470737338754,893.058763740401,178.420644481253]	35x1 uint16	98	1.10833	3.83838	6.03308	1x100 double	100	0	TRUE	TRUE	[]	4503.81	1x100 double	0.782338	207	2.03684	5.87647	7.91331	74.34
110520_S014	4392	40x Water 2.78Hz	839	[230.500000000000,759.500000000000,137.500000000000,16,12,11]	839x3 double	839x1 uint16	[237.561243144424,764.538848263254,143.102376599634]	6676.14	30720	128x2 double	128	1x100 double	1x100 double	4563	2292.27	[51.8500174499767,634.415134946487,130.905450209400]	15x1 uint16	120	1.06993	9.35128	5.01307	1x100 double	100	0	TRUE	TRUE	[]	3680	1x100 double	0.744565	152	1.40087	8.58	9.98087	54.54
110520_S014	4392	40x Water 2.78Hz	3469	[95.5000000000000,999.500000000000,64.5000000000000,63,25,13]	3469x3 double	3469x1 uint16	[123.025090030872,1016.12695421142,69.5067376733768]	5268.92	23040	600x2 double	600	1x100 double	1x100 double	3479	2715.5	[260.060504511140,772.697403793040,61.6761185785307]	[2785;2436;3479;2053;2793;3040;3443;2741;2427;1958]	177	1.03515	5.41379	3.27434	1x100 double	100	0	TRUE	TRUE	[]	3120.48	1x100 double	0.616531	67	0.569245	9.35672	9.92597	23.94
110520_S014	4392	40x Water 2.78Hz	8581	[134.500000000000,735.500000000000,46.5000000000000,127,25,18]	8581x3 double	8581x1 uint16	[196.342511717086,743.562846186621,56.2633681295271]	5601.51	40960	970x2 double	970	1x100 double	1x100 double	3085	2298.27	[83.2282299704125,114.267592968614,45.4859894413181]	15x1 uint16	213	1.05882	6.66577	5.57407	1x100 double	100	0	TRUE	TRUE	[]	2945.32	1x100 double	0.875448	62	3.42863	14.3318	17.7605	22.14
110520_S014	4392	40x Water 2.78Hz	2215	[162.500000000000,110.500000000000,19.5000000000000,40,19,8]	2215x3 double	2215x1 uint16	[184.442421763142,120.667825731233,22.2521988136633]	5650.49	25600	462x2 double	462	1x100 double	1x100 double	2548	2040.83	[137.277909350755,639.363005308289,20.5156390363414]	[2195;1897;1839;2202;2548;1564]	270	1.1245	2.22545	4.46071	1x100 double	100	0	TRUE	TRUE	[]	3623.9	1x100 double	0.545872	20	0.848754	2.43517	3.28393	7.02
110520_S014	4392	40x Water 2.78Hz	2846	[88.5000000000000,49.5000000000000,119.500000000000,35,22,12]	2846x3 double	2846x1 uint16	[106.750989881214,57.5805103387593,125.165420149582]	4089.16	28160	363x2 double	363	1x100 double	1x100 double	2079	1796.17	[199.181126473044,419.354365778974,112.715783613250]	[1325;1738;1740;1941;2079;1954]	313	1.03719	3.42825	6.11554	1x100 double	100	0	TRUE	TRUE	[]	2143.91	1x100 double	0.881579	126	1.93571	3.87692	5.81263	45.18
110520_S014	4392	40x Water 2.78Hz	26605	[232.500000000000,678.500000000000,45.5000000000000,68,54,29]	26605x3 double	26605x1 uint16	[275.536780409474,711.075343235648,60.0020232838218]	5992.26	46080	2200x2 double	2200	1x100 double	1x100 double	2012	1726.33	[210.641243483298,659,44.7472485035721]	[1309;1858;2012]	322	1.004	7.02536	5.97966	1x100 double	100	0	TRUE	TRUE	[]	2960.29	1x100 double	1.13561	69	4.85423	15.3762	20.2304	24.66
110520_S014	4392	40x Water 2.78Hz	21083	[71.5000000000000,869.500000000000,183.500000000000,62,66,26]	21083x3 double	21083x1 uint16	[94.5179991403396,907.932659932660,198.806057024142]	6779.88	46080	1862x2 double	1862	1x100 double	1x100 double	1752	1752	[6,5,173]	1752	351	1.11264	4.83012	5.91174	1x100 double	100	0	TRUE	TRUE	[]	3603.52	1x100 double	0.931705	204	2.72727	8.06336	10.7906	73.26
110520_S014	4392	40x Water 2.78Hz	20316	[191.500000000000,956.500000000000,26.5000000000000,104,47,23]	20316x3 double	20316x1 uint16	[245.956769111068,983.366976269208,38.2692326395643]	5182.5	46080	1908x2 double	1908	1x100 double	1x100 double	1741	1520	[70,216,27.5726973684211]	[1299;1741]	353	1.06809	2.39341	5.14625	1x100 double	100	0	TRUE	TRUE	[]	2574.76	1x100 double	1.08546	42	2.56737	24.6517	27.2191	14.94
110520_S014	4392	40x Water 2.78Hz	1684	[49.5000000000000,875.500000000000,188.500000000000,18,12,20]	1684x3 double	1684x1 uint16	[58.2823980990678,882.121184426979,199.628404313654]	8316.96	43520	150x2 double	150	1x100 double	1x100 double	1719	1105	[226.501357466063,610.004977375566,176]	[1685;519;497;1719]	355	1.08864	3.20532	5.15267	1x100 double	100	0	TRUE	TRUE	[]	4266.67	1x100 double	1.148	205	3.00273	6.76317	9.7659	73.62
110520_S014	4392	40x Water 2.78Hz	3296	[255.500000000000,901.500000000000,240.500000000000,45,19,14]	3296x3 double	3296x1 uint16	[278.024550167734,912.503964623361,246.764409881061]	5093.59	30720	527x2 double	527	1x100 double	1x100 double	1363	792.75	[162.864711447493,604.885209713024,228.320088300221]	[429;364;1363;1015]	394	1.08756	2.62471	3.52542	1x100 double	100	0	TRUE	TRUE	[]	3074.91	1x100 double	0.603476	245	0.571404	3.5472	4.1186	88.02
110520_S014	4392	40x Water 2.78Hz	15151	[177.500000000000,852.500000000000,109.500000000000,111,45,22]	15151x3 double	15151x1 uint16	[231.347353891976,877.043441938179,120.230685409175]	4651.8	43520	2401x2 double	2401	1x100 double	1x100 double	1233	816.333	[28.2221314822376,1020.27439771335,104]	[1233;672;544]	417	1.03755	3.84941	5.92939	1x100 double	100	0	TRUE	TRUE	[]	2986.49	1x100 double	0.499821	120	1.36364	9.15304	10.5167	43.02
110520_S014	4392	40x Water 2.78Hz	8443	[14.5000000000000,207.500000000000,151.500000000000,53,45,14]	8443x3 double	8443x1 uint16	[41.3401731012350,232.930791921942,159.120814288956]	9353.72	56320	1116x2 double	1116	1x100 double	1x100 double	734	734	[6,152,143]	734	471	1.03299	2.18364	5.48004	1x100 double	100	1	TRUE	TRUE	[]	5136.06	1x100 double	0.76418	160	1.59718	7.852	9.44918	57.42
110520_S014	4392	40x Water 2.78Hz	1598	[204.500000000000,368.500000000000,144.500000000000,28,12,18]	1598x3 double	1598x1 uint16	[216.884097035040,376.126477296289,153.769438109061]	7726.46	30720	193x2 double	193	1x100 double	1x100 double	722	722	[116,878,137]	722	475	1.01415	6.43242	5.82326	1x100 double	100	0	TRUE	TRUE	[]	4854.72	1x100 double	0.743169	163	3.144	7.10182	10.2458	58.5
110520_S029	4392	40x Water 2.78Hz	3068	[177.500000000000,219.500000000000,21.5000000000000,14,38,13]	3068x3 double	3068x1 uint16	[185.178374558304,238.363816254417,27.4866431095406]	5903.52	30720	381x2 double	381	1x100 double	1x100 double	33738	12353.1	[184.972073081432,237.870616806975,27.0235048066308]	3068x1 uint16	7	1.21186	3.78578	5.17483	1x100 double	100	0	TRUE	TRUE	[]	3688.82	1x100 double	0.54827	26	0.958	6.94	7.898	9.18
110520_S029	4392	40x Water 2.78Hz	2109	[227.500000000000,435.500000000000,22.5000000000000,21,21,10]	2109x3 double	2109x1 uint16	[238.906582077716,446.002537668517,26.7108643933386]	7653.3	43520	358x2 double	358	1x100 double	1x100 double	23757	9204.73	[238.381610548226,445.672393718345,26.7784927878185]	2109x1 uint16	19	1.08113	1.77151	3.55791	1x100 double	100	0	TRUE	TRUE	[]	5577.65	1x100 double	0.434615	24	0.360706	4.69687	5.05758	8.46
110520_S029	4392	40x Water 2.78Hz	4192	[6.50000000000000,105.500000000000,98.5000000000000,24,39,12]	4192x3 double	4192x1 uint16	[19.5143162013160,127.622532455984,104.331762404410]	6867.79	40960	543x2 double	543	1x100 double	1x100 double	16314	3665.85	[292.286378953320,137.649712312124,101.319828686264]	357x1 uint16	41	1.20031	3.71749	5.45372	1x100 double	100	0	TRUE	TRUE	[]	4676.83	1x100 double	0.503024	107	2.28514	4.29	6.57514	38.34
110520_S029	4392	40x Water 2.78Hz	2120	[166.500000000000,564.500000000000,168.500000000000,16,27,11]	2120x3 double	2120x1 uint16	[173.436570282467,580.181347150259,174.749623934481]	7224.75	35840	285x2 double	285	1x100 double	1x100 double	15968	6396.6	[261.208221317157,37.8339561056234,163.747830086634]	173x1 uint16	44	1.23888	2.60012	4.81474	1x100 double	100	0	TRUE	TRUE	[]	4940.35	1x100 double	0.549091	174	0.738	4.55797	5.29597	62.46
110520_S029	4392	40x Water 2.78Hz	4555	[199.500000000000,170.500000000000,137.500000000000,36,33,12]	4555x3 double	4555x1 uint16	[218.217219095268,184.122368146758,143.513133208255]	5392.02	30720	732x2 double	732	1x100 double	1x100 double	9089	6198.7	[294.337517462475,261.788754680973,134.599435708916]	47x1 uint16	129	1.04219	1.24539	4.87314	1x100 double	100	0	TRUE	TRUE	[]	3493.77	1x100 double	0.522523	142	0.800471	4.67333	5.4738	50.94
110520_S029	4392	40x Water 2.78Hz	2066	[177.500000000000,90.5000000000000,268.500000000000,28,13,14]	2066x3 double	2066x1 uint16	[189.896262740657,97.3329558323896,274.121177802945]	5470.67	25600	278x2 double	278	1x75 double	1x75 double	8361	6211.29	[242.319372570666,821.771184556529,257.376055107063]	42x1 uint16	144	1.08654	7.25644	4.92035	1x75 double	75	[]	TRUE	TRUE	[]	4429.35	1x75 double	0.239085	277	2.61593	3.105	5.72093	99.54
110520_S029	4392	40x Water 2.78Hz	2126	[222.500000000000,466.500000000000,297.500000000000,20,21,11]	2126x3 double	2126x1 uint16	[232.534812807047,476.819583262748,302.798238183974]	7108.03	43520	312x2 double	312	1x46 double	1x46 double	7255	4959.55	[128.209202291480,887.117677524443,285.797716427411]	51x1 uint16	182	1.04952	1.26679	4.45191	1x46 double	46	[]	TRUE	TRUE	[]	4676.92	1x46 double	0.624561	304	1.78265	2.27912	4.06177	109.26
110520_S029	4392	40x Water 2.78Hz	1063	[209.500000000000,589.500000000000,187.500000000000,13,12,12]	1063x3 double	1063x1 uint16	[215.992256637168,596.073838495575,193.485342920354]	8708.33	51200	131x2 double	131	1x100 double	1x100 double	5745	2895.77	[192.235155514659,595.162000138975,182.948846826852]	164x1 uint16	238	1.42105	1.30573	4.21693	1x100 double	100	0	TRUE	TRUE	[]	4924.58	1x100 double	0.936508	192	0.893333	5.256	6.14933	68.94
110520_S029	4392	40x Water 2.78Hz	3526	[209.500000000000,454.500000000000,152.500000000000,20,41,11]	3526x3 double	3526x1 uint16	[220.896163728183,479.958713564278,157.737662797909]	8194.76	46080	481x2 double	481	1x100 double	1x100 double	5738	3549.63	[135.840139816361,742.194151711185,148.147448873122]	54x1 uint16	240	1.04868	1.5262	3.63443	1x100 double	100	0	TRUE	TRUE	[]	4981.62	1x100 double	0.633547	155	0.276528	6.60273	6.87926	55.62
110520_S029	4392	40x Water 2.78Hz	1106	[99.5000000000000,498.500000000000,33.5000000000000,14,21,12]	1106x3 double	1106x1 uint16	[105.550505050505,507.220057720058,38.6980519480520]	6416.2	28160	185x2 double	185	1x100 double	1x100 double	3726	1989.85	[281.783660665797,45.4796832318778,36.1928573165493]	62x1 uint16	396	1.22321	1.63353	3.66423	1x100 double	100	0	TRUE	TRUE	[]	4345.08	1x100 double	0.487261	36	0.262286	3.91091	4.17319	12.78
110520_S029	4392	40x Water 2.78Hz	6540	[131.500000000000,209.500000000000,285.500000000000,31,34,16]	6540x3 double	6540x1 uint16	[144.011633290890,224.201180692210,293.070610024308]	6763.25	53760	753x2 double	753	1x56 double	1x56 double	3346	2798	[249.894531808435,263.174195854182,275.736954967834]	[2509;2508;2343;2960;3040;2929;3346;2787;2876;2682]	424	1.03735	1.87254	5.54501	1x56 double	56	[]	TRUE	TRUE	[]	4181.67	1x56 double	0.687805	293	1.08581	3.95089	5.03669	105.3
110520_S029	4392	40x Water 2.78Hz	9080	[55.5000000000000,902.500000000000,168.500000000000,51,50,12]	9080x3 double	9080x1 uint16	[80.2488504791978,923.593762118442,174.017228962384]	5089.27	30720	1285x2 double	1285	1x100 double	1x100 double	3259	2038.21	[257.719251201191,216.779894430534,162.335589091155]	58x1 uint16	433	1.07504	1.86857	5.17852	1x100 double	100	0	TRUE	TRUE	[]	3396.73	1x100 double	0.502053	173	0.941243	5.0341	5.97534	62.1
110520_S029	4392	40x Water 2.78Hz	835	[131.500000000000,864.500000000000,53.5000000000000,31,10,7]	835x3 double	835x1 uint16	[149.235404016815,869.511910322279,57.1331153666511]	6564.02	28160	180x2 double	180	1x100 double	1x100 double	1439	1439	[206,702,53]	1439	626	1.25316	2.34325	5.37037	1x100 double	100	0	TRUE	TRUE	[]	4394.67	1x100 double	0.543689	57	1.18832	4.752	5.94032	20.34
110520_S029	4392	40x Water 2.78Hz	5302	[75.5000000000000,804.500000000000,106.500000000000,61,18,16]	5302x3 double	5302x1 uint16	[103.593973872735,814.399283607248,115.690370838601]	4583.09	30720	648x2 double	648	1x100 double	1x100 double	556	367	[239.237057220708,763.504995458674,102]	[284;556;261]	683	1.00522	5.14343	5.34286	1x100 double	100	0	TRUE	TRUE	[]	2907.65	1x100 double	0.600543	120	3.01161	2.42143	5.43304	43.02
110520_S015	4392	40x Water 2.78Hz	1228	[51.5000000000000,883.500000000000,113.500000000000,16,17,14]	1228x3 double	1228x1 uint16	[59.8223244147157,891.461956521739,119.235785953177]	4986.58	25600	180x2 double	180	1x100 double	1x100 double	13199	4343.97	[83.9225987050674,310.094982333457,111.401087090927]	175x1 uint16	9	1.0117	7.29103	3.91329	1x100 double	100	0	TRUE	TRUE	[]	2901.33	1x100 double	0.656863	127	4.3519	2.23826	6.59016	45.54
110520_S015	4392	40x Water 2.78Hz	1535	[14.5000000000000,408.500000000000,226.500000000000,30,9,11]	1535x3 double	1535x1 uint16	[29.3520000000000,412.356266666667,231.870400000000]	6254.07	25600	224x2 double	224	1x100 double	1x100 double	7405	2959.05	[256.128560508529,983.855234148697,215.971198101062]	84x1 uint16	33	1	3.50228	3.21705	1x100 double	100	0	TRUE	TRUE	[]	3302.86	1x100 double	0.934256	229	0.233654	7.88914	8.1228	82.26
110520_S015	4392	40x Water 2.78Hz	2950	[195.500000000000,929.500000000000,207.500000000000,39,15,13]	2950x3 double	2950x1 uint16	[215.363498227250,935.895492149249,215.094040182340]	5139.96	30720	401x2 double	401	1x100 double	1x100 double	5431	2266.69	[29.4409226139976,515.526227078879,198.925193153924]	39x1 uint16	72	1.11094	1.82043	5.5535	1x100 double	100	0	TRUE	TRUE	[]	2987.73	1x100 double	0.75	215	1.09432	2.41689	3.51121	77.22
110520_S015	4392	40x Water 2.78Hz	2259	[167.500000000000,424.500000000000,63.5000000000000,31,32,10]	2259x3 double	2259x1 uint16	[179.533081625315,439.613088816972,67.3108594030924]	6303.11	28160	468x2 double	468	1x100 double	1x100 double	4558	2873.54	[39.0234232787236,16.4151943462898,62.4511725024093]	13x1 uint16	89	1.04739	5.45403	2.57014	1x100 double	100	0	TRUE	TRUE	[]	3845.47	1x100 double	0.610242	65	0.515854	8.5974	9.11326	23.22
110520_S015	4392	40x Water 2.78Hz	1891	[12.5000000000000,740.500000000000,76.5000000000000,53,15,10]	1891x3 double	1891x1 uint16	[35.4327485380117,747.995276653171,80.3360323886640]	6018.91	25600	474x2 double	474	1x100 double	1x100 double	2259	1557	[6,156.245022479127,75.9805716120745]	[1282;2259;1526;1161]	272	1.12181	2.1255	2.92995	1x100 double	100	1	TRUE	TRUE	[]	4131.65	1x100 double	0.461438	78	0.205631	4.24047	4.4461	27.9
110520_S015	4392	40x Water 2.78Hz	1042	[13.5000000000000,150.500000000000,148.500000000000,29,9,10]	1042x3 double	1042x1 uint16	[27.0198704103672,154.046220302376,153.083369330454]	5687.52	25600	186x2 double	186	1x100 double	1x100 double	2237	1400.9	[270.455492897423,768.502962381326,142.644657006210]	[924;1304;2226;1501;1427;2237;1082;1407;759;1142]	275	1.0293	2.91866	5.5694	1x100 double	100	0	TRUE	TRUE	[]	4060.22	1x100 double	0.566102	166	1.37415	1.70471	3.07885	59.58
110520_S015	4392	40x Water 2.78Hz	1320	[259.500000000000,621.500000000000,128.500000000000,33,16,12]	1320x3 double	1320x1 uint16	[280.783860759494,629.162658227848,134.505063291139]	6128.48	28160	230x2 double	230	1x100 double	1x100 double	2160	1226.67	[8.10016304347826,175.867445652174,125.905108695652]	15x1 uint16	285	1.26263	4.40089	3.448	1x100 double	100	0	TRUE	TRUE	[]	3628.52	1x100 double	0.622699	133	0.630947	6.39957	7.03052	47.7
110520_S015	4392	40x Water 2.78Hz	1568	[191.500000000000,156.500000000000,195.500000000000,34,15,12]	1568x3 double	1568x1 uint16	[207.678176268600,163.646127432278,201.999809233117]	8558.37	35840	272x2 double	272	1x100 double	1x100 double	2109	1634	[37.2125662994696,927,186.642798857609]	[1751;2109;1042]	292	1.0189	5.90856	5.75325	1x100 double	100	0	TRUE	TRUE	[]	5054.12	1x100 double	0.603352	206	2.952	4.29882	7.25082	73.98
110520_S015	4392	40x Water 2.78Hz	4562	[171.500000000000,714.500000000000,140.500000000000,45,21,16]	4562x3 double	4562x1 uint16	[196.019103388692,724.499952001536,149.176922338485]	5845.58	38400	546x2 double	546	1x100 double	1x100 double	1696	1287.67	[134.293554232462,907,135.732591250324]	[1033;1696;1134]	345	1.02835	7.63419	6.38494	1x100 double	100	0	TRUE	TRUE	[]	3464.91	1x100 double	0.619756	151	2.28706	8.54471	10.8318	54.18
110520_S015	4392	40x Water 2.78Hz	3414	[100.500000000000,354.500000000000,83.5000000000000,45,19,14]	3414x3 double	3414x1 uint16	[123.168205359153,364.389214140959,89.4148840351272]	6660.2	30720	539x2 double	539	1x100 double	1x100 double	1177	828	[45.2019927536232,420.598128019324,81.7572463768116]	[804;662;1177;669]	442	1.05604	4.34649	2.88723	1x100 double	100	0	TRUE	TRUE	[]	4041.86	1x100 double	0.574618	87	0.448626	9.66913	10.1178	31.14
110520_S015	4392	40x Water 2.78Hz	860	[262.500000000000,805.500000000000,213.500000000000,17,14,12]	860x3 double	860x1 uint16	[271.339700567889,811.599896747548,220.534847702633]	5765.95	25600	142x2 double	142	1x100 double	1x100 double	1130	837	[80,31,203.324970131422]	[1130;544]	445	1.10753	2.67397	5.16505	1x100 double	100	0	TRUE	TRUE	[]	3858.03	1x100 double	0.443925	220	0.5976	1.37172	1.96932	79.02
110520_S015	4392	40x Water 2.78Hz	1592	[22.5000000000000,367.500000000000,220.500000000000,33,20,13]	1592x3 double	1592x1 uint16	[34.5259377494014,377.547486033520,225.669859005055]	6044.62	33280	306x2 double	306	1x100 double	1x100 double	1084	759	[246.201581027668,511.677646025472,208]	[734;1084;459]	455	1.00647	3.82524	4.73633	1x100 double	100	0	TRUE	TRUE	[]	3731.24	1x100 double	0.459641	224	0.714433	3.95783	4.67226	80.46
110520_S015	4392	40x Water 2.78Hz	15392	[209.500000000000,443.500000000000,293.500000000000,81,33,15]	15392x3 double	15392x1 uint16	[251.840296362375,460.825800376648,300.622807017544]	6712.02	46080	1643x2 double	1643	1x48 double	1x48 double	1042	671	[222.162071535022,621,276.173248882265]	[371;1042;806;465]	461	1.20276	41.5569	3.31724	1x48 double	48	[]	TRUE	TRUE	[]	3868.83	1x48 double	0.749094	301	1.76106	8.18357	9.94463	108.18
110520_S015	4392	40x Water 2.78Hz	3019	[149.500000000000,928.500000000000,65.5000000000000,18,34,12]	3019x3 double	3019x1 uint16	[158.730409446404,946.079282318663,70.6520472320196]	5529.57	25600	453x2 double	453	1x100 double	1x100 double	1015	1015	[43,471,64]	1015	464	1.12037	3.16339	4.99587	1x100 double	100	0	TRUE	TRUE	[]	3051.66	1x100 double	0.812963	71	1.29071	11.6505	12.9412	25.38
110520_S015	4392	40x Water 2.78Hz	1911	[170.500000000000,460.500000000000,294.500000000000,31,13,13]	1911x3 double	1911x1 uint16	[186.192527148905,465.990060739923,300.056322473771]	7278.12	38400	263x2 double	263	1x49 double	1x49 double	366	366	[154,857,277]	366	543	1.07258	22.6979	1.77444	1x49 double	49	[]	TRUE	TRUE	[]	4652.78	1x49 double	0.638075	309	4.6125	3.1725	7.785	111.06

## Sheet: Averaged per recording NaBu
Recording	Mice	Gender	Age	Imaging	numEvents	frequency (Hz)	amp (df/F0)	Area	Area2D (pixel)	Half Rise Time (s)	Half Decay Time (s)	FWHM	AmpxArea	AmpxArea2D	Total Area2D (pixel)	Total Area (pixel)	Mitochondria area (pixel)	2D area ratio
113020_S009	4408	Male	4 month	40x water	17	0.142236	0.944531	12096.8	1410.12	3.6851	6.87476	10.5599	11425.8	1331.9	23972	205646	133266	0.179881
113020_S007	4408	Male	4 month	40x water	11	0.0920348	0.618858	13069.8	1532.73	2.62861	7.04286	9.47897	8088.36	948.54	16860	143768	149946	0.11244
113020_S002	4408	Male	4 month	40x water	2	0.0167336	0.89792	45812	3040.5	2.37366	6.65589	9.02955	41135.5	2730.13	6081	91624	141277	0.0430431
112920_S003	4407	Male	4 month	40x water	7	0.0585676	0.530032	2137	435.714	0.819521	2.68919	3.50871	1132.68	230.943	3050	14959	145050	0.0210272
120820_S055	4356	Female	6 month	40x water	9	0.0753012	0.501604	43184.2	4106.89	3.75011	8.25996	12.0101	21661.4	2060.03	36962	388658	123706	0.298789
120820_S026	4356	Female	6 month	40x water	6	0.0502008	0.493701	2229	500.5	2.63913	3.92283	6.56196	1100.46	247.097	3003	13374	125761	0.0238786
120920_S012	4355	Female	6 month	40x water	5	0.041834	0.244267	13901.4	1782.8	1.69622	9.64837	11.3446	3395.65	435.479	8914	69507	129131	0.0690307
120820_S009	4356	Female	6 month	40x water	6	0.0502008	0.695008	10946.7	1689.17	4.56995	10.3769	13.9655	7608.02	1173.98	10135	65680	137013	0.0739711
012021_S005	4422	Male	5 month	40x water	11	0.0920348	0.659373	5967.45	792	1.714	5.0284	6.7424	3934.78	522.224	8712	65642	129665	0.0671885
012021_S010	4422	Male	5 month	40x water	7	0.0585676	1.62187	19518.3	2608.71	0.677796	2.93384	3.61164	31656.1	4231	18261	136628	130035	0.140431
012021_S011	4422	Male	5 month	40x water	19	0.158969	0.700166	21496	2263.05	3.69094	6.41237	10.1033	15050.8	1584.51	42998	408424	143325	0.300003
012021_S012	4422	Male	5 month	40x water	17	0.142236	0.508632	5754.65	974.059	2.21282	5.01906	7.23187	2927	495.437	16559	97829	157854	0.104901
012021_S019	4422	Male	5 month	40x water	4	0.0334672	0.836095	7616.5	1023	2.82816	5.85049	8.67866	6368.12	855.326	4092	30466	138445	0.0295569
012021_S030	4422	Male	5 month	40x water	27	0.225904	0.847554	5457.56	804.37	2.23802	3.16584	5.11931	4625.57	681.747	21718	147354	136031	0.159655
012021_S035	4422	Male	5 month	40x water	8	0.0669344	0.57305	5073.12	665.75	2.02286	4.71128	6.73414	2907.15	381.508	5326	40585	132510	0.0401932
012021_S042	4422	Male	5 month	40x water	23	0.192436	0.701077	3566.17	627	3.47873	3.74947	7.2282	2500.16	439.575	14421	82022	99932	0.144308
012021_S045	4422	Male	5 month	40x water	3	0.0251004	0.723305	16394	1598.33	2.22246	8.19783	10.4203	11857.9	1156.08	4795	49182	120992	0.0396307
012021_S056	4422	Male	5 month	40x water	3	0.0251004	0.738989	22048.3	2327	2.89729	4.58657	7.48386	16293.5	1719.63	6981	66145	147748	0.0472494

## Sheet: Individual mitoflash NaBu
Recording	Mice	Imaging	Area								Area 2D (pixel)							ID					Length						amp (df/F0)	PeakFrame	Half Rise Time	Half Decay Time	FWHM	Peak Time
113020_S009	4408	40x water	15177	[17.5000000000000,511.500000000000,201.500000000000,90,50,13]	15177x3 double	15177x1 uint16	[66.4031900919497,533.621204728842,208.625107900169]	4494.38	30720	2141x2 double	2141	1x55 double	1x55 double	126	84.75	[30.1917404129794,77.4439528023599,180.309734513274]	[92;126;120;66;64;47;117;46]	166	1.02473	2.60509	4.2973	1x55 double	55	TRUE	TRUE	[]	2704.68	1x55 double	0.667551	209	1.36457	3.22667	4.59124	75.06
113020_S009	4408	40x water	5144	[85.5000000000000,174.500000000000,289.500000000000,45,20,15]	5144x3 double	5144x1 uint16	[108.199707602339,184.571247563353,297.728362573099]	5106.07	28160	578x2 double	578	1x51 double	1x51 double	893	286.795	[292.546961053682,542.873033278711,263.792269876668]	283x1 uint16	17	1.15464	5.63384	2.625	1x51 double	51	TRUE	FALSE	[]	3144.64	1x51 double	0.609859	298	1.21111	6.6975	7.90861	107.1
113020_S009	4408	40x water	15134	[183.500000000000,673.500000000000,203.500000000000,75,63,14]	15134x3 double	15134x1 uint16	[218.729114824031,701.662637753288,210.317494173875]	4282.51	46080	2044x2 double	2044	1x100 double	1x100 double	738	220.85	[7.95332050048123,447.094474582203,187.869542392160]	207x1 uint16	27	1.10258	0.757231	4.87463	1x100 double	100	TRUE	FALSE	[]	2508.65	1x100 double	0.802796	209	0.762301	3.09474	3.85704	75.06
113020_S009	4408	40x water	1691	[127.500000000000,243.500000000000,228.500000000000,20,17,13]	1691x3 double	1691x1 uint16	[139.496197718631,252.232572877060,234.264575411914]	4777.86	25600	215x2 double	215	1x100 double	1x100 double	722	249.122	[293.357173161021,507.489997389204,209.143969062072]	246x1 uint16	30	1.25532	4.30842	3.92655	1x100 double	100	TRUE	TRUE	[]	2452.84	1x100 double	1.10194	250	7.10437	13.8881	20.9925	89.82
113020_S009	4408	40x water	2781	[158.500000000000,568.500000000000,243.500000000000,23,28,13]	2781x3 double	2781x1 uint16	[168.414898488780,584.414440543428,249.788429247443]	6030.41	51200	386x2 double	386	1x99 double	1x99 double	707	225.52	[281.377858041214,1008.18982392209,224.808289528846]	550x1 uint16	33	1.07339	9.1042	4.05128	1x99 double	99	TRUE	TRUE	[]	3820.1	1x99 double	0.737847	270	8.41701	16.0255	24.4426	97.02
113020_S009	4408	40x water	114	[77.5000000000000,479.500000000000,85.5000000000000,8,12,5]	114x3 double	114x1 uint16	[82.2931937172775,486.643979057592,87.8272251308901]	4289.12	25600	50x2 double	50	1x100 double	1x100 double	554	207.188	[292.573919148189,630.857280758205,80.6406716199614]	165x1 uint16	54	1.06434	3.97036	5.81612	1x100 double	100	TRUE	FALSE	[]	3123.2	1x100 double	3.7377	128	3.12686	2.47304	5.5999	45.9
113020_S009	4408	40x water	46565	[86.5000000000000,147.500000000000,63.5000000000000,120,87,21]	46565x3 double	46565x1 uint16	[147.330727634735,192.497782705100,75.3775510204082]	4859.74	46080	4667x2 double	4667	1x100 double	1x100 double	542	155.728	[293.314048965351,556.414476058710,65.4495007218479]	427x1 uint16	55	1.10002	4.02667	6.10296	1x100 double	100	TRUE	FALSE	[]	2813.42	1x100 double	0.755703	78	2.68483	11.3421	14.027	27.9
113020_S009	4408	40x water	5994	[63.5000000000000,473.500000000000,115.500000000000,32,26,17]	5994x3 double	5994x1 uint16	[82.5707691263322,485.617133935239,124.623718688480]	6291.52	48640	555x2 double	555	1x100 double	1x100 double	470	154.587	[293.567876469491,760.512300180382,114.476845804566]	416x1 uint16	61	1.00369	4.36451	6.62534	1x100 double	100	TRUE	FALSE	[]	2988.97	1x100 double	1.07407	128	3.25213	4.37434	7.62647	45.9
113020_S009	4408	40x water	3369	[213.500000000000,249.500000000000,207.500000000000,33,24,11]	3369x3 double	3369x1 uint16	[232.315297363581,259.756897608829,213.199417535254]	4957.39	38400	501x2 double	501	1x100 double	1x100 double	223	82.6667	[289.713002263724,692.942840973401,190.768039049236]	171x1 uint16	123	1.13255	0.747831	4.28479	1x100 double	100	TRUE	FALSE	[]	3178.28	1x100 double	0.715434	212	0.684184	1.7946	2.47878	76.14
113020_S009	4408	40x water	3178	[70.5000000000000,472.500000000000,202.500000000000,22,23,12]	3178x3 double	3178x1 uint16	[83.6317036667498,484.235719630831,208.490646046396]	6458.8	38400	417x2 double	417	1x100 double	1x100 double	205	83.1468	[109.265001663297,642.491875431818,183.195450241818]	470x1 uint16	126	1.41618	33.503	4.5551	1x100 double	100	TRUE	FALSE	[]	3394.92	1x100 double	0.981917	209	1.3696	2.4084	3.778	75.06
113020_S009	4408	40x water	3091	[89.5000000000000,757.500000000000,156.500000000000,60,27,10]	3091x3 double	3091x1 uint16	[116.531415273958,770.073831182568,161.154220435794]	3914.95	23040	724x2 double	724	1x100 double	1x100 double	100	66.6701	[210.348847997526,449.836400185557,143.447811968455]	194x1 uint16	185	1.08163	3.62291	2.4271	1x100 double	100	TRUE	FALSE	[]	2846.41	1x100 double	0.424845	159	0.168197	1.43333	1.60153	57.06
113020_S009	4408	40x water	13428	[118.500000000000,516.500000000000,239.500000000000,83,66,21]	13428x3 double	13428x1 uint16	[168.224203028298,546.364641314079,249.631544120509]	4897.9	38400	1709x2 double	1709	1x99 double	1x99 double	91	45.5676	[14.6340450771056,428.150059311981,217.956109134045]	37x1 uint16	191	1.0604	13.9602	4.06646	1x99 double	99	TRUE	TRUE	[]	3057.32	1x99 double	0.734934	281	12.4014	17.5837	29.9852	100.98
113020_S009	4408	40x water	6020	[52.5000000000000,181.500000000000,64.5000000000000,39,25,20]	6020x3 double	6020x1 uint16	[72.1522136209446,195.451770026964,76.0277463686179]	4889.09	33280	593x2 double	593	1x100 double	1x100 double	56	37.8947	[265.680555555556,973.041666666667,59.5569444444445]	19x1 uint16	223	1.05224	6.93699	5.91135	1x100 double	100	TRUE	FALSE	[]	2935.58	1x100 double	0.669118	84	3.75962	7.86349	11.6231	30.06
113020_S009	4408	40x water	1493	[124.500000000000,604.500000000000,238.500000000000,18,13,15]	1493x3 double	1493x1 uint16	[132.770994832041,610.448966408269,244.822351421189]	5308.61	28160	178x2 double	178	1x100 double	1x100 double	53	41.75	[54.4670658682635,29.7844311377246,216.161676646707]	[36;53;51;27]	226	1	8.90936	3.62745	1x100 double	100	TRUE	TRUE	[]	3235.96	1x100 double	0.582222	243	0.3275	2.75891	3.08641	87.3
113020_S009	4408	40x water	62689	[14.5000000000000,491.500000000000,114.500000000000,193,107,22]	62689x3 double	62689x1 uint16	[116.496492588836,540.888069687956,126.125695728885]	4791.06	43520	6943x2 double	6943	1x100 double	1x100 double	46	46	[294,669,104]	46	241	1.00546	4.3403	6.60646	1x100 double	100	TRUE	FALSE	[]	2868.98	1x100 double	0.633081	130	3.32722	6.09559	9.42281	46.62
113020_S009	4408	40x water	2305	[263.500000000000,684.500000000000,161.500000000000,22,18,12]	2305x3 double	2305x1 uint16	[271.069034185198,692.498838367076,167.473946232990]	3346.33	28160	300x2 double	300	1x100 double	1x100 double	40	36.5	[45.5479452054795,963,147]	[33;40]	251	1.24194	1.4013	4.55844	1x100 double	100	TRUE	TRUE	[]	1510.4	1x100 double	1.11299	166	0.892	3.159	4.051	59.58
113020_S009	4408	40x water	17473	[19.5000000000000,509.500000000000,242.500000000000,100,50,19]	17473x3 double	17473x1 uint16	[73.3712547353920,532.753616117553,251.154172884858]	5105.06	33280	1971x2 double	1971	1x98 double	1x98 double	33	24.3333	[74.2328767123288,856.321917808219,220.465753424658]	[33;28;17;32;19;17]	266	1.03256	20.8336	3.54402	1x98 double	98	TRUE	FALSE	[]	3071.74	1x98 double	0.715011	280	11.7937	12.6517	24.4454	100.62
113020_S007	4408	40x water	3199	[274.500000000000,407.500000000000,19.5000000000000,22,36,18]	3199x3 double	3199x1 uint16	[283.623891188646,432.380839739799,31.0387344766410]	5412.89	33280	465x2 double	465	1x100 double	1x100 double	19575	5748.2	[291.578562192473,888.200423658583,26.4528487671073]	550x1 uint16	4	1.04011	5.97172	3.83747	1x100 double	100	TRUE	TRUE	[]	3215.14	1x100 double	0.421233	40	3.135	1.72929	4.86429	14.22
113020_S007	4408	40x water	4583	[100.500000000000,975.500000000000,171.500000000000,33,49,12]	4583x3 double	4583x1 uint16	[119.091751297000,997.703707380075,176.203626977831]	6154.96	28160	836x2 double	836	1x100 double	1x100 double	4151	1501.18	[10.3501782284868,1016.19720645449,161.480635811524]	94x1 uint16	52	1.0646	2.11175	4.10291	1x100 double	100	TRUE	TRUE	[]	4871.68	1x100 double	0.263943	174	0.508992	5.29171	5.8007	62.46
113020_S007	4408	40x water	4411	[29.5000000000000,802.500000000000,260.500000000000,16,31,16]	4411x3 double	4411x1 uint16	[37.3238654182160,816.511491420635,268.557277899736]	12954.4	61440	391x2 double	391	1x80 double	1x80 double	1798	801.719	[28.3534517102043,672.618410069622,239.075081099539]	263x1 uint16	118	1.32806	5.725	2.99373	1x80 double	80	TRUE	TRUE	[]	8099.03	1x80 double	0.658044	280	5.86569	18.288	24.1537	100.62
113020_S007	4408	40x water	17466	[153.500000000000,815.500000000000,92.5000000000000,58,137,16]	17466x3 double	17466x1 uint16	[188.665251667677,887.725618832350,100.474033849716]	5317.28	35840	2780x2 double	2780	1x100 double	1x100 double	1619	929.92	[273.896507226428,740.638850653820,86.5954920853407]	25x1 uint16	124	1.05318	7.41397	4.9802	1x100 double	100	TRUE	TRUE	[]	3795.8	1x100 double	0.34425	99	0.948205	12.0416	12.9898	35.46
113020_S007	4408	40x water	8046	[87.5000000000000,906.500000000000,49.5000000000000,30,45,15]	8046x3 double	8046x1 uint16	[102.823487692950,927.384480600751,56.7707133917397]	7626.55	40960	823x2 double	823	1x100 double	1x100 double	1478	856	[6.53426791277259,916.736954828661,47.5062305295950]	18x1 uint16	138	1.05769	7.29371	5.52955	1x100 double	100	TRUE	TRUE	[]	4933.37	1x100 double	0.528373	62	3.59473	11.0057	14.6004	22.14
113020_S007	4408	40x water	1072	[244.500000000000,356.500000000000,163.500000000000,11,17,10]	1072x3 double	1072x1 uint16	[250.259074733096,365.854448398577,168.681850533808]	6710.45	46080	151x2 double	151	1x100 double	1x100 double	1306	769.892	[12.2344184001759,785.162919888896,152.726695042264]	65x1 uint16	147	1.22814	1.50739	4.5418	1x100 double	100	TRUE	TRUE	[]	4204.5	1x100 double	0.669355	168	0.929032	0.678	1.60703	60.3
113020_S007	4408	40x water	28158	[154.500000000000,813.500000000000,224.500000000000,71,141,22]	28158x3 double	28158x1 uint16	[189.068319761901,886.137007373719,237.250405470932]	5437.39	43520	3117x2 double	3117	1x100 double	1x100 double	1149	502.265	[209.428588842388,995.996221201902,209.791922311162]	49x1 uint16	156	1.07491	7.83164	5.9849	1x100 double	100	TRUE	TRUE	[]	3652.33	1x100 double	0.48662	249	5.37303	9.84818	15.2212	89.46
113020_S007	4408	40x water	1266	[58.5000000000000,921.500000000000,222.500000000000,23,38,10]	1266x3 double	1266x1 uint16	[69.6673709628735,939.121642016300,227.661635979475]	6699.27	33280	311x2 double	311	1x100 double	1x100 double	967	447.435	[278.743076474589,745.903896608687,207.457195607813]	23x1 uint16	171	1.09985	9.94354	6.02003	1x100 double	100	TRUE	TRUE	[]	4823.67	1x100 double	1.61945	269	2.661	[]	[]	96.66
113020_S007	4408	40x water	69114	[2.50000000000000,828.500000000000,254.500000000000,104,148,30]	69114x3 double	69114x1 uint16	[61.7424889251862,919.133862944539,267.827307149751]	5986.74	58880	6900x2 double	6900	1x81 double	1x81 double	962	709.125	[6.23426758328927,951.594218226688,230.347964040190]	[645;962;742;705;597;791;607;624]	172	1.02757	7.96822	6.30551	1x81 double	81	TRUE	TRUE	[]	3617.02	1x81 double	0.602831	274	4.32871	[]	[]	98.46
113020_S007	4408	40x water	2903	[183.500000000000,325.500000000000,293.500000000000,27,26,12]	2903x3 double	2903x1 uint16	[200.332434750643,338.085896336233,299.255238328636]	7196.75	43520	401x2 double	401	1x50 double	1x50 double	759	759	[214,1009,270]	759	192	1.39659	3.48325	2.54504	1x50 double	50	TRUE	TRUE	[]	4309.23	1x50 double	0.773333	298	0.779492	2.13943	2.91892	107.1
113020_S007	4408	40x water	3550	[165.500000000000,475.500000000000,217.500000000000,32,53,10]	3550x3 double	3550x1 uint16	[176.573070866142,500.887716535433,222.066456692913]	4579.15	25600	685x2 double	685	1x100 double	1x100 double	525	356.8	[267.279147982063,994,201.670403587444]	[363;225;272;399;525]	224	1.12008	1.55299	4.03853	1x100 double	100	TRUE	TRUE	[]	3176.64	1x100 double	0.44	221	0.790866	2.36377	3.15464	79.38
113020_S002	4408	40x water	1788	[266.500000000000,132.500000000000,63.5000000000000,20,25,10]	1788x3 double	1788x1 uint16	[277.357084690554,147.467426710098,68.6473941368078]	3516.42	20480	297x2 double	297	1x100 double	1x100 double	4220	1848.08	[273.775847841673,861.441520230510,60.1389148167688]	80x1 uint16	49	1.09581	7.74274	3.40437	1x100 double	100	TRUE	TRUE	[]	2172.12	1x100 double	0.646825	68	0.90375	1.0575	1.96125	24.3
113020_S002	4408	40x water	89836	[73.5000000000000,862.500000000000,86.5000000000000,129,83,33]	89836x3 double	89836x1 uint16	[136.874181839998,906.229582745898,108.385349611543]	4749.92	46080	5784x2 double	5784	1x100 double	1x100 double	3512	1708.6	[182.840333834998,658.659149298430,82.9044100880193]	77x1 uint16	77	1.02003	7.2371	6.60118	1x100 double	100	TRUE	TRUE	[]	2494.94	1x100 double	1.14902	114	3.84357	12.2543	16.0979	40.86
112920_S003	4407	40x water	932	[189.500000000000,48.5000000000000,19.5000000000000,19,20,5]	932x3 double	932x1 uint16	[199.603990790484,57.4666155026861,21.2148887183423]	3579.06	23040	317x2 double	317	1x100 double	1x100 double	18600	7057.7	[199.652400796987,58.0954937034930,20.7940920439042]	932x1 uint16	11	1.18341	4.82662	5.04428	1x100 double	100	TRUE	TRUE	[]	2091.61	1x100 double	0.857143	17	1.53176	7.54468	9.07645	5.94
112920_S003	4407	40x water	874	[86.5000000000000,955.500000000000,182.500000000000,12,18,8]	874x3 double	874x1 uint16	[91.7887759611136,962.287671232877,186.492266902342]	6628.47	30720	161x2 double	161	1x100 double	1x100 double	2523	1428.58	[288.309371887031,452.203241525994,169.589343887139]	26x1 uint16	144	1.0531	3.18228	3.01681	1x100 double	100	TRUE	TRUE	[]	4547.58	1x100 double	0.479021	184	0.188244	2.32154	2.50978	66.06
112920_S003	4407	40x water	2569	[148.500000000000,461.500000000000,86.5000000000000,34,30,8]	2569x3 double	2569x1 uint16	[164.039922730200,472.510195320884,90.1362953423482]	4642.68	28160	505x2 double	505	1x100 double	1x100 double	2356	1572.9	[288.051052196580,21.9715811558268,81.0455845889758]	[1031;1927;1591;1730;2356;1178;2136;1879;1184;717]	149	1.20038	1.47726	3.71496	1x100 double	100	TRUE	TRUE	[]	3213.94	1x100 double	0.533123	89	0.49968	1.18667	1.68635	31.86
112920_S003	4407	40x water	1044	[59.5000000000000,106.500000000000,267.500000000000,22,23,10]	1044x3 double	1044x1 uint16	[70.4914950760967,119.611906893465,271.817815577440]	5478.01	28160	272x2 double	272	1x77 double	1x77 double	1725	1111.25	[294.692913385827,476.474803149606,249.217435320585]	[740;1138;998;1725;1616;594;1212;867]	177	1.11111	2.85009	5.3	1x77 double	77	TRUE	TRUE	[]	4094.12	1x77 double	0.349425	273	1.638	2.4	4.038	98.1
112920_S003	4407	40x water	2788	[124.500000000000,475.500000000000,85.5000000000000,28,24,11]	2788x3 double	2788x1 uint16	[139.824625354395,487.208991494532,90.4139327663022]	4534.18	30720	475x2 double	475	1x100 double	1x100 double	1512	1155	[4.82121212121212,726.010822510823,81]	[826;1116;1512;1166]	190	1.03976	1.27077	3.61185	1x100 double	100	TRUE	TRUE	[]	3104.34	1x100 double	0.569444	89	0.531111	2.13923	2.67034	31.86
112920_S003	4407	40x water	2837	[101.500000000000,943.500000000000,158.500000000000,37,27,10]	2837x3 double	2837x1 uint16	[119.222626007268,956.417127508295,163.180281245062]	5711.05	33280	526x2 double	526	1x100 double	1x100 double	838	594.75	[47.4787725935267,663.831021437579,147.200924758302]	[402;838;661;478]	229	1.13292	1.0127	3.98772	1x100 double	100	TRUE	TRUE	[]	4020.08	1x100 double	0.501211	162	0.543644	1.59254	2.13619	58.14
[truncated: 149 more rows]
