# Supplementary material for: Butyrate Feeding Reverses CypD-Related Mitoflash Phenotypes in Mouse Myofibers
Source: Int J Mol Sci. 2021 Jul 10;22(14):7412. doi: 10.3390/ijms22147412 (PMC8304904; doi:10.3390/ijms22147412)
Supplement: Supplementary file 1 [file ijms-22-07412-s001.zip › Spreadsheet S3.xlsx]

## Sheet: Spreadsheet S3
Sample	RQ	Treatment	Replicate	Mouse ID	Genotype	Pair No	Gender
TA 1	1.03838	Control	1	4352	hSOD1G93A	1	Male
TA 2	0.338474	NaBu	1	4353	hSOD1G93A	1	Male
TA 3	0.43964	NaBu	1	4394	hSOD1G93A	2	Male
TA 4	0.299108	Control	1	4395	hSOD1G93A	2	Male
TA 5	0.25837	NaBu	1	4417	hSOD1G93A	3	Male
TA 6	0.317495	Control	1	4426	hSOD1G93A	3	Male
TA 7	0.364291	NaBu	1	4357	hSOD1G93A	4	Female
TA 8	0.488251	Control	1	4358	hSOD1G93A	4	Female
TA 9	0.470498	NaBu	1	4381	hSOD1G93A	5	Female
TA 10	1.51345	Control	1	4382	hSOD1G93A	5	Female
TA 11	1.55814	NaBu	1	4397	hSOD1G93A	6	Female
TA 12	2.17172	Control	1	4398	hSOD1G93A	6	Female
TA 13	2.06836	NaBu	1	4546	hSOD1G93A	7	Male
TA 14	2.6713	Control	1	4545	hSOD1G93A	7	Male
TA 1	0.899123	Control	2	4352	hSOD1G93A	1	Male
TA 2	0.332893	NaBu	2	4353	hSOD1G93A	1	Male
TA 3	0.447786	NaBu	2	4394	hSOD1G93A	2	Male
TA 4	0.364597	Control	2	4395	hSOD1G93A	2	Male
TA 5	0.233871	NaBu	2	4417	hSOD1G93A	3	Male
TA 6	0.434292	Control	2	4426	hSOD1G93A	3	Male
TA 7	0.321804	NaBu	2	4357	hSOD1G93A	4	Female
TA 8	0.473877	Control	2	4358	hSOD1G93A	4	Female
TA 9	0.440154	NaBu	2	4381	hSOD1G93A	5	Female
TA 10	1.57644	Control	2	4382	hSOD1G93A	5	Female
TA 11	1.35834	NaBu	2	4397	hSOD1G93A	6	Female
TA 12	2.07736	Control	2	4398	hSOD1G93A	6	Female
TA 13	2.14597	NaBu	2	4546	hSOD1G93A	7	Male
TA 14	2.77482	Control	2	4545	hSOD1G93A	7	Male
TA 1	1.07109	Control	3	4352	hSOD1G93A	1	Male
TA 2	0.280712	NaBu	3	4353	hSOD1G93A	1	Male
TA 3	0.406253	NaBu	3	4394	hSOD1G93A	2	Male
TA 4	0.301351	Control	3	4395	hSOD1G93A	2	Male
TA 5	0.21547	NaBu	3	4417	hSOD1G93A	3	Male
TA 6	0.305344	Control	3	4426	hSOD1G93A	3	Male
TA 7	0.350968	NaBu	3	4357	hSOD1G93A	4	Female
TA 8	0.457465	Control	3	4358	hSOD1G93A	4	Female
TA 9	0.426159	NaBu	3	4381	hSOD1G93A	5	Female
TA 10	1.5586	Control	3	4382	hSOD1G93A	5	Female
TA 11	1.58986	NaBu	3	4397	hSOD1G93A	6	Female
TA 12	2.09609	Control	3	4398	hSOD1G93A	6	Female
TA 13	2.24065	NaBu	3	4546	hSOD1G93A	7	Male
TA 14	2.76813	Control	3	4545	hSOD1G93A	7	Male
TA 1	0.748624	Control	4	4352	hSOD1G93A	1	Male
TA 2	0.431881	NaBu	4	4353	hSOD1G93A	1	Male
TA 3	0.299076	NaBu	4	4394	hSOD1G93A	2	Male
TA 4	0.486056	Control	4	4395	hSOD1G93A	2	Male
TA 5	0.342464	NaBu	4	4417	hSOD1G93A	3	Male
TA 6	0.357532	Control	4	4426	hSOD1G93A	3	Male
TA 7	0.348023	NaBu	4	4357	hSOD1G93A	4	Female
TA 8	0.400358	Control	4	4358	hSOD1G93A	4	Female
TA 9	0.544481	NaBu	4	4381	hSOD1G93A	5	Female
TA 10	1.30897	Control	4	4382	hSOD1G93A	5	Female
TA 11	1.98124	NaBu	4	4397	hSOD1G93A	6	Female
TA 12	2.86275	Control	4	4398	hSOD1G93A	6	Female
TA 13	2.12	NaBu	4	4546	hSOD1G93A	7	Male
TA 14	2.77476	Control	4	4545	hSOD1G93A	7	Male
TA 1	1.33579	Control	5	4352	hSOD1G93A	1	Male
TA 2	0.461264	NaBu	5	4353	hSOD1G93A	1	Male
TA 3	0.515554	NaBu	5	4394	hSOD1G93A	2	Male
TA 4	0.540798	Control	5	4395	hSOD1G93A	2	Male
TA 5	0.394297	NaBu	5	4417	hSOD1G93A	3	Male
TA 6	0.41895	Control	5	4426	hSOD1G93A	3	Male
TA 7	0.197993	NaBu	5	4357	hSOD1G93A	4	Female
TA 8	0.377254	Control	5	4358	hSOD1G93A	4	Female
TA 9	0.526377	NaBu	5	4381	hSOD1G93A	5	Female
TA 10	1.38045	Control	5	4382	hSOD1G93A	5	Female
TA 11	1.87582	NaBu	5	4397	hSOD1G93A	6	Female
TA 12	2.5234	Control	5	4398	hSOD1G93A	6	Female
TA 13	2.18496	NaBu	5	4546	hSOD1G93A	7	Male
TA 14	2.7129	Control	5	4545	hSOD1G93A	7	Male
