# Supplementary material for: Butyrate Feeding Reverses CypD-Related Mitoflash Phenotypes in Mouse Myofibers
Source: Int J Mol Sci. 2021 Jul 10;22(14):7412. doi: 10.3390/ijms22147412 (PMC8304904; doi:10.3390/ijms22147412)
Supplement: Supplementary file 1 [file ijms-22-07412-s001.zip › Spreadsheet S4.xlsx]

## Sheet: Sheet1
Sample	Treatment	CypD	GAPDH	CypD/GAPDH	Genotype	Mouse ID	Gender
TA1	Control	16.577	73.708	0.224901	wt	wt78d	Male
TA2	Control	22.786	70.604	0.32273	wt	wt104	Male
TA3	Control	40.781	72.577	0.5619	hSOD1G93A	2282	Female
TA4	NaBu	37.649	66.221	0.568536	hSOD1G93A	2283	Female
TA5	Control	48.94	69.643	0.702727	hSOD1G93A	2284	Female
TA6	NaBu	37.32	75.367	0.495177	hSOD1G93A	2285	Female
TA7	Control	28.617	69.534	0.411554	hSOD1G93A	2257	Male
TA8	NaBu	16.551	67.301	0.245925	hSOD1G93A	2255	Male
TA9	Control	32.604	72.3	0.450954	hSOD1G93A	2259	Male
TA10	NaBu	30.659	69.22	0.442921	hSOD1G93A	2252	Male
TA11	Control	25.751	66.816	0.385402	hSOD1G93A	2258	Male
TA12	NaBu	14.048	65.743	0.213681	hSOD1G93A	2254	Male
